# Supplementary material for: Pregnancy and Early Life Gut Microbiome: Influencing Factors and Health Implications
Source: Research Square preprint supplement (doi:10.21203/rs.3.rs-5334252/v1), 2024-10-31
Supplement: Supplementary file 1 [file 7fb37e89e0b9f0c02cb5151e.xlsx]

## Sheet: Index
Tables S1 - S15. Index
Table number	Table Title
Table S1.	Codebook of cross-sectional mother and infant metadata
Table S2.	Codebook of longitudinal mother and infant metadata
Table S3.	Summary statistics of cross-sectional, numeric metadata linked with infant gut microbiome
Table S4.	Summary statistics of cross-sectional, categorical metadata linked with infant gut microbiome
Table S5.	Summary statistics of longitudinal, numeric metadata linked with infant gut microbiome
Table S6.	Summary statistics of longitudinal, categorical metadata linked with infant gut microbiome
Table S7.	Summary statistics of cross-sectional, numeric metadata linked with mother gut microbiome
Table S8.	Summary statistics of cross-sectional, categorical metadata linked with mother gut microbiome
Table S9.	Summary statistics of longitudinal, numeric metadata linked with mother gut microbiome
Table S10.	Summary statistics of longitudinal, categorical metadata linked with mother gut microbiome
Table S11.	Summary statistics of mother and infant taxa of all fecal samples
Table S12.	Summary statistics of mother and infant taxa of fecal samples over time (long format)
Table S13.	Summary statistics of mother and infant taxa of fecal samples over time (wide format)
Table S14.	Summary statistics of the relative abundance of breast mlik HMOs from all breast milk samples over time
Table S15.	Summary statistics of mother milk group from all breast milk samples over time

## Sheet: Table S1.
Table S1. Codebook of cross-sectional mother and infant metadata
Phenotype	Description	Categories (if categorical)
general_family_information
FAMILY	Family ID of families in Lifelines-NEXT	[fam_ids]
next_id_mother	NEXT identification number of the mother	[next_ids]
next_id_infant	NEXT identification number of the mother	[next_ids]
next_id_partner	NEXT identification number of the partner	[next_ids]
infant_relations	How are the infants related to each other?	no_mother_infant_pair, singleton, twins
sibling_number	If there are siblings, which sibling was born first?	no, sibling_1, sibling_2, sibling_3, withdrawn
twin_pair	Are there infants who are twins?	no, pair_1, pair_2
mother_pre_pregnancy
mother_lifelinesbirthcards_prepreg_bmi_kg_m2	What is the pre-pregnancy BMI of the mother (8 yrs before conception)?	[numeric]
mother_infant_pregnancy_delivery
mother_education_and_income
mother_education_p18	What is the educational level of the mother?	0 (elementary_to_lower_secondary_education), 1 (upper_secondary_education), 2 (tertiary_education)
mother_income_net_p18	What are the income brackets of the mother?	0 (low_income), 1 (middle_income), 2 (high_income)
mother_pre_and_during_pregnancy_health
mother_health_age_menarche_p18	How old were you when you first started menstrating?	[numeric]
mother_health_menst_pattern_regular_prior_pregnancy_p18	Before your current pregnancy, was your menstration regular?	1_regular, 2_never_been_regular, 3_irregular_for_few_months, 4_irregular_for_few_years
mother_health_contra_use_injection_p18	Before your current pregnancy, did you use a contraceptive injection?	no, yes
mother_health_contra_use_pill_p18	Before your current pregnancy, did you use contraceptive pills?	no, yes
mother_health_contra_use_nuvaring_p18	Before your current pregnancy, did you use the NuvaRing (estradiol vaginal ring)?	no, yes
mother_health_contra_use_hormonaliud_p18	Before your current pregnancy, did you use a hormonal Intrauterine Device ?	no, yes
mother_health_contra_use_implant_p18	Before your current pregnancy, did you use an contraceptive implant?	no, yes
mother_health_coital_freq_with_father_of_child_first_trimester_p18	Can you indicate how often you had sexual intercourse with the father of the child you are now pregnant with, in the first trimester of pregnancy?	1_monthly, 2_weekly
mother_health_number_of_coitus_partners_p18	With how many partners have you had sexual intercourse with, in total?	[numeric]
mother_health_prior_pregnancy_endometriosis_p18	Were you diagnosed with endometriosis before your current pregnancy and/or do you have any current associated complaints?	no, yes
mother_health_prior_pregnancy_pcos_p18	Were you diagnosed with polycystic ovarian syndrome before your current pregnancy and/or do you have any current associated complaints?	no, yes
mother_health_prior_pregnancy_ovarian_cysts_p18	Were you diagnosed with ovarian cysts before your current pregnancy and/or do you have any current associated complaints?	no, yes
mother_health_prior_pregnancy_std_p18	Were you diagnosed with a sexually transmitted disease before your current pregnancy and/or do you have any current associated complaints?	no, yes
mother_health_prior_pregnancy_std_chlam_p18	Were you diagnosed with chlamydia before your current pregnancy and/or do you have any current associated complaints?	no, yes
mother_health_prior_pregnancy_std_herpes_p18	Were you diagnosed with herpes before your current pregnancy and/or do you have any current associated complaints?	no, yes
mother_health_eating_disorder_p18	Have you had an eating disorder	no, yes
mother_birthcardhealth_previous_preg_p18	Have you ever been pregnant before? (By this we also mean a pregnancy that has not ended in childbirth, e.g. a miscarriage or ectopic pregnancy)?	no, yes
mother_health_alcohol_first_trimester_p18	Did you drink alcohol during the first trimester (1-3 months) of your current pregnancy?	1_yes, 2_no, 3_do_not_know
mother_health_smoked_one_whole_year_p18	Have you ever smoked for a full year?	no, yes
mother_health_smoking_duration_p18	For how many years were you smoking?	[numeric]
mother_health_exposure_secondhand_smoke_while_pregnant_first_trimester_p18	Were you exposed to second hand tobacco smoke during the first trimester (1-3 months) of your current pregnancy?	no, yes
mother_health_drug_use_one_year_before_pregnancy_p18	Did you use drugs one year before your pregnancy?	no, yes
mother_health_regular_dentist_visits_p18	Do you visit your dentisit regularly (minimum 1 to 2 times a year)?	no, yes
mother_health_dental_health_p18	Overall, how would you rate the health of your teeth and gums?	1_excellent, 2_very_good, 3_good, 4_average, 5_bad
mother_health_bleeding_gums_p18	Did you suffer from bleeding gums before and/or during your pregnancy?	no, yes
mother_food_pref_avoid
mother_food_avoid_gluten_preg	Do you avoid gluten during your pregnancy (P12 and P32)?	no, yes
mother_food_avoid_dairy_preg	Do you avoid dairy during your pregnancy (P12 and P32)?	no, yes
mother_food_pref_broccoli_preg	Do you have a preference for broccoli during your pregnancy (P12 and P32)?	[numeric]
mother_food_pref_crisps_preg	Do you have a preference for crisps during your pregnancy (P12 and P32)?	[numeric]
mother_food_pref_bacon_preg	Do you have a preference for bacon during your pregnancy (P12 and P32)?	[numeric]
mother_food_pref_shrimps_preg	Do you have a preference for shrimps during your pregnancy (P12 and P32)?	[numeric]
mother_food_pref_butter_preg	Do you have a preference for butter during your pregnancy (P12 and P32)?	[numeric]
mother_food_pref_fries_preg	Do you have a preference for fries during your pregnancy (P12 and P32)?	[numeric]
mother_food_pref_wholegrain_bread_preg	Do you have a preference for whole grain bread during your pregnancy (P12 and P32)?	[numeric]
mother_food_pref_blue_cheese_preg	Do you have a preference for blue cheese during your pregnancy (P12 and P32)?	[numeric]
mother_food_pref_skimmed_milk_preg	Do you have a preference for skimmed milk during your pregnancy (P12 and P32)?	[numeric]
mother_food_pref_fresh_tomatoes_preg	Do you have a preference for tomatoes during your pregnancy (P12 and P32)?	[numeric]
mother_food_pref_black_coffee_preg	Do you have a preference for coffee during your pregnancy (P12 and P32)?	[numeric]
mother_food_pref_pizza_preg	Do you have a preference for pizza during your pregnancy (P12 and P32)?	[numeric]
mother_food_pref_plain_yoghurt_preg	Do you have a preference for plain yoghurt during your pregnancy (P12 and P32)?	[numeric]
mother_food_pref_fried_chicken_preg	Do you have a preference for fried chicken during your pregnancy (P12 and P32)?	[numeric]
mother_food_pref_spicy_food_preg	Do you have a preference for spicy food during your pregnancy (P12 and P32)?	[numeric]
mother_food_pref_bread_preg	Do you have a preference for bread during your pregnancy (P12 and P32)?	[numeric]
mother_food_pref_sausages_preg	Do you have a preference for sausages during your pregnancy (P12 and P32)?	[numeric]
mother_food_pref_soy_sauce_preg	Do you have a preference for soy sauce during your pregnancy (P12 and P32)?	[numeric]
mother_food_pref_carbonated_or_sweet_drinks_preg	Do you have a preference for carbonated or sweet drinks during your pregnancy (P12 and P32)?	[numeric]
mother_food_pref_salty_pretzels_preg	Do you have a preference for salty pretzels during your pregnancy (P12 and P32)?	[numeric]
mother_food_pref_fresh_coriander_preg	Do you have a preference for coriander during your pregnancy (P12 and P32)?	[numeric]
mother_food_pref_pasta_noodles_preg	Do you have a preference for pasta or noodles during your pregnancy (P12 and P32)?	[numeric]
mother_food_pref_mayonnaise_preg	Do you have a preference for mayonnaise during your pregnancy (P12 and P32)?	[numeric]
mother_food_pref_chile_pepper_preg	Do you have a preference for chile pepper during your pregnancy (P12 and P32)?	[numeric]
mother_food_pref_whole_milk_preg	Do you have a preference for whole milk during your pregnancy (P12 and P32)?	[numeric]
mother_food_pref_roasted_chicken_preg	Do you have a preference for roasted chicken during your pregnancy (P12 and P32)?	[numeric]
mother_food_pref_olives_preg	Do you have a preference for olives during your pregnancy (P12 and P32)?	[numeric]
mother_food_pref_dark_chocolate_preg	Do you have a preference for dark chocolate during your pregnancy (P12 and P32)?	[numeric]
mother_food_pref_garlic_preg	Do you have a preference for garlic during your pregnancy (P12 and P32)?	[numeric]
mother_food_pref_ketchup_preg	Do you have a preference for ketchup during your pregnancy (P12 and P32)?	[numeric]
mother_food_pref_ice_cream_preg	Do you have a preference for ice-cream during your pregnancy (P12 and P32)?	[numeric]
mother_food_pref_grapefruit_preg	Do you have a preference for grapefruit during your pregnancy (P12 and P32)?	[numeric]
mother_food_pref_cereal_preg	Do you have a preference for cereal during your pregnancy (P12 and P32)?	[numeric]
mother_food_pref_white_rice_preg	Do you have a preference for white rice during your pregnancy (P12 and P32)?	[numeric]
mother_food_pref_salad_dressing_preg	Do you have a preference for salad dressing during your pregnancy (P12 and P32)?	[numeric]
mother_food_pref_fried_fish_preg	Do you have a preference for fried fish during your pregnancy (P12 and P32)?	[numeric]
mother_food_pref_banana_preg	Do you have a preference for banana during your pregnancy (P12 and P32)?	[numeric]
mother_food_pref_pork_chop_preg	Do you have a preference for pork chop during your pregnancy (P12 and P32)?	[numeric]
mother_food_pref_lentils_beans_preg	Do you have a preference for lentil beans during your pregnancy (P12 and P32)?	[numeric]
mother_food_pref_red_wine_preg	Do you have a preference for red wine during your pregnancy (P12 and P32)?	[numeric]
mother_food_pref_pear_preg	Do you have a preference for pear during your pregnancy (P12 and P32)?	[numeric]
mother_food_pref_glaze_preg	Do you have a preference for glaze during your pregnancy (P12 and P32)?	[numeric]
mother_food_pref_potato_preg	Do you have a preference for potato during your pregnancy (P12 and P32)?	[numeric]
mother_food_pref_melon_yellow_or_green_preg	Do you have a preference for yellow or green melon during your pregnancy (P12 and P32)?	[numeric]
mother_food_pref_sauted_mushrooms_preg	Do you have a preference for sauted mushrooms during your pregnancy (P12 and P32)?	[numeric]
mother_food_pref_olive_oil_preg	Do you have a preference for olive oil during your pregnancy (P12 and P32)?	[numeric]
mother_food_pref_asparagus_preg	Do you have a preference for asparagus during your pregnancy (P12 and P32)?	[numeric]
mother_food_pref_raw_carrot_preg	Do you have a preference for raw carrot during your pregnancy (P12 and P32)?	[numeric]
mother_food_pref_jam_preg	Do you have a preference for jam during your pregnancy (P12 and P32)?	[numeric]
mother_food_pref_white_wine_preg	Do you have a preference for white wine during your pregnancy (P12 and P32)?	[numeric]
mother_food_pref_lemon_preg	Do you have a preference for lemon during your pregnancy (P12 and P32)?	[numeric]
mother_food_pref_oatmeal_preg	Do you have a preference for oatmeal during your pregnancy (P12 and P32)?	[numeric]
mother_food_pref_cherries_preg	Do you have a preference for cherries during your pregnancy (P12 and P32)?	[numeric]
mother_food_pref_vinegar_preg	Do you have a preference for vinegar during your pregnancy (P12 and P32)?	[numeric]
mother_food_pref_coffee_tea_with_sugar_preg	Do you have a preference for coffee or tea with sugar during your pregnancy (P12 and P32)?	[numeric]
mother_food_pref_beetroot_preg	Do you have a preference for beetroot during your pregnancy (P12 and P32)?	[numeric]
mother_food_pref_wasabi_horseradish_preg	Do you have a preference for wasabi or horseradish during your pregnancy (P12 and P32)?	[numeric]
mother_food_pref_tuna_or_salmon_preg	Do you have a preference for tuna or salmon during your pregnancy (P12 and P32)?	[numeric]
mother_food_pref_cookies_pastry_preg	Do you have a preference for cookies or pastries during your pregnancy (P12 and P32)?	[numeric]
mother_food_pref_ham_preg	Do you have a preference for ham during your pregnancy (P12 and P32)?	[numeric]
mother_food_pref_granola_bar_preg	Do you have a preference for granola bar during your pregnancy (P12 and P32)?	[numeric]
mother_food_pref_strawberries_preg	Do you have a preference for strawberries during your pregnancy (P12 and P32)?	[numeric]
mother_food_pref_saltines_preg	Do you have a preference for saltines during your pregnancy (P12 and P32)?	[numeric]
mother_food_pref_pickles_preg	Do you have a preference for pickes during your pregnancy (P12 and P32)?	[numeric]
mother_food_pref_spinach_vegetables_preg	Do you have a preference for spinach or vegetables during your pregnancy (P12 and P32)?	[numeric]
mother_food_pref_pineapple_preg	Do you have a preference for pineapple during your pregnancy (P12 and P32)?	[numeric]
mother_food_pref_hot_tea_preg	Do you have a preference for hot tea during your pregnancy (P12 and P32)?	[numeric]
mother_food_pref_cheesecake_preg	Do you have a preference for cheese cake during your pregnancy (P12 and P32)?	[numeric]
mother_food_pref_add_salt_to_food_preg	Do you have a preference for adding salt to your food during your pregnancy (P12 and P32)?	[numeric]
mother_food_pref_bbq_meat_preg	Do you have a preference for BBQ meat during your pregnancy (P12 and P32)?	[numeric]
mother_food_pref_eggplant_preg	Do you have a preference for eggplant during your pregnancy (P12 and P32)?	[numeric]
mother_food_pref_cheddar_cheese_preg	Do you have a preference for cheddar during your pregnancy (P12 and P32)?	[numeric]
mother_food_pref_tabasco_sauce_preg	Do you have a preference for tabasco sauce during your pregnancy (P12 and P32)?	[numeric]
mother_food_pref_raw_onion_preg	Do you have a preference for raw onion during your pregnancy (P12 and P32)?	[numeric]
mother_food_pref_orange_juice_preg	Do you have a preference for orange juice during your pregnancy (P12 and P32)?	[numeric]
mother_food_pref_sweet_coffee_drinks_with_whipped_cream_preg	Do you have a preference for sweet coffee drinks with whipped cream during your pregnancy (P12 and P32)?	[numeric]
mother_food_pref_black_pepper_preg	Do you have a preference for black pepper during your pregnancy (P12 and P32)?	[numeric]
mother_food_pref_artificial_meat_products_preg	Do you have a preference for artificial meat during your pregnancy (P12 and P32)?	[numeric]
mother_food_pref_indian_food_preg	Do you have a preference for indian food during your pregnancy (P12 and P32)?	[numeric]
mother_food_pref_dietary_drinks_preg	Do you have a preference for dietary drinks during your pregnancy (P12 and P32)?	[numeric]
mother_food_pref_unsalted_peanuts_preg	Do you have a preference for unsalted peanuts during your pregnancy (P12 and P32)?	[numeric]
mother_food_pref_steak_preg	Do you have a preference for steak during your pregnancy (P12 and P32)?	[numeric]
mother_food_pref_eggs_preg	Do you have a preference for eggs during your pregnancy (P12 and P32)?	[numeric]
mother_food_pref_soya_milk_preg	Do you have a preference for soya milk during your pregnancy (P12 and P32)?	[numeric]
mother_food_pref_sweeteners_in_coffee_tea_preg	Do you have a preference for sweeteners in coffee or tea during your pregnancy (P12 and P32)?	[numeric]
birthcards_delivery_questionniares
mother_delivery_within_month_hosp	Were you admitted to hospital again within a month after the birth?	no, yes
infant_delivery_within_month_hosp	Were you admitted to hospital again within a month after the birth, because of a health problem related to your baby?	no, yes
mother_delivery_within_month_hosp_bloodloss	Were you admitted to hospital again within a month after the birth due to blood loss?	no, yes
birth_deliverybirthcard_mode_binary	What was the mode of delivery?	CS (c-section), VG (vaginal)
birth_delivery_mode_simple	How was your baby delivered?	post_labor_CS, pre_labor_CS, VG
birth_delivery_mode_complex	How was your baby delivered?	induction_emergency_CS, induction_vaccum_VG, induction_VG, planned_CS, pre_labor_emergency_CS, spon_contrac_emergency_CS, spon_contrac_vaccum_VG, spon_contrac_VG
mother_deliverybirthcard_del_induced_balloon	Was your delivery induced with a balloon?	no, yes
mother_deliverybirthcard_del_induced_IV_drip	Was your delivery induced with an IV drip infusion?	no, yes
mother_deliverybirthcard_del_induced_breaking_membrane	Was your delivery induced by breaking the (amniotic) membrane?	no, yes
mother_deliverybirthcard_del_induced_labour_IV_contraction_inducers	Did you receive contraction inducers via an IV during childbirth?	no, yes
mother_delivery_del_pain_IV_pump_remifentanyl	Did you receive pain-relieving medication after delivery? Namely, infusion with a pump where you can determine the dosage (of remifentanyl)	no, yes
mother_geneticsbirthcard_blood_group	What is the blood group of the mother (from both genetics and birthcard data)?	A, AB, B, O
mother_geneticsbirthcard_blood_group_genotype	What is the mother's genoytpe (from both genetics and birthcard data)?	A/A, A/B, A/O, B/B, B/O, O/O
mother_birthcard_rhesus_d_factor	Is the mother's Rhesus D factor positive or negative?	negative, positive
mother_birthcardhealth_smoking_during_pregnancy	Did the mother smoke during pregnancy?	no, stopped, yes
mother_birthcard_type_twin	What type of twins did the mother deliver?	BCBA, MCBA
mother_birthcard_preg_weight_gain_kg	How much weight did the mother gain during pregnancy?	[numeric]
mother_birthcard_med_preg_antemetics_antinausea_R06A	Did the mother receive antemetics or antinausea medication during pregnancy?	no, yes
mother_birthcard_infectious_disease_preg_HSV	Was the mother infected with the Herpes Simplex virus druing pregnancy?	no, yes
mother_birthcard_infectious_disease_preg_GBS	Was the mother infected with a Group B Streptococcus infection during pregnancy?	no, yes
mother_birthcardself_gestational_age_weeks	What was the gestational age in weeks? (derived from clinical and self-reported data)	[numeric]
mother_birthcardself_gestational_age_catg	What was the gestational age, defined by categories? (derived from clinical and self-reported data)	1_very_preterm (=<32 weeks), 2_moderate_preterm (32 - <36.9 weeks), 3_term (=>36.9 - <41.9 weeks) , 4_post_term (=>41.9 weeks)
mother_birthcard_parity	How many live births has the mother previously delivered?	[numeric]
mother_birthcardhealth_gravidity	How many pregnancies has the mother had (irrespective of number of live births)?	[numeric]
mother_birthcard_water_spontaneously_broken	Did the mother's water break spontaneously?	no, yes
mother_birthcard_duration_water_broken_min	What was the duration of the mother's water breaking until delivery, in minutes?	[numeric]
mother_birthcard_duration_water_broken_hrs	What was the duration of the mother's water breaking until delivery, in hours?	[numeric]
mother_deliverybirthcard_med_del_epidural	Did the mother receive an epidural during delivery?	no, yes
mother_birthcard_med_del_spinal	Did the mother receive spinal medication during delivery?	no, yes
mother_birthcard_med_del_oxytocin_ana_H01BB	Did the mother receive oxytocin during delivery?	no, yes
mother_birthcard_med_del_anaesthetic_opioid_N01AH	Did the mother receive anaesthetics/opiods during delivery?	no, yes
mother_birthcard_del_vacuum_pump	Was a vacuum pump used during delivery?	no, yes
mother_birthcard_del_rupture	Did the mother experience a (uterine) rupture during delivery?	no, yes
mother_birthcard_del_rupture_grade	What grade of (uterine) rupture did the mother experience during delivery?	0, 1, 2, 3 (includes 3, 3a and 3b), 4
mother_birthcard_del_complications_long_labor_O63	Did the mother experience complications of long labour?	no, yes
birth_deliverybirthcard_place_delivery_simple	Where did the delivery take place?	home, hospital
birth_birthcard_place_delivery_complex	Where did they delivery take place?	home, hospital, hospitalPK
birth_birthcard_place_delivery_hospital	At which hospital did the mother deliver?	Assen, Groningen_academic, Groningen_peripheral, other
infant_birthcard_rhesus_factor	Is the infant's Rhesus factor positive or negative?	negative, positive
infant_birthcard_apgar_score_1min	What was the infant's APGAR score 1 min after delivery?	[numeric]
infant_birthcard_apgar_score_5min	What was the infant's APGAR score 5 min after delivery?	[numeric]
infant_birthcard_apgar_score_10min	What was the infant's APGAR score 10 min after delivery?	[numeric]
birth_birthcard_total_duration_delivery_min	What was the total duration of delivery, in minutes?	[numeric]
birth_birthcard_duration_active_deliberate_pushing_min	What was the duration of active deliberate pushing during delivery, in minutes?	[numeric]
infant_birthcard_feeding_mode_after_birth	What type of feeding did the infant receive after delivery?	BF (breast fed), MF (mixed fed), FF (formula)
infant_birthcard_breech	Was the infant breech?	no, yes
infant_birthcard_position_birth	In what position was the infant born?	occiput_anterior, occiput_posterior
infant_birthcard_hospital_stay_after_birth_hrs	How many hours after birth did the infant stay in the hospital for?	1_<5_hrs, 2_5_to_10_hrs, 3_10_to_24_hrs, 4_24_48_hrs, 5_>72_hrs
infant_birthcard_paediatrician_called	Was the Pediatrician called?	no, yes
infant_birthcard_warmth_therapy	Did the infant receive warmth therapy?	no, yes
infant_birthcard_light_therapy	Did the infant receive light therapy?	no, yes
infant_birthcard_med_antibiotics_T195_J01CA_B	Did the infant receive antibiotics at birth?	no, yes
infant_birthcard_comp_large_gestational_age_P08.1	Was the infant born large for gestational age?	no, yes
infant_birthcard_comp_pre_term_O60	Was the infant born pre-term?	no, yes
mother_deliveryhealth_preg_complaint_flu_rti	Did you have a flu/respiratory tract infection during your pregnancy?	no, yes
mother_deliveryhealth_preg_complaint_gastroenteritis	Did you have a gastro-enteritis during your pregnancy?	no, yes
mother_deliveryhealth_preg_complaint_uti	Did you have a urinary tract infection during your pregnancy?	no, yes
mother_deliveryhealth_preg_complaint_vaginal_fungal_inf	Did you have a vaginal fungal infection during your pregnancy?	no, yes
mother_deliverybirthcard_preg_comp_preeclampsia	Did you have preeclampsia during your pregnancy?	no, yes
mother_deliverybirthcard_preg_comp_hypertension	Did you have hypertention during your pregnancy?	no, yes
mother_deliverybirthcard_preg_comp_GDM	Did you have gestational diabetes?	no, yes
mother_deliverybirthcardhealth_preg_complaint_hyperemesis_gravidarum	Did you have hyperemesis gravidarum (severe morning sickness) during your pregnancy?	no, yes
mother_deliverybirthcard_preg_comp_cholestasis	Did you have cholestasis during your pregnancy?	no, yes
infant_deliverybirthcard_meconium_amniotic_fluid	Did the infant release meconium into the amniotic fluid?	no, yes
mother_deliverybirthcard_prolonged_rupture_membranes	Did the mother experience prolonged rupture (>24hrs) of membranes (water breaking)?	no, yes
mother_birthcard_age_at_delivery	What was the age of the mother at delivery?	[numeric]
infant_misc_sex	What is the sex of the infant?	female, male
mother_post_pregnancy
mother_ffq
mother_ffq_aMED_score	Alternative Mediterranean (aMED) diet quality score	[numeric]
mother_ffq_energy_kcal_m2	Total energy in kcal per day	[numeric]
mother_ffq_group_alcohol_ml_per_day_m2	Food group: alcohol intake in ml per day	[numeric]
mother_ffq_group_cereals_grams_per_day_m2	Food group: cereals intake in grams per day	[numeric]
mother_ffq_group_cheese_grams_per_day_m2	Food group: cheese intake in grams per day	[numeric]
mother_ffq_group_coffee_ml_per_day_m2	Food group: coffee intake in ml per day	[numeric]
mother_ffq_group_dairy_grams_per_day_m2	Food group: dairy intake in grams per day	[numeric]
mother_ffq_group_eggs_grams_per_day_m2	Food group: eggs intake in grams per day	[numeric]
mother_ffq_group_fats_and_oils_grams_per_day_m2	Food group: fats and oils intake in grams per day	[numeric]
mother_ffq_group_fish_seafood_grams_per_day_m2	Food group: seafood intake in grams per day	[numeric]
mother_ffq_group_fruits_grams_per_day_m2	Food group: fruits intake in grams per day	[numeric]
mother_ffq_group_legumes_grams_per_day_m2	Food group: legumes intake in grams per day	[numeric]
mother_ffq_group_meat_grams_per_day_m2	Food group: meat intake in grams per day	[numeric]
mother_ffq_group_meat_substitute_grams_per_day_m2	Food group: meat substitutes intake in grams per day	[numeric]
mother_ffq_group_nonrefined_high_fiber_breads_grams_per_day_m2	Food group: non-refined high fiber breads intake in grams per day	[numeric]
mother_ffq_group_nuts_and_seeds_grams_per_day_m2	Food group: nuts and seeds intake in grams per day	[numeric]
mother_ffq_group_pasta_grams_per_day_m2	Food group: pasta intake in grams per day	[numeric]
mother_ffq_group_pastry_grams_per_day_m2	Food group: pastry intake in grams per day	[numeric]
mother_ffq_group_potatoes_grams_per_day_m2	Food group: potatoes intake in grams per day	[numeric]
mother_ffq_group_prepared_meal_grams_per_day_m2	Food group: prepared meal intake in grams per day	[numeric]
mother_ffq_group_refined_white_breads_grams_per_day_m2	Food group: refined white breads intake in grams per day	[numeric]
mother_ffq_group_rice_grams_per_day_m2	Food group: rice intake in grams per day	[numeric]
mother_ffq_group_sandwich_fillers_grams_per_day_m2	Food group: sandwich fillers intake in grams per day	[numeric]
mother_ffq_group_sauces_condiments_grams_per_day_m2	Food group: condiments intake in grams per day	[numeric]
mother_ffq_group_savoury_snacks_grams_per_day_m2	Food group: savoury snacks intake in grams per day	[numeric]
mother_ffq_group_sugar_sweets_grams_per_day_m2	Food group: sweets intake in grams per day	[numeric]
mother_ffq_group_sweet_drinks_and_no_or_low_alc_drinks_ml_per_day_m2	Food group: sweet drinks and no or low alcoholic drinks intake in ml per day	[numeric]
mother_ffq_group_tea_ml_per_day_m2	Food group: tea intake in grams per day	[numeric]
mother_ffq_group_vegetables_grams_per_day_m2	Food group: vegetables intake in grams per day	[numeric]
mother_ffq_group_water_ml_per_day_m2	Food group: water intake in grams per day	[numeric]
mother_ffq_nutrients_ALA_m2	Nutrients: alpha-Linolenic acid (ALA; omega-3 fatty acid) intake in grams per day	[numeric]
mother_ffq_nutrients_alcohol_total_m2	Nutrients: alcohol intake in grams per day	[numeric]
mother_ffq_nutrients_beta_carotene_m2	Nutrients: betacarotene intake in grams per day	[numeric]
mother_ffq_nutrients_calcium_m2	Nutrients: calcium intake in grams per day	[numeric]
mother_ffq_nutrients_cholesterol_m2	Nutrients: cholesterol intake in grams per day	[numeric]
mother_ffq_nutrients_DHA_m2	Nutrients: Docosahexaenoic acid (DHA; omega-3 fatty acid) intake in grams per day	[numeric]
mother_ffq_nutrients_protein_animal_m2	Nutrients: animal protein intake in grams per day	[numeric]
mother_ffq_nutrients_fatty_acids_total_monounsaturated_m2	Nutrients: total monounsaturated fatty acid intake in grams per day	[numeric]
mother_ffq_nutrients_EPA_m2	Nutrients: Eicosapentaenoic acid (EPA; omega-3 fatty acid) intake in grams per day	[numeric]
mother_ffq_nutrients_dietary_folate_equivalents_m2	Nutrients: dietary folate equivalents intake in grams per day	[numeric]
mother_ffq_nutrients_folic_acid_m2	Nutrients: folic acid intake in grams per day	[numeric]
mother_ffq_nutrients_iron_haem_m2	Nutrients: heme-iron (found in animal flesh) intake in grams per day	[numeric]
mother_ffq_nutrients_iron_non_haem_m2	Nutrients: non-heme-iron (found in plant foods) intake in grams per day	[numeric]
mother_ffq_nutrients_potassium_m2	Nutrients: potassium intake in grams per day	[numeric]
mother_ffq_nutrients_linoleic_acid_m2	Nutrients: linoleic acid intake in grams per day	[numeric]
mother_ffq_nutrients_lycopene_m2	Nutrients: lycopene intake in grams per day	[numeric]
mother_ffq_nutrients_magnesium_m2	Nutrients: magnesium intake in grams per day	[numeric]
mother_ffq_nutrients_fatty_acids_total_polyunsaturated_m2	Nutrients: total polyunsaturated fatty acid intake in grams per day	[numeric]
mother_ffq_nutrients_protein_vegetable_m2	Nutrients: vegetable protein intake in grams per day	[numeric]
mother_ffq_nutrients_polysaccharides_total_m2	Nutrients: polysaccharides intake in grams per day	[numeric]
mother_ffq_nutrients_retinol_m2	Nutrients: retinol intake in grams per day	[numeric]
mother_ffq_nutrients_retinol_activity_equivalents_m2	Nutrients: retinol activity equivalents intake in grams per day	[numeric]
mother_ffq_nutrients_protein_total_m2	Nutrients: total protein intake in grams per day	[numeric]
mother_ffq_nutrients_iron_total_m2	Nutrients: iron intake in grams per day	[numeric]
mother_ffq_nutrients_carbohydrates_total_m2	Nutrients: total carbohydrate intake in grams per day	[numeric]
mother_ffq_nutrients_mono_and_disaccharides_total_m2	Nutrients: total mono- and disaccharides intake in grams per day	[numeric]
mother_ffq_nutrients_fat_total_m2	Nutrients: total fat intake in grams per day	[numeric]
mother_ffq_nutrients_fatty_acids_total_trans_m2	Nutrients: total trans fatty acid intake in grams per day	[numeric]
mother_ffq_nutrients_fatty_acids_total_saturated_m2	Nutrients: total saturated fatty acid intake in grams per day	[numeric]
mother_ffq_nutrients_vitamin_B1_m2	Nutrients: vitamin B1 intake in grams per day	[numeric]
mother_ffq_nutrients_vitamin_B12_m2	Nutrients: vitamin B12 intake in grams per day	[numeric]
mother_ffq_nutrients_vitamin_B2_m2	Nutrients: vitamin B2 intake in grams per day	[numeric]
mother_ffq_nutrients_vitamin_B6_m2	Nutrients: vitamin B6 intake in grams per day	[numeric]
mother_ffq_nutrients_vitamin_C_m2	Nutrients: vitamin C intake in grams per day	[numeric]
mother_ffq_nutrients_vitamin_D_m2	Nutrients: vitamin D intake in grams per day	[numeric]
mother_ffq_nutrients_vitamin_E_m2	Nutrients: vitamin E intake in grams per day	[numeric]
mother_ffq_nutrients_dietary_fiber_total_m2	Nutrients: total dietary fiber intake in grams per day	[numeric]
mother_ffq_nutrients_water_total_m2	Nutrients: water intake in grams per day	[numeric]
mother_ffq_nutrients_zinc_m2	Nutrients: zinc intake in grams per day	[numeric]
mother_ffq_pattern_processed_foods	Mother dietary pattern of processed foods	[numeric]
mother_ffq_pattern_vegetarian_foods	Mother dietary patterns of vegetarian foods	[numeric]
mother_ffq_pattern_pescatarian_asian_foods	Mother dietary patterns of pescatarian and Asian foods	[numeric]
mother_ffq_pattern_meat_and_fat	Mother dietary patterns of meat and fat	[numeric]
mother_ffq_pattern_dairy_pancakes_crackers_sauce	Mother dietary patterns of dairy, pancakes, crackers and red sauce	[numeric]
mother_ffq_pattern_snacks_and_alcoholic_drinks	Mother dietary patters of snacks (Dutch borrel) and alcoholic drinks	[numeric]
mother_ffq_pattern_dutch_foods	Mother dietary patterns of Dutch foods	[numeric]
mother_ffq_pattern_breakfast_foods	Mother dietary patterns of breaskfast foods in general	[numeric]
mother_ffq_pattern_eggs_other_meats_white_wine	Mother dietary patterns of eggs, other meats and white wine	[numeric]
mother_ffq_pattern_dutch_breakfast	Mother dietary pattern of Dutch breakfast foods	[numeric]
family_exposures
family_pets_any	Do you have any pets (inclusive of cats, dogs, birds, rabbits and other animals)?	no, yes
family_pets_cat	If you have pets, do you have a cat(s)?	no, yes
family_pets_dog	If you have pets, do you have a dog(s)?	no, yes
family_living_situation	What is your current living situation?	farm, flat, house, other
infant
infant_health
infant_health_food_allergy	Did your infant experience any food allergies in their first year of life?	no, yes
infant_health_food_allergy_cowmilk	Did your infant experience any cow's milk allergies in their first year of life?	no, yes
infant_health_food_allergy_egg	Did your infant experience any egg allergies in their first year of life?	no, yes
infant_health_eczema_diagnosis_relaxed	Did your infant have eczema in their first year of life (case criteria: questionnaire/called parents, medication use and scorad score; control criteria: complemented with cleaned questionnaire data)?	no ,yes
infant_health_eczema_diagnosis_strict	Did your infant have eczema in their first year of life (criteria: questionnaire/called parents, medication use and scorad score)?	no, yes
infant_health_impetigo	Did your infant have impetigo in their first year of life?	no, yes
infant_health_itchy_skin_rash	Did your infant have itchy skin or a skin rash in their first year of life?	no, yes
infant_health_constipation	Did your infant have any constipation in their first year of life?	no, yes
infant_health_abdominal_cramps	Did your infant have any abdominal cramps in their first year of life?	no, yes
infant_health_reflux	Did your infant have any reflux in their first year of life?	no, yes
infant_health_vomiting_m4	Did your infant vomit within the first 4 months of life?	no, yes
infant_health_doctor_diarrhea_m4	Did you ever visit a general practitioner or specialist because your infant had diarrheal complaints, within the first 4 months of life?	no, yes
infant_health_thrush_m4	Did your infant have thrush within the first 4 months of life?	no, yes
infant_health_nose_problems_eye_irritation	Did your infant have any nose problems or eye irritation in their first year of life?	no, yes
infant_health_ear_infection	Did your infant have any ear infections in their first year of life?	no, yes
infant_health_airway_infections	Did your infant have any airway infections in their first year of life?	no, yes
infant_health_breathing_difficulties	Did your infant struggle with any breathing difficulties (wheezing, rumbling breath or shortness of breath) in their first year of life?	no, yes
infant_health_airway_nose_ear_throat_infection_freq	How frequently did your infant have an airway or ear, nose or throat infection, in their first year of life?	0_never, 1_once_twice, 2_three_to_five, 3_six_times_more
infant_health_chicken_pox	Did your infant have chicken pox in their first year of life?	no, yes
infant_scorad_family_history_allergic_disease	Is there a history of allergic diseases in your family?	no, yes
infant_nutrition [NOTE: dietary patterns derived by Factor Analysis are referred to as F1-F5, while those derive by Latent Profile Analysis (LPA) are referred to as clusters]
infant_ffq_ever_never_breastfed	Has your infant ever been breastfed in their first year of life?	ever_BF, never_BF
infant_ffq_f1_veg_potatoes_m6	Infant dietary pattern factor 1 (F1) at 6 months: vegetable and potato intake	[numeric]
infant_ffq_f2_fruits_m6	Infant dietary pattern F2 at 6 months: fruit intake	[numeric]
infant_ffq_f3_tea_cheese_sweet_spreads_m6	Infant dietary pattern F3 at 6 months: tea, cheese and sweet spreads intake	[numeric]
infant_ffq_f4_fats_oils_nut_butters_m6	Infant dietary pattern F4 at 6 months: fats and oils, and nut butter intake	[numeric]
infant_ffq_f5_pasta_juice_meat_m6	Infant dietary pattern F5 at 6 months: pasta, juice and meat intake	[numeric]
infant_ffq_energy_kcal_recal_m6	Infant energy in kcal per day at 6 months (correction determinant for dietary patterns at 6 months)	[numeric]
infant_ffq_f1_sweet_desserts_m9	Infant dietary pattern F1 at 9 months: sweet dessert intake	[numeric]
infant_ffq_f2_wholegrain_bread_fats_oils_spreads_m9	Infant dietary pattern F2 at 9 months: whole grain bread, fats and oils and spreads intake	[numeric]
infant_ffq_f3_cooked_foods_m9	Infant dietary pattern F3 at 9 months: cooked foods intake	[numeric]
infant_ffq_f4_starchy_foods_legumes_m9	Infant dietary pattern F4 at 9 months: starchy foods and legumes intake	[numeric]
infant_ffq_f5_biscuits_sweet_drinks_m9	Infant dietary pattern F5 at 9 months: biscuits and sweet drinks intake	[numeric]
infant_ffq_energy_kcal_recal_m9	Infant energy in kcal per day at 9 months (correction determinant for dietary patterns at 9 months)	[numeric]
infant_ffq_f1_starchy_foods_legumes_m12	Infant dietary pattern F1 at 12 months: starchy foods and legumes intake	[numeric]
infant_ffq_f2_sweet_drinks_biscuits_pudding_m12	Infant dietary pattern F2 at 12 months: sweet drinks, biscuits and pudding intake	[numeric]
infant_ffq_f3_juice_dairy_drinks_m12	Infant dietary pattern F3 at 12 months: juice and dairy drinks intake	[numeric]
infant_ffq_f4_sweet_desserts_m12	Infant dietary pattern F4 at 12 months: sweet desserts intake	[numeric]
infant_ffq_f5_protein_fats_oils_m12	Infant dietary pattern F5 at 12 months: protein and fats and oils intake	[numeric]
infant_ffq_energy_kcal_recal_m12	Infant energy in kcal per day at 12 months (correction determinant for dietary patterns at 12 months)	[numeric]
infant_ffq_cluster_kcal_m6	Infant cluster derived by LPA analysis from food groups in units of caloric intake (kcal/day) at 6 months	1_carbohydrates_fruit_vegetables_diverse, 2_carbohydrates_fruit_vegetables_only
infant_ffq_cluster_kcal_m9	Infant cluster derived by LPA analysis from food groups in units of caloric intake (kcal/day) at 9 months	1_higher_carbohydrates_sweets_fats_and_oils, 2_lower_carbohydrates_sweets_fats_and_oils
infant_ffq_cluster_kcal_m12	Infant cluster derived by LPA analysis from food groups in units of caloric intake (kcal/day) at 12 months	1_higher_carbohydrates_sweets_fats_and_oils, 2_lower_carbohydrates_sweets_fats_and_oils
infant_ffq_cluster_gday_m6	Infant cluster derived by LPA analysis from food groups in units of grams per day at 6 months	1_fruit_and_vegetables_diverse, 2_fruit_and_vegetables_only
infant_ffq_cluster_gday_m9	Infant cluster derived by LPA analysis from food groups in units of grams per day at 6 months	1_higher_dairy_sugar_and_drinks, 2_lower_dairy_sugar_and_drinks
infant_ffq_cluster_gday_m12	Infant cluster derived by LPA analysis from food groups in units of grams per day at 6 months	1_higher_dairy_and_sweetened_drinks, 2_lower_dairy_and_sweetened_drinks
infant_growth
infant_growth_birth_weight_kg	Infant's birth weight (in kg)	[numeric]
infant_growth_birth_length_cm	Infant's birth length (in cm)	[numeric]
infant_growth_birth_head_circumf_cm	Infant's birth head circumference (in cm)	[numeric]
infant_growth_standardized_weight_slope_kg	Infant's rate of weight growth in relation to the population weight growth, in the first year of life	[numeric]
infant_growth_standardized_length_slope_cm	Infant's rate of length growth in relation to the population length growth, in the first year of life	[numeric]
infant_growth_standardized_head_circumf_slope_cm	Infant's rate of head circumference growth in relation to the population head circumference, in the first year of life	[numeric]

## Sheet: Table S2.
Table S2. Codebook of longitudinal mother and infant metadata
Phenotype	Time Point	Description	Categories (if categorical)
general_family_information
FAMILY	ALL	Family ID of families in Lifelines-NEXT	[fam_ids]
Type	ALL	An indicator fo whether the data relates to mother or infant data	mother, infant
next_id_mother	ALL	NEXT identification number of the mother	[next_ids]
next_id_infant	ALL	NEXT identification number of the mother	[next_ids]
next_id_partner	ALL	NEXT identification number of the partner	[next_ids]
infant_relations	ALL	How are the infants related to each other?	no_mother_infant_pair, singleton, twins
sibling_number	ALL	If there are siblings, which sibling was born first?	no, sibling_1, sibling_2, sibling_3, withdrawn
twin_pair	ALL	Are there infants who are twins?	no, pair_1, pair_2
SAMPLE_ID	ALL	NEXT sample identification number (NEXT identification + time point)	[next_ids_timepoint]
timepoint	ALL	Time point when data was collected	P12, P18, P28, B, W2, M1, M2, M3, M6, M9, M12
mother_infant_pregnancy_delivery
mother_pre_and_during_pregnancy_health
mother_health_preg_complaint_flu_rti	P12, P28, B	Did you have a flu/respiratory tract infection during your pregnancy?	no, yes
mother_health_preg_complaint_gastroenteritis	P12, P28, B	Did you have a gastro-enteritis during your pregnancy?	no, yes
mother_health_preg_complaint_uti	P12, P28, B	Did you have a urinary tract infection during your pregnancy?	no, yes
mother_health_preg_complaint_vaginal_fungal_inf	P12, P28, B	Did you have a vaginal fungal infection during your pregnancy?	no, yes
mother_during_and_post_pregnancy
mother_bristol_stool_scale
mother_BSS	P12, P28, B, M3	How would you describe the shapes and types of your stools?	1 (hard_lumps), 2 (lumpy_sausage), 3 (cracked_sausage), 4 (smooth_sausage), 5 (soft_blobs), 6 (fluffy_mush), 7 (watery)
mother_rome
mother_rome3_FGID_bloating	P28, M3	Diagnosis of functional bloating?	no, yes
mother_rome3_FGID_constipation	P28, M3	Diagnosis of functional constipation?	no, yes
mother_rome3_FGID_IBS	P28, M3	Diagnosis of functional irritable bowel syndrome (IBS)?	no, yes
mother_rome3_stool_freq_less_3_times_week_last_3_months	P28, M3	How frequently did you pass stool less than 3 times a week in the last 3 months?	[numeric]
mother_rome3_stool_freq_hard_last_3_months	P28, M3	How frequently did you pass hard stool in the last 3 months?	[numeric]
mother_rome3_stool_freq_watery_last_3_months	P28, M3	How frequently did you pass watery stool in the last 3 months?	[numeric]
mother_stool_diary
mother_stooldiary_abdominal_pain_avg	P28, M3	On average, how often do you experience abdominal pain within the week of stool collection?	[numeric]
mother_stooldiary_bloated_avg	P28, M3	On average, how often are you bloated within the week of stool collection?	[numeric]
mother_stooldiary_burping_avg	P28, M3	On average, how often do you burp within the week of stool collection?	[numeric]
mother_stooldiary_constipation_avg	P28, M3	On average, how often are you constipated within the week of stool collection?	[numeric]
mother_stooldiary_diarrhea_avg	P28, M3	On average, how often do you have diarrhea within the week of stool collection?	[numeric]
mother_stooldiary_flatulence_avg	P28, M3	On average, how often do you have flatulence within the week of stool collection?	[numeric]
mother_stooldiary_stool_freq_avg	P28, M3	On average, how often do you pass stool within the week of stool collection?	[numeric]
mother_stooldiary_nausea_avg	P28, M3	On average, how often do you feel nauseous within the week of stool collection?	[numeric]
mother_stooldiary_not_well_avg	P28, M3	On average, how often do you not feel well within the week of stool collection?	[numeric]
mother_medication
mother_med_analgesics_N02	P28, B, M3	Did you take analgesics?	no, yes
mother_med_antacids_A02A	P28, B, M3	Did you take antacids?	no, yes
mother_med_anti_depressants_N06A	P28, B, M3	Did you take anti-depressants?	no, yes
mother_med_anti_hemorrhoids_C05A	P28, B, M3	Did you take anti-hemorrhoids?	no, yes
mother_med_anti_thrombotic_agents_B01A	P28, B, M3	Did you take thrombotic agents?	no, yes
mother_med_antibiotics_J01	P28, B, M3	Did you take antibiotics?	no, yes
mother_med_aspirin_B01AC06	P28, B, M3	Did you take aspirin?	no, yes
mother_med_beta_lactam_antibacterials_penicillins_J01C	P28, B, M3	Did you take beta-lactam anti-bacterials or penicillins?	no, yes
mother_med_iron_preparations_B03A	P28, B, M3	Did you take iron preparations?	no, yes
mother_med_nitrofurantoin_J01XE01	P28, B, M3	Did you take nitrofurantoin?	no, yes
mother_med_osmotically_acting_laxatives_A06AD	P28, B, M3	Did you take osmotically acting laxatives?	no, yes
mother_med_propulsives_and_antinausea_A03FA_and_A04A	P28, B, M3	Did you take propulsives or anti-nausea medication?	no, yes
mother_med_proton_pump_inhibitors_A02BC01	P28, B, M3	Did you take proton-pump inhibitors?	no, yes
mother_med_sex_hormones_G03	P28, B, M3	Did you take sex hormones?	no, yes
mother_med_thyroid_prep_H03A	P28, B, M3	Did you take thyrioid preparations?	no, yes
mother_med_vit_B12_folic_acid_B03B	P28, B, M3	Did you take folic acid?	no, yes
mother_birthcard_med_iron_preparations03A	B, M3	Did the mother receive iron preparations within 3 months after delivery?	no, yes
mother_birthcard_med_oxytocin_ana_H01BB	B, M3	Did the mother receive oxytocin within 3 months after delivery?	no, yes
mother_birthcard_med_paracetamol_N02BE01	B, M3	Did the mother receive paracetamol within 3 months after delivery?	no, yes
mother_birthcard_med_uterotonics_G02A	B, M3	Did the mother receive uterotonics within 3 months after delivery?	no, yes
mother_stress_post_pregnancy
mother_ldi_stress_past_year_preg_avg	P12, P28, B, W2, M1, M2	To what extent, on average, did you experience difficulties and stress in different areas of your life, since the birth of your baby (at M1 postpartum) and within the last year?	[numeric]
mother_ldi_stress_past_year_postpartum_avg	M3, M6, M9, M12	To what extent, on average, did you experience difficulties and stress in different areas of your life, since the birth of your baby (at M10 postpartum) and within the last year?	[numeric]
infant
infant_health
infant_health_AFR_diarrhea_vomit	M3, M12	Did your infant experience an adverse reaction to food, namely, diarrhea or vomitting?	no, yes
infant_health_airway_infections	M6, M12	Did your infant have any airway infections?	no, yes
infant_health_eczema_questionnaire	M3, M6, M12	Did your infant have eczema? (questionnaire-based and not criteria-based)	no, yes
infant_health_food_allergy	M3, M6, M9, M12	Does your infant have a food allergy?	no, yes
infant_health_food_allergy_cowmilk	M3, M6, M9, M12	If your infant has a food allergy, do they have a cow's milk allergy?	no, yes
infant_health_food_allergy_egg	M9, M12	If your infant has a food allergy, do they have an egg allergy?	no, yes
infant_health_itchy_skin_rash	M3, M12	Did your infant have itchy skin or a skin rash?	no, yes
infant_health_known_health_problem	M3, M6, M9, M12	Did your infant have any health problems (NB: questionnaire-based, incl. infant health, infant ROME and infant IGSQ)?	no, yes
infant_health_wheeze	M3, M12	Did your infant struggle with any wheezing?	no, yes
infant_scorad
infant_scorad_measurement	M3, M12	SCORing Atopic Dermatitis score (obejective and subjective score)	[numeric]
infant_nutrition [NOTE: i) weighted refers to weighted frequencies, in otherwords, all frequencies were converted to their weight frequency equivalents. For example, daily intake in the past month == 1, whereas no intake == 0. ii) all gday variables were recalculated to represent gday coming only from food items and not breastmilk or formula milk, the latter of which are difficult to quantify (he…
infant_ffq_feeding_mode_simple	W2, M1, M2, M3, M6, M9, M12	Was your infant exlusively breastfed or exclusively formula fed?	excl_BF, excl_FF
infant_ffq_feeding_mode_complex	W2, M1, M2, M3, M6, M9, M12	What feeding mode did your infant receive?	BF (breastfed), MF (mixed fed), FF (formula fed)
infant_ffq_breastfeeding_freq_weighted	M6, M9 and M12	How often, in the previous month, did your infant have breastmilk?	[numeric]
infant_ffq_formula_follow_on_freq_weighted	M6, M9 and M12	How often, in the previous month, did your infant have formula milk?	[numeric]
infant_ffq_stopped_breastfeeding	W2, M1, M2, M3, M6, M9	Have you stopped breastfeeding your infant?	never_BF, no, yes
infant_ffq_vitD_quant_amount	W2, M1, M2, M3	How many vitamin D droplets do you give your infant?	[numeric]
infant_ffq_vitK_quant_amount	W2, M1, M2, M3	How many vitamin K droplets do you give your infant?	[numeric]
infant_ffq_cmpltry_food_cdc	M3, M6	Has your infant received complementary food (CDC definition: foods or drinks other than breast milk or infant formula (e.g., infant cereals, fruits, vegetables, water))	no, yes
infant_pureed_fruit_veg_intro	M6	Has your infant been introduced to pureed fruits and/or vegetables?	no, yes
infant_food_solid_intro	M6	Has your infant been introduced to solid foods?	no, yes
infant_ffq_energy_kcalday_item_sum_recal	M6, M9 and M12	Total energy in kcal per day	[numeric]
infant_ffq_gday_item_sum_recal	M6, M9 and M12	Total grams per day	[numeric]
infant_ffq_carbs_energy_perc_recal	M6, M9 and M12	Nutrients: Total carbohydrate energy percentage	[numeric]
infant_ffq_protein_energy_perc_recal	M6, M9 and M12	Nutrients: Total protein energy percentage	[numeric]
infant_ffq_fat_energy_perc_recal	M6, M9 and M12	Nutrients: Total fats energy percentage	[numeric]
infant_ffq_fiber_energy_perc_recal	M6, M9 and M12	Nutrients: Total fiber energy percentage	[numeric]
infant_ffq_group_breads_gday	M6, M9 and M12	Food group: bread intake in grams per day	[numeric]
infant_ffq_group_cheese_gday	M6, M9 and M12	Food group: cheese intake in grams per day	[numeric]
infant_ffq_group_dairy_gday	M9, M12	Food group: dairy intake in grams per day	[numeric]
infant_ffq_group_egg_gday	M6, M9 and M12	Food group: egg intake in grams per day	[numeric]
infant_ffq_group_fats_and_oils_gday	M6, M9 and M12	Food group: fats and oils intake in grams per day	[numeric]
infant_ffq_group_fish_gday	M6, M9 and M12	Food group: fish intake in grams per day	[numeric]
infant_ffq_group_fruits_gday	M6, M9 and M12	Food group: fruits intake in grams per day	[numeric]
infant_ffq_group_grain_products_and_rice_gday	M6, M9 and M12	Food group: grain products and rice intake in grams per day	[numeric]
infant_ffq_group_legumes_gday	M6, M9 and M12	Food group: legumes intake in grams per day	[numeric]
infant_ffq_group_meat_gday	M6, M9 and M12	Food group: meat intake in grams per day	[numeric]
infant_ffq_group_meat_substitute_gday	M6, M9 and M12	Food group: meat substitute intake in grams per day	[numeric]
infant_ffq_group_nuts_gday	M6, M9 and M12	Food group: nuts intake in grams per day	[numeric]
infant_ffq_group_pancake_gday	M9, M12	Food group: pancake intake in grams per day	[numeric]
infant_ffq_group_pasta_gday	M6, M9 and M12	Food group: pasta intake in grams per day	[numeric]
infant_ffq_group_pastry_gday	M9, M12	Food group: pastry intake in grams per day	[numeric]
infant_ffq_group_potatoes_gday	M9, M12	Food group: potatoes intake in grams per day	[numeric]
infant_ffq_group_savoury_snacks_gday	M6, M9 and M12	Food group: savoury snacks intake in grams per day	[numeric]
infant_ffq_group_sugar_sweets_gday	M6, M9 and M12	Food group: sugar sweets intake in grams per day	[numeric]
infant_ffq_group_sweet_drinks_gday	M6, M9 and M12	Food group: sweet drinks intake in grams per day	[numeric]
infant_ffq_group_tea_gday	M6, M9 and M12	Food group: tea intake in grams per day	[numeric]
infant_ffq_group_vegetables_gday	M6, M9 and M12	Food group: vegetable intake in grams per day	[numeric]
infant_ffq_group_water_gday	M6, M9 and M12	Food group: water intake in grams per day	[numeric]
infant_ffq_chocolate	M12	Did your infant eat chocolate?	no, yes
infant_ffq_chocolate_freq_weighted	M12	How often did your infant eat chocolate?	[numeric]
infant_ffq_custard_or_pudding	M9, M12	Did your infant eat custard or pudding?	no, yes
infant_ffq_custard_or_pudding_freq_weighted	M9, M12	How often did your infant eat custard or pudding?	[numeric]
infant_ffq_fresh_fruits	M6	Did your infant eat fresh fruits?	no, yes
infant_ffq_ice_cream	M9, M12	Did your infant eat ice-cream?	no, yes
infant_ffq_ice_cream_freq_weighted	M9, M12	How often did your infant eat ice-cream?	[numeric]
infant_ffq_milk_buttermilk	M9, M12	Did your infant have buttermilk?	no, yes
infant_ffq_milk_buttermilk_freq_weighted	M12	How often did your infant have buttermilk?	[numeric]
infant_ffq_whipped_cream	M9, M12	Did your infant have whipped cream?	no, yes
infant_ffq_whipped_cream_freq_weighted	M12	How often did your infant have whipped cream?	[numeric]
infant_ffq_yoghurt_or_quark	M9, M12	Did your infant eat yoghurt and/or quark?	no, yes
infant_ffq_yoghurt_or_quark_freq_weighted	M9, M12	How often did your infant eat yoghurt and/or quark?	[numeric]
infant_crying_behaviour
infant_cry_prev_week_cry_more_3h_per_day	W2, M1, M2, M3, M6, M9, M12	In the past week, did your infant cry for more than 3 hours during a 24hr day?	no, yes
infant_cry_prev_week_avg_cry_time_per_day_min	W2, M1, M2, M3, M6, M9, M12	In the past week, what was the average crying time, in minutes, of your infant per day?	[numeric]
infant_growth
infant_growth_weight_kg	B, W2, M1, M2, M3, M4, M5, M6, M9, M12	Infant weight (kg)	[numeric]
infant_growth_length_cm	B, W2, M1, M2, M3, M4, M5, M6, M9, M12	Infant length (cm)	[numeric]
infant_growth_head_circumf_cm	B, W2, M1, M2, M3, M4, M5, M6, M9, M12	Infant head circumference (cm)	[numeric]
infant_growth_bmi_kg_m2	W2, M1, M2, M3, M4, M5, M6, M9, M12	Infant BMI (kg/m2)	[numeric]
infant_growth_WFL_SDS	B, W2, M1, M2, M3, M4, M5, M6, M9, M12	Infant weight-for-length standard deviation score (WFL-SDS)	[numeric]
infant_growth_WFA_SDS	W2, M1, M2, M3, M4, M5, M6, M9, M12	Infant weight-for-age standard deviation score (WFA-SDS)	[numeric]
infant_growth_LFA_SDS	W2, M1, M2, M3, M4, M5, M6, M9, M12	Infant length-for-age standard deviation score (LFA-SDS)	[numeric]
infant_growth_HcFA_SDS	B, W2, M1, M2, M3, M4, M5, M6, M9, M12	Infant head-circumference-for-age z-score (HcFA-SDS)	[numeric]
infant_growth_BMI_SDS	W2, M1, M2, M3, M4, M5, M6, M9, M12	Infant BMI-for-age standard deviation score (BMI-SDS)	[numeric]
infant_growth_overweight	W2, M1, M2, M3, M4, M5, M6, M9, M12	Infant overweight (BMI-SDS > 2)	no, yes
infant_asq
infant_asq_com_score	M6, M12	Communication ASQ domain score	numeric (domain score ranging from 0-60)
infant_asq_com_cutoff_relaxed	M6, M12	Communication ASQ domain score dichotomized based on US population standards; M6 cut-off: 29.65, M12 cut-off: 15.64	development_delay, development_typical
infant_asq_com_cutoff_strict	M6, M12	Communication ASQ domain score dichotomized based on US population standards; M6 cut-off: 48.9 , M12 cut-off: 43.22	development_delay, development_typical
infant_asq_gm_score	M6, M12	Gross motor ASQ domain score	numeric (domain score ranging from 0-60)
infant_asq_gm_cutoff_relaxed	M6, M12	Gross motor ASQ domain score dichotomized based on US population standards; M6 cut-off: 22.25, M12 cut-off: 21.49	development_delay, development_typical
infant_asq_gm_cutoff_strict	M6, M12	Gross motor ASQ domain score dichotomized based on US population standards; M6 cut-off: 45.64, M12 cut-off: 49.92	development_delay, development_typical
infant_asq_fm_score	M6, M12	Fine motor ASQ domain score	numeric (domain score ranging from 0-60)
infant_asq_fm_cutoff_relaxed	M6, M12	Fine motor ASQ domain score dichotomized based on US population standards; M6 cut-off: 25.14, M12 cut-off: 34.50	development_delay, development_typical
infant_asq_fm_cutoff_strict	M6, M12	Fine motor ASQ domain score dichotomized based on US population standards; M6 cut-off: 48.93 , M12 cut-off: 52.22	development_delay, development_typical
infant_asq_ps_score	M6, M12	Problem solving ASQ domain score	numeric (domain score ranging from 0-60)
infant_asq_ps_cutoff_relaxed	M6, M12	Problem solving ASQ domain score dichotomized based on US population standards; M6 cut-off: 27.72, M12 cut-off: 27.32	development_delay, development_typical
infant_asq_ps_cutoff_strict	M6, M12	Problem solving ASQ domain score dichotomized based on US population standards; M6 cut-off: 50.41, M12 cut-off: 48.99	development_delay, development_typical
infant_asq_psoc_score	M6, M12	Personal social ASQ domain score	numeric (domain score ranging from 0-60)
infant_asq_psoc_cutoff_relaxed	M6, M12	Personal social ASQ domain score dichotomized based on US population standards; M6 cut-off: 25.34, M12 cut-off: 21.73	development_delay, development_typical
infant_asq_psoc_cutoff_strict	M6, M12	Personal social ASQ domain score dichotomized based on US population standards; M6 cut-off: 48.31 , M12 cut-off: 45.73	development_delay, development_typical
infant_asq_total_score	M6, M12	Total ASQ score (ASQ6, ASQ12)	numeric (domain score ranging from 0-300)
infant_rome
infant_rome_colic	M1, M2, M3	Does your infant have colic?	no, yes
infant_rome_regurgitation	M1, M2, M3, M6, M9, M12	Does your infant suffer from regurgitation, while being otherwise completely healthy?	no, yes
infant_rome_stool_freq_last_month	M1, M2, M3, M6, M9, M12	How often, in the past month, did your infant pass stool?	1 (less than once a week), 2 (1 to 2 times a week), 3 (between 3 and 7 times a week), 4 (1 time per day), 5 (2 to 3 times per day), 6 (more than 3 times per day)
infant_rome_stool_structure	M1, M2, M3, M6, M9, M12	What is the usual structure of your infants' stool?	1 (very hard), 2 (hard) 3 (not hard and not soft), 4 (very soft), 5 (watery), 6 (sometimes hard, sometimes soft)
infant_rome_mucus_stool_last_week	M1, M2, M3, M6, M9, M12	During the past month, how often has your infant had mucus (white, yellowish or stringy discharge) in their stool?	0 (never), 1 (1 time), 2 (on and off), 3 (almost always), 4 (always)
infant_rome_sudden_inconsolable_crying_fits	M1, M2, M3, M6, M9, M12	Has your child ever had sudden inconsolable crying spells, irritability and agitation for no explanation?	no, yes
infant_IGSQ
infant_IGSQ_score	M3, M12	IGSQ score represented of infant gastrointestinal distress (range: 13-65)	[numeric]
infant_IGSQ_score_catg	M3, M12	IGSQ score represented of infant gastrointestinal distress (range: 13-65) dichotomized by the population median	0_no_little_GI_distress, 1_medium_high_GI_distress
infant_BITSS
infant_BITSS	W2, M1, M2, M3, M6, M9, M12	Brussels Infant and Toddler Stool Scale	1 (hard stool), 2 (formed stool), 3 (loose stool), 4 (watery stool)
infant_medication
infant_med_acid_related_disorders_A02	W2, M1, M2, M3, M6, M9, M12	Did your infant take medications for an acid disorder?	no, yes
infant_med_analgesics_N02	W2, M1, M2, M3, M6, M9, M12	Did your infant take analgesics?	no, yes
infant_med_antibiotics_J01	W2, M1, M2, M3, M6, M9, M12	Did your infant take antiobiotics?	no, yes
infant_med_cinababy	W2, M1, M2, M3, M6, M9, M12	Did your infant take cinababy?	no, yes
infant_med_dermato_corticosteroids_D07	W2, M1, M2, M3, M6, M9, M12	Did your infant take dermatological corticosteroids?	no, yes
infant_med_dermato_miconazole	W2, M1, M2, M3, M6, M9, M12	Did your infant take miconazole?	no, yes
infant_med_infacol_simeticone_A03AX13	W2, M1, M2, M3, M6, M9, M12	Did your infant take simeticone?	no, yes
infant_med_iron_preparations_B03A	W2, M1, M2, M3, M6, M9, M12	Did your infant take iron preparations?	no, yes
infant_med_locust_bean_gum	W2, M1, M2, M3, M6, M9, M12	Did your infant take locust bean gum (for acid reflux)?	no, yes
infant_med_nystatine_A07AA02	W2, M1, M2, M3, M6, M9, M12	Did your infant take nystatine?	no, yes
infant_med_osmotically_acting_laxatives_A06AD	W2, M1, M2, M3, M6, M9, M12	Did your infant take osmotically acting laxatives?	no, yes
infant_med_probiotics	W2, M1, M2, M3, M6, M9, M12	Did your infant take probiotics?	no, yes
infant_med_vitaminD	W2, M1, M2, M3, M6, M9, M12	Did your infant take vitamin D droplets or tablets?	no, yes
infant_med_vitaminK	W2, M1, M2, M3, M6, M9, M12	Did your infant take vitamin K droplets or tablets?	no, yes
infant_sleep
infant_sleep_day_hours	M3, M6, M12	How much time, in hours, does your infant spend sleeping during the day?	[numeric]
infant_sleep_night_hours	M3, M6, M12	How much time, in hours, does your infant spend sleeping during the night?	[numeric]
infant_sleep_pattern_problem	M3, M6, M12	Do you consider your infant's sleep a problem?	0 (no problem), 1 (small problem), 2 (big problem)
infant_sleep_times_awake_night	M3, M6, M12	What is your infant's average number of night wakings per night?	[numeric]

## Sheet: Table S3.
Table S3. Summary statistics of cross-sectional, numeric metadata linked with infant gut microbiome
Phenotype	Total Sample Size, N	Percentage Total N, %	Total Missings, N	Percentage Total Missings, %	Mean	Standard Deviation	Min	Q1	Median	Q3	Max
mother_lifelinesbirthcards_prepreg_bmi_kg_m2	409	57.2829	305	42.7171	23.8829	4.05897	16.94	21.26	23.08	25.46	43.37
mother_health_smoking_duration_p18	134	18.7675	580	81.2325	11.7836	5.39752	1	8	12	15	27
mother_birthcard_preg_weight_gain_kg	47	6.58263	667	93.4174	13.0213	4.29099	5	10	13	16	21
mother_birthcardself_gestational_age_weeks	714	100	0	0	39.5332	1.63785	29.8571	38.7143	39.8571	40.7143	43
mother_birthcard_duration_water_broken_min	471	65.9664	243	34.0336	587.577	2396.15	0	68.5	249	607	49877
mother_birthcard_duration_water_broken_hrs	471	65.9664	243	34.0336	9.79296	39.9358	0	1.14167	4.15	10.1167	831.283
mother_birthcard_del_rupture_grade	435	60.9244	279	39.0756	0.875862	0.971123	0	0	1	2	4
infant_birthcard_apgar_score_1min	512	71.7087	202	28.2913	8.64453	1.22219	1	9	9	9	10
infant_birthcard_apgar_score_5min	516	72.2689	198	27.7311	9.56783	0.897273	3	9	10	10	10
infant_birthcard_apgar_score_10min	450	63.0252	264	36.9748	9.82667	0.594106	4	10	10	10	10
birth_birthcard_total_duration_delivery_min	185	25.9104	529	74.0896	403.086	285.55	46	211	322	503	1911
birth_birthcard_duration_active_deliberate_pushing_min	273	38.2353	441	61.7647	35.5641	35.8685	1	8	24	54	203
infant_birthcard_hospital_stay_after_birth_hrs	228	31.9328	486	68.0672	3.41667	1.3364	1	3	4	5	5
mother_birthcard_age_at_delivery	708	99.1597	6	0.840336	32.4322	3.91128	21	30	32	35	43
mother_ffq_aMED_score	252	35.2941	462	64.7059	3.98413	1.89141	0	3	4	5	8
mother_ffq_energy_kcal_m2	258	36.1345	456	63.8655	2191.97	587.164	670.83	1811.65	2205.72	2555.44	3926.95
mother_ffq_pattern_processed_foods	258	36.1345	456	63.8655	0.0123504	0.368475	-0.416658	-0.23288	-0.0658109	0.134599	2.00707
mother_ffq_pattern_vegetarian_foods	258	36.1345	456	63.8655	-0.0168282	0.393307	-0.73009	-0.284603	-0.0974661	0.222337	2.29856
mother_ffq_pattern_pescatarian_asian_foods	258	36.1345	456	63.8655	-0.00907379	0.463373	-0.848215	-0.367234	-0.0811533	0.280462	1.60825
mother_ffq_pattern_meat_and_fat	258	36.1345	456	63.8655	0.0199387	0.448684	-0.430672	-0.259696	-0.0612973	0.145759	4.31466
mother_ffq_pattern_dairy_pancakes_crackers_sauce	258	36.1345	456	63.8655	0.0263228	0.434796	-0.576089	-0.281446	-0.0290597	0.21786	4.08827
mother_ffq_pattern_snacks_and_alcoholic_drinks	258	36.1345	456	63.8655	0.000137548	0.249202	-0.385643	-0.17957	-0.0674101	0.12142	1.07522
mother_ffq_pattern_dutch_foods	258	36.1345	456	63.8655	-0.00883065	0.339526	-0.629563	-0.253321	-0.0382625	0.164875	1.66583
mother_ffq_pattern_breakfast_foods	258	36.1345	456	63.8655	-0.00906379	0.325473	-0.460307	-0.24913	-0.0820725	0.13336	1.51258
mother_ffq_pattern_eggs_other_meats_white_wine	258	36.1345	456	63.8655	-0.00617707	0.320664	-0.476091	-0.233169	-0.0589479	0.122853	1.54245
mother_ffq_pattern_dutch_breakfast	258	36.1345	456	63.8655	-0.0228111	0.428406	-0.431002	-0.302125	-0.1282	0.102829	3.14973
infant_ffq_f1_veg_potatoes_m6	341	47.7591	373	52.2409	61.5923	53.7566	0.0184711	18.2556	47.7637	92.8643	281.514
infant_ffq_f2_fruits_m6	341	47.7591	373	52.2409	65.6891	57.9384	0.0153661	18.7552	49.988	107.719	339.148
infant_ffq_f3_tea_cheese_sweet_spreads_m6	341	47.7591	373	52.2409	19.9485	31.7522	0.0138231	4.16628	11.0565	21.8344	306.844
infant_ffq_f4_fats_oils_nut_butters_m6	341	47.7591	373	52.2409	16.1813	16.2495	-0.00251072	4.66216	11.1731	22.7966	94.7272
infant_ffq_f5_pasta_juice_meat_m6	341	47.7591	373	52.2409	19.2752	21.1735	0.00563632	4.83434	13.3874	27.4008	196.795
infant_ffq_energy_kcal_recal_m6	342	47.8992	372	52.1008	95.9738	99.2414	0	25.3603	66.5489	133.682	576.144
infant_ffq_f1_sweet_desserts_m9	323	45.2381	391	54.7619	7.46242	10.9963	-13.2712	0.982249	4.75905	10.374	105.699
infant_ffq_f2_wholegrain_bread_fats_oils_spreads_m9	323	45.2381	391	54.7619	67.041	46.4091	0.814954	34.2863	57.8576	88.2662	276.728
infant_ffq_f3_cooked_foods_m9	323	45.2381	391	54.7619	28.7148	21.595	0.0759853	15.5093	24.452	37.5061	212.652
infant_ffq_f4_starchy_foods_legumes_m9	323	45.2381	391	54.7619	49.4868	33.8478	0.878114	26.1326	42.8619	65.967	219.774
infant_ffq_f5_biscuits_sweet_drinks_m9	323	45.2381	391	54.7619	24.0049	31.4152	-13.8334	5.37385	13.3026	29.9939	252.69
infant_ffq_energy_kcal_recal_m9	323	45.2381	391	54.7619	400.188	195.72	1.45353	264.897	381.172	499.098	1162.17
infant_ffq_f1_starchy_foods_legumes_m12	236	33.0532	478	66.9468	79.9389	50.3011	8.91348	46.8857	68.018	102.729	343.468
infant_ffq_f2_sweet_drinks_biscuits_pudding_m12	236	33.0532	478	66.9468	97.1369	121.276	-6.12815	27.4538	50.3992	122.956	808.121
infant_ffq_f3_juice_dairy_drinks_m12	236	33.0532	478	66.9468	39.3174	43.684	-0.56705	15.8875	27.3284	45.9191	426.853
infant_ffq_f4_sweet_desserts_m12	236	33.0532	478	66.9468	49.6467	52.0194	-10.9521	16.7563	36.5112	58.6851	299.73
infant_ffq_f5_protein_fats_oils_m12	236	33.0532	478	66.9468	90.6574	55.6536	1.95246	49.0698	78.1221	118.553	303.625
infant_ffq_energy_kcal_recal_m12	236	33.0532	478	66.9468	668.463	254.004	135.196	514.972	643.666	777.721	1541.6
infant_growth_birth_weight_kg	637	89.2157	77	10.7843	3.5171	0.523283	1.59	3.23	3.51	3.87	5.24
infant_growth_birth_length_cm	548	76.7507	166	23.2493	50.2939	2.22213	40.49	49	50.455	51.885	57
infant_growth_birth_head_circumf_cm	413	57.8431	301	42.1569	34.8252	1.52104	23	34	34.94	35.67	41.5
infant_growth_standardized_weight_slope_kg	637	89.2157	77	10.7843	-0.01187	23.6968	-57.506	-13.6076	-0.272491	11.9677	125.176
infant_growth_standardized_length_slope_cm	548	76.7507	166	23.2493	1.42743	50.6339	-248.985	-31.4357	1.87651	32.0909	176.07
infant_growth_standardized_head_circumf_slope_cm	413	57.8431	301	42.1569	-0.42227	20.9953	-59.1851	-13.2747	-1.84097	11.2739	89.1506

## Sheet: Table S4.
Table S4. Summary statistics of cross-sectional, categorical metadata linked with infant gut microbiome
Phenotype	Number of Factor Levels, N	Total Sample Size, N	Percentage Total N, %	Total Missings, N	Percentage Total Missings, %	level_1_value	level_1_n	level_1_perc	level_2_value	level_2_n	level_2_perc	level_3_value	level_3_n	level_3_perc	level_4_value	level_4_n	level_4_perc	level_5_value	level_5_n	level_5_perc	level_6_value	level_6_n	level_6_perc	level_7_value	level_7_n	level_7_perc	level_8_value	level_8_n	level_8_perc	level_9_value	level_9_n	level_9_perc
infant_relations	2	714	100	0	0	singleton	690	96.6387	twins	24	3.36134	NA	NA	NA	NA	NA	NA	NA	NA	NA	NA	NA	NA	NA	NA	NA	NA	NA	NA	NA	NA	NA
sibling_number	3	714	100	0	0	no	678	94.96	sibling_1	18	2.5	sibling_2	18	2.5	NA	NA	NA	NA	NA	NA	NA	NA	NA	NA	NA	NA	NA	NA	NA	NA	NA	NA
twin_pair	3	714	100	0	0	no	690	96.6387	pair_1	12	1.68067	pair_2	12	1.68067	NA	NA	NA	NA	NA	NA	NA	NA	NA	NA	NA	NA	NA	NA	NA	NA	NA	NA
mother_education_p18	3	483	67.6471	231	32.3529	elementary_to_lower_secondary_education	9	1.86335	upper_secondary_education	111	22.9814	tertiary_education	363	75.1553	NA	NA	NA	NA	NA	NA	NA	NA	NA	NA	NA	NA	NA	NA	NA	NA	NA	NA
mother_income_net_p18	3	450	63.0252	264	36.9748	low_income	43	9.55556	middle_income	86	19.1111	high_income	321	71.3333	NA	NA	NA	NA	NA	NA	NA	NA	NA	NA	NA	NA	NA	NA	NA	NA	NA	NA
mother_health_smoked_one_whole_year_p18	2	483	67.6471	231	32.3529	no	171	35.4037	yes	312	64.5963	NA	NA	NA	NA	NA	NA	NA	NA	NA	NA	NA	NA	NA	NA	NA	NA	NA	NA	NA	NA	NA
mother_health_exposure_secondhand_smoke_while_pregnant_first_trimester_p18	2	411	57.563	303	42.437	no	319	77.6156	yes	92	22.3844	NA	NA	NA	NA	NA	NA	NA	NA	NA	NA	NA	NA	NA	NA	NA	NA	NA	NA	NA	NA	NA
mother_food_avoid_gluten_preg	2	419	58.6835	295	41.3165	no	378	90.2148	yes	41	9.7852	NA	NA	NA	NA	NA	NA	NA	NA	NA	NA	NA	NA	NA	NA	NA	NA	NA	NA	NA	NA	NA
mother_food_avoid_dairy_preg	2	421	58.9636	293	41.0364	no	363	86.2233	yes	58	13.7767	NA	NA	NA	NA	NA	NA	NA	NA	NA	NA	NA	NA	NA	NA	NA	NA	NA	NA	NA	NA	NA
mother_delivery_within_month_hosp	2	506	70.8683	208	29.1317	no	471	93.083	yes	35	6.917	NA	NA	NA	NA	NA	NA	NA	NA	NA	NA	NA	NA	NA	NA	NA	NA	NA	NA	NA	NA	NA
infant_delivery_within_month_hosp	2	486	68.0672	228	31.9328	no	480	98.7654	yes	6	1.23457	NA	NA	NA	NA	NA	NA	NA	NA	NA	NA	NA	NA	NA	NA	NA	NA	NA	NA	NA	NA	NA
mother_delivery_within_month_hosp_bloodloss	2	505	70.7283	209	29.2717	no	498	98.6139	yes	7	1.38614	NA	NA	NA	NA	NA	NA	NA	NA	NA	NA	NA	NA	NA	NA	NA	NA	NA	NA	NA	NA	NA
birth_deliverybirthcard_mode_binary	2	690	96.6387	24	3.36134	CS	105	15.2174	VG	585	84.7826	NA	NA	NA	NA	NA	NA	NA	NA	NA	NA	NA	NA	NA	NA	NA	NA	NA	NA	NA	NA	NA
birth_delivery_mode_simple	3	685	95.9384	29	4.06162	VG	585	85.4015	post_labor_CS	60	8.75912	pre_labor_CS	40	5.83942	NA	NA	NA	NA	NA	NA	NA	NA	NA	NA	NA	NA	NA	NA	NA	NA	NA	NA
birth_delivery_mode_complex	8	521	72.9692	193	27.0308	induction_emergency_CS	27	5.18234	induction_vaccum_VG	13	2.4952	induction_VG	94	18.0422	planned_CS	34	6.52591	pre_labor_emergency_CS	6	1.15163	spon_contrac_emergency_CS	32	6.14203	spon_contrac_vaccum_VG	28	5.37428	spon_contrac_VG	287	55.0864	NA	NA	NA
mother_deliverybirthcard_del_induced_balloon	2	154	21.5686	560	78.4314	no	64	41.5584	yes	90	58.4416	NA	NA	NA	NA	NA	NA	NA	NA	NA	NA	NA	NA	NA	NA	NA	NA	NA	NA	NA	NA	NA
mother_deliverybirthcard_del_induced_IV_drip	2	130	18.2073	584	81.7927	no	46	35.3846	yes	84	64.6154	NA	NA	NA	NA	NA	NA	NA	NA	NA	NA	NA	NA	NA	NA	NA	NA	NA	NA	NA	NA	NA
mother_deliverybirthcard_del_induced_breaking_membrane	2	144	20.1681	570	79.8319	no	46	31.9444	yes	98	68.0556	NA	NA	NA	NA	NA	NA	NA	NA	NA	NA	NA	NA	NA	NA	NA	NA	NA	NA	NA	NA	NA
mother_deliverybirthcard_del_induced_labour_IV_contraction_inducers	2	500	70.028	214	29.972	no	322	64.4	yes	178	35.6	NA	NA	NA	NA	NA	NA	NA	NA	NA	NA	NA	NA	NA	NA	NA	NA	NA	NA	NA	NA	NA
mother_delivery_del_pain_IV_pump_remifentanyl	2	505	70.7283	209	29.2717	no	477	94.4554	yes	28	5.54455	NA	NA	NA	NA	NA	NA	NA	NA	NA	NA	NA	NA	NA	NA	NA	NA	NA	NA	NA	NA	NA
mother_geneticsbirthcard_blood_group	4	594	83.1933	120	16.8067	A	260	43.771	AB	14	2.3569	B	55	9.25926	O	265	44.6128	NA	NA	NA	NA	NA	NA	NA	NA	NA	NA	NA	NA	NA	NA	NA
mother_genetics_blood_group_genotype	6	395	55.3221	319	44.6779	A/A	22	5.56962	A/B	11	2.78481	A/O	151	38.2278	B/B	2	0.506329	B/O	35	8.86076	O/O	174	44.0506	NA	NA	NA	NA	NA	NA	NA	NA	NA
mother_birthcard_rhesus_d_factor	2	438	61.3445	276	38.6555	negative	84	19.1781	positive	354	80.8219	NA	NA	NA	NA	NA	NA	NA	NA	NA	NA	NA	NA	NA	NA	NA	NA	NA	NA	NA	NA	NA
mother_birthcardhealth_smoking_during_pregnancy	3	561	78.5714	153	21.4286	no	535	95.3654	yes	14	2.49554	stopped	12	2.13904	NA	NA	NA	NA	NA	NA	NA	NA	NA	NA	NA	NA	NA	NA	NA	NA	NA	NA
mother_birthcard_type_twin	2	20	2.80112	694	97.1989	BCBA	14	70	MCBA	6	30	NA	NA	NA	NA	NA	NA	NA	NA	NA	NA	NA	NA	NA	NA	NA	NA	NA	NA	NA	NA	NA
mother_birthcard_infectious_disease_preg_HSV	2	326	45.6583	388	54.3417	no	318	97.546	yes	8	2.45399	NA	NA	NA	NA	NA	NA	NA	NA	NA	NA	NA	NA	NA	NA	NA	NA	NA	NA	NA	NA	NA
mother_birthcard_infectious_disease_preg_GBS	2	326	45.6583	388	54.3417	no	314	96.319	yes	12	3.68098	NA	NA	NA	NA	NA	NA	NA	NA	NA	NA	NA	NA	NA	NA	NA	NA	NA	NA	NA	NA	NA
mother_birthcardself_gestational_age_catg	4	714	100	0	0	very_preterm_=<32_wks	3	0.420168	moderate_preterm_32_<36.9wks	39	5.46218	term_36.9_41.9wks	662	92.7171	post_term_=>41.9wks	10	1.40056	NA	NA	NA	NA	NA	NA	NA	NA	NA	NA	NA	NA	NA	NA	NA
mother_birthcard_parity	6	532	74.5098	182	25.4902	0_none	239	44.9248	1_one	192	36.0902	2_two	73	13.7218	3_three	22	4.13534	4_four	5	0.93985	7_seven	1	0.18797	NA	NA	NA	NA	NA	NA	NA	NA	NA
mother_birthcardhealth_gravidity	9	609	85.2941	105	14.7059	1_one	201	33.0049	2_two	212	34.8112	3_three	107	17.5698	4_four	53	8.70279	5_five	20	3.28407	6_six	9	1.47783	7_seven	3	0.492611	8_eight	3	0.492611	9_nine	1	0.164204
mother_birthcard_water_spontaneously_broken	2	377	52.8011	337	47.1989	no	168	44.5623	yes	209	55.4377	NA	NA	NA	NA	NA	NA	NA	NA	NA	NA	NA	NA	NA	NA	NA	NA	NA	NA	NA	NA	NA
mother_deliverybirthcard_med_del_epidural	2	601	84.1737	113	15.8263	no	470	78.203	yes	131	21.797	NA	NA	NA	NA	NA	NA	NA	NA	NA	NA	NA	NA	NA	NA	NA	NA	NA	NA	NA	NA	NA
mother_birthcard_med_del_spinal	2	382	53.5014	332	46.4986	no	337	88.2199	yes	45	11.7801	NA	NA	NA	NA	NA	NA	NA	NA	NA	NA	NA	NA	NA	NA	NA	NA	NA	NA	NA	NA	NA
mother_birthcard_med_del_oxytocin_ana_H01BB	2	461	64.5658	253	35.4342	no	333	72.2343	yes	128	27.7657	NA	NA	NA	NA	NA	NA	NA	NA	NA	NA	NA	NA	NA	NA	NA	NA	NA	NA	NA	NA	NA
mother_birthcard_med_del_anaesthetic_opioid_N01AH	2	382	53.5014	332	46.4986	no	362	94.7644	yes	20	5.2356	NA	NA	NA	NA	NA	NA	NA	NA	NA	NA	NA	NA	NA	NA	NA	NA	NA	NA	NA	NA	NA
mother_birthcard_del_vacuum_pump	2	532	74.5098	182	25.4902	no	481	90.4135	yes	51	9.58647	NA	NA	NA	NA	NA	NA	NA	NA	NA	NA	NA	NA	NA	NA	NA	NA	NA	NA	NA	NA	NA
mother_birthcard_del_rupture	2	498	69.7479	216	30.2521	no	214	42.9719	yes	284	57.0281	NA	NA	NA	NA	NA	NA	NA	NA	NA	NA	NA	NA	NA	NA	NA	NA	NA	NA	NA	NA	NA
mother_birthcard_del_complications_long_labor_O63	2	426	59.6639	288	40.3361	no	395	92.723	yes	31	7.277	NA	NA	NA	NA	NA	NA	NA	NA	NA	NA	NA	NA	NA	NA	NA	NA	NA	NA	NA	NA	NA
birth_deliverybirthcard_place_delivery_simple	2	688	96.3585	26	3.64146	home	155	22.5291	hospital	533	77.4709	NA	NA	NA	NA	NA	NA	NA	NA	NA	NA	NA	NA	NA	NA	NA	NA	NA	NA	NA	NA	NA
birth_birthcard_place_delivery_complex	3	568	79.5518	146	20.4482	home	119	20.9507	hospital	388	68.3099	hospitalPK	61	10.7394	NA	NA	NA	NA	NA	NA	NA	NA	NA	NA	NA	NA	NA	NA	NA	NA	NA	NA
birth_birthcard_place_delivery_hospital	4	395	55.3221	319	44.6779	assen	61	15.443	groningen_academic	90	22.7848	groningen_peripheral	101	25.5696	other	143	36.2025	NA	NA	NA	NA	NA	NA	NA	NA	NA	NA	NA	NA	NA	NA	NA
infant_birthcard_rhesus_factor	2	38	5.32213	676	94.6779	negative	19	50	postive	19	50	NA	NA	NA	NA	NA	NA	NA	NA	NA	NA	NA	NA	NA	NA	NA	NA	NA	NA	NA	NA	NA
infant_birthcard_feeding_mode_after_birth	3	513	71.8487	201	28.1513	BF	430	83.8207	FF	51	9.94152	MF	32	6.23782	NA	NA	NA	NA	NA	NA	NA	NA	NA	NA	NA	NA	NA	NA	NA	NA	NA	NA
infant_birthcard_breech	2	489	68.4874	225	31.5126	no	463	94.683	yes	26	5.31697	NA	NA	NA	NA	NA	NA	NA	NA	NA	NA	NA	NA	NA	NA	NA	NA	NA	NA	NA	NA	NA
infant_birthcard_position_birth	2	409	57.2829	305	42.7171	occiput_anterior	388	94.8655	occiput_posterior	21	5.13447	NA	NA	NA	NA	NA	NA	NA	NA	NA	NA	NA	NA	NA	NA	NA	NA	NA	NA	NA	NA	NA
infant_birthcard_paediatrician_called	2	446	62.465	268	37.535	no	209	46.861	yes	237	53.139	NA	NA	NA	NA	NA	NA	NA	NA	NA	NA	NA	NA	NA	NA	NA	NA	NA	NA	NA	NA	NA
infant_birthcard_warmth_therapy	2	236	33.0532	478	66.9468	no	198	83.8983	yes	38	16.1017	NA	NA	NA	NA	NA	NA	NA	NA	NA	NA	NA	NA	NA	NA	NA	NA	NA	NA	NA	NA	NA
infant_birthcard_light_therapy	2	302	42.2969	412	57.7031	no	293	97.0199	yes	9	2.98013	NA	NA	NA	NA	NA	NA	NA	NA	NA	NA	NA	NA	NA	NA	NA	NA	NA	NA	NA	NA	NA
infant_birthcard_med_antibiotics_T195_J01CA_B	2	319	44.6779	395	55.3221	no	314	98.4326	yes	5	1.5674	NA	NA	NA	NA	NA	NA	NA	NA	NA	NA	NA	NA	NA	NA	NA	NA	NA	NA	NA	NA	NA
infant_birthcard_comp_large_gestational_age_P08,1	2	430	60.2241	284	39.7759	no	416	96.7442	yes	14	3.25581	NA	NA	NA	NA	NA	NA	NA	NA	NA	NA	NA	NA	NA	NA	NA	NA	NA	NA	NA	NA	NA
infant_birthcard_comp_pre_term_O60	2	430	60.2241	284	39.7759	no	419	97.4419	yes	11	2.55814	NA	NA	NA	NA	NA	NA	NA	NA	NA	NA	NA	NA	NA	NA	NA	NA	NA	NA	NA	NA	NA
mother_deliveryhealth_preg_complaint_gastroenteritis	2	608	85.1541	106	14.8459	no	457	75.1645	yes	151	24.8355	NA	NA	NA	NA	NA	NA	NA	NA	NA	NA	NA	NA	NA	NA	NA	NA	NA	NA	NA	NA	NA
mother_deliveryhealth_preg_complaint_uti	2	609	85.2941	105	14.7059	no	442	72.578	yes	167	27.422	NA	NA	NA	NA	NA	NA	NA	NA	NA	NA	NA	NA	NA	NA	NA	NA	NA	NA	NA	NA	NA
mother_deliveryhealth_preg_complaint_vaginal_fungal_inf	2	609	85.2941	105	14.7059	no	415	68.1445	yes	194	31.8555	NA	NA	NA	NA	NA	NA	NA	NA	NA	NA	NA	NA	NA	NA	NA	NA	NA	NA	NA	NA	NA
mother_deliverybirthcard_preg_comp_preeclampsia	2	673	94.2577	41	5.7423	no	657	97.6226	yes	16	2.37741	NA	NA	NA	NA	NA	NA	NA	NA	NA	NA	NA	NA	NA	NA	NA	NA	NA	NA	NA	NA	NA
mother_deliverybirthcard_preg_comp_hypertension	2	673	94.2577	41	5.7423	no	619	91.9762	yes	54	8.02377	NA	NA	NA	NA	NA	NA	NA	NA	NA	NA	NA	NA	NA	NA	NA	NA	NA	NA	NA	NA	NA
mother_deliverybirthcard_preg_comp_GDM	2	673	94.2577	41	5.7423	no	633	94.0565	yes	40	5.94354	NA	NA	NA	NA	NA	NA	NA	NA	NA	NA	NA	NA	NA	NA	NA	NA	NA	NA	NA	NA	NA
mother_deliverybirthcardhealth_preg_complaint_hyperemesis_gravidarum	2	698	97.7591	16	2.2409	no	548	78.51	yes	150	21.49	NA	NA	NA	NA	NA	NA	NA	NA	NA	NA	NA	NA	NA	NA	NA	NA	NA	NA	NA	NA	NA
mother_deliverybirthcard_preg_comp_cholestasis	2	675	94.5378	39	5.46218	no	660	97.7778	yes	15	2.22222	NA	NA	NA	NA	NA	NA	NA	NA	NA	NA	NA	NA	NA	NA	NA	NA	NA	NA	NA	NA	NA
infant_deliverybirthcard_meconium_amniotic_fluid	2	654	91.5966	60	8.40336	no	564	86.2385	yes	90	13.7615	NA	NA	NA	NA	NA	NA	NA	NA	NA	NA	NA	NA	NA	NA	NA	NA	NA	NA	NA	NA	NA
mother_deliverybirthcard_prolonged_rupture_membranes	2	674	94.3978	40	5.60224	no	653	96.8843	yes	21	3.11573	NA	NA	NA	NA	NA	NA	NA	NA	NA	NA	NA	NA	NA	NA	NA	NA	NA	NA	NA	NA	NA
infant_misc_sex	2	714	100	0	0	female	348	48.7395	male	366	51.2605	NA	NA	NA	NA	NA	NA	NA	NA	NA	NA	NA	NA	NA	NA	NA	NA	NA	NA	NA	NA	NA
family_pets_any	2	613	85.8543	101	14.1457	no	252	41.1093	yes	361	58.8907	NA	NA	NA	NA	NA	NA	NA	NA	NA	NA	NA	NA	NA	NA	NA	NA	NA	NA	NA	NA	NA
family_pets_cat	2	614	85.9944	100	14.0056	no	372	60.5863	yes	242	39.4137	NA	NA	NA	NA	NA	NA	NA	NA	NA	NA	NA	NA	NA	NA	NA	NA	NA	NA	NA	NA	NA
family_pets_dog	2	614	85.9944	100	14.0056	no	504	82.0847	yes	110	17.9153	NA	NA	NA	NA	NA	NA	NA	NA	NA	NA	NA	NA	NA	NA	NA	NA	NA	NA	NA	NA	NA
family_living_situation	4	550	77.0308	164	22.9692	other	49	8.90909	farm	23	4.18182	flat	20	3.63636	house	458	83.2727	NA	NA	NA	NA	NA	NA	NA	NA	NA	NA	NA	NA	NA	NA	NA
infant_health_food_allergy	2	537	75.2101	177	24.7899	no	486	90.5028	yes	51	9.49721	NA	NA	NA	NA	NA	NA	NA	NA	NA	NA	NA	NA	NA	NA	NA	NA	NA	NA	NA	NA	NA
infant_health_food_allergy_cowmilk	2	537	75.2101	177	24.7899	no	510	94.9721	yes	27	5.02793	NA	NA	NA	NA	NA	NA	NA	NA	NA	NA	NA	NA	NA	NA	NA	NA	NA	NA	NA	NA	NA
infant_health_food_allergy_egg	2	537	75.2101	177	24.7899	no	530	98.6965	yes	7	1.30354	NA	NA	NA	NA	NA	NA	NA	NA	NA	NA	NA	NA	NA	NA	NA	NA	NA	NA	NA	NA	NA
infant_health_eczema_diagnosis_relaxed	2	509	71.2885	205	28.7115	no	389	76.4244	yes	120	23.5756	NA	NA	NA	NA	NA	NA	NA	NA	NA	NA	NA	NA	NA	NA	NA	NA	NA	NA	NA	NA	NA
infant_health_eczema_diagnosis_strict	2	178	24.93	536	75.07	no	58	32.5843	yes	120	67.4157	NA	NA	NA	NA	NA	NA	NA	NA	NA	NA	NA	NA	NA	NA	NA	NA	NA	NA	NA	NA	NA
infant_health_impetigo	2	507	71.0084	207	28.9916	no	499	98.4221	yes	8	1.57791	NA	NA	NA	NA	NA	NA	NA	NA	NA	NA	NA	NA	NA	NA	NA	NA	NA	NA	NA	NA	NA
infant_health_itchy_skin_rash	2	473	66.2465	241	33.7535	no	419	88.5835	yes	54	11.4165	NA	NA	NA	NA	NA	NA	NA	NA	NA	NA	NA	NA	NA	NA	NA	NA	NA	NA	NA	NA	NA
infant_health_constipation	2	507	71.0084	207	28.9916	no	497	98.0276	yes	10	1.97239	NA	NA	NA	NA	NA	NA	NA	NA	NA	NA	NA	NA	NA	NA	NA	NA	NA	NA	NA	NA	NA
infant_health_abdominal_cramps	2	481	67.3669	233	32.6331	no	474	98.5447	yes	7	1.4553	NA	NA	NA	NA	NA	NA	NA	NA	NA	NA	NA	NA	NA	NA	NA	NA	NA	NA	NA	NA	NA
infant_health_reflux	2	481	67.3669	233	32.6331	no	462	96.0499	yes	19	3.9501	NA	NA	NA	NA	NA	NA	NA	NA	NA	NA	NA	NA	NA	NA	NA	NA	NA	NA	NA	NA	NA
infant_health_vomiting_m4	2	427	59.8039	287	40.1961	no	339	79.3911	yes	88	20.6089	NA	NA	NA	NA	NA	NA	NA	NA	NA	NA	NA	NA	NA	NA	NA	NA	NA	NA	NA	NA	NA
infant_health_doctor_diarrhea_m4	2	427	59.8039	287	40.1961	no	422	98.829	yes	5	1.17096	NA	NA	NA	NA	NA	NA	NA	NA	NA	NA	NA	NA	NA	NA	NA	NA	NA	NA	NA	NA	NA
infant_health_thrush_m4	2	427	59.8039	287	40.1961	no	405	94.8478	yes	22	5.15222	NA	NA	NA	NA	NA	NA	NA	NA	NA	NA	NA	NA	NA	NA	NA	NA	NA	NA	NA	NA	NA
infant_health_nose_problems_eye_irritation	2	473	66.2465	241	33.7535	no	411	86.8922	yes	62	13.1078	NA	NA	NA	NA	NA	NA	NA	NA	NA	NA	NA	NA	NA	NA	NA	NA	NA	NA	NA	NA	NA
infant_health_ear_infection	2	409	57.2829	305	42.7171	no	379	92.665	yes	30	7.33496	NA	NA	NA	NA	NA	NA	NA	NA	NA	NA	NA	NA	NA	NA	NA	NA	NA	NA	NA	NA	NA
infant_health_airway_infections	2	409	57.2829	305	42.7171	no	385	94.132	yes	24	5.86797	NA	NA	NA	NA	NA	NA	NA	NA	NA	NA	NA	NA	NA	NA	NA	NA	NA	NA	NA	NA	NA
infant_health_breathing_difficulties	2	473	66.2465	241	33.7535	no	343	72.5159	yes	130	27.4841	NA	NA	NA	NA	NA	NA	NA	NA	NA	NA	NA	NA	NA	NA	NA	NA	NA	NA	NA	NA	NA
infant_health_airway_nose_ear_throat_infection_freq	4	236	33.0532	478	66.9468	0_never	151	63.9831	1_once_twice	66	27.9661	2_three_to_five	14	5.9322	3_six_times_more	5	2.11864	NA	NA	NA	NA	NA	NA	NA	NA	NA	NA	NA	NA	NA	NA	NA
infant_health_chicken_pox	2	409	57.2829	305	42.7171	no	391	95.599	yes	18	4.40098	NA	NA	NA	NA	NA	NA	NA	NA	NA	NA	NA	NA	NA	NA	NA	NA	NA	NA	NA	NA	NA
infant_scorad_family_history_allergic_disease	2	334	46.7787	380	53.2213	no	83	24.8503	yes	251	75.1497	NA	NA	NA	NA	NA	NA	NA	NA	NA	NA	NA	NA	NA	NA	NA	NA	NA	NA	NA	NA	NA
infant_ffq_ever_never_breastfed	2	690	96.6387	24	3.36134	ever_BF	637	92.3188	never_BF	53	7.68116	NA	NA	NA	NA	NA	NA	NA	NA	NA	NA	NA	NA	NA	NA	NA	NA	NA	NA	NA	NA	NA
infant_ffq_cluster_kcal_m6	2	386	54.1	328	45.9	1_carbohydrates_fruit_vegetables_diverse	135	35	2_carbohydrates_fruit_vegetables_only	251	65	NA	NA	NA	NA	NA	NA	NA	NA	NA	NA	NA	NA	NA	NA	NA	NA	NA	NA	NA	NA	NA
infant_ffq_cluster_kcal_m9	2	423	59.2	291	40.8	1_higher_carbohydrates_sweets_fats_and_oils	254	60	2_lower_carbohydrates_sweets_fats_and_oils	169	40	NA	NA	NA	NA	NA	NA	NA	NA	NA	NA	NA	NA	NA	NA	NA	NA	NA	NA	NA	NA	NA
infant_ffq_cluster_kcal_m12	2	346	48.5	368	51.5	1_higher_carbohydrates_sweets_fats_and_oils	195	56.4	2_lower_carbohydrates_sweets_fats_and_oils	151	43.6	NA	NA	NA	NA	NA	NA	NA	NA	NA	NA	NA	NA	NA	NA	NA	NA	NA	NA	NA	NA	NA
infant_ffq_cluster_gday_m6	2	390	54.6	324	45.4	1_fruit_and_vegetables_diverse	175	44.9	2_fruit_and_vegetables_only	215	55.1	NA	NA	NA	NA	NA	NA	NA	NA	NA	NA	NA	NA	NA	NA	NA	NA	NA	NA	NA	NA	NA
infant_ffq_cluster_gday_m9	2	423	59.2	291	40.8	1_higher_dairy_sugar_and_drinks	248	58.6	2_lower_dairy_sugar_and_drinks	175	41.4	NA	NA	NA	NA	NA	NA	NA	NA	NA	NA	NA	NA	NA	NA	NA	NA	NA	NA	NA	NA	NA
infant_ffq_cluster_gday_m12	2	346	48.5	368	51.5	1_higher_dairy_and_sweetened_drinks	194	56.1	2_lower_dairy_and_sweetened_drinks	152	43.9	NA	NA	NA	NA	NA	NA	NA	NA	NA	NA	NA	NA	NA	NA	NA	NA	NA	NA	NA	NA	NA

## Sheet: Table S5.
Table S5. Summary statistics of longitudinal, numeric metadata linked with infant gut microbiome
Phenotype	Time Point	Total Sample Size, N	Percentage Total N, %	Total Missings, N	Percentage Total Missings, %	Mean	Standard Deviation	Min	Q1	Median	Q3	Max
mother_ldi_stress_past_year_preg_avg	P12	494	69.1877	220	30.8123	0.156208	0.167182	0	0	0.0833333	0.25	1.08333
mother_ldi_stress_past_year_preg_avg	P28	494	69.1877	220	30.8123	0.156208	0.167182	0	0	0.0833333	0.25	1.08333
mother_ldi_stress_past_year_preg_avg	B	494	69.1877	220	30.8123	0.156208	0.167182	0	0	0.0833333	0.25	1.08333
mother_ldi_stress_past_year_preg_avg	W2	494	69.1877	220	30.8123	0.156208	0.167182	0	0	0.0833333	0.25	1.08333
mother_ldi_stress_past_year_preg_avg	M1	494	69.1877	220	30.8123	0.156208	0.167182	0	0	0.0833333	0.25	1.08333
mother_ldi_stress_past_year_preg_avg	M2	494	69.1877	220	30.8123	0.156208	0.167182	0	0	0.0833333	0.25	1.08333
mother_ldi_stress_past_year_postpartum_avg	M3	306	42.8571	408	57.1429	0.225218	0.221866	0	0.0833333	0.166667	0.333333	1.16667
mother_ldi_stress_past_year_postpartum_avg	M6	306	42.8571	408	57.1429	0.225218	0.221866	0	0.0833333	0.166667	0.333333	1.16667
mother_ldi_stress_past_year_postpartum_avg	M9	306	42.8571	408	57.1429	0.225218	0.221866	0	0.0833333	0.166667	0.333333	1.16667
mother_ldi_stress_past_year_postpartum_avg	M12	306	42.8571	408	57.1429	0.225218	0.221866	0	0.0833333	0.166667	0.333333	1.16667
infant_scorad_measurement	M3	669	93.6975	45	6.30252	1.32377	3.93357	0	0	0	0	33.8
infant_scorad_measurement	M12	498	69.7479	216	30.2521	2.63173	5.37548	0	0	0	3.5	42.3
infant_ffq_breastfeeding_freq_weighted	M6	353	49.4398	361	50.5602	2.56232	2.35466	0	0	3	5	5
infant_ffq_breastfeeding_freq_weighted	M9	323	45.2381	391	54.7619	1.60062	2.12679	0	0	0	4	5
infant_ffq_breastfeeding_freq_weighted	M12	236	33.0532	478	66.9468	0.957627	1.68986	0	0	0	2	5
infant_ffq_formula_follow_on_freq_weighted	M6	353	49.4398	361	50.5602	0.583173	0.478231	0	0	1	1	1
infant_ffq_formula_follow_on_freq_weighted	M9	323	45.2381	391	54.7619	0.729907	0.434203	0	0.09	1	1	1
infant_ffq_formula_follow_on_freq_weighted	M12	236	33.0532	478	66.9468	0.740169	0.425019	0	0.43	1	1	1
infant_ffq_vitD_quant_amount	W2	246	34.4538	468	65.5462	6.80081	2.72197	1	4	6	10	10
infant_ffq_vitD_quant_amount	M1	507	71.0084	207	28.9916	7.05917	2.69981	1	4	6	10	10
infant_ffq_vitD_quant_amount	M2	472	66.1064	242	33.8936	6.89195	2.64113	1	4	6	10	10
infant_ffq_vitD_quant_amount	M3	448	62.7451	266	37.2549	6.81027	2.62788	1	4	6	10	10
infant_ffq_vitK_quant_amount	W2	208	29.1317	506	70.8683	4.4375	1.32459	1	3	5	5	10
infant_ffq_vitK_quant_amount	M1	398	55.7423	316	44.2577	4.4598	1.13659	1	3	5	5	10
infant_ffq_vitK_quant_amount	M2	346	48.4594	368	51.5406	4.1185	1.42863	1	3	5	5	10
infant_ffq_vitK_quant_amount	M3	169	23.6695	545	76.3305	4.12426	1.05331	2	3	5	5	8
infant_ffq_energy_kcalday_item_sum_recal	M6	341	47.7591	373	52.2409	96.2552	99.2505	0	25.4742	67.0213	133.743	576.144
infant_ffq_energy_kcalday_item_sum_recal	M9	323	45.2381	391	54.7619	400.188	195.72	1.45353	264.897	381.172	499.098	1162.17
infant_ffq_energy_kcalday_item_sum_recal	M12	236	33.0532	478	66.9468	668.463	254.004	135.196	514.972	643.666	777.721	1541.6
infant_ffq_gday_item_sum_recal	M6	341	47.7591	373	52.2409	146.816	136.146	0.111607	42.3914	104.847	210.363	881.39
infant_ffq_gday_item_sum_recal	M9	323	45.2381	391	54.7619	476.621	234.669	6.33951	304.325	434.608	612.518	1389.23
infant_ffq_gday_item_sum_recal	M12	236	33.0532	478	66.9468	840.339	371.827	179.549	589.446	782.579	1037.01	2904.88
infant_ffq_carbs_energy_perc_recal	M6	342	47.8992	372	52.1008	69.189	12.414	0	63.9488	70.5203	77.1326	86.2455
infant_ffq_carbs_energy_perc_recal	M9	323	45.2381	391	54.7619	60.2683	8.06252	37.0487	55.5713	60.3083	65.5963	86.0812
infant_ffq_carbs_energy_perc_recal	M12	236	33.0532	478	66.9468	55.5172	6.4272	40.267	50.7361	55.6526	60.0519	72.3108
infant_ffq_protein_energy_perc_recal	M6	342	47.8992	372	52.1008	12.2409	4.56167	0	9.43049	12.0933	14.485	26.9951
infant_ffq_protein_energy_perc_recal	M9	323	45.2381	391	54.7619	12.8639	1.96654	3.09057	11.7224	12.9406	14.0414	18.3801
infant_ffq_protein_energy_perc_recal	M12	236	33.0532	478	66.9468	13.4715	1.9853	9.12478	12.0222	13.3208	14.6914	21.3261
infant_ffq_fat_energy_perc_recal	M6	342	47.8992	372	52.1008	9.56725	6.76493	0	4.98027	7.29259	12.4235	45.1776
infant_ffq_fat_energy_perc_recal	M9	323	45.2381	391	54.7619	22.0733	8.11447	2.49274	16.1996	21.4157	27.5138	44.1687
infant_ffq_fat_energy_perc_recal	M12	236	33.0532	478	66.9468	27.1877	6.29481	8.66645	22.8326	27.3096	31.5321	43.1482
infant_ffq_fiber_energy_perc_recal	M6	342	47.8992	372	52.1008	6.95071	2.62059	0	5.41082	6.41911	8.08059	16.8389
infant_ffq_fiber_energy_perc_recal	M9	323	45.2381	391	54.7619	4.20824	1.02116	2.08392	3.593	4.08322	4.70433	12.9302
infant_ffq_fiber_energy_perc_recal	M12	236	33.0532	478	66.9468	3.341	0.736435	1.40533	2.84402	3.3424	3.83222	6.81852
infant_ffq_group_breads_gday	M6	341	47.7591	373	52.2409	5.70135	11.4189	0	0	0.379464	6.07143	85
infant_ffq_group_breads_gday	M9	323	45.2381	391	54.7619	42.6924	29.0206	0	21.25	42.5	49.2714	143.3
infant_ffq_group_breads_gday	M12	236	33.0532	478	66.9468	72.6365	35.4065	2.64643	43.2054	85	89.5143	201.6
infant_ffq_group_cheese_gday	M6	341	47.7591	373	52.2409	0.0469994	0.588616	0	0	0	0	10.2571
infant_ffq_group_cheese_gday	M9	323	45.2381	391	54.7619	0.797122	2.55429	0	0	0	0	25.6429
infant_ffq_group_cheese_gday	M12	236	33.0532	478	66.9468	2.16175	4.1297	0	0	0.0801339	2.56429	35.9
infant_ffq_group_dairy_gday	M9	323	45.2381	391	54.7619	30.9429	46.1434	0	0	10.729	37.5	255.989
infant_ffq_group_dairy_gday	M12	236	33.0532	478	66.9468	128.07	161.229	0	27.3314	67.2777	157.099	967.338
infant_ffq_group_egg_gday	M6	341	47.7591	373	52.2409	0.464757	1.25826	0	0	0	0	7.14286
infant_ffq_group_egg_gday	M9	323	45.2381	391	54.7619	1.89974	3.14324	0	0	0.446429	2.23214	14.2857
infant_ffq_group_egg_gday	M12	236	33.0532	478	66.9468	3.08433	4.40233	0	0.446429	1.78571	3.57143	35.7143
infant_ffq_group_fats_and_oils_gday	M6	341	47.7591	373	52.2409	0.416074	1.35521	0	0	0	0.0441964	11.558
infant_ffq_group_fats_and_oils_gday	M9	323	45.2381	391	54.7619	5.4616	5.16094	0	1.33973	4.26045	7.50112	29.7143
infant_ffq_group_fats_and_oils_gday	M12	236	33.0532	478	66.9468	11.0693	6.8943	0	6.00192	10.2032	15.3287	32.2857
infant_ffq_group_fish_gday	M6	341	47.7591	373	52.2409	0.250748	1.00971	0	0	0	0	11.9657
infant_ffq_group_fish_gday	M9	323	45.2381	391	54.7619	2.37632	4.22902	0	0	1.24643	2.49286	47.8629
infant_ffq_group_fish_gday	M12	236	33.0532	478	66.9468	3.26501	5.7093	0	0.498571	1.24643	3.98857	63.8171
infant_ffq_group_fruits_gday	M6	341	47.7591	373	52.2409	58.507	55.3231	0	15.1092	45.3276	103.989	333.241
infant_ffq_group_fruits_gday	M9	323	45.2381	391	54.7619	116.284	58.6758	2.54487	94.5954	105.764	111.08	398.052
infant_ffq_group_fruits_gday	M12	236	33.0532	478	66.9468	138.888	64.513	0	98.1514	105.764	199.026	333.241
infant_ffq_group_grain_products_and_rice_gday	M6	341	47.7591	373	52.2409	5.39504	13.9901	0	0	0.892857	7.14286	210
infant_ffq_group_grain_products_and_rice_gday	M9	323	45.2381	391	54.7619	13.5471	14.0301	0	2.1875	9.28571	20	91.4286
infant_ffq_group_grain_products_and_rice_gday	M12	236	33.0532	478	66.9468	17.6411	19.8507	0	4.28571	12.8571	24.2857	138.571
infant_ffq_group_legumes_gday	M6	341	47.7591	373	52.2409	2.24432	6.36175	0	0	0	0	40
infant_ffq_group_legumes_gday	M9	323	45.2381	391	54.7619	5.94524	10.3938	0	0	2.5	6.25	80
infant_ffq_group_legumes_gday	M12	236	33.0532	478	66.9468	7.80058	12.7334	0	0	2.5	10	90
infant_ffq_group_meat_gday	M6	341	47.7591	373	52.2409	1.47593	4.8093	0	0	0	0	43.2857
infant_ffq_group_meat_gday	M9	323	45.2381	391	54.7619	8.74165	10.5217	0	1.12723	6.67714	11.0193	86.5714
infant_ffq_group_meat_gday	M12	236	33.0532	478	66.9468	16.6974	15.8197	0	5.88563	13.3543	21.6429	101
infant_ffq_group_meat_substitute_gday	M6	341	47.7591	373	52.2409	0.00982411	0.0955933	0	0	0	0	1.41054
infant_ffq_group_meat_substitute_gday	M9	323	45.2381	391	54.7619	0.103716	0.63376	0	0	0	0	8.46321
infant_ffq_group_meat_substitute_gday	M12	236	33.0532	478	66.9468	0.376541	1.11807	0	0	0	0	5.64214
infant_ffq_group_nuts_gday	M6	341	47.7591	373	52.2409	0.265893	1.05769	0	0	0	0	8.57143
infant_ffq_group_nuts_gday	M9	323	45.2381	391	54.7619	3.35568	5.11511	0	0	1.07143	4.28571	30
infant_ffq_group_nuts_gday	M12	236	33.0532	478	66.9468	5.71268	6.09093	0	1.07143	4.28571	8.57143	42.8571
infant_ffq_group_pancake_gday	M9	323	45.2381	391	54.7619	0.773026	4.17292	0	0	0	0.3125	60
infant_ffq_group_pancake_gday	M12	236	33.0532	478	66.9468	2.32521	4.34432	0	0	0.625	2.5	35
infant_ffq_group_pasta_gday	M6	341	47.7591	373	52.2409	1.56211	7.37066	0	0	0	0	85.7143
infant_ffq_group_pasta_gday	M9	323	45.2381	391	54.7619	8.75829	10.7858	0	1.78571	5.71429	11.4286	68.5714
infant_ffq_group_pasta_gday	M12	236	33.0532	478	66.9468	13.6395	13.9687	0	5.35714	8.57143	17.1429	102.857
infant_ffq_group_pastry_gday	M9	323	45.2381	391	54.7619	2.8309	4.83523	0	0	0.632679	3.42857	27.2
infant_ffq_group_pastry_gday	M12	236	33.0532	478	66.9468	6.51832	7.31017	0	1.4258	4.12266	8.85437	48.3543
infant_ffq_group_potatoes_gday	M6	341	47.7591	373	52.2409	11.5677	22.2126	0	0	1.71429	13.7143	192
infant_ffq_group_potatoes_gday	M9	323	45.2381	391	54.7619	44.4873	46.951	0	13.7143	28.5	57.8036	308.571
infant_ffq_group_potatoes_gday	M12	236	33.0532	478	66.9468	52.8457	43.7049	0	21.0536	36	77.5714	246.857
infant_ffq_group_savoury_snacks_gday	M9	323	45.2381	391	54.7619	0.141392	1.69784	0	0	0	0	30
infant_ffq_group_savoury_snacks_gday	M12	236	33.0532	478	66.9468	0.207135	0.626263	0	0	0	0	4.28571
infant_ffq_group_sugar_sweets_gday	M6	341	47.7591	373	52.2409	0.172993	1.27894	0	0	0	0	15.05
infant_ffq_group_sugar_sweets_gday	M9	323	45.2381	391	54.7619	2.41268	4.73197	0	0	0	3.225	30.1
infant_ffq_group_sugar_sweets_gday	M12	236	33.0532	478	66.9468	5.55943	7.40238	0	0.100781	3.34089	7.59893	60.2
infant_ffq_group_sweet_drinks_gday	M6	341	47.7591	373	52.2409	0.920523	6.87461	0	0	0	0	96.79
infant_ffq_group_sweet_drinks_gday	M9	323	45.2381	391	54.7619	21.9738	59.1145	0	0	0	4.32121	580.77
infant_ffq_group_sweet_drinks_gday	M12	236	33.0532	478	66.9468	79.5648	145.137	0	0	6.91393	103.28	824.36
infant_ffq_group_tea_gday	M6	341	47.7591	373	52.2409	2.9823	15.3481	0	0	0	0	170
infant_ffq_group_tea_gday	M9	323	45.2381	391	54.7619	21.4098	45.3458	0	0	1.51786	18.2143	340
infant_ffq_group_tea_gday	M12	236	33.0532	478	66.9468	46.5069	81.5459	0	0	9.86607	51.6071	510
infant_ffq_group_vegetables_gday	M6	341	47.7591	373	52.2409	45.0039	43.3676	0	9.21493	32.1413	64.2827	192.848
infant_ffq_group_vegetables_gday	M9	323	45.2381	391	54.7619	67.4736	44.253	0	32.1413	64.2827	96.337	192.848
infant_ffq_group_vegetables_gday	M12	236	33.0532	478	66.9468	65.6899	43.1001	0	32.0833	64.0872	96.25	192.848
infant_ffq_group_water_gday	M6	341	47.7591	373	52.2409	9.82824	32.8777	0	0	0	3.79464	340
infant_ffq_group_water_gday	M9	323	45.2381	391	54.7619	74.2129	84.3661	0	18.2143	42.5	85	510
infant_ffq_group_water_gday	M12	236	33.0532	478	66.9468	160.079	141.513	0	48.5714	157.857	170	680
infant_ffq_chocolate_freq_weighted	M12	234	32.7731	480	67.2269	0.00623932	0.0211565	0	0	0	0	0.14
infant_ffq_custard_or_pudding_freq_weighted	M9	322	45.098	392	54.902	0.0530435	0.167062	0	0	0	0	1
infant_ffq_custard_or_pudding_freq_weighted	M12	235	32.9132	479	67.0868	0.139702	0.290509	0	0	0	0.115	1
infant_ffq_ice_cream_freq_weighted	M9	322	45.098	392	54.902	0.0139752	0.0598521	0	0	0	0	0.71
infant_ffq_ice_cream_freq_weighted	M12	235	32.9132	479	67.0868	0.034	0.0900532	0	0	0	0.04	0.71
infant_ffq_milk_buttermilk_freq_weighted	M12	236	33.0532	478	66.9468	0.296441	0.394072	0	0	0.09	0.605	1
infant_ffq_whipped_cream_freq_weighted	M12	235	32.9132	479	67.0868	0.0197872	0.0311111	0	0	0	0.04	0.14
infant_ffq_yoghurt_or_quark_freq_weighted	M9	322	45.098	392	54.902	0.353075	0.384952	0	0	0.14	0.71	1
infant_ffq_yoghurt_or_quark_freq_weighted	M12	235	32.9132	479	67.0868	0.544638	0.368332	0	0.14	0.57	0.86	1
infant_cry_prev_week_avg_cry_time_per_day_min	W2	243	34.0336	471	65.9664	66.358	57.5104	0	30	60	75	480
infant_cry_prev_week_avg_cry_time_per_day_min	M1	500	70.028	214	29.972	82.32	78.1039	0	30	60	120	600
infant_cry_prev_week_avg_cry_time_per_day_min	M2	465	65.1261	249	34.8739	75.0645	69.5382	0	30	60	90	600
infant_cry_prev_week_avg_cry_time_per_day_min	M3	453	63.4454	261	36.5546	58.6424	57.7134	0	30	45	60	600
infant_cry_prev_week_avg_cry_time_per_day_min	M6	346	48.4594	368	51.5406	42.3988	47.8148	0	15	30	60	480
infant_cry_prev_week_avg_cry_time_per_day_min	M9	310	43.4174	404	56.5826	35.8548	32.1756	0	15	30	45	225
infant_cry_prev_week_avg_cry_time_per_day_min	M12	234	32.7731	480	67.2269	31.6667	36.2543	0	15	15	30	330
infant_growth_weight_kg	B	637	89.2157	77	10.7843	3.5171	0.523283	1.59	3.23	3.51	3.87	5.24
infant_growth_weight_kg	W2	637	89.2157	77	10.7843	3.90397	0.516668	2.12	3.6	3.92	4.25	5.7
infant_growth_weight_kg	M1	637	89.2157	77	10.7843	4.41727	0.528455	2.6	4.1	4.42	4.76	6.18
infant_growth_weight_kg	M2	637	89.2157	77	10.7843	5.29641	0.549859	3.42	4.96	5.3	5.65	7.1
infant_growth_weight_kg	M3	637	89.2157	77	10.7843	6.03527	0.589522	4.1	5.66	6.05	6.39	7.91
infant_growth_weight_kg	M6	637	89.2157	77	10.7843	7.74017	0.708673	5.55	7.25	7.74	8.2	10.5
infant_growth_weight_kg	M9	637	89.2157	77	10.7843	8.90002	0.881504	6.2	8.32	8.9	9.42	12.8
infant_growth_weight_kg	M12	637	89.2157	77	10.7843	9.87088	1.08035	6.67	9.2	9.87	10.45	15
infant_growth_length_cm	B	548	76.7507	166	23.2493	50.2939	2.22213	40.49	49	50.455	51.885	57
infant_growth_length_cm	W2	548	76.7507	166	23.2493	52.2841	2.08835	42.56	51.1275	52.515	53.7	57.23
infant_growth_length_cm	M1	548	76.7507	166	23.2493	54.3993	2.10898	44.75	53.1175	54.605	55.81	59.24
infant_growth_length_cm	M2	548	76.7507	166	23.2493	58.0579	2.09625	48.54	56.8125	58.285	59.4	64.5
infant_growth_length_cm	M3	548	76.7507	166	23.2493	61.0609	2.09553	51.69	59.835	61.22	62.39	66.02
infant_growth_length_cm	M6	548	76.7507	166	23.2493	67.7635	2.17426	58.84	66.375	68	69.1525	73.08
infant_growth_length_cm	M9	548	76.7507	166	23.2493	72.1582	2.34104	63.68	70.64	72.245	73.7525	78.13
infant_growth_length_cm	M12	548	76.7507	166	23.2493	76.2158	2.61702	66.66	74.585	76.22	77.9075	82.84
infant_growth_head_circumf_cm	B	413	57.8431	301	42.1569	34.8252	1.52104	23	34	34.94	35.67	41.5
infant_growth_head_circumf_cm	W2	413	57.8431	301	42.1569	35.9503	1.34044	28.63	35.16	35.99	36.78	41.79
infant_growth_head_circumf_cm	M1	413	57.8431	301	42.1569	37.0868	1.34255	29.91	36.28	37.13	37.94	42.82
infant_growth_head_circumf_cm	M2	413	57.8431	301	42.1569	38.9209	1.30541	32.09	38.14	38.97	39.75	44.51
infant_growth_head_circumf_cm	M3	413	57.8431	301	42.1569	40.3516	1.28909	33.87	39.6	40.39	41.13	45.81
infant_growth_head_circumf_cm	M6	413	57.8431	301	42.1569	43.2511	1.24954	37.76	42.5	43.29	44.03	48.26
infant_growth_head_circumf_cm	M9	413	57.8431	301	42.1569	44.8177	1.25213	40.3	44.05	44.82	45.59	49.37
infant_growth_head_circumf_cm	M12	413	57.8431	301	42.1569	46.3353	1.29975	42.81	45.46	46.31	47.1	50.88
infant_growth_bmi_kg_m2	B	541	75.7703	173	24.2297	13.8838	1.47392	8.03324	13.0486	13.9125	14.8	19.5739
infant_growth_bmi_kg_m2	W2	541	75.7703	173	24.2297	14.2079	1.28825	9.60585	13.421	14.2106	15.0579	19.7443
infant_growth_bmi_kg_m2	M1	541	75.7703	173	24.2297	14.8725	1.20258	10.3706	14.1381	14.855	15.6232	19.8197
infant_growth_bmi_kg_m2	M2	541	75.7703	173	24.2297	15.6749	1.09214	11.493	14.9686	15.6473	16.3545	20.4658
infant_growth_bmi_kg_m2	M3	541	75.7703	173	24.2297	16.1568	1.0958	12.3024	15.4708	16.0992	16.8175	19.8461
infant_growth_bmi_kg_m2	M6	541	75.7703	173	24.2297	16.8292	1.1369	13.3737	16.1423	16.8332	17.4821	21.1942
infant_growth_bmi_kg_m2	M9	541	75.7703	173	24.2297	17.0649	1.31334	12.8063	16.274	17.0233	17.8208	22.2954
infant_growth_bmi_kg_m2	M12	541	75.7703	173	24.2297	16.962	1.48013	12.0498	16.0373	16.8782	17.8104	22.7779
infant_growth_WFL_SDS	B	338	47.3389	376	52.6611	0.275827	1.21681	-7.22778	-0.367237	0.428544	1.10881	3.46494
infant_growth_WFL_SDS	W2	468	65.5462	246	34.4538	0.307326	1.02257	-5.06303	-0.225205	0.430949	0.969554	3.36894
infant_growth_WFL_SDS	M1	526	73.6695	188	26.3305	0.485857	0.920759	-4.30408	-0.0513345	0.549271	1.07993	3.20456
infant_growth_WFL_SDS	M2	540	75.6303	174	24.3697	0.514411	0.824378	-3.50256	0.00777615	0.556338	1.02484	3.22805
infant_growth_WFL_SDS	M3	541	75.7703	173	24.2297	0.445891	0.822043	-3.02689	-0.0753223	0.477496	0.979007	2.69435
infant_growth_WFL_SDS	M6	541	75.7703	173	24.2297	0.244564	0.833431	-2.68485	-0.266376	0.246771	0.773814	2.86828
infant_growth_WFL_SDS	M9	541	75.7703	173	24.2297	0.151119	0.943296	-3.17942	-0.424456	0.160608	0.761026	3.28386
infant_growth_WFL_SDS	M12	541	75.7703	173	24.2297	-0.0214084	1.07851	-4.24568	-0.667393	-0.00613783	0.695016	3.59852
infant_growth_WFA_SDS	W2	637	89.2157	77	10.7843	0.57259	1.26127	-4.40116	-0.0814831	0.620684	1.39288	4.14043
infant_growth_WFA_SDS	M1	637	89.2157	77	10.7843	0.706571	1.13549	-3.69076	0.0932642	0.738615	1.43717	3.82731
infant_growth_WFA_SDS	M2	637	89.2157	77	10.7843	0.718244	0.966405	-2.96194	0.158151	0.729451	1.33931	3.44727
infant_growth_WFA_SDS	M3	637	89.2157	77	10.7843	0.63208	0.894558	-2.62433	0.0795758	0.644267	1.21557	3.57125
infant_growth_WFA_SDS	M6	637	89.2157	77	10.7843	0.365005	0.82531	-2.43317	-0.18272	0.371784	0.868849	3.14992
infant_growth_WFA_SDS	M9	637	89.2157	77	10.7843	0.154161	0.890671	-2.91114	-0.401916	0.200209	0.664215	3.55221
infant_growth_WFA_SDS	M12	637	89.2157	77	10.7843	0.0487173	0.984576	-3.29005	-0.524156	0.0934041	0.584219	4.01414
infant_growth_LFA_SDS	W2	548	76.7507	166	23.2493	-0.148602	0.864868	-4.17847	-0.642335	-0.099344	0.404825	2.1143
infant_growth_LFA_SDS	M1	548	76.7507	166	23.2493	0.0476759	0.865884	-3.89804	-0.455255	0.111975	0.623822	2.26872
infant_growth_LFA_SDS	M2	548	76.7507	166	23.2493	0.270946	0.836166	-3.50951	-0.208513	0.339543	0.836644	2.79142
infant_growth_LFA_SDS	M3	548	76.7507	166	23.2493	0.333205	0.816813	-3.27571	-0.138617	0.398845	0.889228	2.44644
infant_growth_LFA_SDS	M6	548	76.7507	166	23.2493	0.203685	0.797598	-2.96629	-0.233435	0.250439	0.747243	2.19544
infant_growth_LFA_SDS	M9	548	76.7507	166	23.2493	0.0358729	0.819458	-2.82079	-0.490658	0.0575703	0.584547	2.00956
infant_growth_LFA_SDS	M12	548	76.7507	166	23.2493	0.133131	0.881776	-2.98763	-0.412812	0.171481	0.690781	2.27851
infant_growth_HcFA_SDS	B	413	57.8431	301	42.1569	-0.427146	1.12592	-9.57123	-0.906246	-0.485936	0.164471	5.1354
infant_growth_HcFA_SDS	W2	413	57.8431	301	42.1569	-0.177147	0.956572	-5.6167	-0.653999	-0.164681	0.328024	4.67721
infant_growth_HcFA_SDS	M1	413	57.8431	301	42.1569	-0.048477	0.948439	-5.24605	-0.564075	-0.0667954	0.459736	4.78159
infant_growth_HcFA_SDS	M2	413	57.8431	301	42.1569	-0.0186156	0.902055	-4.84136	-0.478452	-0.0476904	0.507312	4.73076
infant_growth_HcFA_SDS	M3	413	57.8431	301	42.1569	-0.034712	0.880683	-4.52044	-0.487205	-0.074388	0.473167	4.56854
infant_growth_HcFA_SDS	M6	413	57.8431	301	42.1569	-0.227403	0.849001	-3.86565	-0.695944	-0.229146	0.305413	4.0398
infant_growth_HcFA_SDS	M9	413	57.8431	301	42.1569	-0.386602	0.817413	-3.18389	-0.883918	-0.393159	0.178007	3.45966
infant_growth_HcFA_SDS	M12	413	57.8431	301	42.1569	-0.153257	0.813393	-2.89007	-0.670403	-0.187574	0.375725	3.23985
infant_growth_BMI_SDS	W2	541	75.7703	173	24.2297	0.99776	1.17722	-3.96281	0.321276	1.06008	1.74858	4.72392
infant_growth_BMI_SDS	M1	541	75.7703	173	24.2297	0.858687	1.05642	-3.50875	0.249865	0.871044	1.48946	4.1673
infant_growth_BMI_SDS	M2	541	75.7703	173	24.2297	0.604192	0.872075	-2.98627	0.117635	0.607105	1.15405	3.65959
infant_growth_BMI_SDS	M3	541	75.7703	173	24.2297	0.473994	0.823641	-2.65332	-0.0162897	0.466596	0.951795	2.98636
infant_growth_BMI_SDS	M6	541	75.7703	173	24.2297	0.297413	0.840048	-2.48016	-0.19162	0.294115	0.787357	3.1082
infant_growth_BMI_SDS	M9	541	75.7703	173	24.2297	0.108483	0.968281	-3.46853	-0.441238	0.0860668	0.743103	3.4118
infant_growth_BMI_SDS	M12	541	75.7703	173	24.2297	-0.119193	1.11734	-4.55652	-0.809573	-0.0943096	0.620891	3.57846
infant_asq_com_score	M6	362	50.7003	352	49.2997	45.9945	9.3204	15	40	45	55	60
infant_asq_com_score	M12	337	47.1989	377	52.8011	35.6973	15.2566	0	25	40	50	60
infant_asq_gm_score	M6	362	50.7003	352	49.2997	34.6091	13.3534	0	25	35	45	60
infant_asq_gm_score	M12	336	47.0588	378	52.9412	36.0625	19.0537	0	20	40	50	60
infant_asq_fm_score	M6	360	50.4202	354	49.5798	44.1	11.8105	10	35	45	55	60
infant_asq_fm_score	M12	337	47.1989	377	52.8011	49.9852	9.58187	0	45	50	60	60
infant_asq_ps_score	M6	361	50.5602	353	49.4398	49.241	10.4001	10	45	50	60	60
infant_asq_ps_score	M12	331	46.3585	383	53.6415	43.4668	12.8629	0	35	45	55	60
infant_asq_psoc_score	M6	361	50.5602	353	49.4398	39.6427	13.2894	0	30	40	50	60
infant_asq_psoc_score	M12	336	47.0588	378	52.9412	42.3616	12.1695	0	35	45	50	60
infant_asq_total_score	M6	359	50.2801	355	49.7199	213.897	41.6485	70	190	220	245	295
infant_asq_total_score	M12	330	46.2185	384	53.7815	207.858	48.5584	55	180	212.5	245	300
infant_IGSQ_score	M3	210	29.4118	504	70.5882	22.7429	6.10205	13	18	22	26	43
infant_IGSQ_score	M12	134	18.7675	580	81.2325	16.0299	2.72262	11	14	15	17	25
infant_sleep_day_hours	M3	252	35.2941	462	64.7059	4.30589	1.66502	0	3	4	5	10
infant_sleep_day_hours	M6	205	28.7115	509	71.2885	3.58943	1.33649	0	3	3.5	4	9
infant_sleep_day_hours	M12	135	18.9076	579	81.0924	2.80494	1.00239	0	2	3	3	10
infant_sleep_night_hours	M3	252	35.2941	462	64.7059	10.2804	1.17124	5	10	10.5	11	12
infant_sleep_night_hours	M6	205	28.7115	509	71.2885	10.563	1.25304	2.5	10	11	11	12.5
infant_sleep_night_hours	M12	135	18.9076	579	81.0924	10.9698	1.33716	0	11	11	12	12.5
infant_sleep_times_awake_night	M3	251	35.1541	463	64.8459	1.38645	1.30463	0	0	1	2	10
infant_sleep_times_awake_night	M6	205	28.7115	509	71.2885	1.59024	1.30155	0	1	1	2	6
infant_sleep_times_awake_night	M12	133	18.6275	581	81.3725	1.06767	1.08149	0	0	1	2	5

## Sheet: Table S6
Table S6. Summary statistics of longitudinal, categorical metadata linked with infant gut microbiome
Phenotype	Time point	Number of Factor Levels, N	Total Sample Size, N	Percentage Total N, %	Total Missings, N	Percentage Total Missings, %	level_1_value	level_1_n	level_1_perc	level_2_value	level_2_n	level_2_perc	level_3_value	level_3_n	level_3_perc	level_4_value	level_4_n	level_4_perc	level_5_value	level_5_n	level_5_perc	level_6_value	level_6_n	level_6_perc
infant_health_AFR_diarrhea_vomit	M3	2	427	59.8039	287	40.1961	no	418	97.8923	yes	9	2.10773	NA	NA	NA	NA	NA	NA	NA	NA	NA	NA	NA	NA
infant_health_AFR_diarrhea_vomit	M12	2	236	33.0532	478	66.9468	no	227	96.1864	yes	9	3.81356	NA	NA	NA	NA	NA	NA	NA	NA	NA	NA	NA	NA
infant_health_airway_infections	M6	2	352	49.2997	362	50.7003	no	346	98.2955	yes	6	1.70455	NA	NA	NA	NA	NA	NA	NA	NA	NA	NA	NA	NA
infant_health_airway_infections	M12	2	236	33.0532	478	66.9468	no	216	91.5254	yes	20	8.47458	NA	NA	NA	NA	NA	NA	NA	NA	NA	NA	NA	NA
infant_health_eczema_questionnaire	M3	2	427	59.8039	287	40.1961	no	373	87.3536	yes	54	12.6464	NA	NA	NA	NA	NA	NA	NA	NA	NA	NA	NA	NA
infant_health_eczema_questionnaire	M6	2	352	49.2997	362	50.7003	no	343	97.4432	yes	9	2.55682	NA	NA	NA	NA	NA	NA	NA	NA	NA	NA	NA	NA
infant_health_eczema_questionnaire	M12	2	236	33.0532	478	66.9468	no	177	75	yes	59	25	NA	NA	NA	NA	NA	NA	NA	NA	NA	NA	NA	NA
infant_health_food_allergy	M3	2	427	59.8039	287	40.1961	no	405	94.8478	yes	22	5.15222	NA	NA	NA	NA	NA	NA	NA	NA	NA	NA	NA	NA
infant_health_food_allergy	M6	2	352	49.2997	362	50.7003	no	328	93.1818	yes	24	6.81818	NA	NA	NA	NA	NA	NA	NA	NA	NA	NA	NA	NA
infant_health_food_allergy	M9	2	323	45.2381	391	54.7619	no	306	94.7368	yes	17	5.26316	NA	NA	NA	NA	NA	NA	NA	NA	NA	NA	NA	NA
infant_health_food_allergy	M12	2	236	33.0532	478	66.9468	no	217	91.9492	yes	19	8.05085	NA	NA	NA	NA	NA	NA	NA	NA	NA	NA	NA	NA
infant_health_food_allergy_cowmilk	M3	2	427	59.8039	287	40.1961	no	412	96.4871	yes	15	3.51288	NA	NA	NA	NA	NA	NA	NA	NA	NA	NA	NA	NA
infant_health_food_allergy_cowmilk	M6	2	352	49.2997	362	50.7003	no	338	96.0227	yes	14	3.97727	NA	NA	NA	NA	NA	NA	NA	NA	NA	NA	NA	NA
infant_health_food_allergy_cowmilk	M9	2	323	45.2381	391	54.7619	no	311	96.2848	yes	12	3.71517	NA	NA	NA	NA	NA	NA	NA	NA	NA	NA	NA	NA
infant_health_food_allergy_cowmilk	M12	2	236	33.0532	478	66.9468	no	224	94.9153	yes	12	5.08475	NA	NA	NA	NA	NA	NA	NA	NA	NA	NA	NA	NA
infant_health_food_allergy_egg	M9	2	323	45.2381	391	54.7619	no	318	98.452	yes	5	1.54799	NA	NA	NA	NA	NA	NA	NA	NA	NA	NA	NA	NA
infant_health_food_allergy_egg	M12	2	236	33.0532	478	66.9468	no	230	97.4576	yes	6	2.54237	NA	NA	NA	NA	NA	NA	NA	NA	NA	NA	NA	NA
infant_health_itchy_skin_rash	M3	2	427	59.8039	287	40.1961	no	397	92.9742	yes	30	7.02576	NA	NA	NA	NA	NA	NA	NA	NA	NA	NA	NA	NA
infant_health_itchy_skin_rash	M12	2	236	33.0532	478	66.9468	no	204	86.4407	yes	32	13.5593	NA	NA	NA	NA	NA	NA	NA	NA	NA	NA	NA	NA
infant_health_known_health_problem	M3	2	513	71.8487	201	28.1513	no	58	11.306	yes	455	88.694	NA	NA	NA	NA	NA	NA	NA	NA	NA	NA	NA	NA
infant_health_known_health_problem	M6	2	353	49.4398	361	50.5602	no	270	76.4873	yes	83	23.5127	NA	NA	NA	NA	NA	NA	NA	NA	NA	NA	NA	NA
infant_health_known_health_problem	M9	2	323	45.2381	391	54.7619	no	286	88.5449	yes	37	11.4551	NA	NA	NA	NA	NA	NA	NA	NA	NA	NA	NA	NA
infant_health_known_health_problem	M12	2	236	33.0532	478	66.9468	no	10	4.23729	yes	226	95.7627	NA	NA	NA	NA	NA	NA	NA	NA	NA	NA	NA	NA
infant_health_wheeze	M3	2	427	59.8039	287	40.1961	no	382	89.4614	yes	45	10.5386	NA	NA	NA	NA	NA	NA	NA	NA	NA	NA	NA	NA
infant_health_wheeze	M12	2	236	33.0532	478	66.9468	no	217	91.9492	yes	19	8.05085	NA	NA	NA	NA	NA	NA	NA	NA	NA	NA	NA	NA
infant_ffq_feeding_mode_simple	W2	2	453	63.4454	261	36.5546	excl_BF	380	83.8852	excl_FF	73	16.1148	NA	NA	NA	NA	NA	NA	NA	NA	NA	NA	NA	NA
infant_ffq_feeding_mode_simple	M1	2	433	60.6443	281	39.3557	excl_BF	326	75.2887	excl_FF	107	24.7113	NA	NA	NA	NA	NA	NA	NA	NA	NA	NA	NA	NA
infant_ffq_feeding_mode_simple	M2	2	458	64.1457	256	35.8543	excl_BF	316	68.9956	excl_FF	142	31.0044	NA	NA	NA	NA	NA	NA	NA	NA	NA	NA	NA	NA
infant_ffq_feeding_mode_simple	M3	2	431	60.3641	283	39.6359	excl_BF	259	60.0928	excl_FF	172	39.9072	NA	NA	NA	NA	NA	NA	NA	NA	NA	NA	NA	NA
infant_ffq_feeding_mode_simple	M6	2	270	37.8151	444	62.1849	excl_BF	123	45.5556	excl_FF	147	54.4444	NA	NA	NA	NA	NA	NA	NA	NA	NA	NA	NA	NA
infant_ffq_feeding_mode_simple	M9	2	263	36.8347	451	63.1653	excl_BF	72	27.3764	excl_FF	191	72.6236	NA	NA	NA	NA	NA	NA	NA	NA	NA	NA	NA	NA
infant_ffq_feeding_mode_simple	M12	2	201	28.1513	513	71.8487	excl_BF	42	20.8955	excl_FF	159	79.1045	NA	NA	NA	NA	NA	NA	NA	NA	NA	NA	NA	NA
infant_ffq_feeding_mode_complex	W2	3	528	73.9496	186	26.0504	BF	380	71.9697	FF	74	14.0152	MF	74	14.0152	NA	NA	NA	NA	NA	NA	NA	NA	NA
infant_ffq_feeding_mode_complex	M1	3	550	77.0308	164	22.9692	BF	327	59.4545	FF	109	19.8182	MF	114	20.7273	NA	NA	NA	NA	NA	NA	NA	NA	NA
infant_ffq_feeding_mode_complex	M2	3	552	77.3109	162	22.6891	BF	318	57.6087	FF	145	26.2681	MF	89	16.1232	NA	NA	NA	NA	NA	NA	NA	NA	NA
infant_ffq_feeding_mode_complex	M3	3	521	72.9692	193	27.0308	BF	259	49.7121	FF	172	33.0134	MF	90	17.2745	NA	NA	NA	NA	NA	NA	NA	NA	NA
infant_ffq_feeding_mode_complex	M6	3	353	49.4398	361	50.5602	BF	123	34.8442	FF	147	41.6431	MF	83	23.5127	NA	NA	NA	NA	NA	NA	NA	NA	NA
infant_ffq_feeding_mode_complex	M9	3	323	45.2381	391	54.7619	BF	72	22.291	FF	191	59.1331	MF	60	18.5759	NA	NA	NA	NA	NA	NA	NA	NA	NA
infant_ffq_feeding_mode_complex	M12	3	228	31.9328	486	68.0672	BF	42	18.4211	FF	159	69.7368	MF	27	11.8421	NA	NA	NA	NA	NA	NA	NA	NA	NA
infant_ffq_stopped_breastfeeding	W2	3	488	68.3473	226	31.6527	never_BF	57	11.6803	no	413	84.6311	yes	18	3.68852	NA	NA	NA	NA	NA	NA	NA	NA	NA
infant_ffq_stopped_breastfeeding	M1	3	470	65.8263	244	34.1737	never_BF	52	11.0638	no	371	78.9362	yes	47	10	NA	NA	NA	NA	NA	NA	NA	NA	NA
infant_ffq_stopped_breastfeeding	M2	3	488	68.3473	226	31.6527	never_BF	57	11.6803	no	358	73.3607	yes	73	14.959	NA	NA	NA	NA	NA	NA	NA	NA	NA
infant_ffq_stopped_breastfeeding	M3	3	488	68.3473	226	31.6527	never_BF	57	11.6803	no	323	66.1885	yes	108	22.1311	NA	NA	NA	NA	NA	NA	NA	NA	NA
infant_ffq_stopped_breastfeeding	M6	3	488	68.3473	226	31.6527	never_BF	57	11.6803	no	210	43.0328	yes	221	45.2869	NA	NA	NA	NA	NA	NA	NA	NA	NA
infant_ffq_stopped_breastfeeding	M9	3	488	68.3473	226	31.6527	never_BF	57	11.6803	no	102	20.9016	yes	329	67.418	NA	NA	NA	NA	NA	NA	NA	NA	NA
infant_ffq_cmpltry_food_cdc	M3	2	536	75.07	178	24.93	no	458	85.4478	yes	78	14.5522	NA	NA	NA	NA	NA	NA	NA	NA	NA	NA	NA	NA
infant_ffq_cmpltry_food_cdc	M6	2	517	72.409	197	27.591	no	6	1.16054	yes	511	98.8395	NA	NA	NA	NA	NA	NA	NA	NA	NA	NA	NA	NA
infant_pureed_fruit_veg_intro	M6	2	449	62.8852	265	37.1148	no	14	3.11804	yes	435	96.882	NA	NA	NA	NA	NA	NA	NA	NA	NA	NA	NA	NA
infant_food_solid_intro	M6	2	463	64.8459	251	35.1541	no	165	35.6371	yes	298	64.3629	NA	NA	NA	NA	NA	NA	NA	NA	NA	NA	NA	NA
infant_ffq_chocolate	M12	2	234	32.7731	480	67.2269	no	210	89.7436	yes	24	10.2564	NA	NA	NA	NA	NA	NA	NA	NA	NA	NA	NA	NA
infant_ffq_custard_or_pudding	M9	2	322	45.098	392	54.902	no	259	80.4348	yes	63	19.5652	NA	NA	NA	NA	NA	NA	NA	NA	NA	NA	NA	NA
infant_ffq_custard_or_pudding	M12	2	235	32.9132	479	67.0868	no	156	66.383	yes	79	33.617	NA	NA	NA	NA	NA	NA	NA	NA	NA	NA	NA	NA
infant_ffq_fresh_fruits	M6	2	352	49.2997	362	50.7003	no	28	7.95455	yes	324	92.0455	NA	NA	NA	NA	NA	NA	NA	NA	NA	NA	NA	NA
infant_ffq_ice_cream	M9	2	322	45.098	392	54.902	no	277	86.0248	yes	45	13.9752	NA	NA	NA	NA	NA	NA	NA	NA	NA	NA	NA	NA
infant_ffq_ice_cream	M12	2	235	32.9132	479	67.0868	no	158	67.234	yes	77	32.766	NA	NA	NA	NA	NA	NA	NA	NA	NA	NA	NA	NA
infant_ffq_milk_buttermilk	M9	2	322	45.098	392	54.902	no	305	94.7205	yes	17	5.2795	NA	NA	NA	NA	NA	NA	NA	NA	NA	NA	NA	NA
infant_ffq_milk_buttermilk	M12	2	236	33.0532	478	66.9468	no	103	43.6441	yes	133	56.3559	NA	NA	NA	NA	NA	NA	NA	NA	NA	NA	NA	NA
infant_ffq_whipped_cream	M9	2	322	45.098	392	54.902	no	287	89.1304	yes	35	10.8696	NA	NA	NA	NA	NA	NA	NA	NA	NA	NA	NA	NA
infant_ffq_whipped_cream	M12	2	235	32.9132	479	67.0868	no	150	63.8298	yes	85	36.1702	NA	NA	NA	NA	NA	NA	NA	NA	NA	NA	NA	NA
infant_ffq_yoghurt_or_quark	M9	2	322	45.098	392	54.902	no	105	32.6087	yes	217	67.3913	NA	NA	NA	NA	NA	NA	NA	NA	NA	NA	NA	NA
infant_ffq_yoghurt_or_quark	M12	2	235	32.9132	479	67.0868	no	31	13.1915	yes	204	86.8085	NA	NA	NA	NA	NA	NA	NA	NA	NA	NA	NA	NA
infant_cry_prev_week_cry_more_3h_per_day	W2	2	247	34.5938	467	65.4062	no	217	87.8543	yes	30	12.1457	NA	NA	NA	NA	NA	NA	NA	NA	NA	NA	NA	NA
infant_cry_prev_week_cry_more_3h_per_day	M1	2	508	71.1485	206	28.8515	no	439	86.4173	yes	69	13.5827	NA	NA	NA	NA	NA	NA	NA	NA	NA	NA	NA	NA
infant_cry_prev_week_cry_more_3h_per_day	M2	2	474	66.3866	240	33.6134	no	415	87.5527	yes	59	12.4473	NA	NA	NA	NA	NA	NA	NA	NA	NA	NA	NA	NA
infant_cry_prev_week_cry_more_3h_per_day	M3	2	457	64.0056	257	35.9944	no	426	93.2166	yes	31	6.78337	NA	NA	NA	NA	NA	NA	NA	NA	NA	NA	NA	NA
infant_cry_prev_week_cry_more_3h_per_day	M6	2	347	48.5994	367	51.4006	no	337	97.1182	yes	10	2.88184	NA	NA	NA	NA	NA	NA	NA	NA	NA	NA	NA	NA
infant_cry_prev_week_cry_more_3h_per_day	M9	2	313	43.8375	401	56.1625	no	305	97.4441	yes	8	2.55591	NA	NA	NA	NA	NA	NA	NA	NA	NA	NA	NA	NA
infant_cry_prev_week_cry_more_3h_per_day	M12	2	234	32.7731	480	67.2269	no	230	98.2906	yes	4	1.7094	NA	NA	NA	NA	NA	NA	NA	NA	NA	NA	NA	NA
infant_growth_overweight	W2	2	541	75.7703	173	24.2297	no	446	82.4399	yes	95	17.5601	NA	NA	NA	NA	NA	NA	NA	NA	NA	NA	NA	NA
infant_growth_overweight	M1	2	541	75.7703	173	24.2297	no	474	87.6155	yes	67	12.3845	NA	NA	NA	NA	NA	NA	NA	NA	NA	NA	NA	NA
infant_growth_overweight	M2	2	541	75.7703	173	24.2297	no	515	95.1941	yes	26	4.80591	NA	NA	NA	NA	NA	NA	NA	NA	NA	NA	NA	NA
infant_growth_overweight	M3	2	541	75.7703	173	24.2297	no	520	96.1183	yes	21	3.8817	NA	NA	NA	NA	NA	NA	NA	NA	NA	NA	NA	NA
infant_growth_overweight	M6	2	541	75.7703	173	24.2297	no	528	97.597	yes	13	2.40296	NA	NA	NA	NA	NA	NA	NA	NA	NA	NA	NA	NA
infant_growth_overweight	M9	2	541	75.7703	173	24.2297	no	525	97.0425	yes	16	2.95749	NA	NA	NA	NA	NA	NA	NA	NA	NA	NA	NA	NA
infant_growth_overweight	M12	2	541	75.7703	173	24.2297	no	524	96.8577	yes	17	3.14233	NA	NA	NA	NA	NA	NA	NA	NA	NA	NA	NA	NA
infant_asq_com_cutoff_relaxed	M6	2	362	50.7003	352	49.2997	development_delay	12	3.31492	development_typical	350	96.6851	NA	NA	NA	NA	NA	NA	NA	NA	NA	NA	NA	NA
infant_asq_com_cutoff_relaxed	M12	2	337	47.1989	377	52.8011	development_delay	46	13.6499	development_typical	291	86.3501	NA	NA	NA	NA	NA	NA	NA	NA	NA	NA	NA	NA
infant_asq_com_cutoff_strict	M6	2	362	50.7003	352	49.2997	development_delay	190	52.4862	development_typical	172	47.5138	NA	NA	NA	NA	NA	NA	NA	NA	NA	NA	NA	NA
infant_asq_com_cutoff_strict	M12	2	337	47.1989	377	52.8011	development_delay	212	62.908	development_typical	125	37.092	NA	NA	NA	NA	NA	NA	NA	NA	NA	NA	NA	NA
infant_asq_gm_cutoff_relaxed	M6	2	362	50.7003	352	49.2997	development_delay	74	20.442	development_typical	288	79.558	NA	NA	NA	NA	NA	NA	NA	NA	NA	NA	NA	NA
infant_asq_gm_cutoff_relaxed	M12	2	336	47.0588	378	52.9412	development_delay	86	25.5952	development_typical	250	74.4048	NA	NA	NA	NA	NA	NA	NA	NA	NA	NA	NA	NA
infant_asq_gm_cutoff_strict	M6	2	362	50.7003	352	49.2997	development_delay	286	79.0055	development_typical	76	20.9945	NA	NA	NA	NA	NA	NA	NA	NA	NA	NA	NA	NA
infant_asq_gm_cutoff_strict	M12	2	336	47.0588	378	52.9412	development_delay	214	63.6905	development_typical	122	36.3095	NA	NA	NA	NA	NA	NA	NA	NA	NA	NA	NA	NA
infant_asq_fm_cutoff_relaxed	M6	2	360	50.4202	354	49.5798	development_delay	32	8.88889	development_typical	328	91.1111	NA	NA	NA	NA	NA	NA	NA	NA	NA	NA	NA	NA
infant_asq_fm_cutoff_relaxed	M12	2	337	47.1989	377	52.8011	development_delay	18	5.34125	development_typical	319	94.6588	NA	NA	NA	NA	NA	NA	NA	NA	NA	NA	NA	NA
infant_asq_fm_cutoff_strict	M6	2	360	50.4202	354	49.5798	development_delay	208	57.7778	development_typical	152	42.2222	NA	NA	NA	NA	NA	NA	NA	NA	NA	NA	NA	NA
infant_asq_fm_cutoff_strict	M12	2	337	47.1989	377	52.8011	development_delay	196	58.1602	development_typical	141	41.8398	NA	NA	NA	NA	NA	NA	NA	NA	NA	NA	NA	NA
infant_asq_ps_cutoff_relaxed	M6	2	361	50.5602	353	49.4398	development_delay	14	3.87812	development_typical	347	96.1219	NA	NA	NA	NA	NA	NA	NA	NA	NA	NA	NA	NA
infant_asq_ps_cutoff_relaxed	M12	2	331	46.3585	383	53.6415	development_delay	43	12.9909	development_typical	288	87.0091	NA	NA	NA	NA	NA	NA	NA	NA	NA	NA	NA	NA
infant_asq_ps_cutoff_strict	M6	2	361	50.5602	353	49.4398	development_delay	198	54.8476	development_typical	163	45.1524	NA	NA	NA	NA	NA	NA	NA	NA	NA	NA	NA	NA
infant_asq_ps_cutoff_strict	M12	2	331	46.3585	383	53.6415	development_delay	179	54.0785	development_typical	152	45.9215	NA	NA	NA	NA	NA	NA	NA	NA	NA	NA	NA	NA
infant_asq_psoc_cutoff_relaxed	M6	2	361	50.5602	353	49.4398	development_delay	65	18.0055	development_typical	296	81.9945	NA	NA	NA	NA	NA	NA	NA	NA	NA	NA	NA	NA
infant_asq_psoc_cutoff_relaxed	M12	2	336	47.0588	378	52.9412	development_delay	26	7.7381	development_typical	310	92.2619	NA	NA	NA	NA	NA	NA	NA	NA	NA	NA	NA	NA
infant_asq_psoc_cutoff_strict	M6	2	361	50.5602	353	49.4398	development_delay	250	69.2521	development_typical	111	30.7479	NA	NA	NA	NA	NA	NA	NA	NA	NA	NA	NA	NA
infant_asq_psoc_cutoff_strict	M12	2	336	47.0588	378	52.9412	development_delay	212	63.0952	development_typical	124	36.9048	NA	NA	NA	NA	NA	NA	NA	NA	NA	NA	NA	NA
infant_rome_colic	M1	2	505	70.7283	209	29.2717	no	492	97.4257	yes	13	2.57426	NA	NA	NA	NA	NA	NA	NA	NA	NA	NA	NA	NA
infant_rome_colic	M2	2	474	66.3866	240	33.6134	no	458	96.6245	yes	16	3.37553	NA	NA	NA	NA	NA	NA	NA	NA	NA	NA	NA	NA
infant_rome_colic	M3	2	458	64.1457	256	35.8543	no	445	97.1616	yes	13	2.83843	NA	NA	NA	NA	NA	NA	NA	NA	NA	NA	NA	NA
infant_rome_regurgitation	M1	2	506	70.8683	208	29.1317	no	155	30.6324	yes	351	69.3676	NA	NA	NA	NA	NA	NA	NA	NA	NA	NA	NA	NA
infant_rome_regurgitation	M2	2	476	66.6667	238	33.3333	no	165	34.6639	yes	311	65.3361	NA	NA	NA	NA	NA	NA	NA	NA	NA	NA	NA	NA
infant_rome_regurgitation	M3	2	459	64.2857	255	35.7143	no	196	42.7015	yes	263	57.2985	NA	NA	NA	NA	NA	NA	NA	NA	NA	NA	NA	NA
infant_rome_regurgitation	M6	2	349	48.8796	365	51.1204	no	172	49.2837	yes	177	50.7163	NA	NA	NA	NA	NA	NA	NA	NA	NA	NA	NA	NA
infant_rome_regurgitation	M9	2	313	43.8375	401	56.1625	no	229	73.1629	yes	84	26.8371	NA	NA	NA	NA	NA	NA	NA	NA	NA	NA	NA	NA
infant_rome_regurgitation	M12	2	234	32.7731	480	67.2269	no	203	86.7521	yes	31	13.2479	NA	NA	NA	NA	NA	NA	NA	NA	NA	NA	NA	NA
infant_rome_stool_freq_last_month	M1	6	503	70.4482	211	29.5518	0_<_once_wk	4	0.795229	1_1_2_times_wk	23	4.57256	2_3_7_times_wk	83	16.501	3_once_day	47	9.34394	4_2_3_times_day	151	30.0199	5_>3_times_day	195	38.7674
infant_rome_stool_freq_last_month	M2	6	474	66.3866	240	33.6134	0_<_once_wk	6	1.26582	1_1_2_times_wk	47	9.91561	2_3_7_times_wk	132	27.8481	3_once_day	75	15.8228	4_2_3_times_day	133	28.0591	5_>3_times_day	81	17.0886
infant_rome_stool_freq_last_month	M3	6	459	64.2857	255	35.7143	0_<_once_wk	6	1.30719	1_1_2_times_wk	57	12.4183	2_3_7_times_wk	156	33.9869	3_once_day	94	20.4793	4_2_3_times_day	95	20.6972	5_>3_times_day	51	11.1111
infant_rome_stool_freq_last_month	M6	6	349	48.8796	365	51.1204	0_<_once_wk	4	1.14613	1_1_2_times_wk	30	8.59599	2_3_7_times_wk	108	30.9456	3_once_day	98	28.0802	4_2_3_times_day	99	28.3668	5_>3_times_day	10	2.86533
infant_rome_stool_freq_last_month	M9	5	313	43.8375	401	56.1625	0_<_once_wk	0	0	1_1_2_times_wk	6	1.91693	2_3_7_times_wk	58	18.5304	3_once_day	72	23.0032	4_2_3_times_day	164	52.3962	5_>3_times_day	13	4.15335
infant_rome_stool_freq_last_month	M12	4	234	32.7731	480	67.2269	0_<_once_wk	0	0	1_1_2_times_wk	0	0	2_3_7_times_wk	30	12.8205	3_once_day	70	29.9145	4_2_3_times_day	129	55.1282	5_>3_times_day	5	2.13675
infant_rome_stool_structure	M1	6	505	70.7283	209	29.2717	0_very_hard	1	0.19802	1_hard	1	0.19802	2_not_hard_not_soft	67	13.2673	3_very_soft	4	0.792079	4_watery	257	50.8911	5_sometimes_hard_sometimes_soft	175	34.6535
infant_rome_stool_structure	M2	5	475	66.5266	239	33.4734	0_very_hard	1	0.210526	1_hard	0	0	2_not_hard_not_soft	59	12.4211	3_very_soft	10	2.10526	4_watery	272	57.2632	5_sometimes_hard_sometimes_soft	133	28
infant_rome_stool_structure	M3	5	459	64.2857	255	35.7143	0_very_hard	0	0	1_hard	1	0.217865	2_not_hard_not_soft	66	14.3791	3_very_soft	6	1.30719	4_watery	269	58.6057	5_sometimes_hard_sometimes_soft	117	25.4902
infant_rome_stool_structure	M6	5	349	48.8796	365	51.1204	0_very_hard	0	0	1_hard	20	5.73066	2_not_hard_not_soft	164	46.9914	3_very_soft	25	7.16332	4_watery	128	36.6762	5_sometimes_hard_sometimes_soft	12	3.4384
infant_rome_stool_structure	M9	6	313	43.8375	401	56.1625	0_very_hard	5	1.59744	1_hard	21	6.70927	2_not_hard_not_soft	211	67.4121	3_very_soft	26	8.30671	4_watery	45	14.377	5_sometimes_hard_sometimes_soft	5	1.59744
infant_rome_stool_structure	M12	5	234	32.7731	480	67.2269	0_very_hard	1	0.42735	1_hard	16	6.83761	2_not_hard_not_soft	171	73.0769	3_very_soft	13	5.55556	4_watery	33	14.1026	NA	NA	NA
infant_rome_mucus_stool_last_week	M1	5	484	67.7871	230	32.2129	0_never	397	82.0248	1_once	9	1.8595	2_on_and_off	48	9.91736	3_almost_always	21	4.33884	4_always	9	1.8595	NA	NA	NA
infant_rome_mucus_stool_last_week	M2	5	463	64.8459	251	35.1541	0_never	367	79.2657	1_once	22	4.75162	2_on_and_off	58	12.527	3_almost_always	8	1.72786	4_always	8	1.72786	NA	NA	NA
infant_rome_mucus_stool_last_week	M3	5	449	62.8852	265	37.1148	0_never	360	80.1782	1_once	23	5.12249	2_on_and_off	52	11.5813	3_almost_always	10	2.22717	4_always	4	0.890869	NA	NA	NA
infant_rome_mucus_stool_last_week	M6	4	345	48.3193	369	51.6807	0_never	304	88.1159	1_once	10	2.89855	2_on_and_off	29	8.4058	3_almost_always	2	0.57971	4_always	0	0	NA	NA	NA
infant_rome_mucus_stool_last_week	M9	4	307	42.9972	407	57.0028	0_never	283	92.1824	1_once	9	2.9316	2_on_and_off	14	4.56026	3_almost_always	1	0.325733	4_always	0	0	NA	NA	NA
infant_rome_mucus_stool_last_week	M12	4	234	32.7731	480	67.2269	0_never	208	88.8889	1_once	15	6.41026	2_on_and_off	10	4.2735	3_almost_always	1	0.42735	4_always	0	0	NA	NA	NA
infant_rome_sudden_inconsolable_crying_fits	M1	2	505	70.7283	209	29.2717	no	390	77.2277	yes	115	22.7723	NA	NA	NA	NA	NA	NA	NA	NA	NA	NA	NA	NA
infant_rome_sudden_inconsolable_crying_fits	M2	2	474	66.3866	240	33.6134	no	355	74.8945	yes	119	25.1055	NA	NA	NA	NA	NA	NA	NA	NA	NA	NA	NA	NA
infant_rome_sudden_inconsolable_crying_fits	M3	2	458	64.1457	256	35.8543	no	356	77.7293	yes	102	22.2707	NA	NA	NA	NA	NA	NA	NA	NA	NA	NA	NA	NA
infant_rome_sudden_inconsolable_crying_fits	M6	2	347	48.5994	367	51.4006	no	300	86.4553	yes	47	13.5447	NA	NA	NA	NA	NA	NA	NA	NA	NA	NA	NA	NA
infant_rome_sudden_inconsolable_crying_fits	M9	2	313	43.8375	401	56.1625	no	275	87.8594	yes	38	12.1406	NA	NA	NA	NA	NA	NA	NA	NA	NA	NA	NA	NA
infant_rome_sudden_inconsolable_crying_fits	M12	2	234	32.7731	480	67.2269	no	213	91.0256	yes	21	8.97436	NA	NA	NA	NA	NA	NA	NA	NA	NA	NA	NA	NA
infant_IGSQ_score_catg	M3	2	210	29.4118	504	70.5882	0_no_little_GI_distress	113	53.8095	1_medium_high_GI_distress	97	46.1905	NA	NA	NA	NA	NA	NA	NA	NA	NA	NA	NA	NA
infant_IGSQ_score_catg	M12	2	134	18.7675	580	81.2325	0_no_little_GI_distress	68	50.7463	1_medium_high_GI_distress	66	49.2537	NA	NA	NA	NA	NA	NA	NA	NA	NA	NA	NA	NA
infant_BITSS	W2	4	302	42.2969	412	57.7031	0_hard_stool	2	0.662252	1_formed_stool	24	7.94702	2_loose_stool	187	61.9205	3_watery_stool	89	29.4702	NA	NA	NA	NA	NA	NA
infant_BITSS	M1	4	388	54.3417	326	45.6583	0_hard_stool	5	1.28866	1_formed_stool	21	5.41237	2_loose_stool	239	61.5979	3_watery_stool	123	31.701	NA	NA	NA	NA	NA	NA
infant_BITSS	M2	4	405	56.7227	309	43.2773	0_hard_stool	2	0.493827	1_formed_stool	27	6.66667	2_loose_stool	276	68.1481	3_watery_stool	100	24.6914	NA	NA	NA	NA	NA	NA
infant_BITSS	M3	4	411	57.563	303	42.437	0_hard_stool	3	0.729927	1_formed_stool	24	5.83942	2_loose_stool	300	72.9927	3_watery_stool	84	20.438	NA	NA	NA	NA	NA	NA
infant_BITSS	M6	4	252	35.2941	462	64.7059	0_hard_stool	30	11.9048	1_formed_stool	95	37.6984	2_loose_stool	105	41.6667	3_watery_stool	22	8.73016	NA	NA	NA	NA	NA	NA
infant_BITSS	M9	4	235	32.9132	479	67.0868	0_hard_stool	35	14.8936	1_formed_stool	130	55.3191	2_loose_stool	63	26.8085	3_watery_stool	7	2.97872	NA	NA	NA	NA	NA	NA
infant_BITSS	M12	4	283	39.6359	431	60.3641	0_hard_stool	47	16.6078	1_formed_stool	147	51.9435	2_loose_stool	84	29.682	3_watery_stool	5	1.76678	NA	NA	NA	NA	NA	NA
infant_med_acid_related_disorders_A02	W2	2	248	34.7339	466	65.2661	no	247	99.5968	yes	1	0.403226	NA	NA	NA	NA	NA	NA	NA	NA	NA	NA	NA	NA
infant_med_acid_related_disorders_A02	M1	2	511	71.5686	203	28.4314	no	508	99.4129	yes	3	0.587084	NA	NA	NA	NA	NA	NA	NA	NA	NA	NA	NA	NA
infant_med_acid_related_disorders_A02	M2	2	479	67.0868	235	32.9132	no	471	98.3299	yes	8	1.67015	NA	NA	NA	NA	NA	NA	NA	NA	NA	NA	NA	NA
infant_med_acid_related_disorders_A02	M3	2	482	67.507	232	32.493	no	468	97.0954	yes	14	2.90456	NA	NA	NA	NA	NA	NA	NA	NA	NA	NA	NA	NA
infant_med_acid_related_disorders_A02	M6	2	348	48.7395	366	51.2605	no	344	98.8506	yes	4	1.14943	NA	NA	NA	NA	NA	NA	NA	NA	NA	NA	NA	NA
infant_med_acid_related_disorders_A02	M9	2	313	43.8375	401	56.1625	no	310	99.0415	yes	3	0.958466	NA	NA	NA	NA	NA	NA	NA	NA	NA	NA	NA	NA
infant_med_acid_related_disorders_A02	M12	2	234	32.7731	480	67.2269	no	233	99.5726	yes	1	0.42735	NA	NA	NA	NA	NA	NA	NA	NA	NA	NA	NA	NA
infant_med_analgesics_N02	W2	2	248	34.7339	466	65.2661	no	245	98.7903	yes	3	1.20968	NA	NA	NA	NA	NA	NA	NA	NA	NA	NA	NA	NA
infant_med_analgesics_N02	M1	2	511	71.5686	203	28.4314	no	491	96.0861	yes	20	3.91389	NA	NA	NA	NA	NA	NA	NA	NA	NA	NA	NA	NA
infant_med_analgesics_N02	M2	2	479	67.0868	235	32.9132	no	457	95.4071	yes	22	4.5929	NA	NA	NA	NA	NA	NA	NA	NA	NA	NA	NA	NA
infant_med_analgesics_N02	M3	2	482	67.507	232	32.493	no	424	87.9668	yes	58	12.0332	NA	NA	NA	NA	NA	NA	NA	NA	NA	NA	NA	NA
infant_med_analgesics_N02	M6	2	348	48.7395	366	51.2605	no	284	81.6092	yes	64	18.3908	NA	NA	NA	NA	NA	NA	NA	NA	NA	NA	NA	NA
infant_med_analgesics_N02	M9	2	313	43.8375	401	56.1625	no	252	80.5112	yes	61	19.4888	NA	NA	NA	NA	NA	NA	NA	NA	NA	NA	NA	NA
infant_med_analgesics_N02	M12	2	234	32.7731	480	67.2269	no	183	78.2051	yes	51	21.7949	NA	NA	NA	NA	NA	NA	NA	NA	NA	NA	NA	NA
infant_med_antibiotics_J01	W2	2	248	34.7339	466	65.2661	no	242	97.5806	yes	6	2.41935	NA	NA	NA	NA	NA	NA	NA	NA	NA	NA	NA	NA
infant_med_antibiotics_J01	M1	2	511	71.5686	203	28.4314	no	495	96.8689	yes	16	3.13112	NA	NA	NA	NA	NA	NA	NA	NA	NA	NA	NA	NA
infant_med_antibiotics_J01	M2	2	479	67.0868	235	32.9132	no	475	99.1649	yes	4	0.835073	NA	NA	NA	NA	NA	NA	NA	NA	NA	NA	NA	NA
infant_med_antibiotics_J01	M3	2	482	67.507	232	32.493	no	463	96.0581	yes	19	3.94191	NA	NA	NA	NA	NA	NA	NA	NA	NA	NA	NA	NA
infant_med_antibiotics_J01	M6	2	348	48.7395	366	51.2605	no	333	95.6897	yes	15	4.31034	NA	NA	NA	NA	NA	NA	NA	NA	NA	NA	NA	NA
infant_med_antibiotics_J01	M9	2	313	43.8375	401	56.1625	no	292	93.2907	yes	21	6.70927	NA	NA	NA	NA	NA	NA	NA	NA	NA	NA	NA	NA
infant_med_antibiotics_J01	M12	2	234	32.7731	480	67.2269	no	213	91.0256	yes	21	8.97436	NA	NA	NA	NA	NA	NA	NA	NA	NA	NA	NA	NA
infant_med_cinababy	W2	2	248	34.7339	466	65.2661	no	246	99.1935	yes	2	0.806452	NA	NA	NA	NA	NA	NA	NA	NA	NA	NA	NA	NA
infant_med_cinababy	M1	2	511	71.5686	203	28.4314	no	509	99.6086	yes	2	0.391389	NA	NA	NA	NA	NA	NA	NA	NA	NA	NA	NA	NA
infant_med_cinababy	M2	2	479	67.0868	235	32.9132	no	474	98.9562	yes	5	1.04384	NA	NA	NA	NA	NA	NA	NA	NA	NA	NA	NA	NA
infant_med_cinababy	M3	2	482	67.507	232	32.493	no	479	99.3776	yes	3	0.622407	NA	NA	NA	NA	NA	NA	NA	NA	NA	NA	NA	NA
infant_med_cinababy	M6	2	348	48.7395	366	51.2605	no	347	99.7126	yes	1	0.287356	NA	NA	NA	NA	NA	NA	NA	NA	NA	NA	NA	NA
infant_med_cinababy	M9	2	313	43.8375	401	56.1625	no	309	98.722	yes	4	1.27796	NA	NA	NA	NA	NA	NA	NA	NA	NA	NA	NA	NA
infant_med_cinababy	M12	1	234	32.7731	480	67.2269	no	234	100	NA	NA	NA	NA	NA	NA	NA	NA	NA	NA	NA	NA	NA	NA	NA
infant_med_dermato_corticosteroids_D07	W2	2	248	34.7339	466	65.2661	no	247	99.5968	yes	1	0.403226	NA	NA	NA	NA	NA	NA	NA	NA	NA	NA	NA	NA
infant_med_dermato_corticosteroids_D07	M1	1	511	71.5686	203	28.4314	no	511	100	yes	0	0	NA	NA	NA	NA	NA	NA	NA	NA	NA	NA	NA	NA
infant_med_dermato_corticosteroids_D07	M2	2	479	67.0868	235	32.9132	no	478	99.7912	yes	1	0.208768	NA	NA	NA	NA	NA	NA	NA	NA	NA	NA	NA	NA
infant_med_dermato_corticosteroids_D07	M3	2	482	67.507	232	32.493	no	470	97.5104	yes	12	2.48963	NA	NA	NA	NA	NA	NA	NA	NA	NA	NA	NA	NA
infant_med_dermato_corticosteroids_D07	M6	2	348	48.7395	366	51.2605	no	331	95.1149	yes	17	4.88506	NA	NA	NA	NA	NA	NA	NA	NA	NA	NA	NA	NA
infant_med_dermato_corticosteroids_D07	M9	2	313	43.8375	401	56.1625	no	293	93.6102	yes	20	6.38978	NA	NA	NA	NA	NA	NA	NA	NA	NA	NA	NA	NA
infant_med_dermato_corticosteroids_D07	M12	2	234	32.7731	480	67.2269	no	221	94.4444	yes	13	5.55556	NA	NA	NA	NA	NA	NA	NA	NA	NA	NA	NA	NA
infant_med_dermato_miconazole	W2	2	248	34.7339	466	65.2661	no	246	99.1935	yes	2	0.806452	NA	NA	NA	NA	NA	NA	NA	NA	NA	NA	NA	NA
infant_med_dermato_miconazole	M1	2	511	71.5686	203	28.4314	no	502	98.2387	yes	9	1.76125	NA	NA	NA	NA	NA	NA	NA	NA	NA	NA	NA	NA
infant_med_dermato_miconazole	M2	2	479	67.0868	235	32.9132	no	474	98.9562	yes	5	1.04384	NA	NA	NA	NA	NA	NA	NA	NA	NA	NA	NA	NA
infant_med_dermato_miconazole	M3	2	482	67.507	232	32.493	no	477	98.9627	yes	5	1.03734	NA	NA	NA	NA	NA	NA	NA	NA	NA	NA	NA	NA
infant_med_dermato_miconazole	M6	2	348	48.7395	366	51.2605	no	342	98.2759	yes	6	1.72414	NA	NA	NA	NA	NA	NA	NA	NA	NA	NA	NA	NA
infant_med_dermato_miconazole	M9	2	313	43.8375	401	56.1625	no	309	98.722	yes	4	1.27796	NA	NA	NA	NA	NA	NA	NA	NA	NA	NA	NA	NA
infant_med_dermato_miconazole	M12	2	234	32.7731	480	67.2269	no	232	99.1453	yes	2	0.854701	NA	NA	NA	NA	NA	NA	NA	NA	NA	NA	NA	NA
infant_med_infacol_simeticone_A03AX13	W2	2	248	34.7339	466	65.2661	no	235	94.7581	yes	13	5.24194	NA	NA	NA	NA	NA	NA	NA	NA	NA	NA	NA	NA
infant_med_infacol_simeticone_A03AX13	M1	2	511	71.5686	203	28.4314	no	471	92.1722	yes	40	7.82779	NA	NA	NA	NA	NA	NA	NA	NA	NA	NA	NA	NA
infant_med_infacol_simeticone_A03AX13	M2	2	479	67.0868	235	32.9132	no	455	94.9896	yes	24	5.01044	NA	NA	NA	NA	NA	NA	NA	NA	NA	NA	NA	NA
infant_med_infacol_simeticone_A03AX13	M3	2	482	67.507	232	32.493	no	466	96.6805	yes	16	3.3195	NA	NA	NA	NA	NA	NA	NA	NA	NA	NA	NA	NA
infant_med_infacol_simeticone_A03AX13	M6	2	348	48.7395	366	51.2605	no	344	98.8506	yes	4	1.14943	NA	NA	NA	NA	NA	NA	NA	NA	NA	NA	NA	NA
infant_med_infacol_simeticone_A03AX13	M9	2	313	43.8375	401	56.1625	no	312	99.6805	yes	1	0.319489	NA	NA	NA	NA	NA	NA	NA	NA	NA	NA	NA	NA
infant_med_infacol_simeticone_A03AX13	M12	2	234	32.7731	480	67.2269	no	233	99.5726	yes	1	0.42735	NA	NA	NA	NA	NA	NA	NA	NA	NA	NA	NA	NA
infant_med_iron_preparations_B03A	W2	2	248	34.7339	466	65.2661	no	245	98.7903	yes	3	1.20968	NA	NA	NA	NA	NA	NA	NA	NA	NA	NA	NA	NA
infant_med_iron_preparations_B03A	M1	2	511	71.5686	203	28.4314	no	508	99.4129	yes	3	0.587084	NA	NA	NA	NA	NA	NA	NA	NA	NA	NA	NA	NA
infant_med_iron_preparations_B03A	M2	2	479	67.0868	235	32.9132	no	475	99.1649	yes	4	0.835073	NA	NA	NA	NA	NA	NA	NA	NA	NA	NA	NA	NA
infant_med_iron_preparations_B03A	M3	2	482	67.507	232	32.493	no	479	99.3776	yes	3	0.622407	NA	NA	NA	NA	NA	NA	NA	NA	NA	NA	NA	NA
infant_med_iron_preparations_B03A	M6	2	348	48.7395	366	51.2605	no	345	99.1379	yes	3	0.862069	NA	NA	NA	NA	NA	NA	NA	NA	NA	NA	NA	NA
infant_med_iron_preparations_B03A	M9	2	313	43.8375	401	56.1625	no	312	99.6805	yes	1	0.319489	NA	NA	NA	NA	NA	NA	NA	NA	NA	NA	NA	NA
infant_med_iron_preparations_B03A	M12	1	234	32.7731	480	67.2269	no	234	100	yes	0	0	NA	NA	NA	NA	NA	NA	NA	NA	NA	NA	NA	NA
infant_med_locust_bean_gum	W2	1	248	34.7339	466	65.2661	no	248	100	yes	0	0	NA	NA	NA	NA	NA	NA	NA	NA	NA	NA	NA	NA
infant_med_locust_bean_gum	M1	2	511	71.5686	203	28.4314	no	502	98.2387	yes	9	1.76125	NA	NA	NA	NA	NA	NA	NA	NA	NA	NA	NA	NA
infant_med_locust_bean_gum	M2	2	479	67.0868	235	32.9132	no	465	97.0772	yes	14	2.92276	NA	NA	NA	NA	NA	NA	NA	NA	NA	NA	NA	NA
infant_med_locust_bean_gum	M3	2	482	67.507	232	32.493	no	453	93.9834	yes	29	6.0166	NA	NA	NA	NA	NA	NA	NA	NA	NA	NA	NA	NA
infant_med_locust_bean_gum	M6	2	348	48.7395	366	51.2605	no	344	98.8506	yes	4	1.14943	NA	NA	NA	NA	NA	NA	NA	NA	NA	NA	NA	NA
infant_med_locust_bean_gum	M9	2	313	43.8375	401	56.1625	no	310	99.0415	yes	3	0.958466	NA	NA	NA	NA	NA	NA	NA	NA	NA	NA	NA	NA
infant_med_locust_bean_gum	M12	2	234	32.7731	480	67.2269	no	233	99.5726	yes	1	0.42735	NA	NA	NA	NA	NA	NA	NA	NA	NA	NA	NA	NA
infant_med_nystatine_A07AA02	W2	2	248	34.7339	466	65.2661	no	234	94.3548	yes	14	5.64516	NA	NA	NA	NA	NA	NA	NA	NA	NA	NA	NA	NA
infant_med_nystatine_A07AA02	M1	2	511	71.5686	203	28.4314	no	481	94.1292	yes	30	5.87084	NA	NA	NA	NA	NA	NA	NA	NA	NA	NA	NA	NA
infant_med_nystatine_A07AA02	M2	2	479	67.0868	235	32.9132	no	456	95.1983	yes	23	4.80167	NA	NA	NA	NA	NA	NA	NA	NA	NA	NA	NA	NA
infant_med_nystatine_A07AA02	M3	2	482	67.507	232	32.493	no	448	92.9461	yes	34	7.05394	NA	NA	NA	NA	NA	NA	NA	NA	NA	NA	NA	NA
infant_med_nystatine_A07AA02	M6	2	348	48.7395	366	51.2605	no	345	99.1379	yes	3	0.862069	NA	NA	NA	NA	NA	NA	NA	NA	NA	NA	NA	NA
infant_med_nystatine_A07AA02	M9	2	313	43.8375	401	56.1625	no	312	99.6805	yes	1	0.319489	NA	NA	NA	NA	NA	NA	NA	NA	NA	NA	NA	NA
infant_med_nystatine_A07AA02	M12	1	234	32.7731	480	67.2269	no	234	100	yes	0	0	NA	NA	NA	NA	NA	NA	NA	NA	NA	NA	NA	NA
infant_med_osmotically_acting_laxatives_A06AD	W2	1	248	34.7339	466	65.2661	no	248	100	yes	0	0	NA	NA	NA	NA	NA	NA	NA	NA	NA	NA	NA	NA
infant_med_osmotically_acting_laxatives_A06AD	M1	2	511	71.5686	203	28.4314	no	506	99.0215	yes	5	0.978474	NA	NA	NA	NA	NA	NA	NA	NA	NA	NA	NA	NA
infant_med_osmotically_acting_laxatives_A06AD	M2	2	479	67.0868	235	32.9132	no	470	98.1211	yes	9	1.87891	NA	NA	NA	NA	NA	NA	NA	NA	NA	NA	NA	NA
infant_med_osmotically_acting_laxatives_A06AD	M3	2	482	67.507	232	32.493	no	473	98.1328	yes	9	1.86722	NA	NA	NA	NA	NA	NA	NA	NA	NA	NA	NA	NA
infant_med_osmotically_acting_laxatives_A06AD	M6	2	348	48.7395	366	51.2605	no	338	97.1264	yes	10	2.87356	NA	NA	NA	NA	NA	NA	NA	NA	NA	NA	NA	NA
infant_med_osmotically_acting_laxatives_A06AD	M9	2	313	43.8375	401	56.1625	no	303	96.8051	yes	10	3.19489	NA	NA	NA	NA	NA	NA	NA	NA	NA	NA	NA	NA
infant_med_osmotically_acting_laxatives_A06AD	M12	2	234	32.7731	480	67.2269	no	228	97.4359	yes	6	2.5641	NA	NA	NA	NA	NA	NA	NA	NA	NA	NA	NA	NA
infant_med_probiotics	W2	2	248	34.7339	466	65.2661	no	247	99.5968	yes	1	0.403226	NA	NA	NA	NA	NA	NA	NA	NA	NA	NA	NA	NA
infant_med_probiotics	M1	2	511	71.5686	203	28.4314	no	509	99.6086	yes	2	0.391389	NA	NA	NA	NA	NA	NA	NA	NA	NA	NA	NA	NA
infant_med_probiotics	M2	2	479	67.0868	235	32.9132	no	473	98.7474	yes	6	1.25261	NA	NA	NA	NA	NA	NA	NA	NA	NA	NA	NA	NA
infant_med_probiotics	M3	2	482	67.507	232	32.493	no	475	98.5477	yes	7	1.45228	NA	NA	NA	NA	NA	NA	NA	NA	NA	NA	NA	NA
infant_med_probiotics	M6	2	348	48.7395	366	51.2605	no	347	99.7126	yes	1	0.287356	NA	NA	NA	NA	NA	NA	NA	NA	NA	NA	NA	NA
infant_med_probiotics	M9	2	313	43.8375	401	56.1625	no	311	99.361	yes	2	0.638978	NA	NA	NA	NA	NA	NA	NA	NA	NA	NA	NA	NA
infant_med_probiotics	M12	1	234	32.7731	480	67.2269	no	234	100	yes	0	0	NA	NA	NA	NA	NA	NA	NA	NA	NA	NA	NA	NA
infant_med_vitaminD	W2	2	250	35.014	464	64.986	no	2	0.8	yes	248	99.2	NA	NA	NA	NA	NA	NA	NA	NA	NA	NA	NA	NA
infant_med_vitaminD	M1	2	514	71.9888	200	28.0112	no	4	0.77821	yes	510	99.2218	NA	NA	NA	NA	NA	NA	NA	NA	NA	NA	NA	NA
infant_med_vitaminD	M2	2	555	77.7311	159	22.2689	no	45	8.10811	yes	510	91.8919	NA	NA	NA	NA	NA	NA	NA	NA	NA	NA	NA	NA
infant_med_vitaminD	M3	2	482	67.507	232	32.493	no	32	6.639	yes	450	93.361	NA	NA	NA	NA	NA	NA	NA	NA	NA	NA	NA	NA
infant_med_vitaminD	M6	2	351	49.1597	363	50.8403	no	14	3.9886	yes	337	96.0114	NA	NA	NA	NA	NA	NA	NA	NA	NA	NA	NA	NA
infant_med_vitaminD	M9	2	323	45.2381	391	54.7619	no	16	4.95356	yes	307	95.0464	NA	NA	NA	NA	NA	NA	NA	NA	NA	NA	NA	NA
infant_med_vitaminD	M12	2	234	32.7731	480	67.2269	no	18	7.69231	yes	216	92.3077	NA	NA	NA	NA	NA	NA	NA	NA	NA	NA	NA	NA
infant_med_vitaminK	W2	2	248	34.7339	466	65.2661	no	40	16.129	yes	208	83.871	NA	NA	NA	NA	NA	NA	NA	NA	NA	NA	NA	NA
infant_med_vitaminK	M1	2	511	71.5686	203	28.4314	no	112	21.9178	yes	399	78.0822	NA	NA	NA	NA	NA	NA	NA	NA	NA	NA	NA	NA
infant_med_vitaminK	M2	2	533	74.6499	181	25.3501	no	134	25.1407	yes	399	74.8593	NA	NA	NA	NA	NA	NA	NA	NA	NA	NA	NA	NA
infant_med_vitaminK	M3	2	482	67.507	232	32.493	no	312	64.7303	yes	170	35.2697	NA	NA	NA	NA	NA	NA	NA	NA	NA	NA	NA	NA
infant_med_vitaminK	M6	1	348	48.7395	366	51.2605	no	348	100	NA	NA	NA	NA	NA	NA	NA	NA	NA	NA	NA	NA	NA	NA	NA
infant_med_vitaminK	M9	1	313	43.8375	401	56.1625	no	313	100	NA	NA	NA	NA	NA	NA	NA	NA	NA	NA	NA	NA	NA	NA	NA
infant_med_vitaminK	M12	2	234	32.7731	480	67.2269	no	233	99.5726	yes	1	0.42735	NA	NA	NA	NA	NA	NA	NA	NA	NA	NA	NA	NA
infant_sleep_pattern_problem	M3	3	252	35.2941	462	64.7059	0_no_problem	197	78.1746	1_small_problem	50	19.8413	2_big_problem	5	1.98413	NA	NA	NA	NA	NA	NA	NA	NA	NA
infant_sleep_pattern_problem	M6	3	205	28.7115	509	71.2885	0_no_problem	144	70.2439	1_small_problem	57	27.8049	2_big_problem	4	1.95122	NA	NA	NA	NA	NA	NA	NA	NA	NA
infant_sleep_pattern_problem	M12	3	135	18.9076	579	81.0924	0_no_problem	110	81.4815	1_small_problem	23	17.037	2_big_problem	2	1.48148	NA	NA	NA	NA	NA	NA	NA	NA	NA

## Sheet: Table S7.
Table S7. Summary statistics of cross-sectional, numeric metadata linked with mother gut microbiome
Phenotype	Total Sample Size, N	Percentage Total N, %	Total Missings, N	Percentage Total Missings, %	Mean	Standard Deviation	Min	Q1	Median	Q3	Max
mother_lifelinesbirthcards_prepreg_bmi_kg_m2	409	58.1792	294	41.8208	23.8957	4.10583	16.94	21.21	22.99	25.61	43.37
mother_health_age_menarche_p18	206	29.303	497	70.697	12.7282	1.7062	9	11	13	14	19
mother_health_number_of_coitus_partners_p18	381	54.1963	322	45.8037	4.90289	6.09171	1	1	3	6	40
mother_health_smoking_duration_p18	130	18.4922	573	81.5078	11.8769	5.39166	1	8	12	15	27
mother_food_pref_broccoli_preg	544	77.3826	159	22.6174	5.95495	1.94733	0	5	5.92792	7	10
mother_food_pref_crisps_preg	545	77.5249	158	22.4751	6.51143	1.98954	0	5	7	8	10
mother_food_pref_bacon_preg	501	71.266	202	28.734	4.21933	2.2056	0	2.64059	5	5	10
mother_food_pref_shrimps_preg	468	66.5718	235	33.4282	3.9779	2.84123	0	1	4.98458	6	10
mother_food_pref_butter_preg	545	77.5249	158	22.4751	5.67544	1.7041	0	5	5	7	10
mother_food_pref_fries_preg	544	77.3826	159	22.6174	6.33912	1.83797	0	5	6.29211	8	10
mother_food_pref_wholegrain_bread_preg	544	77.3826	159	22.6174	6.66917	2.141	0	5	7	8	10
mother_food_pref_blue_cheese_preg	471	66.9986	232	33.0014	2.95873	2.83645	0	0	2	5	10
mother_food_pref_skimmed_milk_preg	497	70.697	206	29.303	4.06936	2.5406	0	2	4.94293	5	10
mother_food_pref_fresh_tomatoes_preg	532	75.6757	171	24.3243	6.09339	2.18501	0	5	6	8	10
mother_food_pref_black_coffee_preg	495	70.4125	208	29.5875	3.16142	3.14941	0	0	2	5.6484	10
mother_food_pref_pizza_preg	544	77.3826	159	22.6174	6.41694	1.92063	0	5	6.90812	8	10
mother_food_pref_plain_yoghurt_preg	538	76.5292	165	23.4708	5.94289	2.1971	0	5	6	7.23983	10
mother_food_pref_fried_chicken_preg	493	70.128	210	29.872	4.0243	2.17507	0	2.02949	4.65973	5	10
mother_food_pref_spicy_food_preg	503	71.5505	200	28.4495	2.83385	2.27318	0	1	2.40808	5	10
mother_food_pref_bread_preg	541	76.9559	162	23.0441	5.6784	1.84437	0	5	5.31899	7	10
mother_food_pref_sausages_preg	526	74.8222	177	25.1778	4.59142	2.05209	0	3.14952	5	6	10
mother_food_pref_soy_sauce_preg	478	67.9943	225	32.0057	4.66813	1.96767	0	4	5	6	10
mother_food_pref_carbonated_or_sweet_drinks_preg	537	76.3869	166	23.6131	5.07722	2.36784	0	4	5	7	10
mother_food_pref_salty_pretzels_preg	503	71.5505	200	28.4495	4.9112	2.06789	0	4	5	6	10
mother_food_pref_fresh_coriander_preg	463	65.8606	240	34.1394	3.87042	2.63325	0	1	4.88456	5	10
mother_food_pref_pasta_noodles_preg	544	77.3826	159	22.6174	6.21977	1.76548	0	5	6	8	10
mother_food_pref_mayonnaise_preg	542	77.0982	161	22.9018	5.72657	1.68442	0	5	5.31379	7	10
mother_food_pref_chile_pepper_preg	485	68.99	218	31.01	3.75908	2.30097	0	2	4	5	10
mother_food_pref_whole_milk_preg	500	71.1238	203	28.8762	4.55878	2.54314	0	3	5	6	10
mother_food_pref_roasted_chicken_preg	512	72.8307	191	27.1693	5.15736	2.03888	0	5	5	7	10
mother_food_pref_olives_preg	508	72.2617	195	27.7383	4.65448	2.77492	0	2.43048	5	7	10
mother_food_pref_dark_chocolate_preg	530	75.3912	173	24.6088	5.5442	2.3588	0	5	5.01427	7	10
mother_food_pref_garlic_preg	539	76.6714	164	23.3286	5.65121	2.0578	0	5	5.29185	7	10
mother_food_pref_ketchup_preg	529	75.2489	174	24.7511	5.04681	1.85967	0	5	5	6	9
mother_food_pref_ice_cream_preg	541	76.9559	162	23.0441	6.08222	2.04333	0	5	6	8	10
mother_food_pref_grapefruit_preg	478	67.9943	225	32.0057	4.25289	2.37748	0	2.63703	5	5.51526	10
mother_food_pref_cereal_preg	461	65.5761	242	34.4239	3.99894	2.27025	0	2.15617	4.70251	5	10
mother_food_pref_white_rice_preg	535	76.1024	168	23.8976	5.14796	1.8486	0	5	5	6	10
mother_food_pref_salad_dressing_preg	532	75.6757	171	24.3243	5.2114	1.78166	0	5	5	6	10
mother_food_pref_fried_fish_preg	514	73.1152	189	26.8848	4.90043	2.38854	0	3.71507	5	6.40745	10
mother_food_pref_banana_preg	539	76.6714	164	23.3286	6.24634	2.14557	0	5	6.8991	8	10
mother_food_pref_pork_chop_preg	500	71.1238	203	28.8762	4.09563	2.31325	0	2	5	5.54124	10
mother_food_pref_lentils_beans_preg	523	74.3954	180	25.6046	5.05855	2.1264	0	4	5	6	10
mother_food_pref_red_wine_preg	437	62.1622	266	37.8378	3.52626	3.12433	0	0	3	6	10
mother_food_pref_pear_preg	531	75.5334	172	24.4666	6.28659	1.96003	0	5	6.22761	8	10
mother_food_pref_glaze_preg	484	68.8478	219	31.1522	4.23325	2.26832	0	2.88439	5	5.98231	10
mother_food_pref_potato_preg	541	76.9559	162	23.0441	5.80238	1.95375	0	5	6	7	10
mother_food_pref_melon_yellow_or_green_preg	534	75.9602	169	24.0398	6.46779	1.93005	0	5	6.821	8	10
mother_food_pref_sauted_mushrooms_preg	534	75.9602	169	24.0398	5.60532	2.48861	0	5	6	7	10
mother_food_pref_olive_oil_preg	540	76.8137	163	23.1863	5.7413	1.61925	0	5	5	7	10
mother_food_pref_asparagus_preg	482	68.5633	221	31.4367	5.23737	2.47919	0	4.31213	5	7	10
mother_food_pref_raw_carrot_preg	530	75.3912	173	24.6088	5.66462	2.1529	0	5	6	7	10
mother_food_pref_jam_preg	530	75.3912	173	24.6088	5.44063	1.72917	0	5	5.18097	7	9
mother_food_pref_white_wine_preg	439	62.4467	264	37.5533	3.74634	2.97754	0	1	4	6	10
mother_food_pref_lemon_preg	518	73.6842	185	26.3158	5.32272	1.92373	0	5	5	6	10
mother_food_pref_oatmeal_preg	484	68.8478	219	31.1522	5.04714	2.46454	0	4	5	7	10
mother_food_pref_cherries_preg	505	71.835	198	28.165	5.63087	2.2076	0	5	5.31132	7	10
mother_food_pref_vinegar_preg	500	71.1238	203	28.8762	3.97	2.00257	0	2.62213	4.73843	5	10
mother_food_pref_coffee_tea_with_sugar_preg	497	70.697	206	29.303	2.32711	2.49477	0	0	1.3087	4	10
mother_food_pref_beetroot_preg	520	73.9687	183	26.0313	5.47092	2.16349	0	5	5	7	10
mother_food_pref_wasabi_horseradish_preg	375	53.3428	328	46.6572	3.21038	2.37928	0	1	3.18548	5	9
mother_food_pref_tuna_or_salmon_preg	497	70.697	206	29.303	5.12267	3.00494	0	3	5.25341	7	10
mother_food_pref_cookies_pastry_preg	543	77.2404	160	22.7596	6.88571	1.93381	0	5	7	8	10
mother_food_pref_ham_preg	522	74.2532	181	25.7468	4.90861	2.08733	0	4	5	6	10
mother_food_pref_granola_bar_preg	525	74.6799	178	25.3201	5.17741	1.84937	0	5	5	6	10
mother_food_pref_strawberries_preg	541	76.9559	162	23.0441	7.29983	1.84133	0	6	7.81109	9	10
mother_food_pref_saltines_preg	541	76.9559	162	23.0441	6.63595	1.65228	0	5	7	8	10
mother_food_pref_pickles_preg	528	75.1067	175	24.8933	5.38339	2.20691	0	5	5	7	10
mother_food_pref_spinach_vegetables_preg	544	77.3826	159	22.6174	6.80207	1.87945	0	5	7	8	10
mother_food_pref_pineapple_preg	534	75.9602	169	24.0398	6.43381	2.24277	0	5	7	8	10
mother_food_pref_hot_tea_preg	542	77.0982	161	22.9018	6.54896	2.15445	0	5	7	8	10
mother_food_pref_cheesecake_preg	535	76.1024	168	23.8976	6.63518	1.88281	0	5	7	8	10
mother_food_pref_add_salt_to_food_preg	530	75.3912	173	24.6088	5.01713	2.2861	0	4	5	6.88212	10
mother_food_pref_bbq_meat_preg	514	73.1152	189	26.8848	4.62838	2.24839	0	3	5	6	10
mother_food_pref_eggplant_preg	491	69.8435	212	30.1565	4.77382	2.13276	0	4	5	6	10
mother_food_pref_cheddar_cheese_preg	478	67.9943	225	32.0057	4.42757	2.21711	0	3	5	6	10
mother_food_pref_tabasco_sauce_preg	384	54.623	319	45.377	2.8816	2.23291	0	1	3	5	9
mother_food_pref_raw_onion_preg	519	73.8265	184	26.1735	3.65288	2.35433	0	1.77702	4	5	10
mother_food_pref_orange_juice_preg	543	77.2404	160	22.7596	6.32969	2.17648	0	5	6	8	10
mother_food_pref_sweet_coffee_drinks_with_whipped_cream_preg	481	68.4211	222	31.5789	3.10147	2.64857	0	0	3	5	10
mother_food_pref_black_pepper_preg	516	73.3997	187	26.6003	5.09845	2.0761	0	5	5	6	10
mother_food_pref_artificial_meat_products_preg	464	66.0028	239	33.9972	3.35399	2.4024	0	1	4	5	10
mother_food_pref_indian_food_preg	473	67.2831	230	32.7169	4.94975	2.32932	0	3.87385	5	6	10
mother_food_pref_dietary_drinks_preg	493	70.128	210	29.872	3.65804	2.68651	0	1	4	5	10
mother_food_pref_unsalted_peanuts_preg	522	74.2532	181	25.7468	4.89624	1.89517	0	4	5	6	10
mother_food_pref_steak_preg	487	69.2745	216	30.7255	4.70614	2.81642	0	2.54384	5	7	10
mother_food_pref_eggs_preg	543	77.2404	160	22.7596	6.23355	1.99525	0	5	6	8	10
mother_food_pref_soya_milk_preg	379	53.9118	324	46.0882	3.2636	2.4211	0	1	3.07792	5	10
mother_food_pref_sweeteners_in_coffee_tea_preg	377	53.6273	326	46.3727	1.85913	2.2576	0	0	1	3.52028	10
mother_birthcard_preg_weight_gain_kg	47	6.68563	656	93.3144	12.8085	4.42639	5	10	13	16	21
mother_birthcardself_gestational_age_weeks	703	100	0	0	39.56	1.62367	29.8571	38.7143	39.8571	40.7143	43
mother_birthcard_duration_water_broken_min	455	64.7226	248	35.2774	587.611	2432.71	0	68.5	255	603.5	49877
mother_birthcard_duration_water_broken_hrs	455	64.7226	248	35.2774	9.79352	40.5452	0	1.14167	4.25	10.0583	831.283
mother_birthcard_del_rupture_grade	419	59.6017	284	40.3983	0.887828	0.972994	0	0	1	2	4
infant_birthcard_apgar_score_1min	490	69.7013	213	30.2987	8.67143	1.17759	1	9	9	9	10
infant_birthcard_apgar_score_5min	492	69.9858	211	30.0142	9.57927	0.891129	3	9	10	10	10
infant_birthcard_apgar_score_10min	432	61.4509	271	38.5491	9.83796	0.579338	4	10	10	10	10
birth_birthcard_total_duration_delivery_min	185	26.3158	518	73.6842	403.584	286.21	46	211	322	518	1911
birth_birthcard_duration_active_deliberate_pushing_min	267	37.9801	436	62.0199	36.3521	36.2639	1	8	25	54.5	203
mother_birthcard_age_at_delivery	696	99.0043	7	0.995733	32.4253	3.94497	21	30	32	35	43
mother_ffq_aMED_score	247	35.1351	456	64.8649	4.01215	1.88809	0	3	4	5	8
mother_ffq_energy_kcal_m2	247	35.1351	456	64.8649	2205.5	579.225	670.83	1830.25	2213.49	2569.04	3926.95
mother_ffq_group_alcohol_ml_per_day_m2	247	35.1351	456	64.8649	16.7636	41.3464	0	0	0	17.8	404.2
mother_ffq_group_cereals_grams_per_day_m2	247	35.1351	456	64.8649	15.4079	20.6393	0	0	6.1	25.045	104.54
mother_ffq_group_cheese_grams_per_day_m2	247	35.1351	456	64.8649	24.9055	23.5047	0	9.26	19.87	33.94	252.8
mother_ffq_group_coffee_ml_per_day_m2	247	35.1351	456	64.8649	193.732	199.157	0	0	140.13	280.26	840.79
mother_ffq_group_dairy_grams_per_day_m2	247	35.1351	456	64.8649	344.173	231.64	0	177.165	310.58	493.37	1618.39
mother_ffq_group_eggs_grams_per_day_m2	247	35.1351	456	64.8649	17.3178	18.2126	0	7	14	21.5	106.5
mother_ffq_group_fats_and_oils_grams_per_day_m2	247	35.1351	456	64.8649	26.6009	15.479	1.76	15.385	24.32	35.07	84.92
mother_ffq_group_fish_seafood_grams_per_day_m2	247	35.1351	456	64.8649	13.0376	12.1643	0	4.73	11.05	16.865	72.62
mother_ffq_group_fruits_grams_per_day_m2	247	35.1351	456	64.8649	167.612	94.2522	0	94.89	180.38	227.93	461.04
mother_ffq_group_legumes_grams_per_day_m2	247	35.1351	456	64.8649	51.3806	64.3939	0	20.41	31.75	59.805	480.89
mother_ffq_group_meat_grams_per_day_m2	247	35.1351	456	64.8649	87.9062	46.4187	0	59.555	88.42	121.81	222.08
mother_ffq_group_meat_substitute_grams_per_day_m2	247	35.1351	456	64.8649	5.12227	10.8184	0	0	0	5.775	62.83
mother_ffq_group_nonrefined_high_fiber_breads_grams_per_day_m2	247	35.1351	456	64.8649	111.096	65.2339	0	67.565	105.94	148.09	457.89
mother_ffq_group_nuts_and_seeds_grams_per_day_m2	247	35.1351	456	64.8649	17.6822	17.6055	0	4.35	13.34	25.16	112.33
mother_ffq_group_pasta_grams_per_day_m2	247	35.1351	456	64.8649	33.8207	23.9901	0	16.19	26.08	51.27	154.69
mother_ffq_group_pastry_grams_per_day_m2	247	35.1351	456	64.8649	40.0208	28.8356	0	21.33	34.2	53.885	157.71
mother_ffq_group_potatoes_grams_per_day_m2	247	35.1351	456	64.8649	59.0698	34.0997	0	34.1	57.15	78.24	212.5
mother_ffq_group_prepared_meal_grams_per_day_m2	247	35.1351	456	64.8649	58.0695	34.8536	0	33.71	53.99	75.095	188
mother_ffq_group_refined_white_breads_grams_per_day_m2	247	35.1351	456	64.8649	22.657	21.951	0	7.73	16.3	30.065	151.51
mother_ffq_group_rice_grams_per_day_m2	247	35.1351	456	64.8649	25.3156	21.3139	0	11.12	20.02	32.25	126.8
mother_ffq_group_sandwich_fillers_grams_per_day_m2	247	35.1351	456	64.8649	3.69599	6.71911	0	0	0	4.8	42.9
mother_ffq_group_sauces_condiments_grams_per_day_m2	247	35.1351	456	64.8649	18.0339	16.018	0	6.055	12.67	26.255	71.12
mother_ffq_group_savoury_snacks_grams_per_day_m2	247	35.1351	456	64.8649	22.0956	28.9092	0	5.3	13.29	28.865	254.14
mother_ffq_group_sugar_sweets_grams_per_day_m2	247	35.1351	456	64.8649	34.1328	26.8858	0	14.455	27.85	47.76	203.28
mother_ffq_group_sweet_drinks_and_no_or_low_alc_drinks_ml_per_day_m2	247	35.1351	456	64.8649	219.608	256.535	0	41.515	136.56	294.62	1622.24
mother_ffq_group_tea_ml_per_day_m2	247	35.1351	456	64.8649	511.81	415.307	0	169.995	509.99	680	2040
mother_ffq_group_vegetables_grams_per_day_m2	247	35.1351	456	64.8649	138.312	81.9296	0	81.12	119.75	184.87	501.03
mother_ffq_group_water_ml_per_day_m2	247	35.1351	456	64.8649	719.781	449.682	0	340	680	1020	2040
mother_ffq_nutrients_ALA_m2	247	35.1351	456	64.8649	1.92	0.739922	0.36	1.4	1.83	2.36	4.31
mother_ffq_nutrients_alcohol_total_m2	247	35.1351	456	64.8649	1.67381	2.91072	0	0.01	0.49	2.225	23.55
mother_ffq_nutrients_beta_carotene_m2	247	35.1351	456	64.8649	4067.87	2307.47	113.09	2449.81	3592.71	5680.74	12345.2
mother_ffq_nutrients_calcium_m2	247	35.1351	456	64.8649	1051.16	361.886	372.89	814.825	1023.68	1286.26	2629.97
mother_ffq_nutrients_cholesterol_m2	247	35.1351	456	64.8649	225.119	91.5283	60.6	166.955	207.91	271.745	589.53
mother_ffq_nutrients_DHA_m2	247	35.1351	456	64.8649	0.0894332	0.0889944	0	0.025	0.07	0.13	0.52
mother_ffq_nutrients_protein_animal_m2	247	35.1351	456	64.8649	42.4811	15.019	6.48	31.82	43.07	51.2	109.46
mother_ffq_nutrients_fatty_acids_total_monounsaturated_m2	247	35.1351	456	64.8649	32.4348	9.97226	9.01	24.75	32.14	39.66	60.83
mother_ffq_nutrients_EPA_m2	247	35.1351	456	64.8649	0.0683401	0.0585259	0	0.03	0.05	0.09	0.35
mother_ffq_nutrients_dietary_folate_equivalents_m2	247	35.1351	456	64.8649	282.847	93.3809	94.41	219.34	273.79	331.215	726.93
mother_ffq_nutrients_folic_acid_m2	247	35.1351	456	64.8649	257.304	73.7549	79.07	210.435	258.11	304.875	465.41
mother_ffq_nutrients_iron_haem_m2	247	35.1351	456	64.8649	0.989312	0.517843	0.01	0.615	0.97	1.305	2.57
mother_ffq_nutrients_iron_non_haem_m2	247	35.1351	456	64.8649	10.5314	2.8889	3.29	8.38	10.41	12.43	17.14
mother_ffq_nutrients_potassium_m2	247	35.1351	456	64.8649	3199.41	799.96	651.94	2674.55	3200.64	3727.02	5235.97
mother_ffq_nutrients_linoleic_acid_m2	247	35.1351	456	64.8649	14.5097	5.53524	2.88	10.69	13.68	17.815	35.26
mother_ffq_nutrients_lycopene_m2	247	35.1351	456	64.8649	2409.85	1872.88	0.3	1083.2	1883.94	3274.95	11064.1
mother_ffq_nutrients_magnesium_m2	247	35.1351	456	64.8649	364.706	98.7474	119.23	293.05	354.73	423.715	657.59
mother_ffq_nutrients_fatty_acids_total_polyunsaturated_m2	247	35.1351	456	64.8649	17.6604	6.51108	3.68	13.035	16.41	21.5	41.2
mother_ffq_nutrients_protein_vegetable_m2	247	35.1351	456	64.8649	36.1679	11.5368	10.98	28.455	35.44	43.66	81.74
mother_ffq_nutrients_polysaccharides_total_m2	247	35.1351	456	64.8649	131.863	40.0338	19.98	106.02	129.06	155.705	283.33
mother_ffq_nutrients_retinol_m2	247	35.1351	456	64.8649	537.237	262.525	104.89	353.4	497.42	655.545	2024.33
mother_ffq_nutrients_retinol_activity_equivalents_m2	247	35.1351	456	64.8649	913.22	334.228	249	682.25	882.06	1124.16	2091.33
mother_ffq_nutrients_protein_total_m2	247	35.1351	456	64.8649	78.6549	19.8326	22.99	65.77	79.89	90.005	159.81
mother_ffq_nutrients_iron_total_m2	247	35.1351	456	64.8649	11.5192	2.97218	3.4	9.455	11.46	13.58	19.46
mother_ffq_nutrients_carbohydrates_total_m2	247	35.1351	456	64.8649	246.604	71.9677	59.95	196.215	247.82	294.61	435.49
mother_ffq_nutrients_mono_and_disaccharides_total_m2	247	35.1351	456	64.8649	114.662	42.8309	15.93	85.87	109.06	137.47	271.28
mother_ffq_nutrients_fat_total_m2	247	35.1351	456	64.8649	92.5526	28.0135	26.88	70.345	92.06	110.635	175.28
mother_ffq_nutrients_fatty_acids_total_trans_m2	247	35.1351	456	64.8649	1.6266	0.671021	0.55	1.135	1.52	2.05	4.06
mother_ffq_nutrients_fatty_acids_total_saturated_m2	247	35.1351	456	64.8649	34.8528	12.1339	10.1	26.12	34.04	41.71	83.15
mother_ffq_nutrients_vitamin_B1_m2	247	35.1351	456	64.8649	0.996356	0.29189	0.24	0.82	0.96	1.145	1.93
mother_ffq_nutrients_vitamin_B12_m2	247	35.1351	456	64.8649	4.15304	1.69263	0.69	3.09	3.98	5.025	11.9
mother_ffq_nutrients_vitamin_B2_m2	247	35.1351	456	64.8649	1.57348	0.519636	0.42	1.21	1.55	1.86	3.75
mother_ffq_nutrients_vitamin_B6_m2	247	35.1351	456	64.8649	1.71611	0.549311	0.34	1.36	1.67	1.99	3.82
mother_ffq_nutrients_vitamin_C_m2	247	35.1351	456	64.8649	97.3519	40.4126	2.83	68.085	98.31	118.355	234.31
mother_ffq_nutrients_vitamin_D_m2	247	35.1351	456	64.8649	3.13721	1.30795	0.42	2.19	2.94	3.91	7.18
mother_ffq_nutrients_vitamin_E_m2	247	35.1351	456	64.8649	14.3158	4.85993	3.61	10.875	13.78	17.265	34.28
mother_ffq_nutrients_dietary_fiber_total_m2	247	35.1351	456	64.8649	24.8944	7.45714	4.41	19.315	24.33	30.09	46.74
mother_ffq_nutrients_water_total_m2	247	35.1351	456	64.8649	2345.54	618.492	117.36	1951.77	2364.62	2802.28	3802.02
mother_ffq_nutrients_zinc_m2	247	35.1351	456	64.8649	10.8361	2.7847	3.69	9	10.85	12.515	22.99
mother_ffq_pattern_processed_foods	247	35.1351	456	64.8649	0.0197143	0.373998	-0.416658	-0.232265	-0.0564099	0.149183	2.00707
mother_ffq_pattern_vegetarian_foods	247	35.1351	456	64.8649	-0.00922706	0.402902	-0.73009	-0.284002	-0.0974897	0.232015	2.29856
mother_ffq_pattern_pescatarian_asian_foods	247	35.1351	456	64.8649	-0.0065987	0.468344	-0.848215	-0.372787	-0.0808775	0.277201	1.60825
mother_ffq_pattern_meat_and_fat	247	35.1351	456	64.8649	0.00888219	0.439299	-0.430672	-0.263284	-0.0663162	0.144702	4.31466
mother_ffq_pattern_dairy_pancakes_crackers_sauce	247	35.1351	456	64.8649	0.0218179	0.437053	-0.576089	-0.282961	-0.0304879	0.206939	4.08827
mother_ffq_pattern_snacks_and_alcoholic_drinks	247	35.1351	456	64.8649	-0.000528406	0.244557	-0.385643	-0.175047	-0.0644261	0.123083	1.07522
mother_ffq_pattern_dutch_foods	247	35.1351	456	64.8649	-0.00421147	0.34193	-0.624722	-0.248954	-0.0337838	0.175168	1.66583
mother_ffq_pattern_breakfast_foods	247	35.1351	456	64.8649	0.00445031	0.34584	-0.460307	-0.242471	-0.079974	0.137423	1.77395
mother_ffq_pattern_eggs_other_meats_white_wine	247	35.1351	456	64.8649	-0.00991481	0.320856	-0.476091	-0.235478	-0.0604833	0.117271	1.54245
mother_ffq_pattern_dutch_breakfast	247	35.1351	456	64.8649	-0.0189948	0.426812	-0.431002	-0.299407	-0.124449	0.103931	3.14973
infant_growth_birth_weight_kg	615	87.4822	88	12.5178	3.53317	0.511224	1.59	3.24	3.52	3.875	5.24
infant_growth_birth_length_cm	533	75.8179	170	24.1821	50.3361	2.21449	40.49	49	50.47	51.9	57
infant_growth_birth_head_circumf_cm	397	56.4723	306	43.5277	34.8213	1.53862	23	34	34.93	35.7	41.5
infant_growth_standardized_weight_slope_kg	615	87.4822	88	12.5178	-0.247264	23.8705	-57.506	-14.0588	-0.318711	11.4715	125.176
infant_growth_standardized_length_slope_cm	533	75.8179	170	24.1821	0.605289	50.7493	-248.985	-31.6471	-0.0934343	31.0226	176.07
infant_growth_standardized_head_circumf_slope_cm	397	56.4723	306	43.5277	-0.518102	21.0925	-59.1851	-13.2747	-1.97283	11.0846	89.1506

## Sheet: Table S8
Table S8. Summary statistics of cross-sectional, categorical metadata linked with mother gut microbiome
Phenotype	Number of Factor Levels, N	Total Sample Size, N	Percentage Total N, %	Total Missings, N	Percentage Total Missings, %	level_1_value	level_1_n	level_1_perc	level_2_value	level_2_n	level_2_perc	level_3_value	level_3_n	level_3_perc	level_4_value	level_4_n	level_4_perc	level_5_value	level_5_n	level_5_perc	level_6_value	level_6_n	level_6_perc	level_7_value	level_7_n	level_7_perc	level_8_value	level_8_n	level_8_perc	level_9_value	level_9_n	level_9_perc
infant_relations	2	703	100	0	0	singleton	691	98.293	twins	12	1.70697	NA	NA	NA	NA	NA	NA	NA	NA	NA	NA	NA	NA	NA	NA	NA	NA	NA	NA	NA	NA	NA
sibling_number	3	703	100	0	0	no	667	94.9	sibling_1	18	2.6	sibling_2	18	2.6	NA	NA	NA	NA	NA	NA	NA	NA	NA	NA	NA	NA	NA	NA	NA	NA	NA	NA
twin_pair	2	703	100	0	0	no	679	95.6	pair_1	12	1,7	pair_2	12	1,7	NA	NA	NA	NA	NA	NA	NA	NA	NA	NA	NA	NA	NA	NA	NA	NA	NA	NA
mother_education_p18	3	469	66.7141	234	33.2859	elementary_to_lower_secondary_education	8	1.70576	upper_secondary_education	107	22.8145	tertiary_education	354	75.4797	NA	NA	NA	NA	NA	NA	NA	NA	NA	NA	NA	NA	NA	NA	NA	NA	NA	NA
mother_income_net_p18	3	438	62.3044	265	37.6956	low_income	43	9.81735	middle_income	86	19.6347	high_income	309	70.5479	NA	NA	NA	NA	NA	NA	NA	NA	NA	NA	NA	NA	NA	NA	NA	NA	NA	NA
mother_health_menst_pattern_regular_prior_pregnancy_p18	4	469	66.7141	234	33.2859	1_regular	324	69.0832	2_never_been_regular	74	15.7783	3_irregular_for_few_months	50	10.661	4_irregular_for_few_years	21	4.47761	NA	NA	NA	NA	NA	NA	NA	NA	NA	NA	NA	NA	NA	NA	NA
mother_health_contra_use_injection_p18	2	329	46.7994	374	53.2006	no	325	98.7842	yes	4	1.21581	NA	NA	NA	NA	NA	NA	NA	NA	NA	NA	NA	NA	NA	NA	NA	NA	NA	NA	NA	NA	NA
mother_health_contra_use_pill_p18	2	329	46.7994	374	53.2006	no	112	34.0426	yes	217	65.9574	NA	NA	NA	NA	NA	NA	NA	NA	NA	NA	NA	NA	NA	NA	NA	NA	NA	NA	NA	NA	NA
mother_health_contra_use_nuvaring_p18	2	329	46.7994	374	53.2006	no	315	95.7447	yes	14	4.25532	NA	NA	NA	NA	NA	NA	NA	NA	NA	NA	NA	NA	NA	NA	NA	NA	NA	NA	NA	NA	NA
mother_health_contra_use_hormonaliud_p18	2	329	46.7994	374	53.2006	no	274	83.2827	yes	55	16.7173	NA	NA	NA	NA	NA	NA	NA	NA	NA	NA	NA	NA	NA	NA	NA	NA	NA	NA	NA	NA	NA
mother_health_contra_use_implant_p18	2	329	46.7994	374	53.2006	no	325	98.7842	yes	4	1.21581	NA	NA	NA	NA	NA	NA	NA	NA	NA	NA	NA	NA	NA	NA	NA	NA	NA	NA	NA	NA	NA
mother_health_coital_freq_with_father_of_child_first_trimester_p18	2	348	49.5021	355	50.4979	1_monthly	195	56.0345	2_weekly	153	43.9655	NA	NA	NA	NA	NA	NA	NA	NA	NA	NA	NA	NA	NA	NA	NA	NA	NA	NA	NA	NA	NA
mother_health_prior_pregnancy_endometriosis_p18	2	469	66.7141	234	33.2859	no	458	97.6546	yes	11	2.34542	NA	NA	NA	NA	NA	NA	NA	NA	NA	NA	NA	NA	NA	NA	NA	NA	NA	NA	NA	NA	NA
mother_health_prior_pregnancy_pcos_p18	2	469	66.7141	234	33.2859	no	438	93.3902	yes	31	6.60981	NA	NA	NA	NA	NA	NA	NA	NA	NA	NA	NA	NA	NA	NA	NA	NA	NA	NA	NA	NA	NA
mother_health_prior_pregnancy_ovarian_cysts_p18	2	469	66.7141	234	33.2859	no	443	94.4563	yes	26	5.54371	NA	NA	NA	NA	NA	NA	NA	NA	NA	NA	NA	NA	NA	NA	NA	NA	NA	NA	NA	NA	NA
mother_health_prior_pregnancy_std_p18	2	469	66.7141	234	33.2859	no	430	91.6844	yes	39	8.31557	NA	NA	NA	NA	NA	NA	NA	NA	NA	NA	NA	NA	NA	NA	NA	NA	NA	NA	NA	NA	NA
mother_health_prior_pregnancy_std_chlam_p18	2	463	65.8606	240	34.1394	no	445	96.1123	yes	18	3.88769	NA	NA	NA	NA	NA	NA	NA	NA	NA	NA	NA	NA	NA	NA	NA	NA	NA	NA	NA	NA	NA
mother_health_prior_pregnancy_std_herpes_p18	2	463	65.8606	240	34.1394	no	446	96.3283	yes	17	3.67171	NA	NA	NA	NA	NA	NA	NA	NA	NA	NA	NA	NA	NA	NA	NA	NA	NA	NA	NA	NA	NA
mother_health_eating_disorder_p18	2	469	66.7141	234	33.2859	no	452	96.3753	yes	17	3.62473	NA	NA	NA	NA	NA	NA	NA	NA	NA	NA	NA	NA	NA	NA	NA	NA	NA	NA	NA	NA	NA
mother_birthcardhealth_previous_preg_p18	2	641	91.1807	62	8.81935	no	241	37.5975	yes	400	62.4025	NA	NA	NA	NA	NA	NA	NA	NA	NA	NA	NA	NA	NA	NA	NA	NA	NA	NA	NA	NA	NA
mother_health_alcohol_first_trimester_p18	3	469	66.7141	234	33.2859	1_yes	50	10.661	2_no	409	87.2068	3_do_not_know	10	2.1322	NA	NA	NA	NA	NA	NA	NA	NA	NA	NA	NA	NA	NA	NA	NA	NA	NA	NA
mother_health_smoked_one_whole_year_p18	2	469	66.7141	234	33.2859	no	166	35.3945	yes	303	64.6055	NA	NA	NA	NA	NA	NA	NA	NA	NA	NA	NA	NA	NA	NA	NA	NA	NA	NA	NA	NA	NA
mother_health_exposure_secondhand_smoke_while_pregnant_first_trimester_p18	2	400	56.899	303	43.101	no	309	77.25	yes	91	22.75	NA	NA	NA	NA	NA	NA	NA	NA	NA	NA	NA	NA	NA	NA	NA	NA	NA	NA	NA	NA	NA
mother_health_drug_use_one_year_before_pregnancy_p18	2	466	66.2873	237	33.7127	no	439	94.206	yes	27	5.79399	NA	NA	NA	NA	NA	NA	NA	NA	NA	NA	NA	NA	NA	NA	NA	NA	NA	NA	NA	NA	NA
mother_health_regular_dentist_visits_p18	2	467	66.4296	236	33.5704	no	50	10.7066	yes	417	89.2934	NA	NA	NA	NA	NA	NA	NA	NA	NA	NA	NA	NA	NA	NA	NA	NA	NA	NA	NA	NA	NA
mother_health_dental_health_p18	5	465	66.1451	238	33.8549	1_excellent	41	8.8172	2_very_good	118	25.3763	3_good	230	49.4624	4_average	70	15.0538	5_bad	6	1.29032	NA	NA	NA	NA	NA	NA	NA	NA	NA	NA	NA	NA
mother_health_bleeding_gums_p18	2	467	66.4296	236	33.5704	no	262	56.1028	yes	205	43.8972	NA	NA	NA	NA	NA	NA	NA	NA	NA	NA	NA	NA	NA	NA	NA	NA	NA	NA	NA	NA	NA
mother_food_avoid_gluten_preg	2	408	58.037	295	41.963	no	369	90.4412	yes	39	9.55882	NA	NA	NA	NA	NA	NA	NA	NA	NA	NA	NA	NA	NA	NA	NA	NA	NA	NA	NA	NA	NA
mother_food_avoid_dairy_preg	2	411	58.4637	292	41.5363	no	353	85.8881	yes	58	14.1119	NA	NA	NA	NA	NA	NA	NA	NA	NA	NA	NA	NA	NA	NA	NA	NA	NA	NA	NA	NA	NA
mother_delivery_within_month_hosp	2	487	69.2745	216	30.7255	no	453	93.0185	yes	34	6.98152	NA	NA	NA	NA	NA	NA	NA	NA	NA	NA	NA	NA	NA	NA	NA	NA	NA	NA	NA	NA	NA
infant_delivery_within_month_hosp	2	467	66.4296	236	33.5704	no	461	98.7152	yes	6	1.2848	NA	NA	NA	NA	NA	NA	NA	NA	NA	NA	NA	NA	NA	NA	NA	NA	NA	NA	NA	NA	NA
mother_delivery_within_month_hosp_bloodloss	2	486	69.1323	217	30.8677	no	479	98.5597	yes	7	1.44033	NA	NA	NA	NA	NA	NA	NA	NA	NA	NA	NA	NA	NA	NA	NA	NA	NA	NA	NA	NA	NA
birth_deliverybirthcard_mode_binary	2	667	94.8791	36	5.12091	CS	96	14.3928	VG	571	85.6072	NA	NA	NA	NA	NA	NA	NA	NA	NA	NA	NA	NA	NA	NA	NA	NA	NA	NA	NA	NA	NA
birth_delivery_mode_simple	3	662	94.1679	41	5.83215	VG	571	86.2538	post_labor_CS	54	8.1571	pre_labor_CS	37	5.58912	NA	NA	NA	NA	NA	NA	NA	NA	NA	NA	NA	NA	NA	NA	NA	NA	NA	NA
birth_delivery_mode_complex	8	502	71.4083	201	28.5917	induction_emergency_CS	21	4.18327	induction_vaccum_VG	12	2.39044	induction_VG	93	18.5259	planned_CS	31	6.1753	pre_labor_emergency_CS	6	1.19522	spon_contrac_emergency_CS	33	6.57371	spon_contrac_vaccum_VG	28	5.57769	spon_contrac_VG	278	55.3785	NA	NA	NA
mother_deliverybirthcard_del_induced_balloon	2	145	20.6259	558	79.3741	no	59	40.6897	yes	86	59.3103	NA	NA	NA	NA	NA	NA	NA	NA	NA	NA	NA	NA	NA	NA	NA	NA	NA	NA	NA	NA	NA
mother_deliverybirthcard_del_induced_IV_drip	2	123	17.4964	580	82.5036	no	44	35.7724	yes	79	64.2276	NA	NA	NA	NA	NA	NA	NA	NA	NA	NA	NA	NA	NA	NA	NA	NA	NA	NA	NA	NA	NA
mother_deliverybirthcard_del_induced_breaking_membrane	2	137	19.4879	566	80.5121	no	46	33.5766	yes	91	66.4234	NA	NA	NA	NA	NA	NA	NA	NA	NA	NA	NA	NA	NA	NA	NA	NA	NA	NA	NA	NA	NA
mother_deliverybirthcard_del_induced_labour_IV_contraction_inducers	2	481	68.4211	222	31.5789	no	311	64.657	yes	170	35.343	NA	NA	NA	NA	NA	NA	NA	NA	NA	NA	NA	NA	NA	NA	NA	NA	NA	NA	NA	NA	NA
mother_delivery_del_pain_IV_pump_remifentanyl	2	486	69.1323	217	30.8677	no	460	94.6502	yes	26	5.34979	NA	NA	NA	NA	NA	NA	NA	NA	NA	NA	NA	NA	NA	NA	NA	NA	NA	NA	NA	NA	NA
mother_geneticsbirthcard_blood_group	4	574	81.6501	129	18.3499	A	248	43.2056	AB	13	2.26481	B	55	9.58188	O	258	44.9477	NA	NA	NA	NA	NA	NA	NA	NA	NA	NA	NA	NA	NA	NA	NA
mother_genetics_blood_group_genotype	6	384	54.623	319	45.377	A/A	22	5.72917	A/B	10	2.60417	A/O	145	37.7604	B/B	2	0.520833	B/O	35	9.11458	O/O	170	44.2708	NA	NA	NA	NA	NA	NA	NA	NA	NA
mother_birthcard_rhesus_d_factor	2	421	59.8862	282	40.1138	negative	77	18.2898	positive	344	81.7102	NA	NA	NA	NA	NA	NA	NA	NA	NA	NA	NA	NA	NA	NA	NA	NA	NA	NA	NA	NA	NA
mother_birthcardhealth_smoking_during_pregnancy	3	544	77.3826	159	22.6174	no	518	95.2206	yes	14	2.57353	stopped	12	2.20588	NA	NA	NA	NA	NA	NA	NA	NA	NA	NA	NA	NA	NA	NA	NA	NA	NA	NA
mother_birthcard_type_twin	2	10	1.42248	693	98.5775	BCBA	7	70	MCBA	3	30	NA	NA	NA	NA	NA	NA	NA	NA	NA	NA	NA	NA	NA	NA	NA	NA	NA	NA	NA	NA	NA
mother_birthcard_med_preg_antemetics_antinausea_R06A	2	157	22.3329	546	77.6671	no	150	95.5414	yes	7	4.4586	NA	NA	NA	NA	NA	NA	NA	NA	NA	NA	NA	NA	NA	NA	NA	NA	NA	NA	NA	NA	NA
mother_birthcard_infectious_disease_preg_HSV	2	316	44.9502	387	55.0498	no	308	97.4684	yes	8	2.53165	NA	NA	NA	NA	NA	NA	NA	NA	NA	NA	NA	NA	NA	NA	NA	NA	NA	NA	NA	NA	NA
mother_birthcard_infectious_disease_preg_GBS	2	316	44.9502	387	55.0498	no	304	96.2025	yes	12	3.79747	NA	NA	NA	NA	NA	NA	NA	NA	NA	NA	NA	NA	NA	NA	NA	NA	NA	NA	NA	NA	NA
mother_birthcardself_gestational_age_catg	4	703	100	0	0	very_preterm_=<32_wks	3	0.426743	moderate_preterm_32_<36,9wks	36	5.12091	term_36,9_41,9wks	654	93.0299	post_term_=>41,9wks	10	1.42248	NA	NA	NA	NA	NA	NA	NA	NA	NA	NA	NA	NA	NA	NA	NA
mother_birthcard_parity	6	510	72.5462	193	27.4538	0_none	230	45.098	1_one	183	35.8824	2_two	70	13.7255	3_three	21	4.11765	4_four	5	0.980392	7_seven	1	0.196078	NA	NA	NA	NA	NA	NA	NA	NA	NA
mother_birthcardhealth_gravidity	9	593	84.3528	110	15.6472	1_one	193	32.5464	2_two	204	34.4013	3_three	106	17.8752	4_four	54	9.10624	5_five	20	3.37268	6_six	9	1.51771	7_seven	3	0.505902	8_eight	3	0.505902	9_nine	1	0.168634
mother_birthcard_water_spontaneously_broken	2	366	52.0626	337	47.9374	no	161	43.9891	yes	205	56.0109	NA	NA	NA	NA	NA	NA	NA	NA	NA	NA	NA	NA	NA	NA	NA	NA	NA	NA	NA	NA	NA
mother_birthcard_del_vacuum_pump	2	512	72.8307	191	27.1693	no	463	90.4297	yes	49	9.57031	NA	NA	NA	NA	NA	NA	NA	NA	NA	NA	NA	NA	NA	NA	NA	NA	NA	NA	NA	NA	NA
mother_birthcard_del_rupture	2	476	67.7098	227	32.2902	no	203	42.6471	yes	273	57.3529	NA	NA	NA	NA	NA	NA	NA	NA	NA	NA	NA	NA	NA	NA	NA	NA	NA	NA	NA	NA	NA
mother_birthcard_del_complications_long_labor_O63	2	412	58.606	291	41.394	no	382	92.7184	yes	30	7.28155	NA	NA	NA	NA	NA	NA	NA	NA	NA	NA	NA	NA	NA	NA	NA	NA	NA	NA	NA	NA	NA
birth_deliverybirthcard_place_delivery_simple	2	665	94.5946	38	5.40541	home	153	23.0075	hospital	512	76.9925	NA	NA	NA	NA	NA	NA	NA	NA	NA	NA	NA	NA	NA	NA	NA	NA	NA	NA	NA	NA	NA
birth_birthcard_place_delivery_complex	3	546	77.6671	157	22.3329	home	118	21.6117	hospital	369	67.5824	hospitalPK	59	10.8059	NA	NA	NA	NA	NA	NA	NA	NA	NA	NA	NA	NA	NA	NA	NA	NA	NA	NA
birth_birthcard_place_delivery_hospital	4	375	53.3428	328	46.6572	assen	57	15.2	groningen_academic	83	22.1333	groningen_peripheral	96	25.6	other	139	37.0667	NA	NA	NA	NA	NA	NA	NA	NA	NA	NA	NA	NA	NA	NA	NA
infant_birthcard_light_therapy	2	295	41.963	408	58.037	no	286	96.9492	yes	9	3.05085	NA	NA	NA	NA	NA	NA	NA	NA	NA	NA	NA	NA	NA	NA	NA	NA	NA	NA	NA	NA	NA
infant_birthcard_med_antibiotics_T195_J01CA_B	2	308	43.8122	395	56.1878	no	303	98.3766	yes	5	1.62338	NA	NA	NA	NA	NA	NA	NA	NA	NA	NA	NA	NA	NA	NA	NA	NA	NA	NA	NA	NA	NA
infant_birthcard_comp_large_gestational_age_P08,1	2	415	59.0327	288	40.9673	no	402	96.8675	yes	13	3.13253	NA	NA	NA	NA	NA	NA	NA	NA	NA	NA	NA	NA	NA	NA	NA	NA	NA	NA	NA	NA	NA
infant_birthcard_comp_pre_term_O60	2	415	59.0327	288	40.9673	no	406	97.8313	yes	9	2.16867	NA	NA	NA	NA	NA	NA	NA	NA	NA	NA	NA	NA	NA	NA	NA	NA	NA	NA	NA	NA	NA
mother_deliveryhealth_preg_complaint_flu_rti	2	591	84.0683	112	15.9317	no	439	74.2809	yes	152	25.7191	NA	NA	NA	NA	NA	NA	NA	NA	NA	NA	NA	NA	NA	NA	NA	NA	NA	NA	NA	NA	NA
mother_deliveryhealth_preg_complaint_gastroenteritis	2	591	84.0683	112	15.9317	no	446	75.4653	yes	145	24.5347	NA	NA	NA	NA	NA	NA	NA	NA	NA	NA	NA	NA	NA	NA	NA	NA	NA	NA	NA	NA	NA
mother_deliveryhealth_preg_complaint_uti	2	592	84.2105	111	15.7895	no	431	72.8041	yes	161	27.1959	NA	NA	NA	NA	NA	NA	NA	NA	NA	NA	NA	NA	NA	NA	NA	NA	NA	NA	NA	NA	NA
mother_deliveryhealth_preg_complaint_vaginal_fungal_inf	2	592	84.2105	111	15.7895	no	406	68.5811	yes	186	31.4189	NA	NA	NA	NA	NA	NA	NA	NA	NA	NA	NA	NA	NA	NA	NA	NA	NA	NA	NA	NA	NA
mother_deliverybirthcard_preg_comp_preeclampsia	2	651	92.6031	52	7.39687	no	636	97.6959	yes	15	2.30415	NA	NA	NA	NA	NA	NA	NA	NA	NA	NA	NA	NA	NA	NA	NA	NA	NA	NA	NA	NA	NA
mother_deliverybirthcard_preg_comp_hypertension	2	651	92.6031	52	7.39687	no	598	91.8587	yes	53	8.14132	NA	NA	NA	NA	NA	NA	NA	NA	NA	NA	NA	NA	NA	NA	NA	NA	NA	NA	NA	NA	NA
mother_deliverybirthcard_preg_comp_GDM	2	651	92.6031	52	7.39687	no	612	94.0092	yes	39	5.99078	NA	NA	NA	NA	NA	NA	NA	NA	NA	NA	NA	NA	NA	NA	NA	NA	NA	NA	NA	NA	NA
mother_deliverybirthcardhealth_preg_complaint_hyperemesis_gravidarum	2	681	96.8706	22	3.12945	no	536	78.7078	yes	145	21.2922	NA	NA	NA	NA	NA	NA	NA	NA	NA	NA	NA	NA	NA	NA	NA	NA	NA	NA	NA	NA	NA
mother_deliverybirthcard_preg_comp_cholestasis	2	654	93.0299	49	6.97013	no	639	97.7064	yes	15	2.29358	NA	NA	NA	NA	NA	NA	NA	NA	NA	NA	NA	NA	NA	NA	NA	NA	NA	NA	NA	NA	NA
infant_misc_sex	2	703	100	0	0	female	342	48.6486	male	361	51.3514	NA	NA	NA	NA	NA	NA	NA	NA	NA	NA	NA	NA	NA	NA	NA	NA	NA	NA	NA	NA	NA
family_pets_any	2	595	84.6373	108	15.3627	no	240	40.3361	yes	355	59.6639	NA	NA	NA	NA	NA	NA	NA	NA	NA	NA	NA	NA	NA	NA	NA	NA	NA	NA	NA	NA	NA
family_pets_cat	2	598	85.064	105	14.936	no	358	59.8662	yes	240	40.1338	NA	NA	NA	NA	NA	NA	NA	NA	NA	NA	NA	NA	NA	NA	NA	NA	NA	NA	NA	NA	NA
family_pets_dog	2	598	85.064	105	14.936	no	489	81.7726	yes	109	18.2274	NA	NA	NA	NA	NA	NA	NA	NA	NA	NA	NA	NA	NA	NA	NA	NA	NA	NA	NA	NA	NA
family_living_situation	4	532	75.6757	171	24.3243	other	49	9.21053	farm	23	4.32331	flat	18	3.38346	house	442	83.0827	NA	NA	NA	NA	NA	NA	NA	NA	NA	NA	NA	NA	NA	NA	NA
infant_health_food_allergy	2	522	74.2532	181	25.7468	no	472	90.4215	yes	50	9.57854	NA	NA	NA	NA	NA	NA	NA	NA	NA	NA	NA	NA	NA	NA	NA	NA	NA	NA	NA	NA	NA
infant_health_eczema_diagnosis_relaxed	2	495	70.4125	208	29.5875	no	379	76.5657	yes	116	23.4343	NA	NA	NA	NA	NA	NA	NA	NA	NA	NA	NA	NA	NA	NA	NA	NA	NA	NA	NA	NA	NA
infant_health_eczema_diagnosis_strict	2	172	24.4666	531	75.5334	no	56	32.5581	yes	116	67.4419	NA	NA	NA	NA	NA	NA	NA	NA	NA	NA	NA	NA	NA	NA	NA	NA	NA	NA	NA	NA	NA
infant_health_breathing_difficulties	2	459	65.2916	244	34.7084	no	332	72.3312	yes	127	27.6688	NA	NA	NA	NA	NA	NA	NA	NA	NA	NA	NA	NA	NA	NA	NA	NA	NA	NA	NA	NA	NA
infant_scorad_family_history_allergic_disease	2	321	45.6615	382	54.3385	no	80	24.9221	yes	241	75.0779	NA	NA	NA	NA	NA	NA	NA	NA	NA	NA	NA	NA	NA	NA	NA	NA	NA	NA	NA	NA	NA

## Sheet: Table S9.
Table S9. Summary statistics of longitudinal, numeric metadata linked with mother gut microbiome
Phenotype	Time Point	Total Sample Size, N	Percentage Total N, %	Total Missings, N	Percentage Total Missings, %	Mean	Standard Deviation	Min	Q1	Median	Q3	Max
mother_rome3_stool_freq_less_3_times_week_last_3_months	P28	162	23.0441	541	76.9559	0.358025	0.79296	0	0	0	0	4
mother_rome3_stool_freq_less_3_times_week_last_3_months	M3	204	28.5315	511	71.4685	0.313725	0.658112	0	0	0	0	4
mother_rome3_stool_freq_hard_last_3_months	P28	162	23.0441	541	76.9559	1.2037	0.906422	0	1	1	2	4
mother_rome3_stool_freq_hard_last_3_months	M3	204	28.5315	511	71.4685	1.10294	0.93334	0	1	1	1	4
mother_rome3_stool_freq_watery_last_3_months	P28	162	23.0441	541	76.9559	0.567901	0.676826	0	0	0	1	3
mother_rome3_stool_freq_watery_last_3_months	M3	204	28.5315	511	71.4685	0.632353	0.86368	0	0	0	1	3
mother_stooldiary_abdominal_pain_avg	P28	156	22.1906	547	77.8094	1.26465	0.431115	1	1	1.14286	1.28571	3.28571
mother_stooldiary_abdominal_pain_avg	M3	121	16.9231	594	83.0769	1.22314	0.339514	1	1	1	1.28571	3.14286
mother_stooldiary_bloated_avg	P28	154	21.9061	549	78.0939	1.42857	0.556528	1	1	1.14286	1.71429	4.57143
mother_stooldiary_bloated_avg	M3	121	16.9231	594	83.0769	1.30933	0.501137	1	1	1.14286	1.42857	3.85714
mother_stooldiary_burping_avg	P28	155	22.0484	548	77.9516	1.34194	0.501917	1	1	1	1.57143	3.42857
mother_stooldiary_burping_avg	M3	120	16.7832	595	83.2168	1.09643	0.254045	1	1	1	1	2.71429
mother_stooldiary_constipation_avg	P28	153	21.7639	550	78.2361	1.30065	0.44067	1	1	1.14286	1.42857	3.14286
mother_stooldiary_constipation_avg	M3	121	16.9231	594	83.0769	1.17946	0.302219	1	1	1	1.28571	2.28571
mother_stooldiary_diarrhea_avg	P28	149	21.1949	554	78.8051	1.05657	0.142682	1	1	1	1	1.71429
mother_stooldiary_diarrhea_avg	M3	120	16.7832	595	83.2168	1.12381	0.337926	1	1	1	1.14286	3.57143
mother_stooldiary_flatulence_avg	P28	156	22.1906	547	77.8094	1.60806	0.524043	1	1.14286	1.57143	2	3.85714
mother_stooldiary_flatulence_avg	M3	119	16.6434	596	83.3566	1.60744	0.526443	1	1.14286	1.57143	2	3
mother_stooldiary_stool_freq_avg	P28	158	22.4751	545	77.5249	1.20705	0.488938	0.285714	0.857143	1.14286	1.42857	3.28571
mother_stooldiary_stool_freq_avg	M3	126	17.6224	589	82.3776	1.18594	0.466431	0.142857	0.857143	1.14286	1.42857	2.85714
mother_stooldiary_nausea_avg	P28	155	22.0484	548	77.9516	1.20553	0.409302	1	1	1	1.14286	2.85714
mother_stooldiary_nausea_avg	M3	119	16.6434	596	83.3566	1.09604	0.245407	1	1	1	1	2.42857
mother_stooldiary_not_well_avg	P28	155	22.0484	548	77.9516	1.48664	0.488049	1	1.14286	1.42857	1.71429	3
mother_stooldiary_not_well_avg	M3	121	16.9231	594	83.0769	1.37072	0.431174	1	1	1.14286	1.57143	3
mother_ldi_stress_past_year_preg_avg	P12	476	67.7098	227	32.2902	0.156162	0.167909	0	0	0.0833333	0.25	1.08333
mother_ldi_stress_past_year_preg_avg	P28	476	67.7098	227	32.2902	0.156162	0.167909	0	0	0.0833333	0.25	1.08333
mother_ldi_stress_past_year_preg_avg	B	485	67.8322	230	32.1678	0.155842	0.167731	0	0	0.0833333	0.25	1.08333
mother_ldi_stress_past_year_preg_avg	W2	485	67.8322	230	32.1678	0.155842	0.167731	0	0	0.0833333	0.25	1.08333
mother_ldi_stress_past_year_preg_avg	M1	485	67.8322	230	32.1678	0.155842	0.167731	0	0	0.0833333	0.25	1.08333
mother_ldi_stress_past_year_preg_avg	M2	485	67.8322	230	32.1678	0.155842	0.167731	0	0	0.0833333	0.25	1.08333
mother_ldi_stress_past_year_postpartum_avg	M3	300	41.958	415	58.042	0.227222	0.223336	0	0.0833333	0.166667	0.333333	1.16667
mother_ldi_stress_past_year_postpartum_avg	M6	300	41.958	415	58.042	0.227222	0.223336	0	0.0833333	0.166667	0.333333	1.16667
mother_ldi_stress_past_year_postpartum_avg	M9	300	41.958	415	58.042	0.227222	0.223336	0	0.0833333	0.166667	0.333333	1.16667
mother_ldi_stress_past_year_postpartum_avg	M12	300	41.958	415	58.042	0.227222	0.223336	0	0.0833333	0.166667	0.333333	1.16667
infant_growth_weight_kg	B	627	87.6923	88	12.3077	3.51545	0.526572	1.59	3.22	3.51	3.87	5.24
infant_growth_weight_kg	W2	627	87.6923	88	12.3077	3.90214	0.520108	2.12	3.59	3.91	4.245	5.7
infant_growth_weight_kg	M1	627	87.6923	88	12.3077	4.41498	0.532382	2.6	4.09	4.42	4.755	6.18
infant_growth_weight_kg	M2	627	87.6923	88	12.3077	5.29439	0.55314	3.42	4.96	5.3	5.65	7.1
infant_growth_weight_kg	M3	627	87.6923	88	12.3077	6.03249	0.592827	4.1	5.645	6.05	6.39	7.91
infant_growth_weight_kg	M6	627	87.6923	88	12.3077	7.73687	0.711396	5.55	7.24	7.74	8.195	10.5
infant_growth_weight_kg	M9	627	87.6923	88	12.3077	8.89582	0.884034	6.2	8.305	8.9	9.415	12.8
infant_growth_weight_kg	M12	627	87.6923	88	12.3077	9.86582	1.08298	6.67	9.185	9.87	10.43	15
infant_growth_length_cm	B	541	75.6643	174	24.3357	50.2948	2.23622	40.49	49	50.4	51.9	57
infant_growth_length_cm	W2	541	75.6643	174	24.3357	52.2745	2.09808	42.56	51.1	52.5	53.7	57.23
infant_growth_length_cm	M1	541	75.6643	174	24.3357	54.389	2.11826	44.75	53.09	54.6	55.81	59.24
infant_growth_length_cm	M2	541	75.6643	174	24.3357	58.0455	2.10343	48.54	56.74	58.26	59.4	64.5
infant_growth_length_cm	M3	541	75.6643	174	24.3357	61.0473	2.10207	51.69	59.78	61.2	62.38	66.02
infant_growth_length_cm	M6	541	75.6643	174	24.3357	67.7474	2.17817	58.84	66.38	67.95	69.14	73.08
infant_growth_length_cm	M9	541	75.6643	174	24.3357	72.1386	2.34314	63.68	70.64	72.22	73.71	78.13
infant_growth_length_cm	M12	541	75.6643	174	24.3357	76.1928	2.61889	66.66	74.53	76.21	77.84	82.84
infant_growth_head_circumf_cm	B	406	56.7832	309	43.2168	34.8175	1.53039	23	34	34.915	35.67	41.5
infant_growth_head_circumf_cm	W2	406	56.7832	309	43.2168	35.9401	1.34936	28.63	35.16	35.975	36.7775	41.79
infant_growth_head_circumf_cm	M1	406	56.7832	309	43.2168	37.0771	1.35199	29.91	36.28	37.11	37.955	42.82
infant_growth_head_circumf_cm	M2	406	56.7832	309	43.2168	38.9095	1.31263	32.09	38.14	38.95	39.7475	44.51
infant_growth_head_circumf_cm	M3	406	56.7832	309	43.2168	40.3396	1.29692	33.87	39.5775	40.36	41.11	45.81
infant_growth_head_circumf_cm	M6	406	56.7832	309	43.2168	43.2417	1.2582	37.76	42.47	43.29	44.025	48.26
infant_growth_head_circumf_cm	M9	406	56.7832	309	43.2168	44.8088	1.26043	40.3	44.005	44.82	45.585	49.37
infant_growth_head_circumf_cm	M12	406	56.7832	309	43.2168	46.3268	1.30748	42.81	45.46	46.305	47.0975	50.88
infant_growth_bmi_kg_m2	B	534	74.6853	181	25.3147	13.8785	1.48051	8.03324	13.0365	13.8876	14.7991	19.5739
infant_growth_bmi_kg_m2	W2	534	74.6853	181	25.3147	14.2077	1.29049	9.60585	13.4318	14.2029	15.0571	19.7443
infant_growth_bmi_kg_m2	M1	534	74.6853	181	25.3147	14.8711	1.20453	10.3706	14.145	14.8188	15.6202	19.8197
infant_growth_bmi_kg_m2	M2	534	74.6853	181	25.3147	15.6765	1.08995	11.493	14.9874	15.6548	16.3512	20.4658
infant_growth_bmi_kg_m2	M3	534	74.6853	181	25.3147	16.157	1.09318	12.3024	15.4809	16.1031	16.8049	19.8461
infant_growth_bmi_kg_m2	M6	534	74.6853	181	25.3147	16.8304	1.13313	13.3737	16.1424	16.8314	17.4789	21.1942
infant_growth_bmi_kg_m2	M9	534	74.6853	181	25.3147	17.0661	1.30953	12.8063	16.2732	17.0226	17.84	22.2954
infant_growth_bmi_kg_m2	M12	534	74.6853	181	25.3147	16.9633	1.4766	12.0498	16.0373	16.8788	17.8374	22.7779
infant_growth_WFL_SDS	B	333	46.5734	382	53.4266	0.273022	1.22383	-7.22778	-0.380454	0.43282	1.11044	3.46494
infant_growth_WFL_SDS	W2	461	64.4755	254	35.5245	0.313147	1.0218	-5.06303	-0.212714	0.440865	0.968163	3.36894
infant_growth_WFL_SDS	M1	519	72.5874	196	27.4126	0.487249	0.917895	-4.30408	-0.0489598	0.553112	1.0762	3.20456
infant_growth_WFL_SDS	M2	533	74.5455	182	25.4545	0.518352	0.81901	-3.50256	0.011713	0.558532	1.02138	3.22805
infant_growth_WFL_SDS	M3	534	74.6853	181	25.3147	0.448394	0.817437	-3.02689	-0.0696997	0.478594	0.975988	2.69435
infant_growth_WFL_SDS	M6	534	74.6853	181	25.3147	0.247268	0.829534	-2.68485	-0.265867	0.248199	0.780576	2.86828
infant_growth_WFL_SDS	M9	534	74.6853	181	25.3147	0.153913	0.939969	-3.17942	-0.420194	0.160109	0.7625	3.28386
infant_growth_WFL_SDS	M12	534	74.6853	181	25.3147	-0.0187528	1.07604	-4.24568	-0.667267	-0.0017288	0.695258	3.59852
infant_growth_WFA_SDS	W2	627	87.6923	88	12.3077	0.569103	1.26869	-4.40116	-0.0814831	0.620684	1.38393	4.14043
infant_growth_WFA_SDS	M1	627	87.6923	88	12.3077	0.702812	1.14293	-3.69076	0.0786339	0.738615	1.43235	3.82731
infant_growth_WFA_SDS	M2	627	87.6923	88	12.3077	0.716359	0.971298	-2.96194	0.153709	0.729451	1.33676	3.44727
infant_growth_WFA_SDS	M3	627	87.6923	88	12.3077	0.629588	0.898823	-2.62433	0.0702944	0.644267	1.21012	3.57125
infant_growth_WFA_SDS	M6	627	87.6923	88	12.3077	0.363106	0.828492	-2.43317	-0.18272	0.375618	0.871863	3.14992
infant_growth_WFA_SDS	M9	627	87.6923	88	12.3077	0.151842	0.893744	-2.91114	-0.404278	0.200209	0.659118	3.55221
infant_growth_WFA_SDS	M12	627	87.6923	88	12.3077	0.0460351	0.987829	-3.29005	-0.524156	0.0934041	0.584219	4.01414
infant_growth_LFA_SDS	W2	541	75.6643	174	24.3357	-0.151457	0.869506	-4.17847	-0.658574	-0.0994226	0.407861	2.1143
infant_growth_LFA_SDS	M1	541	75.6643	174	24.3357	0.0446739	0.870387	-3.89804	-0.455897	0.11099	0.630206	2.26872
infant_growth_LFA_SDS	M2	541	75.6643	174	24.3357	0.267517	0.840007	-3.50951	-0.21688	0.335379	0.836644	2.79142
infant_growth_LFA_SDS	M3	541	75.6643	174	24.3357	0.329752	0.820644	-3.27571	-0.140677	0.394874	0.889228	2.44644
infant_growth_LFA_SDS	M6	541	75.6643	174	24.3357	0.200185	0.800965	-2.96629	-0.240299	0.234297	0.752039	2.19544
infant_growth_LFA_SDS	M9	541	75.6643	174	24.3357	0.0312013	0.822378	-2.82079	-0.517101	0.0562706	0.586871	2.00956
infant_growth_LFA_SDS	M12	541	75.6643	174	24.3357	0.127276	0.884583	-2.98763	-0.422836	0.171481	0.690781	2.27851
infant_growth_HcFA_SDS	B	406	56.7832	309	43.2168	-0.430535	1.13306	-9.57123	-0.906246	-0.485936	0.162602	5.1354
infant_growth_HcFA_SDS	W2	406	56.7832	309	43.2168	-0.182	0.963368	-5.6167	-0.664319	-0.164681	0.326178	4.67721
infant_growth_HcFA_SDS	M1	406	56.7832	309	43.2168	-0.0519467	0.955425	-5.24605	-0.571067	-0.0698961	0.458597	4.78159
infant_growth_HcFA_SDS	M2	406	56.7832	309	43.2168	-0.0225704	0.907817	-4.84136	-0.490748	-0.0513409	0.501439	4.73076
infant_growth_HcFA_SDS	M3	406	56.7832	309	43.2168	-0.0389878	0.886935	-4.52044	-0.50525	-0.074388	0.473167	4.56854
infant_growth_HcFA_SDS	M6	406	56.7832	309	43.2168	-0.22921	0.855193	-3.86565	-0.695944	-0.229146	0.31106	4.0398
infant_growth_HcFA_SDS	M9	406	56.7832	309	43.2168	-0.387675	0.823099	-3.18389	-0.887575	-0.397368	0.17813	3.45966
infant_growth_HcFA_SDS	M12	406	56.7832	309	43.2168	-0.154118	0.818572	-2.89007	-0.670403	-0.186853	0.384582	3.23985
infant_growth_BMI_SDS	W2	534	74.6853	181	25.3147	0.997797	1.17979	-3.96281	0.349323	1.05818	1.74549	4.72392
infant_growth_BMI_SDS	M1	534	74.6853	181	25.3147	0.858636	1.05764	-3.50875	0.252043	0.870809	1.48498	4.1673
infant_growth_BMI_SDS	M2	534	74.6853	181	25.3147	0.607059	0.869637	-2.98627	0.122005	0.608543	1.1449	3.65959
infant_growth_BMI_SDS	M3	534	74.6853	181	25.3147	0.475203	0.821241	-2.65332	0.000341826	0.46858	0.944799	2.98636
infant_growth_BMI_SDS	M6	534	74.6853	181	25.3147	0.299028	0.837297	-2.48016	-0.191837	0.292023	0.790464	3.1082
infant_growth_BMI_SDS	M9	534	74.6853	181	25.3147	0.110483	0.965422	-3.46853	-0.439645	0.0858787	0.74906	3.4118
infant_growth_BMI_SDS	M12	534	74.6853	181	25.3147	-0.116645	1.11447	-4.55652	-0.806983	-0.0957729	0.62349	3.57846
infant_asq_com_score	M6	356	49.7902	359	50.2098	46.0955	9.32825	15	40	45	55	60
infant_asq_com_score	M12	335	46.8531	380	53.1469	35.7612	15.2699	0	25	40	50	60
infant_asq_gm_score	M6	356	49.7902	359	50.2098	34.5323	13.3663	0	25	35	45	60
infant_asq_gm_score	M12	334	46.7133	381	53.2867	35.994	19.1049	0	20	40	50	60
infant_asq_fm_score	M6	354	49.5105	361	50.4895	44.0989	11.8842	10	35	45	55	60
infant_asq_fm_score	M12	335	46.8531	380	53.1469	49.9104	9.59842	0	45	50	60	60
infant_asq_ps_score	M6	355	49.6503	360	50.3497	49.2282	10.4198	10	45	50	60	60
infant_asq_ps_score	M12	329	46.014	386	53.986	43.503	12.8269	0	35	45	55	60
infant_asq_psoc_score	M6	355	49.6503	360	50.3497	39.7211	13.4193	0	30	40	50	60
infant_asq_psoc_score	M12	334	46.7133	381	53.2867	42.3608	12.1983	0	35	45	50	60
infant_asq_total_score	M6	353	49.3706	362	50.6294	213.992	41.9758	70	190	220	245	295
infant_asq_total_score	M12	328	45.8741	387	54.1259	207.814	48.6642	55	178.75	212.5	245	300

[truncated: 6 more sheets: Table S10., Table S11., Table S12., Table 13., Table S14., Table S15.]
