# Supplementary material for: Pregnancy and Early Life Gut Microbiome: Influencing Factors and Health Implications
Source: Research Square preprint supplement (doi:10.21203/rs.3.rs-5334252/v1), 2024-10-31
Supplement: Supplementary file 2 [file 9efbb2326357c3ec4cc9a444.xlsx]

## Sheet: Index
Tables S16 - S61. Index
Table number	Table Title
Table S16.	Associations of time with the overall maternal gut microbiome
Table S17.	Associations of time with maternal gut microbiome species
Table S18.	Associations of time with the overall infant gut microbiome
Table S19.	Associations of time with infant gut microbiome species
Table S20.	Pairwise distances between same, related and unrelated mother:mother and infant:infant pairs
Table S21.	Phenotypes associated with infant gut microbiome trajectories
Table S22.	Phenotypes associated with factors of infant gut microbiome trajectories
Table S23.	Cross-sectional associations of infant-specific phenotypes with infant alpha diversity
Table S24.	Longitudinal associations of infant-specific phenotypes with infant alpha diversity
Table S25.	Infant gut microbiome variation explained by infant-specific detereminants at specific time points
Table S26.	Infant gut microbiome variation of the combined and complete stool samples collected at month 1, 3, 6 and 12 explained by infant-specific detereminants
Table S27.	Cross-sectional associations of infant-specific phenotype with infant gut microbiome bacterial species at SGB level
Table S28.	Longitudinal associations of infant-specific phenotypes with infant gut microbiome bacterial species at SGB level
Table S29.	Cross-sectional associations of infant-specific phenotypes with infant gut microbiome pathways
Table S30.	Longitudinal associations of infant-specific phenotypes with infant gut microbiome pathways
Table S31.	Cross-sectional associations of delivery-related phenotypes with the infant gut microbiome
Table S32.	Associations of maternal human milk oligosaccharides (HMOs) with the alpha diversity of the infant gut microbiome
Table S33.	Associations of maternal human milk oligosaccharides (HMOs) with the infant gut microbiome
Table S34.	Associations of maternal human milk oligosaccharides (HMOs) with infant gut microbiome pathways
Table S35.	Complementary foods assessed in Lifelines NEXT infants at ages 6 (18 food groups; 49 items), 9 (21 food groups; 66 items) and 12 (21 food groups; 66 items) months.
Table S36.	Associations of infant dietary features with the infant gut microbiome, adjusted for feeding mode and caloric intake
Table S37.	Associations of infant dietary patterns, derived by Factor Analysis, with the infant gut microbiome, adjusted for feeding mode and caloric intake
Table S38.	Associations of infant dietary patterns, derived by Latent Profile Analysis, with the infant gut microbiome, adjusted for feeding mode and caloric intake
Table S39.	Cross-sectional associations of maternal-specific phenotypes with maternal alpha diversity
Table S40.	Longitudinal associations of maternal-specific phenotypes with maternal alpha diversity
Table S41.	Maternal gut microbiome variation explained by maternal-specific phenotypes at specific time points
Table S42.	Maternal gut microbiome variation of the combined and complete stool samples collected at 12 weeks gestation, at delivery and 3 months postpartum explained by maternal-specific detereminants
Table S43.	Cross-sectional associations of maternal-specific phenotypes with maternal gut microbiome bacterial species at SGB level
Table S44.	Longitudinal associations of maternal-specific phenotypes with maternal gut microbiome bacterial species at SGB level
Table S45.	Cross-sectional associations of maternal-specific phenotypes with maternal gut microbiome pathways
Table S46.	Longitudinal associations of maternal-specific phenotypes with maternal gut microbiome pathways
Table S47.	Genetic distance species-specific threshold
Table S48.	Overall strain-sharing rates
Table S49.	Strain-sharing rates of individual species
Table S50.	Phenotypes associated with strain-sharing in individual species
Table S51.	Associations of mother-infant strain sharing and (clr-transformed) abundance of infant species in early and late time points
Table S52.	Associations between maternal gut microbiome species abundance (clr-transformed) and mother-infant gut microbiome strain sharing
Table S53.	Odds ratios of early life (W2-M3) transmitted bacterial species persisting in the infant gut microbiome over time (M6-M12) (Fisher test)
Table S54.	Phenotypes associated with mother-infant sharing rate
Table S55.	Phylogenetic Generalized Linear Mixed Model (PGLMM) associaitons with sampling time
Table S56.	Phylogenetic Generalized Linear Mixed Model (PGLMM) associations with several phenotypes
Table S57.	Food items and food groups (in Dutch and English) assessed in Lifelines NEXT mothers at 2 months postpartum
Table S58.	Spearman correlation of cross-sectional phenotypes linked with maternal gut microbiome
Table S59	Spearman correlation of longitudinal phenotypes linked with maternal gut microbiome
Table S60	Spearman correlation of cross-sectional phenotypes linked with infant gut microbiome
Table S61.	Spearman correlation of longitudinal phenotypes linked with infant gut microbiome

## Sheet: Table S16.
Table S16. Associations of time with the overall maternal gut microbiome (reference time point: 12 weeks of pregnancy (P12); P28: 28 weeks of pregnancy, B: Delivery, M3: 3 months postpartmum; green: FDR<0.05)
Principal Components	Phenotype	Estimate	Standard Error	Degrees of Freedom	T-value	Pr(>|t|)	P-value	FDR	Model
PC1	P28	-1.33993	0.516207	926.498	-2.59573	0.00958838	2.08e-07	4.15e-06	Mixed
PC1	B	-2.51441	0.711503	966.43	-3.53395	0.000428792	2.08e-07	4.15e-06	Mixed
PC1	M3	-2.83122	0.49674	928.346	-5.6996	1.61e-08	2.08e-07	4.15e-06	Mixed
PC14	P28	-0.162223	0.249873	988.363	-0.649221	0.516346	1.19e-06	1.19e-05	Mixed
PC14	B	-0.781233	0.339565	1072.97	-2.30069	0.0216003	1.19e-06	1.19e-05	Mixed
PC14	M3	0.749354	0.240437	986.531	3.11663	0.00188222	1.19e-06	1.19e-05	Mixed
PC4	P28	0.442571	0.332034	961.286	1.33291	0.182878	1.47e-05	7.37e-05	Mixed
PC4	B	1.59471	0.454437	1024.06	3.50919	0.000469018	1.47e-05	7.37e-05	Mixed
PC4	M3	1.44208	0.319466	961.252	4.51405	7.15e-06	1.47e-05	7.37e-05	Mixed
PC8	P28	0.163886	0.326662	1022.58	0.501699	0.615987	1.17e-05	7.37e-05	Mixed
PC8	B	0.224689	0.441338	1122.81	0.509109	0.610776	1.17e-05	7.37e-05	Mixed
PC8	M3	1.39752	0.314374	1019.89	4.44539	9.73e-06	1.17e-05	7.37e-05	Mixed
PC5	P28	-0.0781931	0.340334	1009.64	-0.229754	0.81833	0.00102749	0.00410996	Mixed
PC5	B	0.489265	0.461316	1100.81	1.06058	0.289111	0.00102749	0.00410996	Mixed
PC5	M3	-0.952668	0.327503	1007.36	-2.90889	0.00370687	0.00102749	0.00410996	Mixed
PC17	P28	-0.276097	0.215127	969.231	-1.28341	0.199654	0.00179137	0.00597122	Mixed
PC17	B	0.0497299	0.294094	1035.47	0.169095	0.865755	0.00179137	0.00597122	Mixed
PC17	M3	-0.714463	0.206985	968.875	-3.45176	0.000581001	0.00179137	0.00597122	Mixed
PC10	P28	0.228759	0.273561	997.149	0.836227	0.403228	0.00266254	0.00760727	Mixed
PC10	B	-0.939072	0.371931	1079.64	-2.52485	0.011717	0.00266254	0.00760727	Mixed
PC10	M3	0.404508	0.263228	995.427	1.53672	0.124679	0.00266254	0.00760727	Mixed
PC9	P28	0.127268	0.275582	977.192	0.461818	0.644315	0.00337742	0.00767383	Mixed
PC9	B	0.520417	0.375909	1050.29	1.38442	0.166524	0.00337742	0.00767383	Mixed
PC9	M3	0.898224	0.265157	976.241	3.38752	0.000733449	0.00337742	0.00767383	Mixed
PC18	P28	0.268513	0.225818	990.173	1.18907	0.234698	0.00345322	0.00767383	Mixed
PC18	B	0.0511546	0.307379	1069.37	0.166422	0.867857	0.00345322	0.00767383	Mixed
PC18	M3	-0.489651	0.217283	988.708	-2.25351	0.0244453	0.00345322	0.00767383	Mixed
PC2	P28	0.105944	0.59824	1007.89	0.177093	0.859471	0.00610999	0.01222	Mixed
PC2	B	-1.67899	0.807098	1114.01	-2.08028	0.0377284	0.00610999	0.01222	Mixed
PC2	M3	-1.57458	0.575759	1005.05	-2.73478	0.00635194	0.00610999	0.01222	Mixed
PC20	P28	0.138272	0.249986	1011.17	0.553119	0.580304	0.00793731	0.0144315	Mixed
PC20	B	0.519002	0.338449	1105.95	1.53348	0.125445	0.00793731	0.0144315	Mixed
PC20	M3	-0.436272	0.240569	1008.71	-1.8135	0.0700514	0.00793731	0.0144315	Mixed
PC6	P28	0.511555	0.325517	987.909	1.57151	0.116384	0.0145363	0.0226609	Mixed
PC6	B	-0.478033	0.442671	1070.3	-1.07988	0.280437	0.0145363	0.0226609	Mixed
PC6	M3	-0.485128	0.313221	986.226	-1.54884	0.121741	0.0145363	0.0226609	Mixed
PC15	P28	-0.149192	0.229447	976.985	-0.650223	0.515701	0.0147296	0.0226609	Mixed
PC15	B	0.0814509	0.31302	1049.67	0.26021	0.794753	0.0147296	0.0226609	Mixed
PC15	M3	0.515617	0.220768	976.068	2.33556	0.0197158	0.0147296	0.0226609	Mixed
PC11	P28	-0.591494	0.282208	1008.35	-2.09595	0.0363351	0.0566326	0.0809038	Mixed
PC11	B	0.426129	0.382461	1100.17	1.11418	0.265447	0.0566326	0.0809038	Mixed
PC11	M3	-0.101373	0.271569	1006.04	-0.373284	0.709015	0.0566326	0.0809038	Mixed
PC3	P28	-0.944955	0.505628	1083.74	-1.86887	0.0619099	0.0961341	0.120168	Mixed
PC3	B	-1.36401	0.673673	1217.04	-2.02474	0.0431126	0.0961341	0.120168	Mixed
PC3	M3	-0.9609	0.486764	1081.92	-1.97406	0.0486293	0.0961341	0.120168	Mixed
PC13	P28	0.109999	0.242397	992.241	0.453795	0.650075	0.0939964	0.120168	Mixed
PC13	B	0.829108	0.329932	1071.44	2.51296	0.0121181	0.0939964	0.120168	Mixed
PC13	M3	0.254777	0.233236	990.768	1.09236	0.274941	0.0939964	0.120168	Mixed
PC7	P28	-0.605912	0.340634	1028.65	-1.77878	0.0755717	0.270809	0.318599	Mixed
PC7	B	-0.257004	0.459184	1135.16	-0.559698	0.575796	0.270809	0.318599	Mixed
PC7	M3	-0.538737	0.327841	1025.8	-1.64329	0.10063	0.270809	0.318599	Mixed
PC19	P28	0.0894948	0.206183	977.495	0.434055	0.664344	0.415532	0.461702	Mixed
PC19	B	0.452724	0.281848	1043.57	1.60627	0.108517	0.415532	0.461702	Mixed
PC19	M3	0.214841	0.19838	977.121	1.08298	0.279084	0.415532	0.461702	Mixed
PC12	P28	-0.229682	0.233119	971.86	-0.985255	0.324744	0.676878	0.70334	Mixed
PC12	B	-0.0335779	0.318735	1037.52	-0.105347	0.91612	0.676878	0.70334	Mixed
PC12	M3	0.0270512	0.224296	971.542	0.120605	0.904029	0.676878	0.70334	Mixed
PC16	P28	0.134916	0.206948	967.106	0.651932	0.5146	0.70334	0.70334	Mixed
PC16	B	-0.223084	0.283313	1028.76	-0.787411	0.431222	0.70334	0.70334	Mixed
PC16	M3	-5.33e-05	0.199115	967.148	-0.000267558	0.999787	0.70334	0.70334	Mixed

## Sheet: Table S17.
Table S17. Associations of time with maternal gut microbiome species (reference time point: 12 weeks of pregnancy (P12); P28: 28 weeks of pregnancy, B: Delivery, M3: 3 months postpartmum; green: FDR<0.05)
Taxa	Phenotype	Estimate	Standard Error	Degrees of Freedom	T-value	Pr(>|t|)	P-value	FDR	Model
Clostridia_unclassified_SGB4121.t__SGB4121	P28	-0.250826	0.147614	983.295	-1.69921	0.0895968	2.3e-18	7.42e-16	Mixed
Clostridia_unclassified_SGB4121.t__SGB4121	B	0.0836216	0.177478	1063.37	0.471167	0.637618	2.3e-18	7.42e-16	Mixed
Clostridia_unclassified_SGB4121.t__SGB4121	M3	0.962525	0.141441	979.435	6.80514	1.76e-11	2.3e-18	7.42e-16	Mixed
Streptococcus_parasanguinis.t__SGB8071	P28	-0.0010384	0.19302	1117.35	-0.00537978	0.995709	5.22e-15	8.4e-13	Mixed
Streptococcus_parasanguinis.t__SGB8071	B	0.0927002	0.22433	1271.5	0.413232	0.679507	5.22e-15	8.4e-13	Mixed
Streptococcus_parasanguinis.t__SGB8071	M3	-1.24071	0.185186	1116.74	-6.69981	3.3e-11	5.22e-15	8.4e-13	Mixed
Streptococcus_salivarius.t__SGB8007_group	P28	0.358562	0.207787	1127.15	1.72562	0.0846891	2.69e-12	2.89e-10	Mixed
Streptococcus_salivarius.t__SGB8007_group	B	0.736662	0.2421	1272.8	3.0428	0.00239186	2.69e-12	2.89e-10	Mixed
Streptococcus_salivarius.t__SGB8007_group	M3	-0.793872	0.19935	1125.58	-3.9823	7.26e-05	2.69e-12	2.89e-10	Mixed
Bilophila_wadsworthia.t__SGB15452	P28	0.0725063	0.172135	1046.71	0.421217	0.673683	5.68e-12	4.57e-10	Mixed
Bilophila_wadsworthia.t__SGB15452	B	-0.0524749	0.20402	1161.66	-0.257204	0.797067	5.68e-12	4.57e-10	Mixed
Bilophila_wadsworthia.t__SGB15452	M3	-0.978232	0.165058	1041.38	-5.92659	4.2e-09	5.68e-12	4.57e-10	Mixed
Escherichia_coli.t__SGB10068	P28	-0.487932	0.259933	1141.22	-1.87714	0.0607534	1.38e-11	8.89e-10	Mixed
Escherichia_coli.t__SGB10068	B	0.485013	0.30053	1302.06	1.61386	0.106801	1.38e-11	8.89e-10	Mixed
Escherichia_coli.t__SGB10068	M3	-1.42743	0.24938	1142.91	-5.72393	1.33e-08	1.38e-11	8.89e-10	Mixed
GGB9522_SGB14921.t__SGB14921	P28	0.0486313	0.154057	1106.09	0.315671	0.752312	5.24e-11	2.81e-09	Mixed
GGB9522_SGB14921.t__SGB14921	B	0.359062	0.179665	1254.08	1.99851	0.0458771	5.24e-11	2.81e-09	Mixed
GGB9522_SGB14921.t__SGB14921	M3	0.929898	0.1478	1104.14	6.29159	4.52e-10	5.24e-11	2.81e-09	Mixed
Clostridium_phoceensis.t__SGB15154	P28	0.443567	0.167835	1046.64	2.64287	0.00834353	5.21e-09	2.4e-07	Mixed
Clostridium_phoceensis.t__SGB15154	B	0.342488	0.198258	1170.89	1.72748	0.0843444	5.21e-09	2.4e-07	Mixed
Clostridium_phoceensis.t__SGB15154	M3	1.02269	0.16096	1041.5	6.35372	3.14e-10	5.21e-09	2.4e-07	Mixed
GGB3570_SGB4777.t__SGB4777	P28	0.292374	0.135994	1048.05	2.14991	0.0317904	1.06e-08	4.27e-07	Mixed
GGB3570_SGB4777.t__SGB4777	B	0.338438	0.161129	1163.77	2.10041	0.0359074	1.06e-08	4.27e-07	Mixed
GGB3570_SGB4777.t__SGB4777	M3	0.812341	0.130405	1042.73	6.22939	6.78e-10	1.06e-08	4.27e-07	Mixed
Blautia_wexlerae.t__SGB4837_group	P28	0.105714	0.099758	1023.17	1.05971	0.289527	1.42e-08	5.08e-07	Mixed
Blautia_wexlerae.t__SGB4837_group	B	0.453049	0.119422	1112.75	3.79368	0.00015642	1.42e-08	5.08e-07	Mixed
Blautia_wexlerae.t__SGB4837_group	M3	0.543369	0.0956075	1018.55	5.68333	1.72e-08	1.42e-08	5.08e-07	Mixed
Dorea_formicigenerans.t__SGB4575	P28	0.323865	0.137038	1106.07	2.36333	0.0182837	3.26e-08	1.05e-06	Mixed
Dorea_formicigenerans.t__SGB4575	B	0.638823	0.161321	1230.19	3.95996	7.93e-05	3.26e-08	1.05e-06	Mixed
Dorea_formicigenerans.t__SGB4575	M3	0.776953	0.131441	1101.67	5.91102	4.53e-09	3.26e-08	1.05e-06	Mixed
Haemophilus_parainfluenzae.t__SGB9712_group	P28	-0.564673	0.224446	1114.98	-2.51585	0.0120141	4.22e-08	1.24e-06	Mixed
Haemophilus_parainfluenzae.t__SGB9712_group	B	-1.518	0.261208	1266.28	-5.81143	7.83e-09	4.22e-08	1.24e-06	Mixed
Haemophilus_parainfluenzae.t__SGB9712_group	M3	-0.932094	0.215335	1113.82	-4.32857	1.64e-05	4.22e-08	1.24e-06	Mixed
Firmicutes_bacterium.t__SGB49188	P28	-0.138835	0.171524	1099.36	-0.809419	0.418449	1.18e-07	3.15e-06	Mixed
Firmicutes_bacterium.t__SGB49188	B	-1.15883	0.200637	1241.03	-5.77573	9.68e-09	1.18e-07	3.15e-06	Mixed
Firmicutes_bacterium.t__SGB49188	M3	-0.434361	0.164549	1096.4	-2.6397	0.00841579	1.18e-07	3.15e-06	Mixed
Anaerostipes_hadrus.t__SGB4540_group	P28	0.0978735	0.121133	1030.51	0.807984	0.419286	2.18e-07	4.8e-06	Mixed
Anaerostipes_hadrus.t__SGB4540_group	B	0.333406	0.144473	1129.85	2.30774	0.0211935	2.18e-07	4.8e-06	Mixed
Anaerostipes_hadrus.t__SGB4540_group	M3	0.622332	0.116116	1025.39	5.35957	1.03e-07	2.18e-07	4.8e-06	Mixed
Anaerotignum_faecicola.t__SGB5190	P28	-0.334795	0.178014	997.153	-1.88073	0.0603002	2.06e-07	4.8e-06	Mixed
Anaerotignum_faecicola.t__SGB5190	B	0.136288	0.212989	1090.4	0.639884	0.522383	2.06e-07	4.8e-06	Mixed
Anaerotignum_faecicola.t__SGB5190	M3	0.637449	0.170612	992.35	3.73625	0.00019744	2.06e-07	4.8e-06	Mixed
Faecalibacillus_intestinalis.t__SGB6754	P28	0.22056	0.174382	1048.86	1.26481	0.206221	2.23e-07	4.8e-06	Mixed
Faecalibacillus_intestinalis.t__SGB6754	B	0.674417	0.206143	1170.77	3.27161	0.00110057	2.23e-07	4.8e-06	Mixed
Faecalibacillus_intestinalis.t__SGB6754	M3	0.905609	0.167233	1043.66	5.41525	7.6e-08	2.23e-07	4.8e-06	Mixed
Dialister_invisus.t__SGB5825_group	P28	0.116486	0.168135	937.555	0.692811	0.4886	2.78e-07	5.59e-06	Mixed
Dialister_invisus.t__SGB5825_group	B	-0.486594	0.204366	987.124	-2.381	0.0174545	2.78e-07	5.59e-06	Mixed
Dialister_invisus.t__SGB5825_group	M3	0.591376	0.161037	936.507	3.6723	0.000253985	2.78e-07	5.59e-06	Mixed
Intestinibacter_bartlettii.t__SGB6140	P28	0.646653	0.177438	1113.35	3.64438	0.000280401	5.36e-07	1.02e-05	Mixed
Intestinibacter_bartlettii.t__SGB6140	B	1.06505	0.206676	1262.89	5.15325	2.97e-07	5.36e-07	1.02e-05	Mixed
Intestinibacter_bartlettii.t__SGB6140	M3	0.32095	0.170235	1111.87	1.88534	0.0596444	5.36e-07	1.02e-05	Mixed
Dorea_sp_AF24_7LB.t__SGB4571	P28	-0.177886	0.15377	1052.54	-1.15683	0.247603	7.27e-07	1.3e-05	Mixed
Dorea_sp_AF24_7LB.t__SGB4571	B	0.497227	0.181947	1171.37	2.73282	0.00637393	7.27e-07	1.3e-05	Mixed
Dorea_sp_AF24_7LB.t__SGB4571	M3	0.573568	0.147459	1047.3	3.88966	0.000106712	7.27e-07	1.3e-05	Mixed
Agathobaculum_butyriciproducens.t__SGB14993_group	P28	0.24334	0.180215	1113.9	1.35027	0.177202	2.08e-06	3.52e-05	Mixed
Agathobaculum_butyriciproducens.t__SGB14993_group	B	0.890452	0.210078	1261.31	4.23866	2.41e-05	2.08e-06	3.52e-05	Mixed
Agathobaculum_butyriciproducens.t__SGB14993_group	M3	0.786759	0.172897	1112.13	4.55044	5.94e-06	2.08e-06	3.52e-05	Mixed
Clostridiaceae_bacterium.t__SGB4269	P28	0.186416	0.139612	1107.16	1.33524	0.182072	2.45e-06	3.94e-05	Mixed
Clostridiaceae_bacterium.t__SGB4269	B	0.00675587	0.164183	1233.7	0.0411483	0.967184	2.45e-06	3.94e-05	Mixed
Clostridiaceae_bacterium.t__SGB4269	M3	0.638703	0.133916	1102.94	4.76945	2.09e-06	2.45e-06	3.94e-05	Mixed
Roseburia_sp_AF02_12.t__SGB4938	P28	0.0572218	0.242667	1111.27	0.235804	0.813628	4.48e-06	6.87e-05	Mixed
Roseburia_sp_AF02_12.t__SGB4938	B	-0.58948	0.282418	1263.38	-2.08726	0.0370646	4.48e-06	6.87e-05	Mixed
Roseburia_sp_AF02_12.t__SGB4938	M3	-1.00747	0.232817	1110.11	-4.3273	1.65e-05	4.48e-06	6.87e-05	Mixed
Eggerthella_lenta.t__SGB14809	P28	0.299309	0.156804	1017.66	1.90881	0.0565678	5.36e-06	7.85e-05	Mixed
Eggerthella_lenta.t__SGB14809	B	0.940112	0.186812	1121.37	5.03238	5.64e-07	5.36e-06	7.85e-05	Mixed
Eggerthella_lenta.t__SGB14809	M3	0.529011	0.150318	1012.39	3.51927	0.000451984	5.36e-06	7.85e-05	Mixed
Bifidobacterium_longum.t__SGB17248	P28	0.589428	0.140512	1005.41	4.19487	2.97e-05	1.41e-05	0.000197514	Mixed
Bifidobacterium_longum.t__SGB17248	B	0.63055	0.167755	1104.22	3.75875	0.000179701	1.41e-05	0.000197514	Mixed
Bifidobacterium_longum.t__SGB17248	M3	0.520652	0.134685	1000.31	3.8657	0.000117916	1.41e-05	0.000197514	Mixed
Clostridia_bacterium.t__SGB13981	P28	-0.270128	0.187772	1098.24	-1.4386	0.15055	1.84e-05	0.00024653	Mixed
Clostridia_bacterium.t__SGB13981	B	-0.845127	0.220331	1232.06	-3.83572	0.000131537	1.84e-05	0.00024653	Mixed
Clostridia_bacterium.t__SGB13981	M3	-0.778139	0.180122	1094.44	-4.32006	1.7e-05	1.84e-05	0.00024653	Mixed
Clostridia_unclassified_SGB6276.t__SGB6276	P28	-0.0625984	0.202968	1039.45	-0.308414	0.757829	2.68e-05	0.000319118	Mixed
Clostridia_unclassified_SGB6276.t__SGB6276	B	-0.439073	0.24048	1156.29	-1.82582	0.0681353	2.68e-05	0.000319118	Mixed
Clostridia_unclassified_SGB6276.t__SGB6276	M3	-0.843151	0.194627	1034.09	-4.33214	1.62e-05	2.68e-05	0.000319118	Mixed
Clostridium_sp_AF15_49.t__SGB5111	P28	-0.162549	0.21253	1034.57	-0.764829	0.444548	2.56e-05	0.000319118	Mixed
Clostridium_sp_AF15_49.t__SGB5111	B	-0.126519	0.252089	1148.91	-0.501884	0.615845	2.56e-05	0.000319118	Mixed
Clostridium_sp_AF15_49.t__SGB5111	M3	-0.892574	0.203785	1029.18	-4.37997	1.31e-05	2.56e-05	0.000319118	Mixed
Lachnospiraceae_bacterium.t__SGB4832	P28	0.0588273	0.154032	1050.96	0.381917	0.7026	2.67e-05	0.000319118	Mixed
Lachnospiraceae_bacterium.t__SGB4832	B	0.594767	0.181953	1174.59	3.26879	0.00111136	2.67e-05	0.000319118	Mixed
Lachnospiraceae_bacterium.t__SGB4832	M3	0.595292	0.147721	1045.84	4.02983	5.99e-05	2.67e-05	0.000319118	Mixed
GGB9602_SGB15031.t__SGB15031	P28	-0.313893	0.151062	964.51	-2.07791	0.0379817	3.53e-05	0.000406271	Mixed
GGB9602_SGB15031.t__SGB15031	B	-0.499402	0.182402	1032.99	-2.73791	0.00628928	3.53e-05	0.000406271	Mixed
GGB9602_SGB15031.t__SGB15031	M3	-0.689758	0.144716	961.699	-4.76629	2.17e-06	3.53e-05	0.000406271	Mixed
Blautia_massiliensis.t__SGB4826_group	P28	0.304809	0.171044	1038.78	1.78205	0.0750335	3.78e-05	0.000420043	Mixed
Blautia_massiliensis.t__SGB4826_group	B	0.700714	0.203426	1145.13	3.44456	0.000592685	3.78e-05	0.000420043	Mixed
Blautia_massiliensis.t__SGB4826_group	M3	0.731683	0.163984	1033.47	4.46192	9.01e-06	3.78e-05	0.000420043	Mixed
GGB9176_SGB14114.t__SGB14114	P28	-0.111634	0.186394	1036.85	-0.598915	0.54936	5.28e-05	0.000537217	Mixed
GGB9176_SGB14114.t__SGB14114	B	-1.00114	0.221467	1146.12	-4.52051	6.81e-06	5.28e-05	0.000537217	Mixed
GGB9176_SGB14114.t__SGB14114	M3	-0.464146	0.17871	1031.49	-2.59721	0.00953236	5.28e-05	0.000537217	Mixed
Clostridium_sp_AF27_2AA.t__SGB4712	P28	0.0670976	0.185655	1097.42	0.361411	0.717862	5.34e-05	0.000537217	Mixed
Clostridium_sp_AF27_2AA.t__SGB4712	B	0.0380757	0.217014	1241.3	0.175453	0.860753	5.34e-05	0.000537217	Mixed
Clostridium_sp_AF27_2AA.t__SGB4712	M3	0.714879	0.178108	1094.67	4.01374	6.38e-05	5.34e-05	0.000537217	Mixed
Akkermansia_muciniphila.t__SGB9226	P28	0.0873932	0.254713	1038.01	0.343104	0.73159	5.14e-05	0.000537217	Mixed
Akkermansia_muciniphila.t__SGB9226	B	-0.554738	0.301479	1157.91	-1.84006	0.0660158	5.14e-05	0.000537217	Mixed
Akkermansia_muciniphila.t__SGB9226	M3	-0.940458	0.244257	1032.69	-3.85028	0.000125237	5.14e-05	0.000537217	Mixed
Lachnospiraceae_bacterium.t__SGB4957	P28	0.0534699	0.145132	1011.01	0.368423	0.712635	5.92e-05	0.000577912	Mixed
Lachnospiraceae_bacterium.t__SGB4957	B	0.130557	0.173124	1111.76	0.754126	0.450933	5.92e-05	0.000577912	Mixed
Lachnospiraceae_bacterium.t__SGB4957	M3	0.574869	0.13912	1005.84	4.13219	3.89e-05	5.92e-05	0.000577912	Mixed
GGB45432_SGB63101.t__SGB63101	P28	0.17028	0.144315	1086.01	1.17991	0.238293	7.63e-05	0.000722414	Mixed
GGB45432_SGB63101.t__SGB63101	B	0.780497	0.168633	1233.08	4.62838	4.07e-06	7.63e-05	0.000722414	Mixed
GGB45432_SGB63101.t__SGB63101	M3	0.31635	0.13845	1083.34	2.28494	0.0225091	7.63e-05	0.000722414	Mixed
Clostridia_bacterium.t__SGB14311	P28	-0.266695	0.182674	1007.89	-1.45995	0.144615	8.39e-05	0.000772146	Mixed
Clostridia_bacterium.t__SGB14311	B	-0.812855	0.218089	1106.53	-3.72717	0.000203432	8.39e-05	0.000772146	Mixed
Clostridia_bacterium.t__SGB14311	M3	-0.697179	0.175099	1002.8	-3.98162	7.34e-05	8.39e-05	0.000772146	Mixed
Lacrimispora_amygdalina.t__SGB4716	P28	-0.276815	0.175008	1103.39	-1.58173	0.113999	9.3e-05	0.000810396	Mixed
Lacrimispora_amygdalina.t__SGB4716	B	-0.635353	0.203794	1255.78	-3.11763	0.00186455	9.3e-05	0.000810396	Mixed
Lacrimispora_amygdalina.t__SGB4716	M3	0.193114	0.167903	1101.99	1.15015	0.250331	9.3e-05	0.000810396	Mixed
Faecalibacterium_prausnitzii.t__SGB15316_group	P28	-0.438167	0.107163	1026.45	-4.08879	4.68e-05	9.31e-05	0.000810396	Mixed
Faecalibacterium_prausnitzii.t__SGB15316_group	B	-0.0681928	0.127168	1140.45	-0.536244	0.591895	9.31e-05	0.000810396	Mixed
Faecalibacterium_prausnitzii.t__SGB15316_group	M3	-0.0289925	0.102751	1021.02	-0.282162	0.777877	9.31e-05	0.000810396	Mixed
Clostridia_unclassified_SGB6317.t__SGB6317	P28	0.222728	0.189454	1045.16	1.17563	0.24001	0.000108418	0.000918698	Mixed
Clostridia_unclassified_SGB6317.t__SGB6317	B	0.499019	0.224201	1164.58	2.22577	0.0262206	0.000108418	0.000918698	Mixed
Clostridia_unclassified_SGB6317.t__SGB6317	M3	-0.367905	0.181678	1039.88	-2.02504	0.0431182	0.000108418	0.000918698	Mixed
GGB9494_SGB14891.t__SGB14891	P28	0.229741	0.146749	1061.64	1.56553	0.117756	0.000111547	0.000920981	Mixed
GGB9494_SGB14891.t__SGB14891	B	0.311209	0.172489	1197.32	1.80423	0.0714471	0.000111547	0.000920981	Mixed
GGB9494_SGB14891.t__SGB14891	M3	0.633279	0.140764	1057.31	4.49887	7.59e-06	0.000111547	0.000920981	Mixed
Lachnospiraceae_bacterium.t__SGB4750	P28	0.121693	0.169419	1087.54	0.718295	0.47273	0.000114511	0.000921813	Mixed
Lachnospiraceae_bacterium.t__SGB4750	B	-0.450033	0.198394	1228.63	-2.26837	0.0234793	0.000114511	0.000921813	Mixed
Lachnospiraceae_bacterium.t__SGB4750	M3	0.414878	0.162526	1084.22	2.55269	0.0108255	0.000114511	0.000921813	Mixed
Clostridium_sp_AM22_11AC.t__SGB4749	P28	0.213461	0.161857	1047.47	1.31882	0.187517	0.000129553	0.00101746	Mixed
Clostridium_sp_AM22_11AC.t__SGB4749	B	-0.0958778	0.191394	1168.73	-0.500944	0.616505	0.000129553	0.00101746	Mixed
Clostridium_sp_AM22_11AC.t__SGB4749	M3	0.59183	0.155219	1042.24	3.81286	0.000145424	0.000129553	0.00101746	Mixed
GGB9623_SGB15076.t__SGB15076	P28	0.492056	0.171223	1019.69	2.87377	0.0041402	0.000181036	0.00135566	Mixed
GGB9623_SGB15076.t__SGB15076	B	0.238019	0.203431	1131.02	1.17003	0.242237	0.000181036	0.00135566	Mixed
GGB9623_SGB15076.t__SGB15076	M3	-0.190591	0.164164	1014.26	-1.16098	0.245923	0.000181036	0.00135566	Mixed
Ruthenibacterium_lactatiformans.t__SGB15271	P28	0.0558158	0.150476	1064.25	0.370928	0.710765	0.000180102	0.00135566	Mixed
Ruthenibacterium_lactatiformans.t__SGB15271	B	0.725537	0.176867	1199.53	4.10215	4.37e-05	0.000180102	0.00135566	Mixed
Ruthenibacterium_lactatiformans.t__SGB15271	M3	0.0331453	0.144338	1059.94	0.229636	0.818419	0.000180102	0.00135566	Mixed
Flavonifractor_plautii.t__SGB15132	P28	0.198922	0.207335	1031.22	0.959423	0.337571	0.000192357	0.00140771	Mixed
Flavonifractor_plautii.t__SGB15132	B	0.963716	0.246113	1143.81	3.91575	9.55e-05	0.000192357	0.00140771	Mixed
Flavonifractor_plautii.t__SGB15132	M3	0.657116	0.198796	1025.81	3.30548	0.000980988	0.000192357	0.00140771	Mixed
Clostridium_spiroforme.t__SGB6747	P28	0.120579	0.149806	1062.23	0.804898	0.421059	0.000233475	0.00167064	Mixed
Clostridium_spiroforme.t__SGB6747	B	0.768477	0.176346	1193.74	4.35778	1.43e-05	0.000233475	0.00167064	Mixed
Clostridium_spiroforme.t__SGB6747	M3	0.227634	0.143689	1057.63	1.58421	0.113444	0.000233475	0.00167064	Mixed
Coprococcus_catus.t__SGB4670	P28	0.303925	0.137861	1023.09	2.20458	0.0277058	0.000247666	0.00173366	Mixed
Coprococcus_catus.t__SGB4670	B	0.69835	0.164432	1123.03	4.24704	2.35e-05	0.000247666	0.00173366	Mixed
Coprococcus_catus.t__SGB4670	M3	0.365775	0.132151	1017.95	2.76786	0.00574496	0.000247666	0.00173366	Mixed
Ruminococcus_torques.t__SGB4563_group	P28	0.105106	0.1546	1047.54	0.679859	0.496744	0.000275161	0.00188514	Mixed
Ruminococcus_torques.t__SGB4563_group	B	0.756592	0.18353	1157.99	4.12245	4.02e-05	0.000275161	0.00188514	Mixed
Ruminococcus_torques.t__SGB4563_group	M3	0.383367	0.148233	1042.21	2.58625	0.00983742	0.000275161	0.00188514	Mixed
Lachnospiraceae_bacterium.t__SGB4782	P28	-0.104428	0.15994	1063.1	-0.65292	0.513949	0.00028803	0.0019322	Mixed
Lachnospiraceae_bacterium.t__SGB4782	B	0.266033	0.188609	1189.65	1.4105	0.158654	0.00028803	0.0019322	Mixed
Lachnospiraceae_bacterium.t__SGB4782	M3	-0.464145	0.153398	1058.23	-3.02575	0.00254006	0.00028803	0.0019322	Mixed
Roseburia_inulinivorans.t__SGB4940	P28	0.199964	0.196265	1147.34	1.01884	0.308492	0.000300292	0.00197335	Mixed
Roseburia_inulinivorans.t__SGB4940	B	0.256487	0.227813	1297.23	1.12587	0.26043	0.000300292	0.00197335	Mixed
Roseburia_inulinivorans.t__SGB4940	M3	0.772779	0.188301	1147.28	4.10396	4.35e-05	0.000300292	0.00197335	Mixed
Evtepia_gabavorous.t__SGB15120	P28	-0.074063	0.12449	947.386	-0.594933	0.55203	0.000312582	0.00201302	Mixed
Evtepia_gabavorous.t__SGB15120	B	0.540237	0.150854	1005.92	3.5812	0.000358384	0.000312582	0.00201302	Mixed
Evtepia_gabavorous.t__SGB15120	M3	0.274114	0.119244	945.528	2.29876	0.0217358	0.000312582	0.00201302	Mixed
GGB3478_SGB4643.t__SGB4643	P28	-0.168284	0.184749	1027.8	-0.910876	0.362574	0.00045487	0.00287192	Mixed
GGB3478_SGB4643.t__SGB4643	B	-0.382446	0.219112	1143.26	-1.74544	0.081177	0.00045487	0.00287192	Mixed
GGB3478_SGB4643.t__SGB4643	M3	-0.710386	0.177148	1022.37	-4.01012	6.51e-05	0.00045487	0.00287192	Mixed
Candidatus_Gastranaerophilales_bacterium.t__SGB8601	P28	0.104339	0.2014	1050.03	0.518066	0.604521	0.00053802	0.00333159	Mixed
Candidatus_Gastranaerophilales_bacterium.t__SGB8601	B	-0.436067	0.238208	1170.32	-1.83061	0.0674122	0.00053802	0.00333159	Mixed
Candidatus_Gastranaerophilales_bacterium.t__SGB8601	M3	-0.623011	0.193138	1044.81	-3.22572	0.00129554	0.00053802	0.00333159	Mixed
Collinsella_aerofaciens.t__SGB14546_group	P28	0.265421	0.107876	978.798	2.46042	0.0140493	0.000724757	0.00432749	Mixed
Collinsella_aerofaciens.t__SGB14546_group	B	0.486584	0.129844	1055.92	3.74746	0.000188312	0.000724757	0.00432749	Mixed
Collinsella_aerofaciens.t__SGB14546_group	M3	0.310538	0.10336	975.191	3.00444	0.00272868	0.000724757	0.00432749	Mixed
Blautia_SGB4815.t__SGB4815_group	P28	0.0782851	0.165325	1095.44	0.473524	0.635934	0.000725728	0.00432749	Mixed
Blautia_SGB4815.t__SGB4815_group	B	0.659973	0.194403	1224.29	3.39488	0.000708576	0.000725728	0.00432749	Mixed
Blautia_SGB4815.t__SGB4815_group	M3	0.479382	0.158579	1091.18	3.02298	0.00256143	0.000725728	0.00432749	Mixed
Enterocloster_citroniae.t__SGB4761	P28	0.00185823	0.146664	1085.91	0.01267	0.989893	0.00100358	0.00587548	Mixed
Enterocloster_citroniae.t__SGB4761	B	0.548236	0.171925	1224.59	3.18881	0.00146479	0.00100358	0.00587548	Mixed
Enterocloster_citroniae.t__SGB4761	M3	0.386362	0.140693	1082.3	2.74614	0.00613007	0.00100358	0.00587548	Mixed
GGB4585_SGB6340.t__SGB6340	P28	-0.43409	0.177675	1009.74	-2.44317	0.0147293	0.00129344	0.0074373	Mixed
GGB4585_SGB6340.t__SGB6340	B	-0.166476	0.212037	1109.34	-0.785126	0.432547	0.00129344	0.0074373	Mixed
GGB4585_SGB6340.t__SGB6340	M3	-0.648149	0.170311	1004.61	-3.80569	0.000149961	0.00129344	0.0074373	Mixed
Clostridium_sp_AF34_13.t__SGB4659	P28	0.176165	0.182319	1047.14	0.966243	0.334146	0.0013458	0.00751104	Mixed
Clostridium_sp_AF34_13.t__SGB4659	B	-0.0876116	0.215965	1163.65	-0.405675	0.685056	0.0013458	0.00751104	Mixed
Clostridium_sp_AF34_13.t__SGB4659	M3	0.578839	0.174828	1041.83	3.3109	0.000961876	0.0013458	0.00751104	Mixed
GGB6612_SGB9346.t__SGB9346	P28	0.0674137	0.170938	963.497	0.394375	0.693392	0.00135292	0.00751104	Mixed
GGB6612_SGB9346.t__SGB9346	B	-0.380729	0.20634	1032.92	-1.84515	0.0653017	0.00135292	0.00751104	Mixed
GGB6612_SGB9346.t__SGB9346	M3	-0.508385	0.16376	960.603	-3.10446	0.00196208	0.00135292	0.00751104	Mixed
Odoribacter_splanchnicus.t__SGB1790	P28	-0.188912	0.115407	1107.97	-1.63692	0.101931	0.00149127	0.0081388	Mixed
Odoribacter_splanchnicus.t__SGB1790	B	-0.460464	0.134741	1252.72	-3.41741	0.000652485	0.00149127	0.0081388	Mixed
Odoribacter_splanchnicus.t__SGB1790	M3	-0.358436	0.110718	1105.64	-3.23737	0.00124222	0.00149127	0.0081388	Mixed
Ruminococcus_gnavus.t__SGB4584	P28	-0.0873494	0.177361	1038.75	-0.492495	0.622474	0.00160955	0.00863791	Mixed
Ruminococcus_gnavus.t__SGB4584	B	0.647236	0.210096	1156.27	3.08067	0.00211414	0.00160955	0.00863791	Mixed
Ruminococcus_gnavus.t__SGB4584	M3	0.380943	0.170074	1033.4	2.23987	0.0253114	0.00160955	0.00863791	Mixed
GGB9557_SGB14966.t__SGB14966	P28	0.202793	0.161531	1054.9	1.25544	0.209596	0.00167814	0.00885839	Mixed
GGB9557_SGB14966.t__SGB14966	B	0.352885	0.190646	1180.36	1.851	0.0644196	0.00167814	0.00885839	Mixed
GGB9557_SGB14966.t__SGB14966	M3	0.588532	0.154919	1049.89	3.79897	0.000153641	0.00167814	0.00885839	Mixed
Bacteroides_fragilis.t__SGB1855_group	P28	0.237795	0.171737	957.496	1.38465	0.166483	0.00186604	0.0096914	Mixed
Bacteroides_fragilis.t__SGB1855_group	B	0.601799	0.207626	1022.57	2.89848	0.00382982	0.00186604	0.0096914	Mixed
Bacteroides_fragilis.t__SGB1855_group	M3	-0.0851267	0.164514	955.014	-0.517443	0.604967	0.00186604	0.0096914	Mixed
GGB9342_SGB14306.t__SGB14306	P28	-0.42337	0.221525	1058.61	-1.91116	0.0562535	0.00222187	0.0111788	Mixed
GGB9342_SGB14306.t__SGB14306	B	-0.964135	0.261118	1187.05	-3.69234	0.000232294	0.00222187	0.0111788	Mixed
GGB9342_SGB14306.t__SGB14306	M3	-0.533158	0.212468	1053.78	-2.50936	0.0122442	0.00222187	0.0111788	Mixed
Clostridium_sp_AF34_10BH.t__SGB4914	P28	-0.107786	0.175304	1127.59	-0.614852	0.538777	0.00221183	0.0111788	Mixed
Clostridium_sp_AF34_10BH.t__SGB4914	B	-0.0834025	0.203893	1277.47	-0.40905	0.682572	0.00221183	0.0111788	Mixed
Clostridium_sp_AF34_10BH.t__SGB4914	M3	0.447702	0.168189	1126.69	2.6619	0.00788061	0.00221183	0.0111788	Mixed
Clostridia_bacterium.t__SGB14952	P28	0.251624	0.154888	1068.91	1.62455	0.104553	0.0023206	0.0114959	Mixed
Clostridia_bacterium.t__SGB14952	B	-0.337751	0.182693	1193.97	-1.84874	0.0647426	0.0023206	0.0114959	Mixed
Clostridia_bacterium.t__SGB14952	M3	-0.261302	0.148552	1064.04	-1.759	0.0788655	0.0023206	0.0114959	Mixed
Lachnospiraceae_bacterium_OM04_12BH.t__SGB4893	P28	-0.122719	0.167235	1048.73	-0.733813	0.463227	0.00245262	0.0119658	Mixed
Lachnospiraceae_bacterium_OM04_12BH.t__SGB4893	B	-0.332858	0.197815	1168.97	-1.68267	0.0927057	0.00245262	0.0119658	Mixed
Lachnospiraceae_bacterium_OM04_12BH.t__SGB4893	M3	-0.570225	0.160374	1043.49	-3.55559	0.000394046	0.00245262	0.0119658	Mixed
GGB3746_SGB5089.t__SGB5089	P28	0.399434	0.2308	1124.06	1.73065	0.0837885	0.00305239	0.0146697	Mixed
GGB3746_SGB5089.t__SGB5089	B	0.23965	0.268205	1276.93	0.893534	0.37174	0.00305239	0.0146697	Mixed
GGB3746_SGB5089.t__SGB5089	M3	-0.37059	0.221433	1123.51	-1.6736	0.0944879	0.00305239	0.0146697	Mixed
Clostridiaceae_bacterium_OM08_6BH.t__SGB4768	P28	-0.0309061	0.16902	1102.76	-0.182854	0.854946	0.00327562	0.0152863	Mixed
Clostridiaceae_bacterium_OM08_6BH.t__SGB4768	B	-0.683856	0.197073	1252.01	-3.47006	0.00053803	0.00327562	0.0152863	Mixed
Clostridiaceae_bacterium_OM08_6BH.t__SGB4768	M3	-0.275788	0.162156	1100.88	-1.70076	0.089271	0.00327562	0.0152863	Mixed
Enterocloster_bolteae.t__SGB4758_group	P28	0.15385	0.167292	1044.43	0.919651	0.357968	0.00324793	0.0152863	Mixed
Enterocloster_bolteae.t__SGB4758_group	B	0.640405	0.197937	1164.48	3.23541	0.00124887	0.00324793	0.0152863	Mixed
Enterocloster_bolteae.t__SGB4758_group	M3	0.456518	0.160427	1039.16	2.84564	0.00451932	0.00324793	0.0152863	Mixed
GGB9559_SGB14969.t__SGB14969	P28	0.1936	0.128432	1048.31	1.50741	0.132007	0.00336081	0.0153193	Mixed
GGB9559_SGB14969.t__SGB14969	B	0.479476	0.151986	1167.34	3.15473	0.0016475	0.00336081	0.0153193	Mixed
GGB9559_SGB14969.t__SGB14969	M3	0.383716	0.123161	1043.05	3.11557	0.00188603	0.00336081	0.0153193	Mixed
Gemmiger_SGB15299.t__SGB15299	P28	0.395659	0.157144	986.06	2.51782	0.011966	0.00337786	0.0153193	Mixed
Gemmiger_SGB15299.t__SGB15299	B	0.611267	0.188479	1073.03	3.24316	0.00121856	0.00337786	0.0153193	Mixed
Gemmiger_SGB15299.t__SGB15299	M3	0.219885	0.150591	981.676	1.46015	0.144569	0.00337786	0.0153193	Mixed
Victivallis_vadensis.t__SGB9202	P28	-0.290432	0.142464	1018.99	-2.03863	0.0417442	0.00372791	0.0166721	Mixed
Victivallis_vadensis.t__SGB9202	B	-0.519882	0.170392	1111.49	-3.0511	0.00233411	0.00372791	0.0166721	Mixed
Victivallis_vadensis.t__SGB9202	M3	-0.432516	0.136543	1014.21	-3.16761	0.00158291	0.00372791	0.0166721	Mixed
Bittarella_massiliensis.t__SGB7263	P28	0.139772	0.140019	1116.75	0.998236	0.318381	0.00397813	0.0175474	Mixed
Bittarella_massiliensis.t__SGB7263	B	0.59237	0.163235	1263.32	3.62895	0.00029594	0.00397813	0.0175474	Mixed
Bittarella_massiliensis.t__SGB7263	M3	0.245677	0.134333	1114.95	1.82886	0.0676872	0.00397813	0.0175474	Mixed
Ruminococcaceae_unclassified_SGB15236.t__SGB15236	P28	-0.0624445	0.145841	965.542	-0.428168	0.668624	0.00417396	0.0179202	Mixed
Ruminococcaceae_unclassified_SGB15236.t__SGB15236	B	-0.203574	0.175939	1036.67	-1.15707	0.247509	0.00417396	0.0179202	Mixed
Ruminococcaceae_unclassified_SGB15236.t__SGB15236	M3	-0.462551	0.13972	962.49	-3.31056	0.000965696	0.00417396	0.0179202	Mixed
Holdemania_filiformis.t__SGB4046	P28	-0.226692	0.139782	1049.23	-1.62176	0.105155	0.00416724	0.0179202	Mixed
Holdemania_filiformis.t__SGB4046	B	-0.0257362	0.165635	1164.51	-0.155379	0.876549	0.00416724	0.0179202	Mixed
Holdemania_filiformis.t__SGB4046	M3	0.24972	0.134036	1043.92	1.86308	0.0627316	0.00416724	0.0179202	Mixed
Gemmiger_formicilis.t__SGB15300	P28	0.195648	0.140867	1012.13	1.38888	0.165173	0.00445526	0.0188762	Mixed
Gemmiger_formicilis.t__SGB15300	B	0.547074	0.168031	1112.87	3.25579	0.00116484	0.00445526	0.0188762	Mixed
Gemmiger_formicilis.t__SGB15300	M3	0.381964	0.135032	1006.96	2.82869	0.00476658	0.00445526	0.0188762	Mixed
Dysosmobacter_welbionis.t__SGB15078	P28	0.143281	0.136996	1060.51	1.04588	0.295855	0.00463532	0.0193841	Mixed
Dysosmobacter_welbionis.t__SGB15078	B	0.332117	0.16168	1185.3	2.05417	0.0401785	0.00463532	0.0193841	Mixed
Dysosmobacter_welbionis.t__SGB15078	M3	-0.170604	0.131388	1055.53	-1.29847	0.19441	0.00463532	0.0193841	Mixed
Senegalimassilia_anaerobia.t__SGB14824_group	P28	0.0153648	0.129958	992.584	0.118229	0.90591	0.00502039	0.0207075	Mixed
Senegalimassilia_anaerobia.t__SGB14824_group	B	0.520779	0.155885	1078.87	3.34079	0.000864009	0.00502039	0.0207075	Mixed
Senegalimassilia_anaerobia.t__SGB14824_group	M3	0.0408761	0.124539	988.235	0.32822	0.742815	0.00502039	0.0207075	Mixed
Mediterraneibacter_butyricigenes.t__SGB25493	P28	0.15483	0.1407	1124.52	1.10042	0.271383	0.00520903	0.0207075	Mixed
Mediterraneibacter_butyricigenes.t__SGB25493	B	0.349641	0.163359	1279.46	2.14032	0.0325172	0.00520903	0.0207075	Mixed
Mediterraneibacter_butyricigenes.t__SGB25493	M3	0.457091	0.134991	1124.33	3.38609	0.00073346	0.00520903	0.0207075	Mixed
GGB9699_SGB15216.t__SGB15216	P28	-0.0890715	0.158473	1047.33	-0.562061	0.574195	0.00513702	0.0207075	Mixed
GGB9699_SGB15216.t__SGB15216	B	-0.132273	0.18708	1173.24	-0.707037	0.479684	0.00513702	0.0207075	Mixed
GGB9699_SGB15216.t__SGB15216	M3	-0.495906	0.151985	1042.26	-3.26287	0.00113871	0.00513702	0.0207075	Mixed
Ruminococcaceae_unclassified_SGB15233.t__SGB15233	P28	0.0248816	0.16745	989.235	0.148591	0.881907	0.00515754	0.0207075	Mixed
Ruminococcaceae_unclassified_SGB15233.t__SGB15233	B	0.0719726	0.200963	1074.2	0.358138	0.72031	0.00515754	0.0207075	Mixed
Ruminococcaceae_unclassified_SGB15233.t__SGB15233	M3	-0.430693	0.160462	984.987	-2.68407	0.00739513	0.00515754	0.0207075	Mixed
Ruminococcus_bicirculans.t__SGB4262	P28	0.0800511	0.206053	1045.51	0.388497	0.697727	0.00547346	0.0214934	Mixed
Ruminococcus_bicirculans.t__SGB4262	B	0.0224658	0.243373	1170.27	0.0923105	0.926467	0.00547346	0.0214934	Mixed
Ruminococcus_bicirculans.t__SGB4262	M3	0.599791	0.197613	1040.38	3.03519	0.00246364	0.00547346	0.0214934	Mixed
Lachnospiraceae_unclassified_SGB4894.t__SGB4894	P28	-0.449131	0.181551	1034.96	-2.47385	0.013526	0.00590862	0.0229226	Mixed
Lachnospiraceae_unclassified_SGB4894.t__SGB4894	B	-0.552475	0.215365	1148.97	-2.5653	0.0104346	0.00590862	0.0229226	Mixed
Lachnospiraceae_unclassified_SGB4894.t__SGB4894	M3	-0.557196	0.17408	1029.57	-3.2008	0.00141238	0.00590862	0.0229226	Mixed
Coprobacter_fastidiosus.t__SGB1963	P28	-0.135766	0.173809	1009.12	-0.781121	0.434914	0.00655514	0.025128	Mixed
Coprobacter_fastidiosus.t__SGB1963	B	-0.505165	0.207399	1109.12	-2.43571	0.0150191	0.00655514	0.025128	Mixed
Coprobacter_fastidiosus.t__SGB1963	M3	-0.517184	0.166606	1003.97	-3.10423	0.00196116	0.00655514	0.025128	Mixed
Dorea_sp_AF36_15AT.t__SGB4552_group	P28	0.254195	0.163595	1084.17	1.55381	0.120522	0.0068499	0.0256473	Mixed
Dorea_sp_AF36_15AT.t__SGB4552_group	B	0.643739	0.192405	1214.48	3.34575	0.000845673	0.0068499	0.0256473	Mixed
Dorea_sp_AF36_15AT.t__SGB4552_group	M3	0.374781	0.156919	1079.82	2.38837	0.0170943	0.0068499	0.0256473	Mixed
Faecalibacterium_prausnitzii.t__SGB15323	P28	-0.177645	0.171256	963.259	-1.0373	0.299854	0.0068258	0.0256473	Mixed
Faecalibacterium_prausnitzii.t__SGB15323	B	0.00031439	0.206855	1030.82	0.00151986	0.998788	0.0068258	0.0256473	Mixed
Faecalibacterium_prausnitzii.t__SGB15323	M3	-0.510921	0.16406	960.534	-3.11423	0.00189893	0.0068258	0.0256473	Mixed
Pseudoflavonifractor_SGB15156.t__SGB15156_group	P28	0.179945	0.1768	1056.04	1.01779	0.30901	0.00698576	0.0258553	Mixed
Pseudoflavonifractor_SGB15156.t__SGB15156_group	B	0.0812935	0.208457	1184.09	0.389977	0.696624	0.00698576	0.0258553	Mixed
Pseudoflavonifractor_SGB15156.t__SGB15156_group	M3	-0.361203	0.16957	1051.15	-2.13012	0.0333936	0.00698576	0.0258553	Mixed
Ruminococcaceae_bacterium.t__SGB15249	P28	-0.0935824	0.138525	956.697	-0.675564	0.499481	0.00730563	0.026732	Mixed
Ruminococcaceae_bacterium.t__SGB15249	B	-0.274245	0.167441	1022.39	-1.63787	0.101757	0.00730563	0.026732	Mixed
Ruminococcaceae_bacterium.t__SGB15249	M3	-0.43092	0.1327	954.159	-3.24733	0.00120556	0.00730563	0.026732	Mixed
GGB9581_SGB14999.t__SGB14999	P28	-0.118686	0.152782	993.669	-0.776835	0.437441	0.00784871	0.0283247	Mixed
GGB9581_SGB14999.t__SGB14999	B	0.156344	0.183008	1083.89	0.854299	0.393128	0.00784871	0.0283247	Mixed
GGB9581_SGB14999.t__SGB14999	M3	0.360883	0.146421	989.054	2.4647	0.0138819	0.00784871	0.0283247	Mixed
Dorea_longicatena.t__SGB4582_group	P28	0.0879603	0.169567	1004.87	0.518734	0.604061	0.00791684	0.0283247	Mixed
Dorea_longicatena.t__SGB4582_group	B	0.654117	0.202618	1101.25	3.22832	0.00128196	0.00791684	0.0283247	Mixed
Dorea_longicatena.t__SGB4582_group	M3	0.342432	0.162528	999.886	2.1069	0.0353745	0.00791684	0.0283247	Mixed
Anaerotruncus_rubiinfantis.t__SGB25416	P28	-0.199738	0.141616	1090.64	-1.41042	0.158701	0.00821619	0.0290727	Mixed
Anaerotruncus_rubiinfantis.t__SGB25416	B	-0.523582	0.165879	1230.46	-3.15641	0.00163601	0.00821619	0.0290727	Mixed
Anaerotruncus_rubiinfantis.t__SGB25416	M3	-0.353498	0.135853	1087.26	-2.60206	0.00939256	0.00821619	0.0290727	Mixed
Clostridia_bacterium.t__SGB3957	P28	-0.292148	0.153746	1083.51	-1.9002	0.057672	0.00890701	0.0311745	Mixed
Clostridia_bacterium.t__SGB3957	B	0.197613	0.180531	1218.18	1.09462	0.2739	0.00890701	0.0311745	Mixed
Clostridia_bacterium.t__SGB3957	M3	0.184917	0.14748	1079.49	1.25384	0.21017	0.00890701	0.0311745	Mixed
Eubacteriaceae_bacterium.t__SGB3958	P28	0.120555	0.129123	1098.1	0.933646	0.350692	0.00911916	0.0315739	Mixed
Eubacteriaceae_bacterium.t__SGB3958	B	0.450346	0.15096	1241.37	2.9832	0.00290821	0.00911916	0.0315739	Mixed
Eubacteriaceae_bacterium.t__SGB3958	M3	0.322185	0.123874	1095.3	2.60092	0.00942278	0.00911916	0.0315739	Mixed
GGB9186_SGB14125.t__SGB14125	P28	-0.0827368	0.151629	1063.02	-0.545652	0.58542	0.00926741	0.0317458	Mixed
GGB9186_SGB14125.t__SGB14125	B	-0.588059	0.178775	1190.09	-3.28938	0.00103347	0.00926741	0.0317458	Mixed
GGB9186_SGB14125.t__SGB14125	M3	-0.10465	0.145429	1058.17	-0.719598	0.471932	0.00926741	0.0317458	Mixed
GGB51441_SGB71759.t__SGB71759	P28	0.180053	0.140449	1052.47	1.28198	0.200131	0.00937857	0.0317884	Mixed
GGB51441_SGB71759.t__SGB71759	B	0.227214	0.166257	1170.11	1.36664	0.172001	0.00937857	0.0317884	Mixed
GGB51441_SGB71759.t__SGB71759	M3	0.451439	0.134683	1047.21	3.35187	0.000831357	0.00937857	0.0317884	Mixed
Blautia_sp_MSK_20_85.t__SGB4828_group	P28	0.187833	0.171146	996.875	1.0975	0.272688	0.0101427	0.0340204	Mixed
Blautia_sp_MSK_20_85.t__SGB4828_group	B	0.395951	0.204805	1089.69	1.93331	0.0534567	0.0101427	0.0340204	Mixed
Blautia_sp_MSK_20_85.t__SGB4828_group	M3	0.531059	0.164029	992.097	3.23759	0.00124539	0.0101427	0.0340204	Mixed
Prevotella_copri_clade_A.t__SGB1626	P28	0.271515	0.169068	941.729	1.60596	0.108619	0.0105922	0.0351617	Mixed
Prevotella_copri_clade_A.t__SGB1626	B	0.329952	0.205313	993.949	1.60707	0.108356	0.0105922	0.0351617	Mixed
Prevotella_copri_clade_A.t__SGB1626	M3	0.542226	0.161934	940.446	3.34844	0.000844936	0.0105922	0.0351617	Mixed
GGB6649_SGB9391.t__SGB9391	P28	-0.147326	0.151009	984.713	-0.97561	0.329497	0.0107226	0.0352315	Mixed
GGB6649_SGB9391.t__SGB9391	B	-0.575552	0.181288	1069.06	-3.17479	0.0015423	0.0107226	0.0352315	Mixed
GGB6649_SGB9391.t__SGB9391	M3	-0.32694	0.144705	980.52	-2.25936	0.0240801	0.0107226	0.0352315	Mixed
Gordonibacter_pamelaeae.t__SGB14807	P28	0.249421	0.138542	1051.15	1.80034	0.0720942	0.0110318	0.0358812	Mixed
Gordonibacter_pamelaeae.t__SGB14807	B	0.532109	0.163676	1174.41	3.251	0.00118267	0.0110318	0.0358812	Mixed
Gordonibacter_pamelaeae.t__SGB14807	M3	0.238012	0.132865	1046.01	1.79138	0.0735214	0.0110318	0.0358812	Mixed
Clostridia_bacterium.t__SGB14252	P28	-0.322814	0.166687	1079.62	-1.93665	0.0530493	0.0117546	0.0374752	Mixed
Clostridia_bacterium.t__SGB14252	B	-0.620858	0.196171	1208.95	-3.16488	0.00159018	0.0117546	0.0374752	Mixed
Clostridia_bacterium.t__SGB14252	M3	-0.23123	0.159881	1075.13	-1.44626	0.148396	0.0117546	0.0374752	Mixed
Clostridia_bacterium.t__SGB14263	P28	-0.118226	0.132436	967.692	-0.892706	0.372237	0.0117251	0.0374752	Mixed
Clostridia_bacterium.t__SGB14263	B	0.131028	0.159586	1042.06	0.821045	0.411809	0.0117251	0.0374752	Mixed
Clostridia_bacterium.t__SGB14263	M3	-0.321523	0.126884	964.35	-2.53399	0.0114345	0.0117251	0.0374752	Mixed
Candidatus_Cibiobacter_qucibialis.t__SGB15286	P28	-0.0431028	0.115312	1015.84	-0.373793	0.708636	0.012972	0.0409509	Mixed
Candidatus_Cibiobacter_qucibialis.t__SGB15286	B	-0.0485322	0.137636	1114.43	-0.352614	0.724445	0.012972	0.0409509	Mixed
Candidatus_Cibiobacter_qucibialis.t__SGB15286	M3	-0.318176	0.110532	1010.76	-2.87859	0.00407873	0.012972	0.0409509	Mixed
Alistipes_communis.t__SGB2290	P28	-0.147933	0.136882	1006.45	-1.08074	0.280073	0.0131369	0.0410687	Mixed
Alistipes_communis.t__SGB2290	B	-0.526575	0.164098	1093.31	-3.20891	0.00137115	0.0131369	0.0410687	Mixed
Alistipes_communis.t__SGB2290	M3	-0.265251	0.131177	1002.03	-2.02209	0.0434326	0.0131369	0.0410687	Mixed
Blautia_faecis.t__SGB4820	P28	-0.136956	0.10642	1067.68	-1.28693	0.198396	0.0136735	0.0423353	Mixed
Blautia_faecis.t__SGB4820	B	0.126547	0.126339	1175.5	1.00165	0.31672	0.0136735	0.0423353	Mixed
Blautia_faecis.t__SGB4820	M3	0.189289	0.102037	1062.45	1.85511	0.063858	0.0136735	0.0423353	Mixed
Erysipelotrichaceae_bacterium.t__SGB4029	P28	0.429114	0.158661	1004.54	2.7046	0.00695435	0.0140413	0.0430599	Mixed
Erysipelotrichaceae_bacterium.t__SGB4029	B	0.23553	0.189502	1102.23	1.24289	0.214173	0.0140413	0.0430599	Mixed
Erysipelotrichaceae_bacterium.t__SGB4029	M3	0.0181985	0.152078	999.499	0.119665	0.904772	0.0140413	0.0430599	Mixed
Clostridia_bacterium.t__SGB15395	P28	0.319562	0.155167	1022.16	2.05948	0.0397013	0.0142473	0.0432794	Mixed
Clostridia_bacterium.t__SGB15395	B	-0.213498	0.184672	1128.32	-1.15609	0.24789	0.0142473	0.0432794	Mixed
Clostridia_bacterium.t__SGB15395	M3	-0.122621	0.148757	1016.82	-0.824305	0.409959	0.0142473	0.0432794	Mixed
Streptococcus_thermophilus.t__SGB8002	P28	-0.0389076	0.255917	1169.36	-0.152032	0.879188	0.0150365	0.0452501	Mixed
Streptococcus_thermophilus.t__SGB8002	B	0.814345	0.295758	1323.38	2.75342	0.00597838	0.0150365	0.0452501	Mixed
Streptococcus_thermophilus.t__SGB8002	M3	0.410147	0.245525	1171.18	1.67049	0.0950897	0.0150365	0.0452501	Mixed
GGB9667_SGB15164.t__SGB15164	P28	0.473563	0.166655	1031.58	2.84158	0.00457745	0.0153674	0.0458177	Mixed
GGB9667_SGB15164.t__SGB15164	B	0.28909	0.197823	1144.16	1.46136	0.144191	0.0153674	0.0458177	Mixed
GGB9667_SGB15164.t__SGB15164	M3	0.447511	0.159791	1026.18	2.8006	0.0051966	0.0153674	0.0458177	Mixed
Blautia_sp_MSK_21_1.t__SGB4829	P28	0.297972	0.171612	1032.42	1.73631	0.0828069	0.0155756	0.0460124	Mixed
Blautia_sp_MSK_21_1.t__SGB4829	B	0.548225	0.203885	1142.44	2.68889	0.00727334	0.0155756	0.0460124	Mixed
Blautia_sp_MSK_21_1.t__SGB4829	M3	0.458049	0.164537	1027.04	2.78386	0.00547023	0.0155756	0.0460124	Mixed
Ruminococcus_torques.t__SGB4608	P28	-0.175544	0.226969	1060.05	-0.773425	0.439443	0.0162667	0.0476171	Mixed
Ruminococcus_torques.t__SGB4608	B	0.665376	0.267699	1186.6	2.48554	0.0130725	0.0162667	0.0476171	Mixed
Ruminococcus_torques.t__SGB4608	M3	0.291772	0.217685	1055.14	1.34034	0.180423	0.0162667	0.0476171	Mixed
Christensenellaceae_bacterium.t__SGB3813	P28	-0.274919	0.151166	1078.42	-1.81866	0.0692411	0.0168188	0.0487896	Mixed
Christensenellaceae_bacterium.t__SGB3813	B	-0.53775	0.176929	1222.59	-3.03936	0.00242117	0.0168188	0.0487896	Mixed
Christensenellaceae_bacterium.t__SGB3813	M3	-0.312239	0.145017	1075.21	-2.15312	0.0315314	0.0168188	0.0487896	Mixed
Bacteroides_ovatus.t__SGB1871	P28	0.234774	0.15002	997.992	1.56495	0.117912	0.0176944	0.0508715	Mixed
Bacteroides_ovatus.t__SGB1871	B	-0.121752	0.179553	1090.26	-0.678088	0.49786	0.0176944	0.0508715	Mixed
Bacteroides_ovatus.t__SGB1871	M3	0.35506	0.14378	993.244	2.46946	0.0136989	0.0176944	0.0508715	Mixed
Candidatus_Allochristensenella_caecavium.t__SGB63369	P28	-0.081202	0.133525	1118.94	-0.608142	0.543217	0.0197145	0.0561776	Mixed
Candidatus_Allochristensenella_caecavium.t__SGB63369	B	-0.371403	0.155431	1268.76	-2.38951	0.0170161	0.0197145	0.0561776	Mixed
Candidatus_Allochristensenella_caecavium.t__SGB63369	M3	0.0856204	0.128105	1117.7	0.668364	0.504039	0.0197145	0.0561776	Mixed
Ruminococcaceae_bacterium_D5.t__SGB14960	P28	-0.112696	0.145537	1038.27	-0.774348	0.438901	0.0200494	0.0566308	Mixed
Ruminococcaceae_bacterium_D5.t__SGB14960	B	-0.516839	0.172338	1156.83	-2.99898	0.00276673	0.0200494	0.0566308	Mixed
Ruminococcaceae_bacterium_D5.t__SGB14960	M3	-0.0701932	0.13956	1032.93	-0.502962	0.615098	0.0200494	0.0566308	Mixed
GGB9758_SGB15368.t__SGB15368	P28	-0.30696	0.179335	969.693	-1.71166	0.0872791	0.0213497	0.0595456	Mixed
GGB9758_SGB15368.t__SGB15368	B	-0.0498193	0.216128	1043.57	-0.230509	0.817742	0.0213497	0.0595456	Mixed
GGB9758_SGB15368.t__SGB15368	M3	-0.496132	0.171816	966.388	-2.88758	0.00396868	0.0213497	0.0595456	Mixed
Coprococcus_comes.t__SGB4577_group	P28	0.100988	0.133093	1034.95	0.758779	0.448157	0.0214512	0.0595456	Mixed
Coprococcus_comes.t__SGB4577_group	B	0.262612	0.158274	1142	1.65922	0.0973461	0.0214512	0.0595456	Mixed
Coprococcus_comes.t__SGB4577_group	M3	0.37469	0.1276	1029.62	2.93644	0.00339387	0.0214512	0.0595456	Mixed
Veillonella_parvula.t__SGB6939	P28	-0.138681	0.178258	1094.98	-0.777979	0.436749	0.0226429	0.0623162	Mixed
Veillonella_parvula.t__SGB6939	B	-0.0336125	0.208461	1238.18	-0.161241	0.87193	0.0226429	0.0623162	Mixed
Veillonella_parvula.t__SGB6939	M3	-0.476116	0.17101	1092.08	-2.78414	0.00545971	0.0226429	0.0623162	Mixed
Lachnospiraceae_bacterium_WCA3_601_WT_6H.t__SGB4910	P28	0.0905347	0.192794	1054.42	0.469592	0.638744	0.0237124	0.064163	Mixed
Lachnospiraceae_bacterium_WCA3_601_WT_6H.t__SGB4910	B	0.0739879	0.227647	1178.72	0.325012	0.74523	0.0237124	0.064163	Mixed
Lachnospiraceae_bacterium_WCA3_601_WT_6H.t__SGB4910	M3	-0.396326	0.184899	1049.36	-2.14347	0.0323046	0.0237124	0.064163	Mixed
Parasutterella_excrementihominis.t__SGB9262	P28	-0.449287	0.175009	1019.22	-2.56722	0.0103934	0.0236927	0.064163	Mixed
Parasutterella_excrementihominis.t__SGB9262	B	-0.475525	0.208523	1122.47	-2.28044	0.0227684	0.0236927	0.064163	Mixed
Parasutterella_excrementihominis.t__SGB9262	M3	-0.395711	0.16777	1013.96	-2.35866	0.0185301	0.0236927	0.064163	Mixed
Clostridia_bacterium.t__SGB14253	P28	-0.176511	0.154238	1044.58	-1.1444	0.252718	0.0239289	0.0642092	Mixed
Clostridia_bacterium.t__SGB14253	B	-0.559096	0.182795	1159.99	-3.05859	0.00227479	0.0239289	0.0642092	Mixed
Clostridia_bacterium.t__SGB14253	M3	-0.248407	0.147897	1039.24	-1.67959	0.0933376	0.0239289	0.0642092	Mixed
Phocaeicola_vulgatus.t__SGB1814	P28	-0.112956	0.149454	975.426	-0.755793	0.449956	0.0250156	0.0665704	Mixed
Phocaeicola_vulgatus.t__SGB1814	B	0.0669793	0.180131	1048.77	0.371837	0.710089	0.0250156	0.0665704	Mixed
Phocaeicola_vulgatus.t__SGB1814	M3	0.30268	0.143187	972.152	2.11387	0.0347801	0.0250156	0.0665704	Mixed
Eggerthellaceae_unclassified_SGB14322.t__SGB14322_group	P28	0.185315	0.124	1016.71	1.49447	0.135362	0.0270808	0.0714757	Mixed
Eggerthellaceae_unclassified_SGB14322.t__SGB14322_group	B	0.251935	0.147471	1125.54	1.70837	0.0878427	0.0270808	0.0714757	Mixed
Eggerthellaceae_unclassified_SGB14322.t__SGB14322_group	M3	0.357263	0.118882	1011.3	3.00518	0.00271968	0.0270808	0.0714757	Mixed
GGB9709_SGB15238.t__SGB15238	P28	-0.00865287	0.12784	983.617	-0.0676851	0.94605	0.0276652	0.0724243	Mixed
GGB9709_SGB15238.t__SGB15238	B	0.185367	0.153564	1066.33	1.2071	0.227661	0.0276652	0.0724243	Mixed
GGB9709_SGB15238.t__SGB15238	M3	-0.226526	0.1225	979.55	-1.8492	0.0647303	0.0276652	0.0724243	Mixed
Clostridium_sp_AF20_17LB.t__SGB4714	P28	-0.34391	0.189567	1069.01	-1.81419	0.0699293	0.0282504	0.07336	Mixed
Clostridium_sp_AF20_17LB.t__SGB4714	B	-0.639487	0.222586	1206.26	-2.87299	0.00413736	0.0282504	0.07336	Mixed
Clostridium_sp_AF20_17LB.t__SGB4714	M3	-0.261429	0.181841	1064.93	-1.43768	0.150818	0.0282504	0.07336	Mixed
Lachnospiraceae_bacterium.t__SGB4706	P28	-0.164033	0.159464	1055.84	-1.02865	0.303878	0.0286597	0.0738274	Mixed
Lachnospiraceae_bacterium.t__SGB4706	B	-0.56513	0.1881	1182.72	-3.00441	0.00271698	0.0286597	0.0738274	Mixed
Lachnospiraceae_bacterium.t__SGB4706	M3	-0.171334	0.15294	1050.9	-1.12027	0.262854	0.0286597	0.0738274	Mixed
Clostridiales_unclassified_SGB15145.t__SGB15145	P28	-0.129663	0.187045	1088.19	-0.693221	0.488319	0.03051	0.0773561	Mixed
Clostridiales_unclassified_SGB15145.t__SGB15145	B	-0.461018	0.2195	1223.58	-2.10031	0.0359059	0.03051	0.0773561	Mixed
Clostridiales_unclassified_SGB15145.t__SGB15145	M3	0.141982	0.179424	1084.32	0.791319	0.428931	0.03051	0.0773561	Mixed
Ruminococcaceae_unclassified_SGB15234.t__SGB15234	P28	0.13277	0.162982	976.107	0.81463	0.415483	0.0303612	0.0773561	Mixed
Ruminococcaceae_unclassified_SGB15234.t__SGB15234	B	-0.13743	0.196232	1052.47	-0.700347	0.483865	0.0303612	0.0773561	Mixed
Ruminococcaceae_unclassified_SGB15234.t__SGB15234	M3	-0.317298	0.156156	972.571	-2.03193	0.0424321	0.0303612	0.0773561	Mixed
Faecalibacterium_prausnitzii.t__SGB15318_group	P28	0.137062	0.120396	989.683	1.13843	0.255215	0.0314298	0.0784569	Mixed
Faecalibacterium_prausnitzii.t__SGB15318_group	B	0.322059	0.144679	1070.85	2.22603	0.0262194	0.0314298	0.0784569	Mixed
Faecalibacterium_prausnitzii.t__SGB15318_group	M3	0.312606	0.115364	985.721	2.70974	0.00685042	0.0314298	0.0784569	Mixed
GGB9705_SGB15224.t__SGB15224	P28	-0.133319	0.138692	961.569	-0.96126	0.336663	0.0314315	0.0784569	Mixed
GGB9705_SGB15224.t__SGB15224	B	0.0377624	0.167559	1028.54	0.225368	0.821738	0.0314315	0.0784569	Mixed
GGB9705_SGB15224.t__SGB15224	M3	-0.341229	0.132863	958.902	-2.56827	0.0103712	0.0314315	0.0784569	Mixed
Bacilli_unclassified_SGB6571.t__SGB6571	P28	0.357114	0.194314	1079.06	1.83782	0.0663644	0.0322018	0.0797614	Mixed
Bacilli_unclassified_SGB6571.t__SGB6571	B	-0.338383	0.228819	1206.93	-1.47883	0.139448	0.0322018	0.0797614	Mixed
Bacilli_unclassified_SGB6571.t__SGB6571	M3	-0.0469116	0.186377	1074.47	-0.251703	0.801319	0.0322018	0.0797614	Mixed
Alistipes_onderdonkii.t__SGB2303	P28	-0.0869331	0.153246	985	-0.567277	0.570656	0.0330043	0.0810795	Mixed
Alistipes_onderdonkii.t__SGB2303	B	0.145823	0.183782	1072.4	0.793461	0.427685	0.0330043	0.0810795	Mixed
Alistipes_onderdonkii.t__SGB2303	M3	-0.320977	0.146857	980.588	-2.18564	0.0290776	0.0330043	0.0810795	Mixed
Eubacterium_ramulus.t__SGB4959	P28	0.26926	0.165525	1030.64	1.62671	0.104105	0.0334894	0.0810795	Mixed
Eubacterium_ramulus.t__SGB4959	B	0.522849	0.196538	1142.51	2.66029	0.00791664	0.0334894	0.0810795	Mixed
Eubacterium_ramulus.t__SGB4959	M3	0.364929	0.158706	1025.24	2.29941	0.0216821	0.0334894	0.0810795	Mixed
Romboutsia_timonensis.t__SGB6148	P28	-0.105894	0.187783	1116.51	-0.563917	0.572924	0.0334573	0.0810795	Mixed
Romboutsia_timonensis.t__SGB6148	B	0.414617	0.218805	1264.42	1.89492	0.0583314	0.0334573	0.0810795	Mixed
Romboutsia_timonensis.t__SGB6148	M3	0.326466	0.180158	1114.89	1.81211	0.0702387	0.0334573	0.0810795	Mixed
Butyricimonas_virosa.t__SGB1784	P28	-0.185467	0.136592	961.472	-1.35781	0.174842	0.034738	0.0834749	Mixed
Butyricimonas_virosa.t__SGB1784	B	-0.474556	0.164746	1033.44	-2.88054	0.00405197	0.034738	0.0834749	Mixed
Butyricimonas_virosa.t__SGB1784	M3	-0.170119	0.130861	958.356	-1.3	0.193914	0.034738	0.0834749	Mixed
Eggerthellaceae_unclassified_SGB14341.t__SGB14341	P28	0.0653002	0.139104	995.346	0.469436	0.638861	0.0377199	0.0899689	Mixed
Eggerthellaceae_unclassified_SGB14341.t__SGB14341	B	0.0833148	0.166545	1086.81	0.500255	0.616997	0.0377199	0.0899689	Mixed
Eggerthellaceae_unclassified_SGB14341.t__SGB14341	M3	0.351422	0.133315	990.651	2.63602	0.00851956	0.0377199	0.0899689	Mixed
Barnesiella_intestinihominis.t__SGB1965	P28	-0.259235	0.131888	957.2	-1.96557	0.0496366	0.0382782	0.0906293	Mixed
Barnesiella_intestinihominis.t__SGB1965	B	-0.349636	0.159344	1024.26	-2.19421	0.028444	0.0382782	0.0906293	Mixed
Barnesiella_intestinihominis.t__SGB1965	M3	-0.324447	0.126344	954.538	-2.56795	0.0103813	0.0382782	0.0906293	Mixed
Bacteroides_thetaiotaomicron.t__SGB1861	P28	-0.190874	0.138969	968.239	-1.3735	0.169915	0.0402221	0.0939152	Mixed
Bacteroides_thetaiotaomicron.t__SGB1861	B	-0.0120127	0.167462	1042.52	-0.0717339	0.942827	0.0402221	0.0939152	Mixed
Bacteroides_thetaiotaomicron.t__SGB1861	M3	0.186	0.133143	964.902	1.39699	0.162737	0.0402221	0.0939152	Mixed
Roseburia_intestinalis.t__SGB4951	P28	-0.269617	0.249861	1088.51	-1.07907	0.280795	0.0402494	0.0939152	Mixed
Roseburia_intestinalis.t__SGB4951	B	0.0134674	0.292352	1231.58	0.0460656	0.963265	0.0402494	0.0939152	Mixed
Roseburia_intestinalis.t__SGB4951	M3	0.402546	0.239699	1085.43	1.67938	0.0933653	0.0402494	0.0939152	Mixed
Eubacterium_rectale.t__SGB4933_group	P28	-0.160219	0.15948	1090.05	-1.00463	0.315297	0.040544	0.0939222	Mixed
Eubacterium_rectale.t__SGB4933_group	B	-0.334657	0.186347	1236.4	-1.79588	0.0727573	0.040544	0.0939222	Mixed
Eubacterium_rectale.t__SGB4933_group	M3	0.126151	0.152999	1087.4	0.824524	0.409823	0.040544	0.0939222	Mixed
Alistipes_indistinctus.t__SGB2325	P28	-0.255121	0.145066	965.792	-1.75865	0.0789533	0.0418483	0.0959334	Mixed
Alistipes_indistinctus.t__SGB2325	B	-0.400084	0.175068	1035.82	-2.28531	0.0224961	0.0418483	0.0959334	Mixed
Alistipes_indistinctus.t__SGB2325	M3	-0.348602	0.138976	962.838	-2.50837	0.0122925	0.0418483	0.0959334	Mixed
Lachnospiraceae_bacterium.t__SGB4771	P28	-0.110303	0.156268	1044.49	-0.705859	0.480433	0.0420081	0.0959334	Mixed
Lachnospiraceae_bacterium.t__SGB4771	B	-0.445671	0.185122	1161.1	-2.40744	0.0162198	0.0420081	0.0959334	Mixed
Lachnospiraceae_bacterium.t__SGB4771	M3	-0.342611	0.149847	1039.17	-2.28641	0.0224308	0.0420081	0.0959334	Mixed
Intestinimonas_butyriciproducens.t__SGB15126	P28	0.294498	0.194778	1078.02	1.51197	0.130834	0.0442223	0.100279	Mixed
Intestinimonas_butyriciproducens.t__SGB15126	B	0.200679	0.229233	1207.58	0.875435	0.381512	0.0442223	0.100279	Mixed
Intestinimonas_butyriciproducens.t__SGB15126	M3	0.526279	0.186825	1073.53	2.81696	0.0049369	0.0442223	0.100279	Mixed
Butyricimonas_paravirosa.t__SGB1785	P28	-0.317666	0.134511	975.003	-2.36163	0.0183905	0.0453865	0.101489	Mixed
Butyricimonas_paravirosa.t__SGB1785	B	-0.186715	0.161671	1056.54	-1.1549	0.248392	0.0453865	0.101489	Mixed
Butyricimonas_paravirosa.t__SGB1785	M3	-0.0217697	0.128888	971.048	-0.168904	0.865907	0.0453865	0.101489	Mixed
Clostridia_bacterium.t__SGB14250	P28	0.0570245	0.128378	972.74	0.444191	0.657003	0.0451804	0.101489	Mixed
Clostridia_bacterium.t__SGB14250	B	-0.0538611	0.154626	1048.2	-0.348333	0.72766	0.0451804	0.101489	Mixed
Clostridia_bacterium.t__SGB14250	M3	-0.261531	0.122999	969.29	-2.12628	0.0337321	0.0451804	0.101489	Mixed
Ruminococcaceae_unclassified_SGB15265.t__SGB15265_group	P28	-0.0881337	0.171059	987.109	-0.515224	0.606512	0.0459719	0.102089	Mixed
Ruminococcaceae_unclassified_SGB15265.t__SGB15265_group	B	-0.333035	0.205266	1072.62	-1.62245	0.105	0.0459719	0.102089	Mixed
Ruminococcaceae_unclassified_SGB15265.t__SGB15265_group	M3	-0.423643	0.163922	982.826	-2.58442	0.00989739	0.0459719	0.102089	Mixed
Lachnospiraceae_bacterium.t__SGB4669	P28	0.252818	0.117109	964.267	2.15883	0.0311093	0.0477788	0.105375	Mixed
Lachnospiraceae_bacterium.t__SGB4669	B	0.327363	0.141142	1038.28	2.31938	0.0205676	0.0477788	0.105375	Mixed
Lachnospiraceae_bacterium.t__SGB4669	M3	0.148847	0.112199	960.964	1.32664	0.184943	0.0477788	0.105375	Mixed
Clostridia_bacterium.t__SGB13982	P28	-0.11062	0.185472	1051.99	-0.596425	0.55102	0.0503856	0.110369	Mixed
Clostridia_bacterium.t__SGB13982	B	-0.506429	0.219805	1166.56	-2.30399	0.0213981	0.0503856	0.110369	Mixed
Clostridia_bacterium.t__SGB13982	M3	-0.395313	0.177848	1046.69	-2.22276	0.0264448	0.0503856	0.110369	Mixed
Candidatus_Pseudobutyricicoccus_lothianensis.t__SGB14975	P28	0.270174	0.160687	1070.53	1.68137	0.0929831	0.0521715	0.113508	Mixed
Candidatus_Pseudobutyricicoccus_lothianensis.t__SGB14975	B	0.445052	0.188991	1203.02	2.35488	0.0186888	0.0521715	0.113508	Mixed
Candidatus_Pseudobutyricicoccus_lothianensis.t__SGB14975	M3	0.360385	0.154129	1066.11	2.3382	0.0195612	0.0521715	0.113508	Mixed
Blautia_obeum.t__SGB4811_group	P28	0.214042	0.168557	1079.87	1.26985	0.204412	0.0542198	0.116392	Mixed
Blautia_obeum.t__SGB4811_group	B	0.544891	0.19886	1202.64	2.74008	0.00623339	0.0542198	0.116392	Mixed
Blautia_obeum.t__SGB4811_group	M3	0.215598	0.16166	1075.03	1.33366	0.182599	0.0542198	0.116392	Mixed
GGB9636_SGB15107.t__SGB15107	P28	0.0825287	0.145066	966.515	0.568905	0.569553	0.0539256	0.116392	Mixed
GGB9636_SGB15107.t__SGB15107	B	0.0535013	0.174904	1039.28	0.305891	0.759749	0.0539256	0.116392	Mixed
GGB9636_SGB15107.t__SGB15107	M3	-0.253794	0.138981	963.316	-1.82611	0.0681437	0.0539256	0.116392	Mixed
Coprococcus_eutactus.t__SGB5121	P28	0.20549	0.195465	1026.88	1.05129	0.293372	0.0563873	0.119452	Mixed
Coprococcus_eutactus.t__SGB5121	B	0.0354829	0.232146	1138.48	0.152847	0.878546	0.0563873	0.119452	Mixed
Coprococcus_eutactus.t__SGB5121	M3	-0.288348	0.18741	1021.47	-1.5386	0.124213	0.0563873	0.119452	Mixed
Lachnospira_sp_NSJ_43.t__SGB5087	P28	-0.168033	0.201394	1067.89	-0.834351	0.40427	0.0562936	0.119452	Mixed
Lachnospira_sp_NSJ_43.t__SGB5087	B	-0.570593	0.236864	1200.87	-2.40894	0.0161485	0.0562936	0.119452	Mixed
Lachnospira_sp_NSJ_43.t__SGB5087	M3	-0.415174	0.193175	1063.46	-2.14921	0.031843	0.0562936	0.119452	Mixed
Faecalibacterium_prausnitzii.t__SGB15342	P28	-0.0098966	0.108	1037.46	-0.0916348	0.927006	0.0570761	0.120121	Mixed
Faecalibacterium_prausnitzii.t__SGB15342	B	-0.151406	0.12792	1155.45	-1.1836	0.236813	0.0570761	0.120121	Mixed
Faecalibacterium_prausnitzii.t__SGB15342	M3	0.163096	0.103564	1032.11	1.57484	0.1156	0.0570761	0.120121	Mixed
Clostridia_bacterium.t__SGB14861	P28	-0.123469	0.1325	1030.08	-0.931841	0.351637	0.0583037	0.120345	Mixed
Clostridia_bacterium.t__SGB14861	B	0.19501	0.157608	1136.96	1.23731	0.216228	0.0583037	0.120345	Mixed
Clostridia_bacterium.t__SGB14861	M3	-0.206693	0.12703	1024.74	-1.62712	0.104019	0.0583037	0.120345	Mixed
Clostridia_bacterium.t__SGB14937	P28	-0.28048	0.197276	1156.77	-1.42176	0.155364	0.0582435	0.120345	Mixed
Clostridia_bacterium.t__SGB14937	B	-0.595225	0.229017	1303.92	-2.59904	0.00945405	0.0582435	0.120345	Mixed
Clostridia_bacterium.t__SGB14937	M3	-0.363026	0.18927	1156.65	-1.91803	0.0553533	0.0582435	0.120345	Mixed
Faecalibacterium_prausnitzii.t__SGB15332_group	P28	0.126423	0.152605	992.324	0.828437	0.407622	0.0577841	0.120345	Mixed
Faecalibacterium_prausnitzii.t__SGB15332_group	B	0.188289	0.182167	1092.69	1.03361	0.301548	0.0577841	0.120345	Mixed
Faecalibacterium_prausnitzii.t__SGB15332_group	M3	0.389158	0.146278	987.165	2.6604	0.0079313	0.0577841	0.120345	Mixed
Blautia_SGB4831.t__SGB4831_group	P28	0.121301	0.165386	1067.96	0.733444	0.463449	0.0614019	0.125933	Mixed
Blautia_SGB4831.t__SGB4831_group	B	0.528587	0.195203	1191.39	2.70788	0.00686826	0.0614019	0.125933	Mixed
Blautia_SGB4831.t__SGB4831_group	M3	0.19406	0.158616	1063	1.22346	0.221428	0.0614019	0.125933	Mixed
Adlercreutzia_equolifaciens.t__SGB14797_group	P28	0.131636	0.168739	1039.4	0.780114	0.435501	0.0635268	0.129466	Mixed
Adlercreutzia_equolifaciens.t__SGB14797_group	B	0.304628	0.199768	1158.44	1.52491	0.127554	0.0635268	0.129466	Mixed
Adlercreutzia_equolifaciens.t__SGB14797_group	M3	0.415452	0.16181	1034.08	2.56752	0.0103824	0.0635268	0.129466	Mixed
Lawsonibacter_sp_NSJ_51.t__SGB15131	P28	0.317523	0.164396	1083.11	1.93145	0.0536883	0.0663306	0.13433	Mixed
Lawsonibacter_sp_NSJ_51.t__SGB15131	B	-0.14284	0.19292	1219.45	-0.74041	0.459194	0.0663306	0.13433	Mixed
Lawsonibacter_sp_NSJ_51.t__SGB15131	M3	0.235667	0.157699	1079.22	1.49441	0.135361	0.0663306	0.13433	Mixed
Ruminococcaceae_bacterium.t__SGB15356	P28	-0.139317	0.139629	941.939	-0.997764	0.31865	0.0679723	0.135945	Mixed
Ruminococcaceae_bacterium.t__SGB15356	B	-0.341908	0.169454	996.101	-2.01771	0.0438893	0.0679723	0.135945	Mixed
Ruminococcaceae_bacterium.t__SGB15356	M3	-0.323152	0.133739	940.485	-2.41628	0.0158696	0.0679723	0.135945	Mixed
GGB3034_SGB4030.t__SGB4030	P28	0.0647411	0.152889	1099.41	0.423451	0.672049	0.0678671	0.135945	Mixed
GGB3034_SGB4030.t__SGB4030	B	0.182919	0.178896	1240.26	1.02249	0.306748	0.0678671	0.135945	Mixed
GGB3034_SGB4030.t__SGB4030	M3	-0.220097	0.146671	1096.35	-1.50061	0.133744	0.0678671	0.135945	Mixed
Christensenellaceae_bacterium.t__SGB14128	P28	-0.104063	0.1187	970.207	-0.876684	0.380875	0.0704375	0.140005	Mixed
Christensenellaceae_bacterium.t__SGB14128	B	-0.0854136	0.143294	1039.1	-0.596072	0.551257	0.0704375	0.140005	Mixed
Christensenellaceae_bacterium.t__SGB14128	M3	-0.290224	0.113715	967.343	-2.55221	0.010857	0.0704375	0.140005	Mixed
Intestinimonas_gabonensis.t__SGB79840	P28	-0.012593	0.161022	1119.92	-0.0782064	0.937678	0.0722705	0.142767	Mixed
Intestinimonas_gabonensis.t__SGB79840	B	-0.0113516	0.187354	1270.65	-0.060589	0.951696	0.0722705	0.142767	Mixed
Intestinimonas_gabonensis.t__SGB79840	M3	0.321105	0.154486	1118.86	2.07854	0.0378875	0.0722705	0.142767	Mixed
Eubacterium_siraeum.t__SGB4198_group	P28	-0.099792	0.205787	1035.63	-0.484928	0.62783	0.07333	0.143977	Mixed
Eubacterium_siraeum.t__SGB4198_group	B	-0.636627	0.243612	1155.34	-2.61328	0.00908428	0.07333	0.143977	Mixed
Eubacterium_siraeum.t__SGB4198_group	M3	-0.19938	0.197338	1030.29	-1.01035	0.312565	0.07333	0.143977	Mixed
Clostridia_bacterium.t__SGB15373	P28	0.0270379	0.151618	997.07	0.178329	0.858501	0.0771078	0.150477	Mixed
Clostridia_bacterium.t__SGB15373	B	0.352695	0.181286	1092.26	1.94552	0.0519692	0.0771078	0.150477	Mixed
Clostridia_bacterium.t__SGB15373	M3	-0.0996146	0.145319	992.158	-0.68549	0.493195	0.0771078	0.150477	Mixed
GGB9237_SGB14179.t__SGB14179	P28	-0.0621809	0.13512	1042.59	-0.46019	0.645476	0.0796753	0.153625	Mixed
GGB9237_SGB14179.t__SGB14179	B	-0.411848	0.159971	1161.14	-2.57452	0.010161	0.0796753	0.153625	Mixed
GGB9237_SGB14179.t__SGB14179	M3	-0.122677	0.129572	1037.27	-0.946786	0.343968	0.0796753	0.153625	Mixed
Clostridia_bacterium.t__SGB53517	P28	0.000994403	0.177131	1072.84	0.00561395	0.995522	0.0795776	0.153625	Mixed
Clostridia_bacterium.t__SGB53517	B	-0.475631	0.209025	1196.06	-2.27548	0.0230537	0.0795776	0.153625	Mixed
Clostridia_bacterium.t__SGB53517	M3	0.0182581	0.169881	1067.93	0.107476	0.914432	0.0795776	0.153625	Mixed
GGB3571_SGB4778.t__SGB4778	P28	-0.00568206	0.138151	1084.12	-0.0411293	0.9672	0.0857076	0.164273	Mixed
GGB3571_SGB4778.t__SGB4778	B	-0.0164106	0.161953	1223.01	-0.101329	0.919306	0.0857076	0.164273	Mixed
GGB3571_SGB4778.t__SGB4778	M3	0.267666	0.132527	1080.49	2.01972	0.0436593	0.0857076	0.164273	Mixed
Firmicutes_bacterium_AF16_15.t__SGB4993	P28	-0.110117	0.153009	1055.17	-0.719676	0.471884	0.087498	0.166712	Mixed
Firmicutes_bacterium_AF16_15.t__SGB4993	B	-0.144509	0.180752	1178.1	-0.799486	0.42417	0.087498	0.166712	Mixed
Firmicutes_bacterium_AF16_15.t__SGB4993	M3	0.200774	0.14674	1050.07	1.36823	0.171532	0.087498	0.166712	Mixed
Bacteroides_nordii.t__SGB1858	P28	-0.279347	0.133201	981.964	-2.09719	0.0362319	0.0892167	0.167999	Mixed
Bacteroides_nordii.t__SGB1858	B	-0.267715	0.160073	1063.5	-1.67246	0.0947274	0.0892167	0.167999	Mixed
Bacteroides_nordii.t__SGB1858	M3	-0.0831268	0.127633	977.992	-0.651294	0.51501	0.0892167	0.167999	Mixed
Clostridia_bacterium.t__SGB15385	P28	-0.295001	0.147446	987.433	-2.00073	0.0456945	0.0891492	0.167999	Mixed
Clostridia_bacterium.t__SGB15385	B	0.108588	0.176976	1072.19	0.613575	0.539626	0.0891492	0.167999	Mixed
Clostridia_bacterium.t__SGB15385	M3	0.014203	0.141293	983.204	0.100522	0.91995	0.0891492	0.167999	Mixed
Anaerobutyricum_hallii.t__SGB4532	P28	0.218183	0.152603	1060.98	1.42974	0.153086	0.0930143	0.174131	Mixed
Anaerobutyricum_hallii.t__SGB4532	B	0.391842	0.180922	1173.32	2.16581	0.030527	0.0930143	0.174131	Mixed
Anaerobutyricum_hallii.t__SGB4532	M3	0.310665	0.146327	1055.72	2.12309	0.0339787	0.0930143	0.174131	Mixed
Eubacteriaceae_bacterium.t__SGB5043	P28	0.314538	0.156291	1006.42	2.01252	0.0444309	0.0958437	0.178391	Mixed
Eubacteriaceae_bacterium.t__SGB5043	B	0.180271	0.186571	1105.48	0.966232	0.334139	0.0958437	0.178391	Mixed
Eubacteriaceae_bacterium.t__SGB5043	M3	0.350739	0.14981	1001.31	2.34122	0.0194163	0.0958437	0.178391	Mixed
Blautia_sp_AF19_10LB.t__SGB4810	P28	0.0985484	0.156104	1002.86	0.631299	0.527989	0.097405	0.180255	Mixed
Blautia_sp_AF19_10LB.t__SGB4810	B	0.457081	0.186424	1101.07	2.45183	0.0143677	0.097405	0.180255	Mixed
Blautia_sp_AF19_10LB.t__SGB4810	M3	0.218514	0.149629	997.789	1.46037	0.144503	0.097405	0.180255	Mixed
Ruminococcaceae_unclassified_SGB4425.t__SGB4425_group	P28	0.285354	0.183228	1042.89	1.55737	0.119686	0.102735	0.189033	Mixed
Ruminococcaceae_unclassified_SGB4425.t__SGB4425_group	B	-0.129708	0.216786	1163.22	-0.598321	0.549742	0.102735	0.189033	Mixed
Ruminococcaceae_unclassified_SGB4425.t__SGB4425_group	M3	-0.136065	0.17571	1037.61	-0.774376	0.438885	0.102735	0.189033	Mixed
Bifidobacterium_bifidum.t__SGB17256	P28	0.39605	0.175104	979.064	2.26181	0.023928	0.1041	0.190456	Mixed
Bifidobacterium_bifidum.t__SGB17256	B	0.296415	0.210492	1059.92	1.40821	0.159363	0.1041	0.190456	Mixed
Bifidobacterium_bifidum.t__SGB17256	M3	0.145587	0.167783	975.153	0.86771	0.385767	0.1041	0.190456	Mixed
Lachnospiraceae_bacterium.t__SGB4781	P28	0.111904	0.153646	1105.99	0.728326	0.466568	0.109809	0.199766	Mixed
Lachnospiraceae_bacterium.t__SGB4781	B	0.411236	0.179453	1250.2	2.29161	0.0220936	0.109809	0.199766	Mixed
Lachnospiraceae_bacterium.t__SGB4781	M3	0.251562	0.147403	1103.53	1.70663	0.0881724	0.109809	0.199766	Mixed
Clostridia_bacterium.t__SGB3952	P28	-0.0701148	0.180319	1063.83	-0.388838	0.697474	0.113563	0.205082	Mixed
Clostridia_bacterium.t__SGB3952	B	-0.495797	0.212374	1193.67	-2.33454	0.0197326	0.113563	0.205082	Mixed
Clostridia_bacterium.t__SGB3952	M3	-0.0682952	0.172952	1059.14	-0.39488	0.693011	0.113563	0.205082	Mixed
Faecalicatena_fissicatena.t__SGB4871_group	P28	-0.340887	0.183602	1050.44	-1.85666	0.0636395	0.114005	0.205082	Mixed
Faecalicatena_fissicatena.t__SGB4871_group	B	-0.441689	0.216987	1172.84	-2.03556	0.0420193	0.114005	0.205082	Mixed
Faecalicatena_fissicatena.t__SGB4871_group	M3	-0.318246	0.176077	1045.28	-1.80742	0.0709838	0.114005	0.205082	Mixed
Clostridia_bacterium.t__SGB3988	P28	-0.1857	0.154688	1026.81	-1.20048	0.230229	0.127625	0.227045	Mixed
Clostridia_bacterium.t__SGB3988	B	0.180074	0.183905	1135.51	0.979168	0.327705	0.127625	0.227045	Mixed
Clostridia_bacterium.t__SGB3988	M3	0.145633	0.148306	1021.43	0.981982	0.326341	0.127625	0.227045	Mixed
Firmicutes_bacterium.t__SGB4063	P28	-0.0468576	0.152009	1079.08	-0.308256	0.757947	0.127612	0.227045	Mixed
Firmicutes_bacterium.t__SGB4063	B	-0.403784	0.177702	1226.31	-2.27225	0.0232438	0.127612	0.227045	Mixed
Firmicutes_bacterium.t__SGB4063	M3	-0.179757	0.145829	1076.24	-1.23266	0.217973	0.127612	0.227045	Mixed
Bacteroides_stercoris.t__SGB1830_group	P28	-0.0978064	0.138763	926.446	-0.704845	0.481084	0.130128	0.228969	Mixed
Bacteroides_stercoris.t__SGB1830_group	B	0.0869696	0.169173	967.02	0.514088	0.607308	0.130128	0.228969	Mixed
Bacteroides_stercoris.t__SGB1830_group	M3	0.209337	0.132899	926.114	1.57516	0.115561	0.130128	0.228969	Mixed
Lachnospiraceae_unclassified_SGB4882.t__SGB4882	P28	-0.314479	0.200513	1082.23	-1.56837	0.117086	0.129641	0.228969	Mixed
Lachnospiraceae_unclassified_SGB4882.t__SGB4882	B	-0.430824	0.235227	1219.57	-1.83153	0.067266	0.129641	0.228969	Mixed
Lachnospiraceae_unclassified_SGB4882.t__SGB4882	M3	-0.409763	0.192345	1078.42	-2.13035	0.0333687	0.129641	0.228969	Mixed
Bacteroides_eggerthii.t__SGB1829	P28	0.0326379	0.133101	930.812	0.245211	0.806347	0.131972	0.230951	Mixed
Bacteroides_eggerthii.t__SGB1829	B	-0.243156	0.162006	976.323	-1.50091	0.133703	0.131972	0.230951	Mixed
Bacteroides_eggerthii.t__SGB1829	M3	0.12879	0.127479	930.107	1.01028	0.312623	0.131972	0.230951	Mixed
Bacilli_unclassified_SGB6478.t__SGB6478	P28	0.0927769	0.216508	1042.2	0.428515	0.668365	0.133997	0.233227	Mixed
Bacilli_unclassified_SGB6478.t__SGB6478	B	-0.276882	0.256326	1160.84	-1.0802	0.280279	0.133997	0.233227	Mixed
Bacilli_unclassified_SGB6478.t__SGB6478	M3	-0.352898	0.207618	1036.89	-1.69975	0.0894779	0.133997	0.233227	Mixed
GGB9707_SGB15229.t__SGB15229	P28	-0.319448	0.137167	983.997	-2.3289	0.020066	0.136506	0.235053	Mixed
GGB9707_SGB15229.t__SGB15229	B	-0.142544	0.164729	1067.35	-0.86532	0.387058	0.136506	0.235053	Mixed
GGB9707_SGB15229.t__SGB15229	M3	-0.200754	0.131438	979.88	-1.52736	0.126994	0.136506	0.235053	Mixed
Clostridium_leptum.t__SGB14853	P28	0.00218527	0.208371	1108.54	0.0104874	0.991634	0.136261	0.235053	Mixed
Clostridium_leptum.t__SGB14853	B	0.460335	0.243047	1255.59	1.89402	0.0584518	0.136261	0.235053	Mixed
Clostridium_leptum.t__SGB14853	M3	-0.0813422	0.199908	1106.54	-0.406897	0.684162	0.136261	0.235053	Mixed
GGB9730_SGB15291.t__SGB15291	P28	0.174981	0.147512	1011.71	1.18622	0.235815	0.142951	0.244842	Mixed
GGB9730_SGB15291.t__SGB15291	B	0.396445	0.175693	1116.8	2.25647	0.024234	0.142951	0.244842	Mixed
GGB9730_SGB15291.t__SGB15291	M3	0.202921	0.141413	1006.39	1.43496	0.15161	0.142951	0.244842	Mixed
Lachnospiraceae_bacterium.t__SGB4909	P28	-0.261025	0.194421	1081.16	-1.34257	0.179692	0.144278	0.245807	Mixed
Lachnospiraceae_bacterium.t__SGB4909	B	-0.512248	0.228781	1210.58	-2.23903	0.0253352	0.144278	0.245807	Mixed
Lachnospiraceae_bacterium.t__SGB4909	M3	-0.22002	0.186484	1076.71	-1.17983	0.238327	0.144278	0.245807	Mixed
Clostridiaceae_bacterium.t__SGB4721	P28	-0.105181	0.152801	979.773	-0.688354	0.491393	0.149055	0.252609	Mixed
Clostridiaceae_bacterium.t__SGB4721	B	0.24093	0.183743	1059.61	1.31124	0.190062	0.149055	0.252609	Mixed
Clostridiaceae_bacterium.t__SGB4721	M3	0.19604	0.14641	975.942	1.33898	0.180889	0.149055	0.252609	Mixed
Faecalibacterium_prausnitzii.t__SGB15317	P28	-0.279922	0.138759	964.235	-2.01732	0.0439384	0.15166	0.255679	Mixed
Faecalibacterium_prausnitzii.t__SGB15317	B	-0.0639665	0.167471	1034.07	-0.381955	0.702573	0.15166	0.255679	Mixed
Faecalibacterium_prausnitzii.t__SGB15317	M3	-0.0153688	0.132933	961.301	-0.115614	0.907983	0.15166	0.255679	Mixed
GGB9621_SGB15073.t__SGB15073	P28	0.295123	0.177151	1024.61	1.66594	0.0960314	0.152689	0.256019	Mixed
GGB9621_SGB15073.t__SGB15073	B	0.390191	0.21077	1131.43	1.85127	0.0643916	0.152689	0.256019	Mixed
GGB9621_SGB15073.t__SGB15073	M3	0.319804	0.169836	1019.27	1.88302	0.0599827	0.152689	0.256019	Mixed
GGB9818_SGB15459.t__SGB15459	P28	-0.195331	0.156042	1014.66	-1.25178	0.210938	0.153452	0.256019	Mixed
GGB9818_SGB15459.t__SGB15459	B	-0.320391	0.186172	1114.56	-1.72094	0.0855387	0.153452	0.256019	Mixed
GGB9818_SGB15459.t__SGB15459	M3	-0.317008	0.149577	1009.52	-2.11936	0.0343034	0.153452	0.256019	Mixed
Clostridia_bacterium.t__SGB15377	P28	-0.109365	0.150655	982.532	-0.725932	0.468053	0.15435	0.256189	Mixed
Clostridia_bacterium.t__SGB15377	B	-0.25177	0.181117	1062.92	-1.39009	0.164791	0.15435	0.256189	Mixed
Clostridia_bacterium.t__SGB15377	M3	-0.314488	0.144356	978.649	-2.17856	0.029602	0.15435	0.256189	Mixed
Candidatus_Geddesella_stercoravicola.t__SGB14262	P28	0.0109	0.157185	1118.05	0.069345	0.944727	0.156384	0.258234	Mixed
Candidatus_Geddesella_stercoravicola.t__SGB14262	B	-0.385718	0.182951	1268.36	-2.10831	0.0351999	0.156384	0.258234	Mixed
Candidatus_Geddesella_stercoravicola.t__SGB14262	M3	-0.0774661	0.150804	1116.85	-0.513687	0.607573	0.156384	0.258234	Mixed
Lachnospiraceae_bacterium.t__SGB4767	P28	-0.0460184	0.156109	1114.16	-0.294784	0.768214	0.15753	0.258799	Mixed
Lachnospiraceae_bacterium.t__SGB4767	B	-0.382122	0.181949	1261.89	-2.10016	0.0359132	0.15753	0.258799	Mixed
Lachnospiraceae_bacterium.t__SGB4767	M3	-0.0202183	0.14977	1112.44	-0.134996	0.89264	0.15753	0.258799	Mixed
Clostridia_bacterium.t__SGB15374	P28	-0.0767478	0.134534	950.133	-0.570471	0.568493	0.160352	0.260067	Mixed
Clostridia_bacterium.t__SGB15374	B	0.0321654	0.163037	1008.35	0.197289	0.843641	0.160352	0.260067	Mixed
Clostridia_bacterium.t__SGB15374	M3	-0.24796	0.128865	948.297	-1.92418	0.0546306	0.160352	0.260067	Mixed
GGB9787_SGB15410.t__SGB15410	P28	0.124202	0.144495	1087.44	0.859561	0.39022	0.16234	0.260067	Mixed
GGB9787_SGB15410.t__SGB15410	B	0.308534	0.169013	1231.56	1.8255	0.068167	0.16234	0.260067	Mixed
GGB9787_SGB15410.t__SGB15410	M3	-0.0215086	0.138619	1084.45	-0.155163	0.876722	0.16234	0.260067	Mixed
Eubacterium_ventriosum.t__SGB5045	P28	0.336625	0.180843	1024.31	1.86142	0.0629707	0.161366	0.260067	Mixed
Eubacterium_ventriosum.t__SGB5045	B	0.171043	0.215036	1132.81	0.795412	0.426541	0.161366	0.260067	Mixed
Eubacterium_ventriosum.t__SGB5045	M3	0.358005	0.17338	1018.93	2.06485	0.0391893	0.161366	0.260067	Mixed
GGB9627_SGB15081.t__SGB15081	P28	-0.0128356	0.156444	997.174	-0.082046	0.934627	0.160142	0.260067	Mixed
GGB9627_SGB15081.t__SGB15081	B	0.23783	0.18724	1089.51	1.27019	0.20429	0.160142	0.260067	Mixed
GGB9627_SGB15081.t__SGB15081	M3	0.272159	0.149937	992.424	1.81515	0.069802	0.160142	0.260067	Mixed
Ruminococcus_sp_NSJ_71.t__SGB4290	P28	-0.17334	0.250059	1063.06	-0.693197	0.488337	0.162099	0.260067	Mixed
Ruminococcus_sp_NSJ_71.t__SGB4290	B	0.0628862	0.294302	1194.97	0.213679	0.830834	0.162099	0.260067	Mixed
Ruminococcus_sp_NSJ_71.t__SGB4290	M3	-0.460584	0.239849	1058.49	-1.92031	0.0550877	0.162099	0.260067	Mixed
Lentisphaeria_bacterium.t__SGB9203	P28	-0.0765707	0.172388	1024.06	-0.444175	0.65701	0.166198	0.26493	Mixed
Lentisphaeria_bacterium.t__SGB9203	B	-0.417257	0.20565	1123.41	-2.02897	0.0426968	0.166198	0.26493	Mixed
Lentisphaeria_bacterium.t__SGB9203	M3	-0.26223	0.165247	1018.94	-1.5869	0.112845	0.166198	0.26493	Mixed
Blautia_glucerasea.t__SGB4816	P28	0.197815	0.179589	1045	1.10149	0.270939	0.168397	0.265802	Mixed
Blautia_glucerasea.t__SGB4816	B	0.468856	0.212325	1167.07	2.20819	0.0274246	0.168397	0.265802	Mixed
Blautia_glucerasea.t__SGB4816	M3	0.216379	0.172225	1039.78	1.25637	0.209263	0.168397	0.265802	Mixed
Lachnospira_eligens.t__SGB5082_group	P28	-0.281733	0.179017	1099.27	-1.57378	0.115827	0.168194	0.265802	Mixed
Lachnospira_eligens.t__SGB5082_group	B	-0.421912	0.209555	1239.08	-2.01337	0.0442916	0.168194	0.265802	Mixed
Lachnospira_eligens.t__SGB5082_group	M3	-0.268766	0.171735	1096.1	-1.565	0.117871	0.168194	0.265802	Mixed
Lachnospira_pectinoschiza.t__SGB5075_group	P28	0.0277103	0.224528	1075.16	0.123416	0.901801	0.170313	0.267517	Mixed
Lachnospira_pectinoschiza.t__SGB5075_group	B	-0.499768	0.263964	1208.05	-1.89332	0.0585542	0.170313	0.267517	Mixed
Lachnospira_pectinoschiza.t__SGB5075_group	M3	0.0419893	0.215369	1070.85	0.194964	0.845458	0.170313	0.267517	Mixed
GGB6606_SGB9340.t__SGB9340	P28	-0.243916	0.154572	963.176	-1.578	0.114893	0.174425	0.272645	Mixed
GGB6606_SGB9340.t__SGB9340	B	-0.356653	0.186729	1030.32	-1.91	0.0564102	0.174425	0.272645	Mixed
GGB6606_SGB9340.t__SGB9340	M3	-0.140787	0.148076	960.49	-0.950777	0.341957	0.174425	0.272645	Mixed
GGB9677_SGB15180.t__SGB15180	P28	-0.0906375	0.15205	968.414	-0.596103	0.551246	0.175775	0.273428	Mixed
GGB9677_SGB15180.t__SGB15180	B	-0.0951941	0.183072	1045.16	-0.519981	0.603187	0.175775	0.273428	Mixed
GGB9677_SGB15180.t__SGB15180	M3	-0.307377	0.145681	964.867	-2.10993	0.0351217	0.175775	0.273428	Mixed
Paraprevotella_clara.t__SGB1798	P28	-0.176181	0.112181	916.502	-1.57052	0.11664	0.181687	0.281266	Mixed
Paraprevotella_clara.t__SGB1798	B	0.0735429	0.137098	949.628	0.536425	0.591791	0.181687	0.281266	Mixed
Paraprevotella_clara.t__SGB1798	M3	0.0471928	0.107439	916.642	0.439251	0.660583	0.181687	0.281266	Mixed
GGB9524_SGB14924.t__SGB14924	P28	-0.00637676	0.164731	1010.41	-0.0387102	0.969129	0.188503	0.289038	Mixed
GGB9524_SGB14924.t__SGB14924	B	-0.0498116	0.196471	1111.69	-0.253532	0.799904	0.188503	0.289038	Mixed
GGB9524_SGB14924.t__SGB14924	M3	-0.289757	0.157908	1005.21	-1.83497	0.0668055	0.188503	0.289038	Mixed
GGB3293_SGB4348.t__SGB4348	P28	-0.168132	0.232421	1033.74	-0.723395	0.469601	0.188433	0.289038	Mixed
GGB3293_SGB4348.t__SGB4348	B	0.0667186	0.276259	1142.31	0.241508	0.809205	0.188433	0.289038	Mixed
GGB3293_SGB4348.t__SGB4348	M3	-0.410739	0.222835	1028.38	-1.84325	0.0655803	0.188433	0.289038	Mixed
GGB9615_SGB15053.t__SGB15053_group	P28	-0.148398	0.147122	975.358	-1.00867	0.313381	0.193171	0.294792	Mixed
GGB9615_SGB15053.t__SGB15053_group	B	-0.374298	0.176921	1055.33	-2.11562	0.0346105	0.193171	0.294792	Mixed
GGB9615_SGB15053.t__SGB15053_group	M3	-0.116804	0.140968	971.526	-0.828588	0.407541	0.193171	0.294792	Mixed
Clostridiales_bacterium_NSJ_40.t__SGB72336	P28	0.105602	0.125569	1094.77	0.840983	0.400541	0.20628	0.313313	Mixed
Clostridiales_bacterium_NSJ_40.t__SGB72336	B	0.0342024	0.147043	1234.51	0.232602	0.816109	0.20628	0.313313	Mixed
Clostridiales_bacterium_NSJ_40.t__SGB72336	M3	0.241331	0.12046	1091.48	2.0034	0.0453807	0.20628	0.313313	Mixed
Clostridia_bacterium.t__SGB13983	P28	0.0547982	0.193321	1087.02	0.283458	0.77688	0.212281	0.320914	Mixed
Clostridia_bacterium.t__SGB13983	B	-0.397136	0.227527	1214.97	-1.74544	0.0811605	0.212281	0.320914	Mixed
Clostridia_bacterium.t__SGB13983	M3	-0.193599	0.185427	1082.56	-1.04407	0.296685	0.212281	0.320914	Mixed
Candidatus_Avimonas_narfia.t__SGB14941	P28	-0.155105	0.1858	1084.42	-0.834796	0.404016	0.214776	0.321664	Mixed
Candidatus_Avimonas_narfia.t__SGB14941	B	-0.422484	0.218024	1220.69	-1.93779	0.0528792	0.214776	0.321664	Mixed
Candidatus_Avimonas_narfia.t__SGB14941	M3	-0.285834	0.178231	1080.56	-1.60373	0.109067	0.214776	0.321664	Mixed
Clostridia_bacterium.t__SGB15382	P28	0.195621	0.17071	1070.2	1.14593	0.252082	0.213842	0.321664	Mixed
Clostridia_bacterium.t__SGB15382	B	-0.109234	0.200921	1200.85	-0.543664	0.586774	0.213842	0.321664	Mixed
Clostridia_bacterium.t__SGB15382	M3	-0.142935	0.16374	1065.65	-0.872944	0.38289	0.213842	0.321664	Mixed
Clostridium_sp_AF36_4.t__SGB4644	P28	-0.0147331	0.189414	1049.98	-0.0777825	0.938016	0.219724	0.327551	Mixed
Clostridium_sp_AF36_4.t__SGB4644	B	-0.29743	0.223631	1175.22	-1.33001	0.183774	0.219724	0.327551	Mixed
Clostridium_sp_AF36_4.t__SGB4644	M3	-0.310319	0.181658	1044.91	-1.70825	0.0878861	0.219724	0.327551	Mixed
Intestinimonas_massiliensis.t__SGB15127	P28	0.0738004	0.183188	1078.94	0.402866	0.687126	0.227256	0.337218	Mixed
Intestinimonas_massiliensis.t__SGB15127	B	-0.372615	0.215159	1213.7	-1.73181	0.0835617	0.227256	0.337218	Mixed
Intestinimonas_massiliensis.t__SGB15127	M3	-0.131275	0.175721	1074.84	-0.747064	0.455188	0.227256	0.337218	Mixed
Candidatus_Borkfalkia_ceftriaxoniphila.t__SGB14027	P28	-0.223789	0.190874	1078.9	-1.17244	0.241278	0.23309	0.344289	Mixed
Candidatus_Borkfalkia_ceftriaxoniphila.t__SGB14027	B	-0.436863	0.22481	1206.29	-1.94325	0.0522179	0.23309	0.344289	Mixed
Candidatus_Borkfalkia_ceftriaxoniphila.t__SGB14027	M3	-0.263443	0.183076	1074.28	-1.43898	0.150447	0.23309	0.344289	Mixed
Ruminococcaceae_unclassified_SGB4191.t__SGB4191	P28	-0.141732	0.215765	1035.3	-0.656881	0.511403	0.237233	0.348808	Mixed
Ruminococcaceae_unclassified_SGB4191.t__SGB4191	B	-0.188476	0.256008	1148.64	-0.736212	0.461752	0.237233	0.348808	Mixed
Ruminococcaceae_unclassified_SGB4191.t__SGB4191	M3	-0.415777	0.206883	1029.91	-2.00972	0.0447215	0.237233	0.348808	Mixed
Faecalibacterium_SGB15346.t__SGB15346	P28	-0.00468285	0.125745	976.76	-0.0372408	0.970301	0.243681	0.35666	Mixed
Faecalibacterium_SGB15346.t__SGB15346	B	0.0157107	0.151286	1055.25	0.103847	0.91731	0.243681	0.35666	Mixed
Faecalibacterium_SGB15346.t__SGB15346	M3	0.198752	0.120483	973.045	1.64963	0.0993411	0.243681	0.35666	Mixed
Slackia_isoflavoniconvertens.t__SGB14773_group	P28	0.123224	0.107027	945.876	1.15134	0.249884	0.245338	0.357105	Mixed
Slackia_isoflavoniconvertens.t__SGB14773_group	B	0.21409	0.129723	1003.76	1.65037	0.09918	0.245338	0.357105	Mixed
Slackia_isoflavoniconvertens.t__SGB14773_group	M3	0.182353	0.102516	944.079	1.77877	0.0755993	0.245338	0.357105	Mixed
Butyricicoccus_sp_AM29_23AC.t__SGB14991	P28	0.219037	0.151976	970.453	1.44126	0.149833	0.247312	0.357105	Mixed
Butyricicoccus_sp_AM29_23AC.t__SGB14991	B	0.00599061	0.183246	1042.84	0.0326916	0.973927	0.247312	0.357105	Mixed
Butyricicoccus_sp_AM29_23AC.t__SGB14991	M3	0.25306	0.1456	967.277	1.73804	0.0825216	0.247312	0.357105	Mixed
GGB9615_SGB15051.t__SGB15051	P28	-0.0722643	0.159133	1000.37	-0.454112	0.649847	0.247243	0.357105	Mixed
GGB9615_SGB15051.t__SGB15051	B	-0.348395	0.190614	1090.12	-1.82775	0.0678597	0.247243	0.357105	Mixed
GGB9615_SGB15051.t__SGB15051	M3	-0.006418	0.152508	995.774	-0.0420831	0.966441	0.247243	0.357105	Mixed
Clostridia_bacterium.t__SGB5180	P28	-0.20741	0.147028	1144.22	-1.41068	0.158609	0.25	0.357778	Mixed
Clostridia_bacterium.t__SGB5180	B	0.0845299	0.170588	1295.91	0.49552	0.620317	0.25	0.357778	Mixed
Clostridia_bacterium.t__SGB5180	M3	-0.173291	0.141061	1144.33	-1.22849	0.219517	0.25	0.357778	Mixed
Clostridium_sp_AM49_4BH.t__SGB4652	P28	-0.164404	0.217086	1068.72	-0.757323	0.449023	0.24966	0.357778	Mixed
Clostridium_sp_AM49_4BH.t__SGB4652	B	-0.304421	0.25489	1206.11	-1.19432	0.232587	0.24966	0.357778	Mixed
Clostridium_sp_AM49_4BH.t__SGB4652	M3	-0.408795	0.208238	1064.65	-1.96311	0.0498932	0.24966	0.357778	Mixed
Lachnospiraceae_bacterium.t__SGB4953	P28	-0.173118	0.178346	1083.44	-0.970686	0.331921	0.253139	0.360667	Mixed
Lachnospiraceae_bacterium.t__SGB4953	B	0.276922	0.208638	1227.96	1.32728	0.184662	0.253139	0.360667	Mixed
Lachnospiraceae_bacterium.t__SGB4953	M3	0.00841253	0.171094	1080.4	0.0491692	0.960794	0.253139	0.360667	Mixed
GGB9712_SGB15244.t__SGB15244	P28	-0.0240526	0.125859	940.022	-0.191107	0.848483	0.260255	0.369172	Mixed
GGB9712_SGB15244.t__SGB15244	B	0.0673976	0.152846	992.19	0.44095	0.659345	0.260255	0.369172	Mixed
GGB9712_SGB15244.t__SGB15244	M3	0.192633	0.120549	938.747	1.59797	0.110386	0.260255	0.369172	Mixed
Parabacteroides_merdae.t__SGB1949	P28	-0.120405	0.134658	937.249	-0.89416	0.371466	0.267251	0.376184	Mixed
Parabacteroides_merdae.t__SGB1949	B	0.128645	0.163706	986.244	0.785831	0.432155	0.267251	0.376184	Mixed
Parabacteroides_merdae.t__SGB1949	M3	0.127453	0.128972	936.249	0.988222	0.323299	0.267251	0.376184	Mixed
Lachnospiraceae_bacterium.t__SGB4780	P28	-0.055761	0.151014	1083.45	-0.369244	0.712018	0.267535	0.376184	Mixed
Lachnospiraceae_bacterium.t__SGB4780	B	-0.238335	0.177427	1216.58	-1.34329	0.17943	0.267535	0.376184	Mixed
Lachnospiraceae_bacterium.t__SGB4780	M3	0.0888389	0.144856	1079.3	0.613289	0.539814	0.267535	0.376184	Mixed
Anaeromassilibacillus_sp_An250.t__SGB14894	P28	0.242792	0.179359	1066.94	1.35366	0.17613	0.269928	0.377899	Mixed
Anaeromassilibacillus_sp_An250.t__SGB14894	B	-0.19031	0.211002	1199.39	-0.901934	0.367273	0.269928	0.377899	Mixed
Anaeromassilibacillus_sp_An250.t__SGB14894	M3	0.0760354	0.172039	1062.46	0.441967	0.658603	0.269928	0.377899	Mixed
Coprobacter_secundus.t__SGB1962	P28	-0.257374	0.147777	1021.39	-1.74163	0.0818734	0.275917	0.382809	Mixed
Coprobacter_secundus.t__SGB1962	B	0.0572463	0.175945	1126.54	0.325364	0.744966	0.275917	0.382809	Mixed
Coprobacter_secundus.t__SGB1962	M3	-0.102162	0.14167	1016.08	-0.721129	0.470996	0.275917	0.382809	Mixed
GGB3510_SGB4687.t__SGB4687	P28	0.271403	0.158726	1113.34	1.70988	0.087566	0.27751	0.382809	Mixed
GGB3510_SGB4687.t__SGB4687	B	0.232237	0.185161	1259.06	1.25424	0.209987	0.27751	0.382809	Mixed
GGB3510_SGB4687.t__SGB4687	M3	0.0835701	0.152279	1111.3	0.548795	0.583256	0.27751	0.382809	Mixed
Clostridium_sp_AM33_3.t__SGB4711	P28	-0.0772364	0.162186	1058.27	-0.476222	0.634015	0.27819	0.382809	Mixed
Clostridium_sp_AM33_3.t__SGB4711	B	-0.371811	0.191099	1187.81	-1.94565	0.0519329	0.27819	0.382809	Mixed
Clostridium_sp_AM33_3.t__SGB4711	M3	-0.0984731	0.155557	1053.49	-0.633034	0.526849	0.27819	0.382809	Mixed
GGB9646_SGB15123.t__SGB15123	P28	0.084751	0.154451	1108.04	0.548726	0.583304	0.278118	0.382809	Mixed
GGB9646_SGB15123.t__SGB15123	B	0.247717	0.180038	1256.82	1.37591	0.169094	0.278118	0.382809	Mixed
GGB9646_SGB15123.t__SGB15123	M3	0.26164	0.148179	1106.26	1.76571	0.0777209	0.278118	0.382809	Mixed
Alistipes_finegoldii.t__SGB2301	P28	-0.137648	0.16206	993.782	-0.849365	0.395883	0.280711	0.384633	Mixed
Alistipes_finegoldii.t__SGB2301	B	-0.352587	0.194238	1082.26	-1.81523	0.0697647	0.280711	0.384633	Mixed
Alistipes_finegoldii.t__SGB2301	M3	-0.225444	0.155308	989.28	-1.45159	0.146931	0.280711	0.384633	Mixed
GGB9635_SGB15106.t__SGB15106	P28	-0.16883	0.159448	942.496	-1.05884	0.289943	0.282647	0.385646	Mixed
GGB9635_SGB15106.t__SGB15106	B	-0.335241	0.193462	997.325	-1.73285	0.0834315	0.282647	0.385646	Mixed
GGB9635_SGB15106.t__SGB15106	M3	-0.234301	0.152723	940.981	-1.53416	0.125327	0.282647	0.385646	Mixed
GGB9618_SGB15065.t__SGB15065	P28	-0.0267726	0.13135	990.822	-0.203827	0.838531	0.291686	0.39347	Mixed
GGB9618_SGB15065.t__SGB15065	B	-0.296093	0.157577	1076.8	-1.87903	0.0605103	0.291686	0.39347	Mixed
GGB9618_SGB15065.t__SGB15065	M3	-0.110725	0.125871	986.498	-0.879671	0.379252	0.291686	0.39347	Mixed
GGB9642_SGB15119.t__SGB15119	P28	-0.00249896	0.114813	951.593	-0.0217654	0.98264	0.29327	0.39347	Mixed
GGB9642_SGB15119.t__SGB15119	B	0.120719	0.138937	1014.09	0.868875	0.385121	0.29327	0.39347	Mixed
GGB9642_SGB15119.t__SGB15119	M3	0.178329	0.109981	949.361	1.62146	0.105251	0.29327	0.39347	Mixed
GGB9694_SGB15203.t__SGB15203	P28	0.292402	0.17752	1072.82	1.64715	0.0998199	0.29235	0.39347	Mixed
GGB9694_SGB15203.t__SGB15203	B	-0.0171302	0.208772	1205.16	-0.0820522	0.934619	0.29235	0.39347	Mixed
GGB9694_SGB15203.t__SGB15203	M3	0.0111239	0.170276	1068.43	0.0653289	0.947924	0.29235	0.39347	Mixed
Ruminococcaceae_bacterium.t__SGB14899	P28	0.0392061	0.134674	977.491	0.291119	0.771022	0.291302	0.39347	Mixed
Ruminococcaceae_bacterium.t__SGB14899	B	-0.228543	0.16217	1053.38	-1.40928	0.159047	0.291302	0.39347	Mixed
Ruminococcaceae_bacterium.t__SGB14899	M3	0.0742986	0.129032	973.992	0.575814	0.564874	0.291302	0.39347	Mixed
Alistipes_inops.t__SGB2286	P28	0.188161	0.155515	946.755	1.20992	0.226612	0.300066	0.400918	Mixed
Alistipes_inops.t__SGB2286	B	-0.189494	0.188405	1006.03	-1.00578	0.314764	0.300066	0.400918	Mixed
Alistipes_inops.t__SGB2286	M3	0.0910103	0.148964	944.831	0.610956	0.541376	0.300066	0.400918	Mixed
Alistipes_sp_AF17_16.t__SGB2326	P28	-0.131564	0.124222	927.567	-1.05911	0.289827	0.319988	0.425769	Mixed
Alistipes_sp_AF17_16.t__SGB2326	B	0.0557269	0.151315	970.776	0.368283	0.712742	0.319988	0.425769	Mixed
Alistipes_sp_AF17_16.t__SGB2326	M3	-0.173664	0.118974	927.043	-1.45969	0.144714	0.319988	0.425769	Mixed
Monoglobus_pectinilyticus.t__SGB4166	P28	0.103861	0.152862	1022.12	0.67944	0.497013	0.323695	0.42893	Mixed
Monoglobus_pectinilyticus.t__SGB4166	B	0.0958236	0.182064	1126.2	0.52632	0.59877	0.323695	0.42893	Mixed
Monoglobus_pectinilyticus.t__SGB4166	M3	0.266458	0.146542	1016.84	1.8183	0.0693119	0.323695	0.42893	Mixed
Phocaeicola_dorei.t__SGB1815	P28	0.0319737	0.153724	941.269	0.207994	0.835279	0.326293	0.4306	Mixed
Phocaeicola_dorei.t__SGB1815	B	0.106972	0.186454	997.18	0.573717	0.566289	0.326293	0.4306	Mixed
Phocaeicola_dorei.t__SGB1815	M3	-0.169238	0.147243	939.661	-1.14938	0.250691	0.326293	0.4306	Mixed
Clostridiales_bacterium.t__SGB15143	P28	0.142844	0.177667	1037.99	0.803998	0.421582	0.334485	0.439609	Mixed
Clostridiales_bacterium.t__SGB15143	B	-0.00482735	0.21055	1154.38	-0.0229273	0.981712	0.334485	0.439609	Mixed
Clostridiales_bacterium.t__SGB15143	M3	0.280225	0.170363	1032.62	1.64487	0.100301	0.334485	0.439609	Mixed
Ruminococcaceae_bacterium.t__SGB14906	P28	0.0591773	0.16248	1041.6	0.364214	0.715772	0.336762	0.440802	Mixed
Ruminococcaceae_bacterium.t__SGB14906	B	-0.305136	0.192392	1159.86	-1.58601	0.113009	0.336762	0.440802	Mixed
Ruminococcaceae_bacterium.t__SGB14906	M3	-0.0664387	0.155807	1036.27	-0.426417	0.669892	0.336762	0.440802	Mixed
Clostridia_bacterium.t__SGB4394	P28	-0.110542	0.161948	1051.79	-0.682573	0.495027	0.340254	0.44357	Mixed
Clostridia_bacterium.t__SGB4394	B	-0.334175	0.191671	1170.05	-1.74348	0.0815118	0.340254	0.44357	Mixed
Clostridia_bacterium.t__SGB4394	M3	-0.0587305	0.155301	1046.53	-0.378173	0.705379	0.340254	0.44357	Mixed
Sutterella_wadsworthensis.t__SGB9283	P28	-0.150637	0.155513	951.41	-0.968644	0.332969	0.342592	0.444817	Mixed
Sutterella_wadsworthensis.t__SGB9283	B	-0.317793	0.188492	1009.08	-1.68597	0.0921105	0.342592	0.444817	Mixed
Sutterella_wadsworthensis.t__SGB9283	M3	-0.0829822	0.148959	949.621	-0.55708	0.577604	0.342592	0.444817	Mixed
Clostridiaceae_unclassified_SGB4769.t__SGB4769	P28	-0.0304321	0.156326	1068.86	-0.19467	0.845688	0.344221	0.445137	Mixed
Clostridiaceae_unclassified_SGB4769.t__SGB4769	B	-0.326066	0.183817	1202.3	-1.77386	0.0763395	0.344221	0.445137	Mixed
Clostridiaceae_unclassified_SGB4769.t__SGB4769	M3	-0.0960071	0.149948	1064.49	-0.640268	0.522136	0.344221	0.445137	Mixed
Bacteroides_uniformis.t__SGB1836_group	P28	-0.0880083	0.11935	1028.7	-0.737398	0.461048	0.352308	0.449118	Mixed
Bacteroides_uniformis.t__SGB1836_group	B	-0.0354938	0.142536	1124.47	-0.249016	0.803394	0.352308	0.449118	Mixed
Bacteroides_uniformis.t__SGB1836_group	M3	0.106498	0.114399	1023.73	0.930935	0.352107	0.352308	0.449118	Mixed
GGB9501_SGB14898.t__SGB14898	P28	-0.113879	0.138551	977.271	-0.821925	0.41132	0.349714	0.449118	Mixed
GGB9501_SGB14898.t__SGB14898	B	-0.280731	0.166735	1055	-1.68369	0.0925369	0.349714	0.449118	Mixed
GGB9501_SGB14898.t__SGB14898	M3	-0.0546258	0.132751	973.618	-0.41149	0.680804	0.349714	0.449118	Mixed
GGB9619_SGB15067.t__SGB15067	P28	0.160723	0.189982	1050.17	0.845988	0.397752	0.352878	0.449118	Mixed
GGB9619_SGB15067.t__SGB15067	B	-0.115985	0.224113	1177.69	-0.517526	0.604886	0.352878	0.449118	Mixed
GGB9619_SGB15067.t__SGB15067	M3	0.234999	0.182209	1045.19	1.28972	0.197433	0.352878	0.449118	Mixed
GGB9640_SGB15115.t__SGB15115	P28	0.210562	0.122795	994.008	1.71475	0.086702	0.350753	0.449118	Mixed
GGB9640_SGB15115.t__SGB15115	B	0.00798016	0.147263	1080.75	0.0541899	0.956794	0.350753	0.449118	Mixed
GGB9640_SGB15115.t__SGB15115	M3	0.0568456	0.117675	989.623	0.483075	0.629149	0.350753	0.449118	Mixed
Veillonella_dispar.t__SGB6952	P28	0.192292	0.166736	1104.98	1.15328	0.249047	0.356965	0.452531	Mixed
Veillonella_dispar.t__SGB6952	B	-0.134778	0.194419	1253.63	-0.693238	0.488288	0.356965	0.452531	Mixed
Veillonella_dispar.t__SGB6952	M3	-0.0491818	0.159965	1103.08	-0.307454	0.758556	0.356965	0.452531	Mixed
Ruminococcaceae_bacterium.t__SGB15272	P28	0.00671799	0.168322	1084.16	0.0399115	0.968171	0.359111	0.453466	Mixed
Ruminococcaceae_bacterium.t__SGB15272	B	0.264242	0.197715	1217.8	1.33648	0.181642	0.359111	0.453466	Mixed
Ruminococcaceae_bacterium.t__SGB15272	M3	-0.0773627	0.16146	1080.06	-0.479144	0.631933	0.359111	0.453466	Mixed
Alistipes_senegalensis.t__SGB2296	P28	-0.0251657	0.12909	938.753	-0.194947	0.845477	0.363333	0.45645	Mixed
Alistipes_senegalensis.t__SGB2296	B	-0.265933	0.156899	988.458	-1.69493	0.0904029	0.363333	0.45645	Mixed
Alistipes_senegalensis.t__SGB2296	M3	-0.0264093	0.123641	937.691	-0.213597	0.830908	0.363333	0.45645	Mixed
Clostridium_fessum.t__SGB4705	P28	-0.0963335	0.12834	1012.04	-0.75061	0.453062	0.36431	0.45645	Mixed
Clostridium_fessum.t__SGB4705	B	-0.271038	0.15312	1112.2	-1.7701	0.0769844	0.36431	0.45645	Mixed
Clostridium_fessum.t__SGB4705	M3	-0.117616	0.123023	1006.89	-0.956053	0.339275	0.36431	0.45645	Mixed
Bacteroides_xylanisolvens.t__SGB1867	P28	-0.253602	0.168716	976.474	-1.50313	0.133128	0.366756	0.457734	Mixed
Bacteroides_xylanisolvens.t__SGB1867	B	-0.0486992	0.203047	1054.09	-0.239842	0.8105	0.366756	0.457734	Mixed
Bacteroides_xylanisolvens.t__SGB1867	M3	0.00394289	0.161653	972.832	0.0243911	0.980546	0.366756	0.457734	Mixed
Lacrimispora_celerecrescens.t__SGB4868	P28	0.0872137	0.166706	1019.38	0.523158	0.600978	0.37031	0.460385	Mixed
Lacrimispora_celerecrescens.t__SGB4868	B	0.187811	0.198817	1119.95	0.944643	0.345045	0.37031	0.460385	Mixed
Lacrimispora_celerecrescens.t__SGB4868	M3	0.271651	0.159802	1014.21	1.69992	0.0894522	0.37031	0.460385	Mixed
GGB9633_SGB15091.t__SGB15091	P28	-0.116551	0.161137	950.596	-0.723303	0.469672	0.376377	0.466128	Mixed
GGB9633_SGB15091.t__SGB15091	B	-0.0765131	0.195151	1010.73	-0.392072	0.695088	0.376377	0.466128	Mixed
GGB9633_SGB15091.t__SGB15091	M3	-0.26429	0.154351	948.583	-1.71227	0.087174	0.376377	0.466128	Mixed
Ruminococcus_lactaris.t__SGB4557	P28	0.285802	0.203975	1039.68	1.40116	0.161465	0.387548	0.478125	Mixed
Ruminococcus_lactaris.t__SGB4557	B	0.340152	0.241913	1153.72	1.40609	0.159966	0.387548	0.478125	Mixed
Ruminococcus_lactaris.t__SGB4557	M3	0.167645	0.195583	1034.31	0.857157	0.391557	0.387548	0.478125	Mixed
Bacteroides_cellulosilyticus.t__SGB1844	P28	-0.0169387	0.140674	934.827	-0.120411	0.904184	0.389161	0.478282	Mixed
Bacteroides_cellulosilyticus.t__SGB1844	B	-0.161417	0.171012	984.029	-0.943893	0.345456	0.389161	0.478282	Mixed
Bacteroides_cellulosilyticus.t__SGB1844	M3	0.110658	0.134735	933.814	0.821299	0.411686	0.389161	0.478282	Mixed
GGB9537_SGB14940.t__SGB14940	P28	-0.217304	0.147389	1103.3	-1.47435	0.140672	0.391943	0.479869	Mixed
GGB9537_SGB14940.t__SGB14940	B	-0.235065	0.172384	1244.51	-1.36361	0.172937	0.391943	0.479869	Mixed
GGB9537_SGB14940.t__SGB14940	M3	-0.149103	0.141397	1100.39	-1.05451	0.291883	0.391943	0.479869	Mixed
GGB3256_SGB4303.t__SGB4303	P28	0.237079	0.215769	1016.52	1.09876	0.272131	0.417324	0.509009	Mixed
GGB3256_SGB4303.t__SGB4303	B	-0.0865619	0.257238	1118.38	-0.336505	0.736553	0.417324	0.509009	Mixed
GGB3256_SGB4303.t__SGB4303	M3	-0.100033	0.206837	1011.3	-0.483633	0.628751	0.417324	0.509009	Mixed
Clostridia_unclassified_SGB4447.t__SGB4447	P28	0.183476	0.16527	1063.42	1.11015	0.267183	0.425333	0.515949	Mixed
Clostridia_unclassified_SGB4447.t__SGB4447	B	-0.0773173	0.194847	1190.59	-0.396811	0.691578	0.425333	0.515949	Mixed
Clostridia_unclassified_SGB4447.t__SGB4447	M3	-0.0656396	0.158512	1058.58	-0.414098	0.678886	0.425333	0.515949	Mixed
Clostridiales_bacterium_KLE1615.t__SGB5090_group	P28	0.143735	0.137345	1068.35	1.04652	0.295555	0.426219	0.515949	Mixed
Clostridiales_bacterium_KLE1615.t__SGB5090_group	B	-0.128506	0.162144	1191.1	-0.792543	0.428202	0.426219	0.515949	Mixed
Clostridiales_bacterium_KLE1615.t__SGB5090_group	M3	0.0793146	0.131721	1063.37	0.602139	0.54721	0.426219	0.515949	Mixed
Clostridia_bacterium.t__SGB15413	P28	-0.0744957	0.129764	1041.97	-0.574085	0.566034	0.428658	0.516958	Mixed
Clostridia_bacterium.t__SGB15413	B	0.0284217	0.153781	1157.88	0.184819	0.853403	0.428658	0.516958	Mixed
Clostridia_bacterium.t__SGB15413	M3	-0.174409	0.12443	1036.63	-1.40166	0.161315	0.428658	0.516958	Mixed
GGB9614_SGB15049.t__SGB15049	P28	-0.158919	0.199157	1077.51	-0.797961	0.425069	0.440051	0.528718	Mixed
GGB9614_SGB15049.t__SGB15049	B	-0.079865	0.233812	1213.7	-0.341578	0.732727	0.440051	0.528718	Mixed
GGB9614_SGB15049.t__SGB15049	M3	0.136247	0.191041	1073.5	0.713181	0.475889	0.440051	0.528718	Mixed
Clostridia_bacterium.t__SGB14932	P28	-0.0953791	0.185608	1091.6	-0.513874	0.607444	0.449182	0.537683	Mixed
Clostridia_bacterium.t__SGB14932	B	-0.0946262	0.217788	1226.7	-0.434488	0.66401	0.449182	0.537683	Mixed
Clostridia_bacterium.t__SGB14932	M3	-0.279352	0.178047	1087.78	-1.56898	0.116943	0.449182	0.537683	Mixed
Christensenellaceae_bacterium.t__SGB14127	P28	-0.136584	0.17871	1140.61	-0.76428	0.444858	0.457123	0.545161	Mixed
Christensenellaceae_bacterium.t__SGB14127	B	-0.0822052	0.206522	1302.77	-0.398046	0.690661	0.457123	0.545161	Mixed
Christensenellaceae_bacterium.t__SGB14127	M3	-0.270441	0.171453	1142.53	-1.57735	0.114992	0.457123	0.545161	Mixed
Methanobrevibacter_smithii.t__SGB714_group	P28	-0.132486	0.136924	964.297	-0.967584	0.333495	0.471509	0.560244	Mixed
Methanobrevibacter_smithii.t__SGB714_group	B	-0.141586	0.16505	1037.86	-0.857841	0.391179	0.471509	0.560244	Mixed
Methanobrevibacter_smithii.t__SGB714_group	M3	-0.205681	0.131182	961.033	-1.5679	0.117233	0.471509	0.560244	Mixed
Clostridiaceae_bacterium.t__SGB4770	P28	-0.0143528	0.168597	1095.92	-0.0851308	0.932173	0.489525	0.579511	Mixed
Clostridiaceae_bacterium.t__SGB4770	B	-0.144329	0.196766	1244.17	-0.733509	0.463386	0.489525	0.579511	Mixed
Clostridiaceae_bacterium.t__SGB4770	M3	-0.218251	0.161748	1093.68	-1.34933	0.177511	0.489525	0.579511	Mixed
Roseburia_faecis.t__SGB4925	P28	0.343357	0.239742	1094.14	1.43219	0.152374	0.501933	0.592024	Mixed
Roseburia_faecis.t__SGB4925	B	0.0100348	0.281219	1229.59	0.0356831	0.971541	0.501933	0.592024	Mixed
Roseburia_faecis.t__SGB4925	M3	0.191912	0.229978	1090.41	0.83448	0.404193	0.501933	0.592024	Mixed
Candidatus_Saccharibacteria_unclassified_SGB19850.t__SGB19850_group	P28	0.00494791	0.139593	1081.03	0.0354453	0.971731	0.504034	0.592332	Mixed
Candidatus_Saccharibacteria_unclassified_SGB19850.t__SGB19850_group	B	0.238059	0.163872	1216.78	1.45271	0.146562	0.504034	0.592332	Mixed
Candidatus_Saccharibacteria_unclassified_SGB19850.t__SGB19850_group	M3	0.0637875	0.133904	1077.05	0.476366	0.63391	0.504034	0.592332	Mixed
GGB9347_SGB14313.t__SGB14313	P28	0.0323503	0.1806	1007.7	0.179127	0.857874	0.511639	0.599082	Mixed
GGB9347_SGB14313.t__SGB14313	B	-0.278729	0.215492	1107.96	-1.29346	0.196123	0.511639	0.599082	Mixed
GGB9347_SGB14313.t__SGB14313	M3	-0.12697	0.173116	1002.54	-0.733437	0.463463	0.511639	0.599082	Mixed
GGB3537_SGB4727.t__SGB4727	P28	-0.158888	0.16374	1055.17	-0.970367	0.332086	0.514236	0.599942	Mixed
GGB3537_SGB4727.t__SGB4727	B	-0.00978967	0.192884	1185.85	-0.0507541	0.95953	0.514236	0.599942	Mixed
GGB3537_SGB4727.t__SGB4727	M3	0.0750906	0.15705	1050.42	0.478133	0.632655	0.514236	0.599942	Mixed
Anaerobutyricum_hallii.t__SGB4537	P28	-0.0196835	0.170011	1028.95	-0.115778	0.907851	0.537812	0.624423	Mixed
Anaerobutyricum_hallii.t__SGB4537	B	0.26339	0.201906	1140.44	1.30452	0.19232	0.537812	0.624423	Mixed
Anaerobutyricum_hallii.t__SGB4537	M3	0.109175	0.163006	1023.54	0.669765	0.503159	0.537812	0.624423	Mixed
Hydrogeniiclostidium_mannosilyticum.t__SGB14890	P28	-0.0320415	0.144843	1064.44	-0.221216	0.824967	0.539098	0.624423	Mixed
Hydrogeniiclostidium_mannosilyticum.t__SGB14890	B	0.197518	0.171076	1186.5	1.15456	0.248503	0.539098	0.624423	Mixed
Hydrogeniiclostidium_mannosilyticum.t__SGB14890	M3	0.10885	0.138909	1059.4	0.783602	0.433449	0.539098	0.624423	Mixed
GGB1420_SGB1957.t__SGB1957	P28	-0.108476	0.118356	932.912	-0.916526	0.359628	0.546593	0.627378	Mixed
GGB1420_SGB1957.t__SGB1957	B	-0.0468167	0.14391	981.531	-0.325319	0.745009	0.546593	0.627378	Mixed
GGB1420_SGB1957.t__SGB1957	M3	0.0462842	0.113358	931.952	0.408299	0.683148	0.546593	0.627378	Mixed
Lachnospiraceae_bacterium.t__SGB4648	P28	-0.0807984	0.194145	1037.59	-0.416176	0.677367	0.547494	0.627378	Mixed
Lachnospiraceae_bacterium.t__SGB4648	B	0.00511784	0.229986	1155.14	0.0222528	0.98225	0.547494	0.627378	Mixed
Lachnospiraceae_bacterium.t__SGB4648	M3	-0.238764	0.186167	1032.23	-1.28253	0.199946	0.547494	0.627378	Mixed
GGB9705_SGB15225.t__SGB15225	P28	0.0456117	0.151522	998.315	0.301024	0.763459	0.545278	0.627378	Mixed
GGB9705_SGB15225.t__SGB15225	B	-0.0816832	0.181469	1088.65	-0.450122	0.652712	0.545278	0.627378	Mixed
GGB9705_SGB15225.t__SGB15225	M3	-0.154041	0.145214	993.684	-1.06078	0.289046	0.545278	0.627378	Mixed
Lachnospiraceae_bacterium_BX3.t__SGB4651	P28	-0.0724282	0.160984	1068.66	-0.44991	0.652866	0.549663	0.627629	Mixed
Lachnospiraceae_bacterium_BX3.t__SGB4651	B	0.112552	0.189743	1195.73	0.593183	0.553171	0.549663	0.627629	Mixed
Lachnospiraceae_bacterium_BX3.t__SGB4651	M3	0.139118	0.154402	1063.88	0.901011	0.367786	0.549663	0.627629	Mixed
Anaerosacchariphilus_sp_NSJ_68.t__SGB4772	P28	0.160244	0.127303	1128.51	1.25876	0.208377	0.575064	0.654313	Mixed
Anaerosacchariphilus_sp_NSJ_68.t__SGB4772	B	0.14661	0.148057	1278.28	0.990228	0.32225	0.575064	0.654313	Mixed
Anaerosacchariphilus_sp_NSJ_68.t__SGB4772	M3	0.126979	0.122136	1127.63	1.03966	0.298721	0.575064	0.654313	Mixed
Dorea_longicatena.t__SGB4581	P28	0.0442047	0.158731	1009.73	0.278489	0.780694	0.582612	0.660568	Mixed
Dorea_longicatena.t__SGB4581	B	0.200934	0.189515	1108.04	1.06025	0.289261	0.582612	0.660568	Mixed
Dorea_longicatena.t__SGB4581	M3	0.178481	0.152148	1004.66	1.17308	0.241043	0.582612	0.660568	Mixed
Coprococcus_eutactus.t__SGB5117	P28	-0.120449	0.189035	985.377	-0.637178	0.524157	0.595278	0.67256	Mixed
Coprococcus_eutactus.t__SGB5117	B	0.215652	0.226622	1073.77	0.951594	0.341517	0.595278	0.67256	Mixed
Coprococcus_eutactus.t__SGB5117	M3	-0.0324907	0.181157	980.896	-0.179351	0.857699	0.595278	0.67256	Mixed
Clostridium_sp_NSJ_42.t__SGB6174_group	P28	0.019871	0.159397	1127.33	0.124664	0.900812	0.601909	0.677674	Mixed
Clostridium_sp_NSJ_42.t__SGB6174_group	B	0.226403	0.184801	1285.11	1.22512	0.220756	0.601909	0.677674	Mixed
Clostridium_sp_NSJ_42.t__SGB6174_group	M3	0.124023	0.152928	1127.77	0.81099	0.417543	0.601909	0.677674	Mixed
Clostridia_unclassified_SGB4367.t__SGB4367	P28	0.236429	0.210191	981.882	1.12483	0.260936	0.607646	0.681749	Mixed
Clostridia_unclassified_SGB4367.t__SGB4367	B	-0.0621937	0.252536	1064.12	-0.246277	0.805516	0.607646	0.681749	Mixed
Clostridia_unclassified_SGB4367.t__SGB4367	M3	0.00917889	0.201408	977.856	0.0455735	0.963659	0.607646	0.681749	Mixed
GGB9608_SGB15041.t__SGB15041	P28	0.140167	0.135823	983.083	1.03198	0.302335	0.612785	0.685127	Mixed
GGB9608_SGB15041.t__SGB15041	B	0.0338786	0.163195	1065.08	0.207596	0.835584	0.612785	0.685127	Mixed
GGB9608_SGB15041.t__SGB15041	M3	-0.0232196	0.130147	979.073	-0.17841	0.858438	0.612785	0.685127	Mixed
Phocaeicola_massiliensis.t__SGB1812	P28	-0.159931	0.146854	936.594	-1.08905	0.276412	0.618614	0.689252	Mixed
Phocaeicola_massiliensis.t__SGB1812	B	0.0787594	0.178504	986.108	0.44122	0.659151	0.618614	0.689252	Mixed
Phocaeicola_massiliensis.t__SGB1812	M3	-0.0563014	0.140654	935.552	-0.400282	0.689041	0.618614	0.689252	Mixed
Lachnospiraceae_bacterium.t__SGB4964	P28	-0.174928	0.173227	1089.58	-1.00982	0.312806	0.637459	0.707799	Mixed
Lachnospiraceae_bacterium.t__SGB4964	B	0.0555756	0.2033	1224.53	0.273367	0.784617	0.637459	0.707799	Mixed
Lachnospiraceae_bacterium.t__SGB4964	M3	-0.123915	0.16617	1085.7	-0.745715	0.456001	0.637459	0.707799	Mixed
Clostridia_bacterium.t__SGB3574	P28	0.107174	0.157237	1014.34	0.681607	0.495643	0.646479	0.715348	Mixed
Clostridia_bacterium.t__SGB3574	B	0.0757027	0.187476	1116.11	0.403799	0.686438	0.646479	0.715348	Mixed
Clostridia_bacterium.t__SGB3574	M3	0.19228	0.150727	1009.13	1.27569	0.20236	0.646479	0.715348	Mixed
Ruminococcus_bromii.t__SGB4285_group	P28	0.0382102	0.252297	1033.01	0.15145	0.879651	0.658448	0.726096	Mixed
Ruminococcus_bromii.t__SGB4285_group	B	-0.0277764	0.299096	1149.04	-0.0928678	0.926025	0.658448	0.726096	Mixed
Ruminococcus_bromii.t__SGB4285_group	M3	0.250943	0.241922	1027.61	1.03729	0.299845	0.658448	0.726096	Mixed
GGB2982_SGB3964.t__SGB3964	P28	-0.022224	0.133619	967.718	-0.166324	0.867937	0.675704	0.742582	Mixed
GGB2982_SGB3964.t__SGB3964	B	-0.0549458	0.161141	1039.73	-0.340981	0.733187	0.675704	0.742582	Mixed
GGB2982_SGB3964.t__SGB3964	M3	0.0989537	0.128013	964.582	0.772997	0.439714	0.675704	0.742582	Mixed
Alistipes_putredinis.t__SGB2318	P28	-0.0579656	0.121409	952.432	-0.477441	0.633158	0.702595	0.7669	Mixed
Alistipes_putredinis.t__SGB2318	B	-0.165544	0.14694	1014.47	-1.12661	0.260172	0.702595	0.7669	Mixed
Alistipes_putredinis.t__SGB2318	M3	-0.096398	0.116298	950.241	-0.828887	0.407376	0.702595	0.7669	Mixed
Ruminococcus_callidus.t__SGB4422	P28	-0.200319	0.185601	1019.43	-1.07929	0.280712	0.701343	0.7669	Mixed
Ruminococcus_callidus.t__SGB4422	B	-0.149637	0.220955	1125.09	-0.677229	0.4984	0.701343	0.7669	Mixed
Ruminococcus_callidus.t__SGB4422	M3	-0.0685523	0.177932	1014.1	-0.385273	0.700116	0.701343	0.7669	Mixed
Blautia_SGB4805.t__SGB4805	P28	-0.0269446	0.165256	1113.27	-0.163047	0.870511	0.708683	0.770932	Mixed
Blautia_SGB4805.t__SGB4805	B	0.176675	0.19301	1255.98	0.915367	0.360175	0.708683	0.770932	Mixed
Blautia_SGB4805.t__SGB4805	M3	-0.0357127	0.158541	1110.83	-0.225258	0.82182	0.708683	0.770932	Mixed
Bifidobacterium_adolescentis.t__SGB17244	P28	0.0851919	0.16408	977.637	0.519211	0.603731	0.721111	0.781811	Mixed
Bifidobacterium_adolescentis.t__SGB17244	B	0.133289	0.197095	1060.73	0.67627	0.499017	0.721111	0.781811	Mixed
Bifidobacterium_adolescentis.t__SGB17244	M3	-0.0421641	0.157225	973.555	-0.268177	0.78862	0.721111	0.781811	Mixed
Eubacterium_sp_AF34_35BH.t__SGB5051	P28	-0.0337527	0.144532	991.943	-0.23353	0.815398	0.745047	0.805051	Mixed
Eubacterium_sp_AF34_35BH.t__SGB5051	B	-0.162308	0.173236	1080.45	-0.936915	0.349011	0.745047	0.805051	Mixed
Eubacterium_sp_AF34_35BH.t__SGB5051	M3	0.012101	0.13851	987.442	0.0873656	0.930399	0.745047	0.805051	Mixed
Fusicatenibacter_saccharivorans.t__SGB4874	P28	-0.0569746	0.11929	1087.67	-0.477613	0.633022	0.754392	0.812422	Mixed
Fusicatenibacter_saccharivorans.t__SGB4874	B	0.105792	0.13959	1230.65	0.757874	0.448671	0.754392	0.812422	Mixed
Fusicatenibacter_saccharivorans.t__SGB4874	M3	0.00778546	0.114439	1084.56	0.0680317	0.945773	0.754392	0.812422	Mixed
Sutterella_wadsworthensis.t__SGB9286	P28	-0.0453771	0.139973	934.268	-0.324185	0.74587	0.771256	0.827815	Mixed
Sutterella_wadsworthensis.t__SGB9286	B	-0.112735	0.170332	980.381	-0.661857	0.508218	0.771256	0.827815	Mixed
Sutterella_wadsworthensis.t__SGB9286	M3	0.0412387	0.134061	933.509	0.307612	0.758446	0.771256	0.827815	Mixed
GGB9634_SGB15093.t__SGB15093	P28	-0.000282534	0.152128	952.975	-0.00185721	0.998519	0.776216	0.83037	Mixed
GGB9634_SGB15093.t__SGB15093	B	0.0972253	0.184057	1016	0.528235	0.597451	0.776216	0.83037	Mixed
GGB9634_SGB15093.t__SGB15093	M3	-0.0807679	0.145726	950.693	-0.554246	0.579541	0.776216	0.83037	Mixed
Clostridia_bacterium.t__SGB15383	P28	-0.0891659	0.106562	961.01	-0.836752	0.40294	0.780399	0.832081	Mixed
Clostridia_bacterium.t__SGB15383	B	-0.0419534	0.128933	1023.59	-0.325391	0.744952	0.780399	0.832081	Mixed
Clostridia_bacterium.t__SGB15383	M3	-0.0975218	0.102077	958.747	-0.955373	0.33963	0.780399	0.832081	Mixed
Candidatus_Avimicrobium_caecorum.t__SGB15350	P28	-0.0677634	0.150783	1011.69	-0.449412	0.653231	0.79961	0.846955	Mixed
Candidatus_Avimicrobium_caecorum.t__SGB15350	B	0.110971	0.1798	1113.41	0.617191	0.537235	0.79961	0.846955	Mixed
Candidatus_Avimicrobium_caecorum.t__SGB15350	M3	0.0478099	0.144539	1006.48	0.330775	0.740883	0.79961	0.846955	Mixed
Eubacterium_sp_AF15_50.t__SGB5042	P28	-0.0611951	0.1838	1074.77	-0.332944	0.739241	0.797296	0.846955	Mixed
Eubacterium_sp_AF15_50.t__SGB5042	B	-0.206959	0.215997	1208.78	-0.958158	0.338175	0.797296	0.846955	Mixed
Eubacterium_sp_AF15_50.t__SGB5042	M3	-0.120328	0.176304	1070.53	-0.682499	0.495071	0.797296	0.846955	Mixed
Lachnospiraceae_unclassified_SGB4924.t__SGB4924_group	P28	0.187751	0.197161	1086.91	0.952272	0.341171	0.817188	0.862737	Mixed
Lachnospiraceae_unclassified_SGB4924.t__SGB4924_group	B	0.0738893	0.231145	1225.12	0.319667	0.749275	0.817188	0.862737	Mixed
Lachnospiraceae_unclassified_SGB4924.t__SGB4924_group	M3	0.0688284	0.189134	1083.28	0.363914	0.715993	0.817188	0.862737	Mixed
Alistipes_shahii.t__SGB2295	P28	0.00042899	0.118153	944.282	0.00363079	0.997104	0.846119	0.890361	Mixed
Alistipes_shahii.t__SGB2295	B	-0.112542	0.143256	1001.22	-0.785604	0.432286	0.846119	0.890361	Mixed
Alistipes_shahii.t__SGB2295	M3	-0.0617352	0.113173	942.574	-0.545495	0.585542	0.846119	0.890361	Mixed
Ruminococcaceae_unclassified_SGB15260.t__SGB15260	P28	7.62e-05	0.14308	958.737	0.000532769	0.999575	0.855342	0.897134	Mixed
Ruminococcaceae_unclassified_SGB15260.t__SGB15260	B	0.145645	0.173029	1022.92	0.841739	0.400131	0.855342	0.897134	Mixed
Ruminococcaceae_unclassified_SGB15260.t__SGB15260	M3	0.0273617	0.137061	956.333	0.199631	0.841811	0.855342	0.897134	Mixed
Parabacteroides_distasonis.t__SGB1934	P28	-0.0765169	0.126514	1013.02	-0.604809	0.545441	0.860103	0.897558	Mixed
Parabacteroides_distasonis.t__SGB1934	B	0.0546098	0.150508	1121.33	0.362838	0.716794	0.860103	0.897558	Mixed
Parabacteroides_distasonis.t__SGB1934	M3	0.00437955	0.12129	1007.62	0.036108	0.971203	0.860103	0.897558	Mixed
Clostridia_bacterium.t__SGB15390	P28	0.0805204	0.192189	1059.79	0.418964	0.675327	0.864108	0.897558	Mixed
Clostridia_bacterium.t__SGB15390	B	-0.128442	0.226201	1192.12	-0.567824	0.570261	0.864108	0.897558	Mixed
Clostridia_bacterium.t__SGB15390	M3	0.00103468	0.184342	1055.2	0.00561284	0.995523	0.864108	0.897558	Mixed
Dysosmobacter_sp_NSJ_60.t__SGB15124	P28	-0.107421	0.177927	1055.75	-0.60374	0.546146	0.863162	0.897558	Mixed
Dysosmobacter_sp_NSJ_60.t__SGB15124	B	-0.127143	0.210211	1178.3	-0.604835	0.545405	0.863162	0.897558	Mixed
Dysosmobacter_sp_NSJ_60.t__SGB15124	M3	-0.0151135	0.170636	1050.63	-0.0885714	0.929439	0.863162	0.897558	Mixed
Bacteroides_caccae.t__SGB1877	P28	0.0892013	0.158784	962.662	0.561778	0.574398	0.867341	0.898018	Mixed
Bacteroides_caccae.t__SGB1877	B	0.14833	0.191771	1030.54	0.773477	0.439418	0.867341	0.898018	Mixed
Bacteroides_caccae.t__SGB1877	M3	0.074502	0.152112	959.91	0.489783	0.6244	0.867341	0.898018	Mixed
Blautia_sp_OF03_15BH.t__SGB4779	P28	0.0146704	0.138582	1039.43	0.105861	0.915713	0.876535	0.904629	Mixed
Blautia_sp_OF03_15BH.t__SGB4779	B	0.131083	0.164047	1158.77	0.799057	0.424421	0.876535	0.904629	Mixed
Blautia_sp_OF03_15BH.t__SGB4779	M3	0.0226219	0.132892	1034.1	0.170227	0.864865	0.876535	0.904629	Mixed
Clostridia_bacterium.t__SGB3989	P28	-0.0879548	0.126604	956.569	-0.694722	0.487398	0.883009	0.908399	Mixed
Clostridia_bacterium.t__SGB3989	B	-0.0856719	0.153186	1019.26	-0.559267	0.576102	0.883009	0.908399	Mixed
Clostridia_bacterium.t__SGB3989	M3	-0.0400514	0.121276	954.308	-0.33025	0.741284	0.883009	0.908399	Mixed
Alistipes_ihumii.t__SGB2328	P28	-0.0183024	0.157086	962.767	-0.116512	0.907271	0.895605	0.917264	Mixed
Alistipes_ihumii.t__SGB2328	B	-0.0689876	0.18965	1031.73	-0.363763	0.71611	0.895605	0.917264	Mixed
Alistipes_ihumii.t__SGB2328	M3	0.0582105	0.150488	959.917	0.386812	0.698981	0.895605	0.917264	Mixed
Roseburia_hominis.t__SGB4936	P28	-0.006646	0.157896	1125.39	-0.0420911	0.966434	0.897323	0.917264	Mixed
Roseburia_hominis.t__SGB4936	B	0.0407426	0.184172	1268.73	0.22122	0.824956	0.897323	0.917264	Mixed
Roseburia_hominis.t__SGB4936	M3	0.0961504	0.151483	1123.42	0.634729	0.525735	0.897323	0.917264	Mixed
Clostridia_bacterium.t__SGB15370	P28	-0.0786452	0.126618	978.25	-0.621122	0.534664	0.925517	0.94309	Mixed
Clostridia_bacterium.t__SGB15370	B	-0.0473748	0.152478	1053.93	-0.310699	0.756091	0.925517	0.94309	Mixed
Clostridia_bacterium.t__SGB15370	M3	-0.0193389	0.121314	974.766	-0.159412	0.873377	0.925517	0.94309	Mixed
Oscillibacter_sp_ER4.t__SGB15254	P28	-0.0888971	0.14276	985.961	-0.622705	0.533622	0.939321	0.954136	Mixed
Oscillibacter_sp_ER4.t__SGB15254	B	-0.0431283	0.171408	1069.84	-0.251612	0.801389	0.939321	0.954136	Mixed
Oscillibacter_sp_ER4.t__SGB15254	M3	-0.0592973	0.136799	981.801	-0.433463	0.664774	0.939321	0.954136	Mixed
GGB9632_SGB15089.t__SGB15089	P28	0.0203851	0.148909	1001.72	0.136897	0.89114	0.947601	0.95952	Mixed
GGB9632_SGB15089.t__SGB15089	B	-0.0686692	0.17787	1099.39	-0.386064	0.699524	0.947601	0.95952	Mixed
GGB9632_SGB15089.t__SGB15089	M3	0.0347169	0.14273	996.677	0.243235	0.807873	0.947601	0.95952	Mixed
Candidatus_Pararuminococcus_gallinarum.t__SGB63327	P28	0.013357	0.14374	1090.25	0.0929247	0.92598	0.975866	0.983163	Mixed
Candidatus_Pararuminococcus_gallinarum.t__SGB63327	B	-0.0311866	0.168002	1235.83	-0.185633	0.852763	0.975866	0.983163	Mixed
Candidatus_Pararuminococcus_gallinarum.t__SGB63327	M3	0.0403481	0.137897	1087.51	0.292595	0.769888	0.975866	0.983163	Mixed
Pseudoflavonifractor_capillosus.t__SGB15140	P28	0.0325807	0.144779	1034.3	0.225037	0.821995	0.977057	0.983163	Mixed
Pseudoflavonifractor_capillosus.t__SGB15140	B	0.0538685	0.171557	1151.44	0.313997	0.75358	0.977057	0.983163	Mixed
Pseudoflavonifractor_capillosus.t__SGB15140	M3	-0.00631774	0.138828	1028.92	-0.0455075	0.963712	0.977057	0.983163	Mixed
Phascolarctobacterium_faecium.t__SGB5792	P28	-0.0515993	0.130945	933.518	-0.394055	0.693631	0.983718	0.986782	Mixed
Phascolarctobacterium_faecium.t__SGB5792	B	-0.0137898	0.159423	978.156	-0.0864979	0.931088	0.983718	0.986782	Mixed
Phascolarctobacterium_faecium.t__SGB5792	M3	-0.0317563	0.125413	932.876	-0.253214	0.800159	0.983718	0.986782	Mixed
GGB6613_SGB9347.t__SGB9347	P28	-0.014864	0.167626	978.497	-0.088674	0.929359	0.986869	0.986869	Mixed
GGB6613_SGB9347.t__SGB9347	B	-0.0514008	0.201522	1059.1	-0.255063	0.798724	0.986869	0.986869	Mixed
GGB6613_SGB9347.t__SGB9347	M3	0.0159834	0.160617	974.608	0.0995127	0.920752	0.986869	0.986869	Mixed

## Sheet: Table S18.
Table S18. Associations of time with the overall infant gut microbiome (reference time point: 2 weeks (W2); M1: 1 month, M2: 2 months, M3: 3 months, M6: 6 months, M9: 9 months, M12: 12 months; green: FDR<0.05)
Principal Components	Phenotype	Estimate	Standard Error	Degrees of Freedom	T-value	Pr(>|t|)	P-value	FDR	Model
PC2	M1	0.169654	0.344868	2430.35	0.49194	0.622806	0	0	Mixed
PC2	M2	0.0134214	0.339073	2436.2	0.0395826	0.968429	0	0	Mixed
PC2	M3	-0.365953	0.339343	2464.3	-1.07841	0.280954	0	0	Mixed
PC2	M6	-2.71018	0.390826	2684.1	-6.9345	5.09e-12	0	0	Mixed
PC2	M9	-10.2806	0.397087	2665	-25.89	5.04e-132	0	0	Mixed
PC2	M12	-14.4455	0.397702	2692.5	-36.3224	1.89e-235	0	0	Mixed
PC1	M1	1.86764	0.461159	2440.41	4.04987	5.28e-05	3.31e-215	3.31e-214	Mixed
PC1	M2	2.59183	0.453366	2445.88	5.71687	1.22e-08	3.31e-215	3.31e-214	Mixed
PC1	M3	2.25725	0.453504	2473.7	4.97735	6.89e-07	3.31e-215	3.31e-214	Mixed
PC1	M6	4.32682	0.520169	2685.58	8.3181	1.4e-16	3.31e-215	3.31e-214	Mixed
PC1	M9	8.61327	0.528706	2667.82	16.2912	5.85e-57	3.31e-215	3.31e-214	Mixed
PC1	M12	15.9594	0.529209	2697.08	30.157	2.02e-172	3.31e-215	3.31e-214	Mixed
PC3	M1	-3.01482	0.368875	2459.67	-8.17301	4.76e-16	1.66e-202	1.11e-201	Mixed
PC3	M2	-5.882	0.362574	2463.71	-16.2229	2.59e-56	1.66e-202	1.11e-201	Mixed
PC3	M3	-7.50611	0.362297	2490.66	-20.7181	4.21e-88	1.66e-202	1.11e-201	Mixed
PC3	M6	-11.591	0.412026	2681.97	-28.1317	8.33e-153	1.66e-202	1.11e-201	Mixed
PC3	M9	-10.2662	0.419098	2667.81	-24.4959	1.07e-119	1.66e-202	1.11e-201	Mixed
PC3	M12	-5.21327	0.418887	2700.85	-12.4455	1.29e-34	1.66e-202	1.11e-201	Mixed
PC5	M1	-1.95063	0.377193	2496.86	-5.17144	2.51e-07	3.44e-63	1.72e-62	Mixed
PC5	M2	-3.7295	0.370712	2498.83	-10.0604	2.29e-23	3.44e-63	1.72e-62	Mixed
PC5	M3	-4.51664	0.370106	2523.85	-12.2036	2.53e-33	3.44e-63	1.72e-62	Mixed
PC5	M6	-3.56833	0.418193	2689.39	-8.53273	2.35e-17	3.44e-63	1.72e-62	Mixed
PC5	M9	0.408467	0.425575	2679.35	0.959802	0.337242	3.44e-63	1.72e-62	Mixed
PC5	M12	-0.607441	0.424787	2713.35	-1.42999	0.152835	3.44e-63	1.72e-62	Mixed
PC4	M1	-1.91296	0.37389	2461.3	-5.11637	3.36e-07	9.82e-56	3.93e-55	Mixed
PC4	M2	-2.21267	0.367486	2464.68	-6.0211	1.99e-09	9.82e-56	3.93e-55	Mixed
PC4	M3	-2.41113	0.36708	2491.49	-6.5684	6.17e-11	9.82e-56	3.93e-55	Mixed
PC4	M6	-4.60737	0.416383	2677.14	-11.0652	7.36e-28	9.82e-56	3.93e-55	Mixed
PC4	M9	-6.65355	0.423616	2664.22	-15.7065	3.1e-53	9.82e-56	3.93e-55	Mixed
PC4	M12	-3.11508	0.423186	2698.67	-7.36102	2.41e-13	9.82e-56	3.93e-55	Mixed
PC11	M1	-2.08258	0.273099	2470.49	-7.62574	3.44e-14	2.21e-39	7.37e-39	Mixed
PC11	M2	-2.53565	0.26842	2473.76	-9.44659	7.82e-21	2.21e-39	7.37e-39	Mixed
PC11	M3	-3.07212	0.268117	2500.15	-11.4582	1.16e-29	2.21e-39	7.37e-39	Mixed
PC11	M6	-3.98542	0.304072	2682.18	-13.1068	4.34e-38	2.21e-39	7.37e-39	Mixed
PC11	M9	-3.18001	0.309359	2669.6	-10.2794	2.47e-24	2.21e-39	7.37e-39	Mixed
PC11	M12	-2.49865	0.309032	2703.5	-8.08538	9.25e-16	2.21e-39	7.37e-39	Mixed
PC6	M1	2.12669	0.303024	2454.6	7.01823	2.9e-12	7.24e-34	2.07e-33	Mixed
PC6	M2	3.19235	0.297887	2459.7	10.7166	3.19e-26	7.24e-34	2.07e-33	Mixed
PC6	M3	3.59534	0.29789	2486.93	12.0693	1.23e-32	7.24e-34	2.07e-33	Mixed
PC6	M6	2.43791	0.340861	2690.25	7.1522	1.1e-12	7.24e-34	2.07e-33	Mixed
PC6	M9	2.68366	0.34653	2673.67	7.74437	1.35e-14	7.24e-34	2.07e-33	Mixed
PC6	M12	3.23143	0.34673	2703.46	9.31972	2.35e-20	7.24e-34	2.07e-33	Mixed
PC8	M1	1.09392	0.252508	2441.21	4.33224	1.54e-05	8.94e-26	2.23e-25	Mixed
PC8	M2	1.97108	0.248257	2446.88	7.93967	3.06e-15	8.94e-26	2.23e-25	Mixed
PC8	M3	2.44272	0.248413	2474.57	9.83327	2.07e-22	8.94e-26	2.23e-25	Mixed
PC8	M6	2.3511	0.285702	2688.95	8.22922	2.9e-16	8.94e-26	2.23e-25	Mixed
PC8	M9	2.60294	0.290317	2670.55	8.96585	5.65e-19	8.94e-26	2.23e-25	Mixed
PC8	M12	2.08789	0.29071	2698.24	7.18201	8.85e-13	8.94e-26	2.23e-25	Mixed
PC18	M1	0.748315	0.214505	2463.61	3.48856	0.000494141	1.67e-12	3.72e-12	Mixed
PC18	M2	0.947028	0.210871	2468.69	4.49102	7.41e-06	1.67e-12	3.72e-12	Mixed
PC18	M3	1.29579	0.210889	2495.49	6.14439	9.31e-10	1.67e-12	3.72e-12	Mixed
PC18	M6	1.07614	0.241452	2696.15	4.45694	8.65e-06	1.67e-12	3.72e-12	Mixed
PC18	M9	0.208531	0.245455	2679.7	0.849571	0.39564	1.67e-12	3.72e-12	Mixed
PC18	M12	0.0951618	0.245619	2708.61	0.387436	0.698464	1.67e-12	3.72e-12	Mixed
PC9	M1	0.890827	0.277285	2485.02	3.21267	0.00133187	2.16e-12	4.33e-12	Mixed
PC9	M2	1.25389	0.272552	2489.02	4.60054	4.43e-06	2.16e-12	4.33e-12	Mixed
PC9	M3	1.40081	0.272367	2514.8	5.14308	2.91e-07	2.16e-12	4.33e-12	Mixed
PC9	M6	1.69884	0.309955	2698.02	5.48094	4.62e-08	2.16e-12	4.33e-12	Mixed
PC9	M9	-0.0183647	0.315258	2684.34	-0.0582528	0.953552	2.16e-12	4.33e-12	Mixed
PC9	M12	1.05916	0.315138	2715.28	3.36093	0.000787559	2.16e-12	4.33e-12	Mixed
PC16	M1	0.69886	0.251602	2486.81	2.77764	0.00551665	2.44e-08	4.43e-08	Mixed
PC16	M2	0.515067	0.247286	2489.56	2.08288	0.0373638	2.44e-08	4.43e-08	Mixed
PC16	M3	-0.1756	0.246956	2515.13	-0.711056	0.477116	2.44e-08	4.43e-08	Mixed
PC16	M6	-0.474872	0.279653	2688.45	-1.69808	0.0896091	2.44e-08	4.43e-08	Mixed
PC16	M9	0.689927	0.284546	2677.03	2.42466	0.0153887	2.44e-08	4.43e-08	Mixed
PC16	M12	0.736665	0.284157	2710.59	2.59246	0.00958045	2.44e-08	4.43e-08	Mixed
PC7	M1	-0.355253	0.25709	2430.86	-1.38182	0.167154	3.64e-07	6.07e-07	Mixed
PC7	M2	-0.447614	0.252798	2436.84	-1.77064	0.0767454	3.64e-07	6.07e-07	Mixed
PC7	M3	-0.749771	0.253126	2464.57	-2.96205	0.00308523	3.64e-07	6.07e-07	Mixed
PC7	M6	-0.54088	0.29279	2686.4	-1.84733	0.0648093	3.64e-07	6.07e-07	Mixed
PC7	M9	0.724373	0.297357	2666.6	2.43604	0.0149141	3.64e-07	6.07e-07	Mixed
PC7	M12	-0.156295	0.297987	2691.74	-0.524504	0.599972	3.64e-07	6.07e-07	Mixed
PC14	M1	-0.547954	0.245278	2453.79	-2.23401	0.0255723	4.54e-06	6.99e-06	Mixed
PC14	M2	-0.951904	0.241097	2458.22	-3.94823	8.09e-05	4.54e-06	6.99e-06	Mixed
PC14	M3	-1.07358	0.240965	2485.47	-4.45535	8.75e-06	4.54e-06	6.99e-06	Mixed
PC14	M6	-0.684824	0.274506	2682.05	-2.49475	0.0126642	4.54e-06	6.99e-06	Mixed
PC14	M9	-0.198386	0.279179	2667.01	-0.710606	0.477391	4.54e-06	6.99e-06	Mixed
PC14	M12	-0.991909	0.279126	2699.44	-3.55362	0.000386476	4.54e-06	6.99e-06	Mixed
PC13	M1	0.419043	0.251687	2478.49	1.66494	0.0960511	5.43e-05	7.75e-05	Mixed
PC13	M2	0.455653	0.247387	2482.41	1.84186	0.0656148	5.43e-05	7.75e-05	Mixed
PC13	M3	-0.121667	0.2472	2508.49	-0.492179	0.622636	5.43e-05	7.75e-05	Mixed
PC13	M6	-0.690913	0.281144	2693.03	-2.4575	0.0140533	5.43e-05	7.75e-05	Mixed
PC13	M9	0.1179	0.285969	2679.4	0.412282	0.680166	5.43e-05	7.75e-05	Mixed
PC13	M12	0.3015	0.285827	2711.13	1.05483	0.291595	5.43e-05	7.75e-05	Mixed
PC20	M1	-0.818997	0.24027	2486.16	-3.40866	0.000663235	0.000153314	0.000204418	Mixed
PC20	M2	-0.945972	0.236148	2488.94	-4.00584	6.36e-05	0.000153314	0.000204418	Mixed
PC20	M3	-1.08022	0.235837	2514.55	-4.58035	4.87e-06	0.000153314	0.000204418	Mixed
PC20	M6	-1.17007	0.267092	2688.32	-4.38076	1.23e-05	0.000153314	0.000204418	Mixed
PC20	M9	-0.813627	0.271764	2676.83	-2.99388	0.00277978	0.000153314	0.000204418	Mixed
PC20	M12	-1.03698	0.271398	2710.38	-3.82088	0.000135962	0.000153314	0.000204418	Mixed
PC15	M1	0.875322	0.230514	2481.7	3.79727	0.000149806	0.00019335	0.000241688	Mixed
PC15	M2	0.638691	0.226591	2486.2	2.81869	0.00486013	0.00019335	0.000241688	Mixed
PC15	M3	0.472761	0.226515	2512.17	2.08711	0.0369791	0.00019335	0.000241688	Mixed
PC15	M6	1.12088	0.258467	2701.05	4.33667	1.5e-05	0.00019335	0.000241688	Mixed
PC15	M9	0.748801	0.26283	2686.28	2.84899	0.00441918	0.00019335	0.000241688	Mixed
PC15	M12	0.446917	0.262857	2715.94	1.70022	0.0892033	0.00019335	0.000241688	Mixed
PC10	M1	0.598255	0.262425	2438.89	2.27972	0.0227102	0.000256968	0.000302315	Mixed
PC10	M2	0.945441	0.257974	2444.08	3.66487	0.000252729	0.000256968	0.000302315	Mixed
PC10	M3	1.0592	0.257967	2472.02	4.10597	4.16e-05	0.000256968	0.000302315	Mixed
PC10	M6	0.733846	0.295087	2680.89	2.48688	0.0129474	0.000256968	0.000302315	Mixed
PC10	M9	0.1975	0.300004	2663.88	0.658326	0.510386	0.000256968	0.000302315	Mixed
PC10	M12	0.599743	0.300161	2694.82	1.99807	0.0458092	0.000256968	0.000302315	Mixed
PC17	M1	-0.777982	0.248275	2492.28	-3.13354	0.00174717	0.000454114	0.000504571	Mixed
PC17	M2	-0.914996	0.244014	2494.78	-3.74977	0.000181022	0.000454114	0.000504571	Mixed
PC17	M3	-0.513148	0.243665	2520.07	-2.10596	0.0353065	0.000454114	0.000504571	Mixed
PC17	M6	-0.529514	0.275732	2690.09	-1.9204	0.0549133	0.000454114	0.000504571	Mixed
PC17	M9	-0.594846	0.28057	2679.16	-2.12013	0.0340865	0.000454114	0.000504571	Mixed
PC17	M12	0.00997286	0.280143	2712.71	0.0355991	0.971605	0.000454114	0.000504571	Mixed
PC12	M1	0.273909	0.258887	2456.61	1.05803	0.290148	0.0338921	0.0356759	Mixed
PC12	M2	0.598429	0.254484	2461.35	2.35154	0.0187742	0.0338921	0.0356759	Mixed
PC12	M3	0.723994	0.254407	2488.49	2.84581	0.00446618	0.0338921	0.0356759	Mixed
PC12	M6	0.897826	0.290375	2687.28	3.09195	0.00200886	0.0338921	0.0356759	Mixed
PC12	M9	0.578568	0.29527	2671.6	1.95945	0.0501635	0.0338921	0.0356759	Mixed
PC12	M12	0.53896	0.295315	2702.72	1.82503	0.0681065	0.0338921	0.0356759	Mixed
PC19	M1	-0.127485	0.2242	2488.13	-0.568623	0.569663	0.614598	0.614598	Mixed
PC19	M2	-0.261324	0.220376	2492.24	-1.18581	0.23581	0.614598	0.614598	Mixed
PC19	M3	-0.341744	0.220246	2517.89	-1.55165	0.120872	0.614598	0.614598	Mixed
PC19	M6	-0.0463685	0.250814	2701.14	-0.184872	0.853343	0.614598	0.614598	Mixed
PC19	M9	-0.297517	0.255091	2687.28	-1.16632	0.24359	0.614598	0.614598	Mixed
PC19	M12	-0.122711	0.255027	2717.63	-0.481167	0.630437	0.614598	0.614598	Mixed

## Sheet: Table S19.
Table S19. Associations of time with infant gut microbiome species (reference time point: 2 weeks (W2); M1: 1 month, M2: 2 months, M3: 3 months, M6: 6 months, M9: 9 months, M12: 12 months; green: FDR<0.05)
Taxa	Phenotype	Estimate	Standard Error	Degrees of Freedom	T-value	Pr(>|t|)	P-value	FDR	Model
Staphylococcus_epidermidis.t__SGB7865	M1	-5.70659	0.151118	2469.76	-37.7625	9.85e-247	0	0	Mixed
Staphylococcus_epidermidis.t__SGB7865	M2	-7.3257	0.149028	2472.4	-49.1566	0	0	0	Mixed
Staphylococcus_epidermidis.t__SGB7865	M3	-7.71656	0.147485	2511.02	-52.321	0	0	0	Mixed
Staphylococcus_epidermidis.t__SGB7865	M6	-8.41248	0.166267	2613.88	-50.5963	0	0	0	Mixed
Staphylococcus_epidermidis.t__SGB7865	M9	-9.11979	0.170194	2618.19	-53.5847	0	0	0	Mixed
Staphylococcus_epidermidis.t__SGB7865	M12	-9.5655	0.169948	2701.35	-56.2847	0	0	0	Mixed
Staphylococcus_hominis.t__SGB7858	M1	-2.43317	0.124051	2457.28	-19.6142	1.07e-79	9.17e-296	4.81e-294	Mixed
Staphylococcus_hominis.t__SGB7858	M2	-3.52199	0.122329	2458.94	-28.7912	2.44e-157	9.17e-296	4.81e-294	Mixed
Staphylococcus_hominis.t__SGB7858	M3	-3.64485	0.120937	2499.98	-30.1383	1.74e-170	9.17e-296	4.81e-294	Mixed
Staphylococcus_hominis.t__SGB7858	M6	-4.11228	0.135916	2625.78	-30.256	8.92e-173	9.17e-296	4.81e-294	Mixed
Staphylococcus_hominis.t__SGB7858	M9	-4.71799	0.139101	2634.58	-33.9177	1.48e-209	9.17e-296	4.81e-294	Mixed
Staphylococcus_hominis.t__SGB7858	M12	-5.15322	0.138547	2719.86	-37.1946	3.59e-245	9.17e-296	4.81e-294	Mixed
Flavonifractor_plautii.t__SGB15132	M1	0.174344	0.215648	2580.83	0.808466	0.418897	3.07e-213	1.07e-211	Mixed
Flavonifractor_plautii.t__SGB15132	M2	0.507715	0.212658	2582.52	2.38747	0.0170363	3.07e-213	1.07e-211	Mixed
Flavonifractor_plautii.t__SGB15132	M3	0.608465	0.21033	2613.99	2.8929	0.00384858	3.07e-213	1.07e-211	Mixed
Flavonifractor_plautii.t__SGB15132	M6	1.63067	0.236702	2703.46	6.88911	6.96e-12	3.07e-213	1.07e-211	Mixed
Flavonifractor_plautii.t__SGB15132	M9	4.45324	0.242271	2708.56	18.3812	3.33e-71	3.07e-213	1.07e-211	Mixed
Flavonifractor_plautii.t__SGB15132	M12	6.2927	0.241564	2772.58	26.0498	5.26e-134	3.07e-213	1.07e-211	Mixed
Staphylococcus_aureus.t__SGB7852	M1	-0.961919	0.148502	2469.1	-6.4775	1.12e-10	5.4e-184	1.42e-182	Mixed
Staphylococcus_aureus.t__SGB7852	M2	-1.91142	0.146451	2471.96	-13.0516	1.07e-37	5.4e-184	1.42e-182	Mixed
Staphylococcus_aureus.t__SGB7852	M3	-2.38642	0.144985	2509.94	-16.4598	6.91e-58	5.4e-184	1.42e-182	Mixed
Staphylococcus_aureus.t__SGB7852	M6	-3.29129	0.163601	2606.59	-20.1179	8.57e-84	5.4e-184	1.42e-182	Mixed
Staphylococcus_aureus.t__SGB7852	M9	-3.95784	0.167471	2609.8	-23.633	4.67e-112	5.4e-184	1.42e-182	Mixed
Staphylococcus_aureus.t__SGB7852	M12	-4.35837	0.167372	2692.51	-26.0401	1.61e-133	5.4e-184	1.42e-182	Mixed
Blautia_wexlerae.t__SGB4837_group	M1	0.139449	0.192588	2578.84	0.724081	0.469081	2.84e-175	5.96e-174	Mixed
Blautia_wexlerae.t__SGB4837_group	M2	0.392239	0.189914	2580.12	2.06535	0.0389894	2.84e-175	5.96e-174	Mixed
Blautia_wexlerae.t__SGB4837_group	M3	0.526869	0.187751	2612.19	2.80622	0.00504983	2.84e-175	5.96e-174	Mixed
Blautia_wexlerae.t__SGB4837_group	M6	0.950292	0.210994	2709.05	4.50388	6.95e-06	2.84e-175	5.96e-174	Mixed
Blautia_wexlerae.t__SGB4837_group	M9	3.22772	0.215937	2715.77	14.9475	1.31e-48	2.84e-175	5.96e-174	Mixed
Blautia_wexlerae.t__SGB4837_group	M12	5.11882	0.215069	2779.74	23.8008	4.08e-114	2.84e-175	5.96e-174	Mixed
Faecalibacterium_prausnitzii.t__SGB15316_group	M1	-0.00288705	0.204738	2583.35	-0.0141012	0.98875	4.54e-174	7.95e-173	Mixed
Faecalibacterium_prausnitzii.t__SGB15316_group	M2	-0.167522	0.201892	2584.11	-0.829759	0.406752	4.54e-174	7.95e-173	Mixed
Faecalibacterium_prausnitzii.t__SGB15316_group	M3	-0.196192	0.199497	2616.14	-0.983435	0.325484	4.54e-174	7.95e-173	Mixed
Faecalibacterium_prausnitzii.t__SGB15316_group	M6	0.159042	0.223835	2719.42	0.710533	0.477434	4.54e-174	7.95e-173	Mixed
Faecalibacterium_prausnitzii.t__SGB15316_group	M9	2.29383	0.229049	2728.03	10.0146	3.29e-23	4.54e-174	7.95e-173	Mixed
Faecalibacterium_prausnitzii.t__SGB15316_group	M12	5.09749	0.227861	2790.41	22.3711	4.27e-102	4.54e-174	7.95e-173	Mixed
Anaerostipes_hadrus.t__SGB4540_group	M1	0.00195026	0.169612	2603.57	0.0114984	0.990827	8.58e-171	1.29e-169	Mixed
Anaerostipes_hadrus.t__SGB4540_group	M2	0.123421	0.167254	2604.12	0.737928	0.460625	8.58e-171	1.29e-169	Mixed
Anaerostipes_hadrus.t__SGB4540_group	M3	0.104752	0.165246	2634.6	0.633916	0.526191	8.58e-171	1.29e-169	Mixed
Anaerostipes_hadrus.t__SGB4540_group	M6	0.146701	0.185311	2734.63	0.791651	0.428633	8.58e-171	1.29e-169	Mixed
Anaerostipes_hadrus.t__SGB4540_group	M9	2.21433	0.189618	2743.4	11.6778	8.75e-31	8.58e-171	1.29e-169	Mixed
Anaerostipes_hadrus.t__SGB4540_group	M12	4.25485	0.188567	2801.93	22.5641	9.96e-104	8.58e-171	1.29e-169	Mixed
Ruminococcus_gnavus.t__SGB4584	M1	0.455878	0.242641	2506.29	1.87881	0.0603861	5.13e-135	6.73e-134	Mixed
Ruminococcus_gnavus.t__SGB4584	M2	0.634797	0.239305	2509.27	2.65267	0.00803618	5.13e-135	6.73e-134	Mixed
Ruminococcus_gnavus.t__SGB4584	M3	0.847148	0.237076	2543.11	3.57332	0.000359038	5.13e-135	6.73e-134	Mixed
Ruminococcus_gnavus.t__SGB4584	M6	2.36789	0.267994	2621.29	8.83562	1.79e-18	5.13e-135	6.73e-134	Mixed
Ruminococcus_gnavus.t__SGB4584	M9	5.4766	0.274346	2622.54	19.9624	1.19e-82	5.13e-135	6.73e-134	Mixed
Ruminococcus_gnavus.t__SGB4584	M12	4.65658	0.274664	2697.09	16.9537	2.43e-61	5.13e-135	6.73e-134	Mixed
Cutibacterium_avidum.t__SGB16953	M1	-0.314743	0.182238	2489.31	-1.72709	0.0842749	1.94e-132	2.26e-131	Mixed
Cutibacterium_avidum.t__SGB16953	M2	-0.836981	0.179719	2491.92	-4.65716	3.37e-06	1.94e-132	2.26e-131	Mixed
Cutibacterium_avidum.t__SGB16953	M3	-1.45407	0.177877	2529.01	-8.17458	4.64e-16	1.94e-132	2.26e-131	Mixed
Cutibacterium_avidum.t__SGB16953	M6	-2.87206	0.200586	2626.22	-14.3184	7.83e-45	1.94e-132	2.26e-131	Mixed
Cutibacterium_avidum.t__SGB16953	M9	-3.58555	0.205326	2630.03	-17.4627	1.07e-64	1.94e-132	2.26e-131	Mixed
Cutibacterium_avidum.t__SGB16953	M12	-4.0127	0.205083	2709.71	-19.5662	7.55e-80	1.94e-132	2.26e-131	Mixed
Erysipelatoclostridium_ramosum.t__SGB6744	M1	0.285123	0.196423	2529.63	1.45158	0.146744	5.82e-131	6.11e-130	Mixed
Erysipelatoclostridium_ramosum.t__SGB6744	M2	0.420442	0.193703	2531.79	2.17055	0.0300581	5.82e-131	6.11e-130	Mixed
Erysipelatoclostridium_ramosum.t__SGB6744	M3	0.47906	0.191647	2566.65	2.4997	0.0124919	5.82e-131	6.11e-130	Mixed
Erysipelatoclostridium_ramosum.t__SGB6744	M6	2.25504	0.215891	2662.07	10.4453	4.66e-25	5.82e-131	6.11e-130	Mixed
Erysipelatoclostridium_ramosum.t__SGB6744	M9	4.32069	0.220982	2666.7	19.5522	1.15e-79	5.82e-131	6.11e-130	Mixed
Erysipelatoclostridium_ramosum.t__SGB6744	M12	3.30402	0.22052	2739.72	14.9829	7.75e-49	5.82e-131	6.11e-130	Mixed
Streptococcus_salivarius.t__SGB8007_group	M1	-2.31937	0.230468	2535.13	-10.0637	2.18e-23	3.56e-128	3.4e-127	Mixed
Streptococcus_salivarius.t__SGB8007_group	M2	-3.80167	0.22727	2536.79	-16.7275	1.16e-59	3.56e-128	3.4e-127	Mixed
Streptococcus_salivarius.t__SGB8007_group	M3	-4.5024	0.224735	2571.96	-20.0343	4.37e-83	3.56e-128	3.4e-127	Mixed
Streptococcus_salivarius.t__SGB8007_group	M6	-5.46275	0.252748	2675.44	-21.6134	1.28e-95	3.56e-128	3.4e-127	Mixed
Streptococcus_salivarius.t__SGB8007_group	M9	-4.69226	0.258683	2681.97	-18.139	1.88e-69	3.56e-128	3.4e-127	Mixed
Streptococcus_salivarius.t__SGB8007_group	M12	-5.00434	0.257794	2753.88	-19.4122	8.86e-79	3.56e-128	3.4e-127	Mixed
Enterococcus_faecalis.t__SGB7962	M1	-0.127043	0.237084	2505.3	-0.535857	0.592105	1.72e-121	1.5e-120	Mixed
Enterococcus_faecalis.t__SGB7962	M2	0.449985	0.233813	2508.06	1.92455	0.0543992	1.72e-121	1.5e-120	Mixed
Enterococcus_faecalis.t__SGB7962	M3	1.20479	0.231508	2543.26	5.20409	2.11e-07	1.72e-121	1.5e-120	Mixed
Enterococcus_faecalis.t__SGB7962	M6	1.00251	0.261339	2630.67	3.83605	0.000127966	1.72e-121	1.5e-120	Mixed
Enterococcus_faecalis.t__SGB7962	M9	-2.1921	0.267525	2633.23	-8.19399	3.9e-16	1.72e-121	1.5e-120	Mixed
Enterococcus_faecalis.t__SGB7962	M12	-3.87355	0.267468	2709.5	-14.4823	7.73e-46	1.72e-121	1.5e-120	Mixed
Lactobacillus_gasseri.t__SGB7038_group	M1	0.123537	0.169076	2503.5	0.730659	0.465056	1.71e-112	1.38e-111	Mixed
Lactobacillus_gasseri.t__SGB7038_group	M2	-0.0599517	0.166746	2506.37	-0.359538	0.719223	1.71e-112	1.38e-111	Mixed
Lactobacillus_gasseri.t__SGB7038_group	M3	-0.564973	0.165133	2541.26	-3.42132	0.000633025	1.71e-112	1.38e-111	Mixed
Lactobacillus_gasseri.t__SGB7038_group	M6	-1.8857	0.186502	2625.82	-10.1109	1.33e-23	1.71e-112	1.38e-111	Mixed
Lactobacillus_gasseri.t__SGB7038_group	M9	-2.6475	0.190919	2627.91	-13.8671	2.97e-42	1.71e-112	1.38e-111	Mixed
Lactobacillus_gasseri.t__SGB7038_group	M12	-3.11831	0.190969	2704.03	-16.3289	3.08e-57	1.71e-112	1.38e-111	Mixed
Clostridium_innocuum.t__SGB4037_group	M1	0.124275	0.174652	2560.4	0.711562	0.476801	3.4e-100	2.55e-99	Mixed
Clostridium_innocuum.t__SGB4037_group	M2	0.242979	0.172228	2561.98	1.4108	0.158426	3.4e-100	2.55e-99	Mixed
Clostridium_innocuum.t__SGB4037_group	M3	0.230313	0.170308	2595.24	1.35233	0.176386	3.4e-100	2.55e-99	Mixed
Clostridium_innocuum.t__SGB4037_group	M6	1.09567	0.191539	2692.72	5.72036	1.18e-08	3.4e-100	2.55e-99	Mixed
Clostridium_innocuum.t__SGB4037_group	M9	3.11641	0.196037	2698.84	15.8971	1.82e-54	3.4e-100	2.55e-99	Mixed
Clostridium_innocuum.t__SGB4037_group	M12	2.71951	0.195364	2766.32	13.9202	1.26e-42	3.4e-100	2.55e-99	Mixed
GGB4964_SGB6927.t__SGB6927	M1	0.621704	0.180744	2506.07	3.43969	0.000591901	1.81e-98	1.27e-97	Mixed
GGB4964_SGB6927.t__SGB6927	M2	-0.0347168	0.178244	2508.5	-0.194772	0.845587	1.81e-98	1.27e-97	Mixed
GGB4964_SGB6927.t__SGB6927	M3	-0.608107	0.176389	2544.71	-3.44754	0.00057491	1.81e-98	1.27e-97	Mixed
GGB4964_SGB6927.t__SGB6927	M6	-1.70924	0.198821	2641.39	-8.5969	1.38e-17	1.81e-98	1.27e-97	Mixed
GGB4964_SGB6927.t__SGB6927	M9	-2.28269	0.203516	2645.56	-11.2163	1.48e-28	1.81e-98	1.27e-97	Mixed
GGB4964_SGB6927.t__SGB6927	M12	-2.94828	0.203195	2722.54	-14.5096	5.25e-46	1.81e-98	1.27e-97	Mixed
Actinomyces_urogenitalis.t__SGB15868	M1	0.181002	0.163359	2509.81	1.108	0.267967	1.14e-96	7.48e-96	Mixed
Actinomyces_urogenitalis.t__SGB15868	M2	0.268427	0.161113	2512.78	1.66608	0.0958221	1.14e-96	7.48e-96	Mixed
Actinomyces_urogenitalis.t__SGB15868	M3	0.31908	0.159616	2546.33	1.99905	0.0457089	1.14e-96	7.48e-96	Mixed
Actinomyces_urogenitalis.t__SGB15868	M6	-0.68125	0.180443	2623.54	-3.77543	0.000163272	1.14e-96	7.48e-96	Mixed
Actinomyces_urogenitalis.t__SGB15868	M9	-1.82661	0.18472	2624.73	-9.88853	1.16e-22	1.14e-96	7.48e-96	Mixed
Actinomyces_urogenitalis.t__SGB15868	M12	-2.70601	0.184946	2698.61	-14.6314	1.04e-46	1.14e-96	7.48e-96	Mixed
Streptococcus_sp_IMAU_99161.t__SGB8065	M1	-0.0327597	0.15928	2582.88	-0.205674	0.837061	4.09e-89	2.53e-88	Mixed
Streptococcus_sp_IMAU_99161.t__SGB8065	M2	0.222212	0.15707	2584.48	1.41473	0.157268	4.09e-89	2.53e-88	Mixed
Streptococcus_sp_IMAU_99161.t__SGB8065	M3	0.875188	0.155337	2615.89	5.63412	1.95e-08	4.09e-89	2.53e-88	Mixed
Streptococcus_sp_IMAU_99161.t__SGB8065	M6	1.74161	0.174766	2706.23	9.96538	5.35e-23	4.09e-89	2.53e-88	Mixed
Streptococcus_sp_IMAU_99161.t__SGB8065	M9	-0.443828	0.178875	2711.6	-2.48122	0.0131534	4.09e-89	2.53e-88	Mixed
Streptococcus_sp_IMAU_99161.t__SGB8065	M12	-1.52411	0.178314	2775.21	-8.54737	2.05e-17	4.09e-89	2.53e-88	Mixed
Clostridiaceae_bacterium.t__SGB4269	M1	-0.0271545	0.136406	2605.48	-0.199071	0.842223	3.87e-86	2.25e-85	Mixed
Clostridiaceae_bacterium.t__SGB4269	M2	-0.0716637	0.13451	2604.85	-0.532778	0.594233	3.87e-86	2.25e-85	Mixed
Clostridiaceae_bacterium.t__SGB4269	M3	-0.161875	0.132785	2635.21	-1.21908	0.222922	3.87e-86	2.25e-85	Mixed
Clostridiaceae_bacterium.t__SGB4269	M6	-0.181134	0.148439	2747.96	-1.22026	0.222471	3.87e-86	2.25e-85	Mixed
Clostridiaceae_bacterium.t__SGB4269	M9	0.648371	0.151836	2761.03	4.27022	2.02e-05	3.87e-86	2.25e-85	Mixed
Clostridiaceae_bacterium.t__SGB4269	M12	2.26737	0.150687	2816.89	15.0468	2.83e-49	3.87e-86	2.25e-85	Mixed
Roseburia_faecis.t__SGB4925	M1	0.0291183	0.168413	2613.71	0.172898	0.862745	4.08e-86	2.25e-85	Mixed
Roseburia_faecis.t__SGB4925	M2	-0.0177021	0.166071	2613.39	-0.106594	0.915119	4.08e-86	2.25e-85	Mixed
Roseburia_faecis.t__SGB4925	M3	-0.0579134	0.163971	2643.12	-0.353194	0.723971	4.08e-86	2.25e-85	Mixed
Roseburia_faecis.t__SGB4925	M6	-0.230213	0.183433	2750.36	-1.25502	0.209577	4.08e-86	2.25e-85	Mixed
Roseburia_faecis.t__SGB4925	M9	1.20258	0.187648	2762.07	6.4087	1.72e-10	4.08e-86	2.25e-85	Mixed
Roseburia_faecis.t__SGB4925	M12	2.81518	0.186311	2817.11	15.1102	1.16e-49	4.08e-86	2.25e-85	Mixed
Lachnospira_eligens.t__SGB5082_group	M1	-0.128767	0.157596	2641	-0.81707	0.413962	1.18e-84	6.17e-84	Mixed
Lachnospira_eligens.t__SGB5082_group	M2	-0.220709	0.155407	2639.75	-1.4202	0.155667	1.18e-84	6.17e-84	Mixed
Lachnospira_eligens.t__SGB5082_group	M3	-0.302186	0.153349	2666.99	-1.97058	0.0488754	1.18e-84	6.17e-84	Mixed
Lachnospira_eligens.t__SGB5082_group	M6	-0.37732	0.171121	2774.92	-2.20499	0.0275363	1.18e-84	6.17e-84	Mixed
Lachnospira_eligens.t__SGB5082_group	M9	0.645022	0.174993	2789.16	3.68599	0.000232155	1.18e-84	6.17e-84	Mixed
Lachnospira_eligens.t__SGB5082_group	M12	2.46305	0.173489	2837.58	14.1971	3.01e-44	1.18e-84	6.17e-84	Mixed
Clostridium_perfringens.t__SGB6191	M1	0.0486403	0.170524	2502.85	0.28524	0.775484	1.61e-82	8.05e-82	Mixed
Clostridium_perfringens.t__SGB6191	M2	-0.161963	0.168174	2505.7	-0.963071	0.335605	1.61e-82	8.05e-82	Mixed
Clostridium_perfringens.t__SGB6191	M3	-0.239466	0.166542	2540.71	-1.43787	0.150595	1.61e-82	8.05e-82	Mixed
Clostridium_perfringens.t__SGB6191	M6	-1.18744	0.18808	2625.86	-6.31348	3.19e-10	1.61e-82	8.05e-82	Mixed
Clostridium_perfringens.t__SGB6191	M9	-2.13257	0.192534	2628.02	-11.0763	6.7e-28	1.61e-82	8.05e-82	Mixed
Clostridium_perfringens.t__SGB6191	M12	-2.86519	0.19257	2704.32	-14.8787	3.47e-48	1.61e-82	8.05e-82	Mixed
Lacticaseibacillus_paracasei.t__SGB7142	M1	0.170194	0.156624	2531.94	1.08664	0.277299	3.39e-82	1.62e-81	Mixed
Lacticaseibacillus_paracasei.t__SGB7142	M2	0.662306	0.154455	2534.07	4.28802	1.87e-05	3.39e-82	1.62e-81	Mixed
Lacticaseibacillus_paracasei.t__SGB7142	M3	0.941451	0.152811	2568.81	6.1609	8.37e-10	3.39e-82	1.62e-81	Mixed
Lacticaseibacillus_paracasei.t__SGB7142	M6	0.386438	0.172125	2664.3	2.24511	0.024843	3.39e-82	1.62e-81	Mixed
Lacticaseibacillus_paracasei.t__SGB7142	M9	-1.01116	0.176183	2669.01	-5.73924	1.06e-08	3.39e-82	1.62e-81	Mixed
Lacticaseibacillus_paracasei.t__SGB7142	M12	-1.83879	0.1758	2741.64	-10.4596	3.91e-25	3.39e-82	1.62e-81	Mixed
Fusicatenibacter_saccharivorans.t__SGB4874	M1	-0.0504585	0.166362	2578.41	-0.303305	0.761682	5.35e-81	2.44e-80	Mixed
Fusicatenibacter_saccharivorans.t__SGB4874	M2	-0.125202	0.164049	2578.72	-0.763203	0.445412	5.35e-81	2.44e-80	Mixed
Fusicatenibacter_saccharivorans.t__SGB4874	M3	-0.147562	0.162045	2611.27	-0.910624	0.362578	5.35e-81	2.44e-80	Mixed
Fusicatenibacter_saccharivorans.t__SGB4874	M6	-0.16152	0.181583	2721.76	-0.889511	0.373807	5.35e-81	2.44e-80	Mixed
Fusicatenibacter_saccharivorans.t__SGB4874	M9	0.636767	0.18579	2732.22	3.42735	0.000618528	5.35e-81	2.44e-80	Mixed
Fusicatenibacter_saccharivorans.t__SGB4874	M12	2.71372	0.184665	2794.62	14.6953	3.79e-47	5.35e-81	2.44e-80	Mixed
Lacticaseibacillus_rhamnosus.t__SGB7144	M1	0.411048	0.225112	2518.8	1.82597	0.0679731	1.61e-78	7.04e-78	Mixed
Lacticaseibacillus_rhamnosus.t__SGB7144	M2	1.27017	0.22201	2521.57	5.72124	1.18e-08	1.61e-78	7.04e-78	Mixed
Lacticaseibacillus_rhamnosus.t__SGB7144	M3	1.71808	0.219856	2555.48	7.81457	7.99e-15	1.61e-78	7.04e-78	Mixed
Lacticaseibacillus_rhamnosus.t__SGB7144	M6	0.805049	0.24829	2637.81	3.24237	0.00120017	1.61e-78	7.04e-78	Mixed
Lacticaseibacillus_rhamnosus.t__SGB7144	M9	-1.09617	0.25417	2639.89	-4.31272	1.67e-05	1.61e-78	7.04e-78	Mixed
Lacticaseibacillus_rhamnosus.t__SGB7144	M12	-2.16151	0.25422	2713.51	-8.50253	3.02e-17	1.61e-78	7.04e-78	Mixed
Clostridium_sp_AF34_10BH.t__SGB4914	M1	-0.0489083	0.144406	2610.8	-0.338687	0.734873	1.89e-75	7.95e-75	Mixed
Clostridium_sp_AF34_10BH.t__SGB4914	M2	-0.105517	0.1424	2609.47	-0.740992	0.458765	1.89e-75	7.95e-75	Mixed
Clostridium_sp_AF34_10BH.t__SGB4914	M3	-0.221393	0.140517	2639.17	-1.57556	0.115246	1.89e-75	7.95e-75	Mixed
Clostridium_sp_AF34_10BH.t__SGB4914	M6	-0.439735	0.156814	2757.09	-2.80418	0.00507982	1.89e-75	7.95e-75	Mixed
Clostridium_sp_AF34_10BH.t__SGB4914	M9	-0.0334234	0.160365	2772.63	-0.208421	0.834915	1.89e-75	7.95e-75	Mixed
Clostridium_sp_AF34_10BH.t__SGB4914	M12	2.09162	0.158994	2826.12	13.1553	2.08e-38	1.89e-75	7.95e-75	Mixed
Roseburia_intestinalis.t__SGB4951	M1	0.0443315	0.155858	2633.45	0.284434	0.7761	2.31e-71	9.33e-71	Mixed
Roseburia_intestinalis.t__SGB4951	M2	-0.0497748	0.153693	2632.36	-0.323859	0.746071	2.31e-71	9.33e-71	Mixed
Roseburia_intestinalis.t__SGB4951	M3	-0.157329	0.151675	2660.29	-1.03728	0.2997	2.31e-71	9.33e-71	Mixed
Roseburia_intestinalis.t__SGB4951	M6	-0.287761	0.169334	2769.02	-1.69936	0.0893628	2.31e-71	9.33e-71	Mixed
Roseburia_intestinalis.t__SGB4951	M9	1.05027	0.173178	2782.89	6.06465	1.5e-09	2.31e-71	9.33e-71	Mixed
Roseburia_intestinalis.t__SGB4951	M12	2.2704	0.171737	2832.96	13.2202	9.21e-39	2.31e-71	9.33e-71	Mixed
Clostridium_sp_C5_48.t__SGB4752	M1	-0.0467218	0.188246	2582.97	-0.248196	0.804003	5.32e-71	2.07e-70	Mixed
Clostridium_sp_C5_48.t__SGB4752	M2	-0.0613345	0.185635	2584.58	-0.330404	0.741121	5.32e-71	2.07e-70	Mixed
Clostridium_sp_C5_48.t__SGB4752	M3	-0.102255	0.183589	2615.97	-0.556976	0.577591	5.32e-71	2.07e-70	Mixed
Clostridium_sp_C5_48.t__SGB4752	M6	0.411366	0.206559	2706.11	1.99152	0.0465245	5.32e-71	2.07e-70	Mixed
Clostridium_sp_C5_48.t__SGB4752	M9	2.42518	0.211416	2711.44	11.4712	8.85e-30	5.32e-71	2.07e-70	Mixed
Clostridium_sp_C5_48.t__SGB4752	M12	2.38652	0.210759	2775.04	11.3235	4.32e-29	5.32e-71	2.07e-70	Mixed
Eubacterium_rectale.t__SGB4933_group	M1	-0.00506784	0.168954	2601.55	-0.0299953	0.976073	8.63e-68	3.24e-67	Mixed
Eubacterium_rectale.t__SGB4933_group	M2	-0.0805339	0.166605	2601.07	-0.483382	0.628865	8.63e-68	3.24e-67	Mixed
Eubacterium_rectale.t__SGB4933_group	M3	-0.101487	0.164484	2631.77	-0.617001	0.537287	8.63e-68	3.24e-67	Mixed
Eubacterium_rectale.t__SGB4933_group	M6	-0.107736	0.183944	2744.2	-0.585696	0.558128	8.63e-68	3.24e-67	Mixed
Eubacterium_rectale.t__SGB4933_group	M9	0.856072	0.188163	2756.85	4.54964	5.61e-06	8.63e-68	3.24e-67	Mixed
Eubacterium_rectale.t__SGB4933_group	M12	2.52226	0.186783	2813.69	13.5037	2.61e-40	8.63e-68	3.24e-67	Mixed
Streptococcus_mitis.t__SGB8163	M1	-0.244722	0.202443	2546.78	-1.20884	0.226835	1.8e-64	6.52e-64	Mixed
Streptococcus_mitis.t__SGB8163	M2	-0.355596	0.199633	2548.24	-1.78125	0.0749902	1.8e-64	6.52e-64	Mixed
Streptococcus_mitis.t__SGB8163	M3	-0.0147066	0.197373	2582.7	-0.074512	0.940609	1.8e-64	6.52e-64	Mixed
Streptococcus_mitis.t__SGB8163	M6	-0.639883	0.221858	2686.26	-2.8842	0.00395534	1.8e-64	6.52e-64	Mixed
Streptococcus_mitis.t__SGB8163	M9	-2.12315	0.22706	2693.26	-9.3506	1.77e-20	1.8e-64	6.52e-64	Mixed
Streptococcus_mitis.t__SGB8163	M12	-3.06423	0.226186	2762.96	-13.5474	1.57e-40	1.8e-64	6.52e-64	Mixed
Roseburia_inulinivorans.t__SGB4940	M1	-0.0440547	0.148616	2629.3	-0.296433	0.766923	2.36e-60	8.25e-60	Mixed
Roseburia_inulinivorans.t__SGB4940	M2	-0.166919	0.146551	2628.25	-1.13899	0.254813	2.36e-60	8.25e-60	Mixed
Roseburia_inulinivorans.t__SGB4940	M3	-0.210491	0.14463	2656.54	-1.45537	0.145684	2.36e-60	8.25e-60	Mixed
Roseburia_inulinivorans.t__SGB4940	M6	-0.391673	0.161489	2766.21	-2.42538	0.0153561	2.36e-60	8.25e-60	Mixed
Roseburia_inulinivorans.t__SGB4940	M9	0.342743	0.165158	2780.08	2.07524	0.0380558	2.36e-60	8.25e-60	Mixed
Roseburia_inulinivorans.t__SGB4940	M12	1.9463	0.163795	2830.94	11.8825	8.22e-32	2.36e-60	8.25e-60	Mixed
Bifidobacterium_breve.t__SGB17247	M1	0.83357	0.290885	2462.43	2.86563	0.00419705	6.42e-58	2.18e-57	Mixed
Bifidobacterium_breve.t__SGB17247	M2	1.97745	0.286932	2465.74	6.89171	6.97e-12	6.42e-58	2.18e-57	Mixed
Bifidobacterium_breve.t__SGB17247	M3	2.5352	0.284725	2496.86	8.90403	1.01e-18	6.42e-58	2.18e-57	Mixed
Bifidobacterium_breve.t__SGB17247	M6	4.38291	0.322996	2554.99	13.5696	1.49e-40	6.42e-58	2.18e-57	Mixed
Bifidobacterium_breve.t__SGB17247	M9	4.22394	0.330649	2553.66	12.7747	2.86e-36	6.42e-58	2.18e-57	Mixed
Bifidobacterium_breve.t__SGB17247	M12	2.55616	0.332382	2625.25	7.69042	2.06e-14	6.42e-58	2.18e-57	Mixed
Klebsiella_grimontii.t__SGB10120	M1	0.221191	0.220911	2532.93	1.00126	0.316794	4.65e-56	1.53e-55	Mixed
Klebsiella_grimontii.t__SGB10120	M2	0.630704	0.21786	2535.4	2.89501	0.00382393	4.65e-56	1.53e-55	Mixed
Klebsiella_grimontii.t__SGB10120	M3	0.823423	0.21565	2569.22	3.81834	0.000137531	4.65e-56	1.53e-55	Mixed
Klebsiella_grimontii.t__SGB10120	M6	-0.121398	0.243253	2656.16	-0.499062	0.617777	4.65e-56	1.53e-55	Mixed
Klebsiella_grimontii.t__SGB10120	M9	-1.65972	0.249005	2659.32	-6.66543	3.2e-11	4.65e-56	1.53e-55	Mixed
Klebsiella_grimontii.t__SGB10120	M12	-2.29426	0.248777	2731.38	-9.22216	5.66e-20	4.65e-56	1.53e-55	Mixed
Klebsiella_michiganensis.t__SGB10119	M1	0.831093	0.243229	2520.01	3.41691	0.00064341	2.98e-53	9.47e-53	Mixed
Klebsiella_michiganensis.t__SGB10119	M2	1.05623	0.239876	2522.75	4.40323	1.11e-05	2.98e-53	9.47e-53	Mixed
Klebsiella_michiganensis.t__SGB10119	M3	1.3913	0.237534	2556.72	5.85726	5.31e-09	2.98e-53	9.47e-53	Mixed
Klebsiella_michiganensis.t__SGB10119	M6	0.785537	0.268211	2639.86	2.92881	0.00343181	2.98e-53	9.47e-53	Mixed
Klebsiella_michiganensis.t__SGB10119	M9	-0.931203	0.274561	2642.09	-3.3916	0.00070507	2.98e-53	9.47e-53	Mixed
Klebsiella_michiganensis.t__SGB10119	M12	-2.01583	0.274572	2715.66	-7.34174	2.77e-13	2.98e-53	9.47e-53	Mixed
Enterococcus_avium.t__SGB7931	M1	0.00962902	0.14394	2600.47	0.0668961	0.94667	8.64e-52	2.67e-51	Mixed
Enterococcus_avium.t__SGB7931	M2	0.130769	0.14194	2601.49	0.921295	0.356982	8.64e-52	2.67e-51	Mixed
Enterococcus_avium.t__SGB7931	M3	0.34561	0.140295	2632.01	2.46345	0.0138241	8.64e-52	2.67e-51	Mixed
Enterococcus_avium.t__SGB7931	M6	1.27273	0.157558	2726.49	8.07786	9.79e-16	8.64e-52	2.67e-51	Mixed
Enterococcus_avium.t__SGB7931	M9	0.725996	0.161241	2733.58	4.50255	7e-06	8.64e-52	2.67e-51	Mixed
Enterococcus_avium.t__SGB7931	M12	-0.961106	0.160513	2793.45	-5.98774	2.4e-09	8.64e-52	2.67e-51	Mixed
Lacrimispora_amygdalina.t__SGB4716	M1	-0.046573	0.135901	2598.77	-0.342698	0.731853	2.41e-51	7.24e-51	Mixed
Lacrimispora_amygdalina.t__SGB4716	M2	-0.139018	0.134011	2598.16	-1.03736	0.299664	2.41e-51	7.24e-51	Mixed
Lacrimispora_amygdalina.t__SGB4716	M3	-0.235195	0.132295	2629.06	-1.77781	0.0755502	2.41e-51	7.24e-51	Mixed
Lacrimispora_amygdalina.t__SGB4716	M6	-0.436903	0.147899	2743.7	-2.95406	0.00316293	2.41e-51	7.24e-51	Mixed
Lacrimispora_amygdalina.t__SGB4716	M9	0.0369324	0.151285	2756.94	0.244125	0.807152	2.41e-51	7.24e-51	Mixed
Lacrimispora_amygdalina.t__SGB4716	M12	1.57095	0.150146	2813.98	10.4628	3.68e-25	2.41e-51	7.24e-51	Mixed
Enterococcus_casseliflavus.t__SGB7952	M1	0.287911	0.153384	2555.62	1.87705	0.0606246	1.99e-50	5.8e-50	Mixed
Enterococcus_casseliflavus.t__SGB7952	M2	0.42763	0.151263	2557.86	2.82705	0.00473435	1.99e-50	5.8e-50	Mixed
Enterococcus_casseliflavus.t__SGB7952	M3	0.547915	0.1497	2590.38	3.66008	0.000257173	1.99e-50	5.8e-50	Mixed
Enterococcus_casseliflavus.t__SGB7952	M6	0.748857	0.168773	2675.87	4.43708	9.49e-06	1.99e-50	5.8e-50	Mixed
Enterococcus_casseliflavus.t__SGB7952	M9	-0.271311	0.172759	2679.38	-1.57046	0.116427	1.99e-50	5.8e-50	Mixed
Enterococcus_casseliflavus.t__SGB7952	M12	-1.48449	0.172519	2747.73	-8.60479	1.26e-17	1.99e-50	5.8e-50	Mixed
Veillonella_parvula.t__SGB6939	M1	0.522314	0.298212	2528.82	1.75149	0.0799832	2.36e-47	6.69e-47	Mixed
Veillonella_parvula.t__SGB6939	M2	1.29186	0.294092	2531.31	4.39271	1.17e-05	2.36e-47	6.69e-47	Mixed
Veillonella_parvula.t__SGB6939	M3	2.27496	0.291113	2565.41	7.81471	7.97e-15	2.36e-47	6.69e-47	Mixed
Veillonella_parvula.t__SGB6939	M6	2.54137	0.328387	2652.93	7.73895	1.41e-14	2.36e-47	6.69e-47	Mixed
Veillonella_parvula.t__SGB6939	M9	0.874359	0.336152	2656.08	2.60108	0.00934465	2.36e-47	6.69e-47	Mixed
Veillonella_parvula.t__SGB6939	M12	-1.33341	0.335855	2728.84	-3.9702	7.37e-05	2.36e-47	6.69e-47	Mixed
Escherichia_coli.t__SGB10068	M1	1.08944	0.279152	2471.36	3.90268	9.77e-05	1.25e-43	3.44e-43	Mixed
Escherichia_coli.t__SGB10068	M2	1.7761	0.275333	2474.68	6.45074	1.33e-10	1.25e-43	3.44e-43	Mixed
Escherichia_coli.t__SGB10068	M3	2.38148	0.272971	2508.57	8.72431	4.79e-18	1.25e-43	3.44e-43	Mixed
Escherichia_coli.t__SGB10068	M6	3.40244	0.309094	2579.82	11.0078	1.42e-27	1.25e-43	3.44e-43	Mixed
Escherichia_coli.t__SGB10068	M9	2.17208	0.316425	2579.71	6.86446	8.33e-12	1.25e-43	3.44e-43	Mixed
Escherichia_coli.t__SGB10068	M12	0.157798	0.317376	2656.34	0.497195	0.619093	1.25e-43	3.44e-43	Mixed
Faecalibacterium_prausnitzii.t__SGB15342	M1	-0.0037708	0.14898	2639.25	-0.0253108	0.979809	2.06e-43	5.56e-43	Mixed
Faecalibacterium_prausnitzii.t__SGB15342	M2	-0.164647	0.146911	2637.87	-1.12073	0.262506	2.06e-43	5.56e-43	Mixed
Faecalibacterium_prausnitzii.t__SGB15342	M3	-0.20963	0.144956	2665.2	-1.44616	0.14825	2.06e-43	5.56e-43	Mixed
Faecalibacterium_prausnitzii.t__SGB15342	M6	-0.485585	0.161709	2774.79	-3.00283	0.0026987	2.06e-43	5.56e-43	Mixed
Faecalibacterium_prausnitzii.t__SGB15342	M9	-0.0375874	0.165361	2789.55	-0.227305	0.820203	2.06e-43	5.56e-43	Mixed
Faecalibacterium_prausnitzii.t__SGB15342	M12	1.56134	0.163914	2838.02	9.52535	3.4e-21	2.06e-43	5.56e-43	Mixed
Bifidobacterium_catenulatum.t__SGB17241	M1	-0.0974763	0.244206	2480.39	-0.399157	0.689812	2.4e-40	6.29e-40	Mixed
Bifidobacterium_catenulatum.t__SGB17241	M2	0.470404	0.240879	2483.64	1.95287	0.0509475	2.4e-40	6.29e-40	Mixed
Bifidobacterium_catenulatum.t__SGB17241	M3	0.67861	0.23895	2515.01	2.83997	0.00454807	2.4e-40	6.29e-40	Mixed
Bifidobacterium_catenulatum.t__SGB17241	M6	1.61904	0.270897	2576.04	5.97659	2.59e-09	2.4e-40	6.29e-40	Mixed
Bifidobacterium_catenulatum.t__SGB17241	M9	2.62052	0.277319	2575.11	9.44949	7.38e-21	2.4e-40	6.29e-40	Mixed
Bifidobacterium_catenulatum.t__SGB17241	M12	2.73821	0.278551	2646.66	9.83019	2.01e-22	2.4e-40	6.29e-40	Mixed
Roseburia_hominis.t__SGB4936	M1	-0.0320168	0.134694	2589.63	-0.237701	0.812132	5.89e-38	1.51e-37	Mixed
Roseburia_hominis.t__SGB4936	M2	-0.0235045	0.13282	2589.31	-0.176964	0.85955	5.89e-38	1.51e-37	Mixed
Roseburia_hominis.t__SGB4936	M3	-0.153253	0.131143	2620.98	-1.16859	0.242674	5.89e-38	1.51e-37	Mixed
Roseburia_hominis.t__SGB4936	M6	-0.498767	0.14672	2735.31	-3.39944	0.000684909	5.89e-38	1.51e-37	Mixed
Roseburia_hominis.t__SGB4936	M9	-0.296211	0.150093	2747.76	-1.97353	0.0485358	5.89e-38	1.51e-37	Mixed
Roseburia_hominis.t__SGB4936	M12	1.23518	0.14903	2806.98	8.28813	1.76e-16	5.89e-38	1.51e-37	Mixed
Odoribacter_splanchnicus.t__SGB1790	M1	0.128869	0.114841	2502.65	1.12215	0.261908	9.96e-37	2.49e-36	Mixed
Odoribacter_splanchnicus.t__SGB1790	M2	0.126238	0.113267	2505.77	1.11451	0.265166	9.96e-37	2.49e-36	Mixed
Odoribacter_splanchnicus.t__SGB1790	M3	0.145948	0.11227	2538.45	1.29998	0.193725	9.96e-37	2.49e-36	Mixed
Odoribacter_splanchnicus.t__SGB1790	M6	-0.389085	0.127062	2609.09	-3.06218	0.00221975	9.96e-37	2.49e-36	Mixed
Odoribacter_splanchnicus.t__SGB1790	M9	-1.1032	0.130075	2609.36	-8.48125	3.67e-17	9.96e-37	2.49e-36	Mixed
Odoribacter_splanchnicus.t__SGB1790	M12	-0.820139	0.130391	2682.38	-6.28985	3.7e-10	9.96e-37	2.49e-36	Mixed
Clostridium_paraputrificum.t__SGB6187	M1	0.127575	0.169164	2553.68	0.754151	0.450828	2.69e-36	6.58e-36	Mixed
Clostridium_paraputrificum.t__SGB6187	M2	0.257552	0.166815	2555.05	1.54394	0.122728	2.69e-36	6.58e-36	Mixed
Clostridium_paraputrificum.t__SGB6187	M3	0.226825	0.164917	2589.05	1.37539	0.16913	2.69e-36	6.58e-36	Mixed
Clostridium_paraputrificum.t__SGB6187	M6	0.930927	0.185341	2691.9	5.02277	5.43e-07	2.69e-36	6.58e-36	Mixed
Clostridium_paraputrificum.t__SGB6187	M9	0.0109809	0.189684	2699.02	0.0578906	0.95384	2.69e-36	6.58e-36	Mixed
Clostridium_paraputrificum.t__SGB6187	M12	-1.38433	0.188928	2767.44	-7.3273	3.07e-13	2.69e-36	6.58e-36	Mixed
Clostridium_neonatale.t__SGB6169	M1	0.5014	0.199006	2561.19	2.51952	0.0118118	2.48e-35	5.91e-35	Mixed
Clostridium_neonatale.t__SGB6169	M2	0.606109	0.196239	2561.72	3.08863	0.00203239	2.48e-35	5.91e-35	Mixed
Clostridium_neonatale.t__SGB6169	M3	0.810884	0.193871	2595.57	4.18259	2.98e-05	2.48e-35	5.91e-35	Mixed
Clostridium_neonatale.t__SGB6169	M6	1.42364	0.217366	2708.31	6.54951	6.88e-11	2.48e-35	5.91e-35	Mixed
Clostridium_neonatale.t__SGB6169	M9	2.01808	0.222414	2718.46	9.07352	2.15e-19	2.48e-35	5.91e-35	Mixed
Clostridium_neonatale.t__SGB6169	M12	-0.327834	0.221149	2784.24	-1.48241	0.138345	2.48e-35	5.91e-35	Mixed
Limosilactobacillus_fermentum.t__SGB7106	M1	-0.060553	0.14983	2564.08	-0.404146	0.686139	1.6e-33	3.74e-33	Mixed
Limosilactobacillus_fermentum.t__SGB7106	M2	-0.270197	0.147748	2565.22	-1.82877	0.0675506	1.6e-33	3.74e-33	Mixed
Limosilactobacillus_fermentum.t__SGB7106	M3	-0.349471	0.146039	2598.58	-2.39299	0.0167822	1.6e-33	3.74e-33	Mixed
Limosilactobacillus_fermentum.t__SGB7106	M6	-0.400172	0.164022	2702.02	-2.43974	0.0147618	1.6e-33	3.74e-33	Mixed
Limosilactobacillus_fermentum.t__SGB7106	M9	-0.540807	0.167858	2709.74	-3.22182	0.00128889	1.6e-33	3.74e-33	Mixed
Limosilactobacillus_fermentum.t__SGB7106	M12	-1.83466	0.167109	2776.05	-10.9788	1.76e-27	1.6e-33	3.74e-33	Mixed
Eggerthella_lenta.t__SGB14809	M1	0.252909	0.218973	2538.12	1.15498	0.248209	9.75e-33	2.23e-32	Mixed
Eggerthella_lenta.t__SGB14809	M2	1.17111	0.215954	2540.75	5.42298	6.41e-08	9.75e-33	2.23e-32	Mixed
Eggerthella_lenta.t__SGB14809	M3	1.80423	0.213844	2573.48	8.43713	5.35e-17	9.75e-33	2.23e-32	Mixed
Eggerthella_lenta.t__SGB14809	M6	2.10265	0.241457	2653.5	8.70819	5.33e-18	9.75e-33	2.23e-32	Mixed
Eggerthella_lenta.t__SGB14809	M9	2.11945	0.247174	2655.66	8.57474	1.66e-17	9.75e-33	2.23e-32	Mixed
Eggerthella_lenta.t__SGB14809	M12	1.93711	0.247178	2726.19	7.83687	6.57e-15	9.75e-33	2.23e-32	Mixed
Agathobaculum_butyriciproducens.t__SGB14993_group	M1	-0.0405939	0.124902	2594.88	-0.325006	0.745202	3.1e-32	6.92e-32	Mixed
Agathobaculum_butyriciproducens.t__SGB14993_group	M2	-0.12663	0.123165	2594.43	-1.02813	0.303983	3.1e-32	6.92e-32	Mixed
Agathobaculum_butyriciproducens.t__SGB14993_group	M3	-0.180928	0.1216	2625.67	-1.4879	0.136898	3.1e-32	6.92e-32	Mixed
Agathobaculum_butyriciproducens.t__SGB14993_group	M6	-0.524184	0.136	2739.76	-3.8543	0.000118727	3.1e-32	6.92e-32	Mixed
Agathobaculum_butyriciproducens.t__SGB14993_group	M9	-0.0381434	0.13912	2752.51	-0.274176	0.78397	3.1e-32	6.92e-32	Mixed
Agathobaculum_butyriciproducens.t__SGB14993_group	M12	1.04059	0.138108	2810.56	7.5346	6.56e-14	3.1e-32	6.92e-32	Mixed
Bilophila_wadsworthia.t__SGB15452	M1	0.197344	0.160788	2477.31	1.22735	0.219807	2.79e-30	6.11e-30	Mixed
Bilophila_wadsworthia.t__SGB15452	M2	0.273469	0.158604	2480.53	1.72423	0.0847916	2.79e-30	6.11e-30	Mixed
Bilophila_wadsworthia.t__SGB15452	M3	0.133558	0.157394	2510.61	0.848557	0.396208	2.79e-30	6.11e-30	Mixed
Bilophila_wadsworthia.t__SGB15452	M6	-0.541575	0.17857	2566.27	-3.03284	0.0024469	2.79e-30	6.11e-30	Mixed
Bilophila_wadsworthia.t__SGB15452	M9	-1.25014	0.182801	2564.91	-6.83883	9.95e-12	2.79e-30	6.11e-30	Mixed
Bilophila_wadsworthia.t__SGB15452	M12	-1.18868	0.183787	2633.97	-6.46771	1.18e-10	2.79e-30	6.11e-30	Mixed
Citrobacter_freundii.t__SGB10083_group	M1	0.519635	0.218179	2550.86	2.3817	0.017306	5.31e-30	1.14e-29	Mixed
Citrobacter_freundii.t__SGB10083_group	M2	0.67661	0.215155	2552.75	3.14476	0.00168135	5.31e-30	1.14e-29	Mixed
Citrobacter_freundii.t__SGB10083_group	M3	0.958808	0.212821	2586.37	4.50523	6.92e-06	5.31e-30	1.14e-29	Mixed
Citrobacter_freundii.t__SGB10083_group	M6	0.604072	0.239579	2681.04	2.52139	0.0117466	5.31e-30	1.14e-29	Mixed
Citrobacter_freundii.t__SGB10083_group	M9	-0.376749	0.245219	2686.19	-1.53637	0.124565	5.31e-30	1.14e-29	Mixed
Citrobacter_freundii.t__SGB10083_group	M12	-1.43106	0.244565	2755.52	-5.85144	5.45e-09	5.31e-30	1.14e-29	Mixed
Veillonella_ratti.t__SGB6922	M1	0.0545621	0.202967	2534.78	0.268822	0.788088	1.12e-29	2.35e-29	Mixed
Veillonella_ratti.t__SGB6922	M2	0.0992937	0.200183	2537.68	0.496015	0.619927	1.12e-29	2.35e-29	Mixed
Veillonella_ratti.t__SGB6922	M3	0.164246	0.198388	2568.73	0.827902	0.407803	1.12e-29	2.35e-29	Mixed
Veillonella_ratti.t__SGB6922	M6	1.83782	0.224448	2637	8.18818	4.08e-16	1.12e-29	2.35e-29	Mixed
Veillonella_ratti.t__SGB6922	M9	1.66558	0.22977	2637.52	7.2489	5.49e-13	1.12e-29	2.35e-29	Mixed
Veillonella_ratti.t__SGB6922	M12	0.984463	0.230239	2706.11	4.27583	1.97e-05	1.12e-29	2.35e-29	Mixed
Clostridium_SGB6179.t__SGB6179	M1	-0.193838	0.13855	2634.19	-1.39904	0.161918	4.14e-29	8.52e-29	Mixed
Clostridium_SGB6179.t__SGB6179	M2	-0.237848	0.136626	2632.85	-1.74087	0.0818237	4.14e-29	8.52e-29	Mixed
Clostridium_SGB6179.t__SGB6179	M3	-0.279936	0.134812	2660.61	-2.07649	0.037944	4.14e-29	8.52e-29	Mixed
Clostridium_SGB6179.t__SGB6179	M6	-0.143283	0.150411	2771.48	-0.952604	0.340874	4.14e-29	8.52e-29	Mixed
Clostridium_SGB6179.t__SGB6179	M9	1.11258	0.153811	2786.3	7.23338	6.06e-13	4.14e-29	8.52e-29	Mixed
Clostridium_SGB6179.t__SGB6179	M12	0.621231	0.152476	2835.7	4.07429	4.74e-05	4.14e-29	8.52e-29	Mixed
Klebsiella_pneumoniae.t__SGB10115	M1	0.512138	0.267	2514.01	1.91812	0.055209	2.34e-28	4.72e-28	Mixed
Klebsiella_pneumoniae.t__SGB10115	M2	0.745023	0.26332	2516.8	2.82934	0.00470131	2.34e-28	4.72e-28	Mixed
Klebsiella_pneumoniae.t__SGB10115	M3	0.992797	0.26076	2551.09	3.80732	0.000143791	2.34e-28	4.72e-28	Mixed
Klebsiella_pneumoniae.t__SGB10115	M6	1.56708	0.294468	2634.61	5.32173	1.11e-07	2.34e-28	4.72e-28	Mixed
Klebsiella_pneumoniae.t__SGB10115	M9	0.230946	0.301441	2636.77	0.766142	0.443661	2.34e-28	4.72e-28	Mixed
Klebsiella_pneumoniae.t__SGB10115	M12	-1.48561	0.301483	2711.25	-4.92768	8.82e-07	2.34e-28	4.72e-28	Mixed
Bifidobacterium_bifidum.t__SGB17256	M1	0.294552	0.277552	2435.28	1.06125	0.288682	8.58e-28	1.7e-27	Mixed
Bifidobacterium_bifidum.t__SGB17256	M2	1.1329	0.273807	2438.43	4.13758	3.63e-05	8.58e-28	1.7e-27	Mixed
Bifidobacterium_bifidum.t__SGB17256	M3	1.61164	0.271954	2466.76	5.92614	3.53e-09	8.58e-28	1.7e-27	Mixed
Bifidobacterium_bifidum.t__SGB17256	M6	2.86497	0.309023	2513.58	9.27106	3.84e-20	8.58e-28	1.7e-27	Mixed
Bifidobacterium_bifidum.t__SGB17256	M9	2.09595	0.316326	2511.45	6.62592	4.21e-11	8.58e-28	1.7e-27	Mixed
Bifidobacterium_bifidum.t__SGB17256	M12	0.834693	0.318712	2577.51	2.61896	0.0088715	8.58e-28	1.7e-27	Mixed
Parabacteroides_merdae.t__SGB1949	M1	0.259995	0.158836	2430.68	1.63688	0.101786	4.61e-27	8.96e-27	Mixed
Parabacteroides_merdae.t__SGB1949	M2	0.0758622	0.156703	2433.57	0.484115	0.628348	4.61e-27	8.96e-27	Mixed
Parabacteroides_merdae.t__SGB1949	M3	-0.0543261	0.15573	2459.2	-0.348848	0.727233	4.61e-27	8.96e-27	Mixed
Parabacteroides_merdae.t__SGB1949	M6	-0.493894	0.177118	2498.5	-2.7885	0.00533536	4.61e-27	8.96e-27	Mixed
Parabacteroides_merdae.t__SGB1949	M9	-1.20535	0.181296	2496.14	-6.64856	3.62e-11	4.61e-27	8.96e-27	Mixed
Parabacteroides_merdae.t__SGB1949	M12	-1.26565	0.182915	2556.1	-6.91935	5.71e-12	4.61e-27	8.96e-27	Mixed
Streptococcus_parasanguinis.t__SGB8071	M1	-0.609921	0.223476	2521.57	-2.72925	0.00639202	4.71e-26	8.99e-26	Mixed
Streptococcus_parasanguinis.t__SGB8071	M2	-0.509484	0.220379	2523.62	-2.31185	0.020866	4.71e-26	8.99e-26	Mixed
Streptococcus_parasanguinis.t__SGB8071	M3	-0.59041	0.218001	2559.33	-2.70829	0.00680812	4.71e-26	8.99e-26	Mixed
Streptococcus_parasanguinis.t__SGB8071	M6	-1.25296	0.245451	2659.5	-5.10474	3.55e-07	4.71e-26	8.99e-26	Mixed
Streptococcus_parasanguinis.t__SGB8071	M9	-1.42659	0.251232	2664.83	-5.67839	1.51e-08	4.71e-26	8.99e-26	Mixed
Streptococcus_parasanguinis.t__SGB8071	M12	-2.59833	0.250596	2739.28	-10.3686	9.82e-25	4.71e-26	8.99e-26	Mixed
Enterocloster_bolteae.t__SGB4758_group	M1	0.00815518	0.166204	2544.09	0.0490673	0.960869	6.13e-24	1.15e-23	Mixed
Enterocloster_bolteae.t__SGB4758_group	M2	-0.0551642	0.16391	2546.6	-0.336552	0.736482	6.13e-24	1.15e-23	Mixed
Enterocloster_bolteae.t__SGB4758_group	M3	-0.00376018	0.162278	2579.28	-0.0231713	0.981515	6.13e-24	1.15e-23	Mixed
Enterocloster_bolteae.t__SGB4758_group	M6	-0.0134257	0.183141	2661.14	-0.0733077	0.941567	6.13e-24	1.15e-23	Mixed
Enterocloster_bolteae.t__SGB4758_group	M9	0.729676	0.187475	2663.73	3.89213	0.000101806	6.13e-24	1.15e-23	Mixed
Enterocloster_bolteae.t__SGB4758_group	M12	1.49298	0.18739	2733.6	7.96723	2.36e-15	6.13e-24	1.15e-23	Mixed
Alistipes_shahii.t__SGB2295	M1	-0.0411191	0.125772	2543.91	-0.326933	0.743746	9.92e-24	1.83e-23	Mixed
Alistipes_shahii.t__SGB2295	M2	-0.173351	0.124026	2545.38	-1.3977	0.162326	9.92e-24	1.83e-23	Mixed
Alistipes_shahii.t__SGB2295	M3	-0.216985	0.122623	2580.06	-1.76954	0.0769225	9.92e-24	1.83e-23	Mixed
Alistipes_shahii.t__SGB2295	M6	-0.647459	0.137836	2684.26	-4.69732	2.77e-06	9.92e-24	1.83e-23	Mixed
Alistipes_shahii.t__SGB2295	M9	-1.16999	0.141068	2691.31	-8.29386	1.71e-16	9.92e-24	1.83e-23	Mixed
Alistipes_shahii.t__SGB2295	M12	-0.925325	0.140526	2761.51	-6.58474	5.43e-11	9.92e-24	1.83e-23	Mixed
Veillonella_rogosae.t__SGB6956	M1	-0.289645	0.145231	2575.36	-1.99438	0.0462163	1.13e-23	2.05e-23	Mixed
Veillonella_rogosae.t__SGB6956	M2	-0.389068	0.143211	2575.88	-2.71674	0.00663697	1.13e-23	2.05e-23	Mixed
Veillonella_rogosae.t__SGB6956	M3	-0.445748	0.141484	2608.62	-3.15052	0.00164827	1.13e-23	2.05e-23	Mixed
Veillonella_rogosae.t__SGB6956	M6	0.0954917	0.158631	2717.41	0.601973	0.547242	1.13e-23	2.05e-23	Mixed
Veillonella_rogosae.t__SGB6956	M9	0.763075	0.162315	2727.18	4.70119	2.72e-06	1.13e-23	2.05e-23	Mixed
Veillonella_rogosae.t__SGB6956	M12	0.710779	0.161393	2790.49	4.40403	1.1e-05	1.13e-23	2.05e-23	Mixed
Bifidobacterium_dentium.t__SGB17234	M1	0.63966	0.254909	2531.27	2.50936	0.0121568	1.38e-23	2.45e-23	Mixed
Bifidobacterium_dentium.t__SGB17234	M2	0.961509	0.251397	2533.99	3.82467	0.00013411	1.38e-23	2.45e-23	Mixed
Bifidobacterium_dentium.t__SGB17234	M3	0.809249	0.248968	2566.96	3.25041	0.00116728	1.38e-23	2.45e-23	Mixed
Bifidobacterium_dentium.t__SGB17234	M6	0.741298	0.281196	2646.46	2.63624	0.00843212	1.38e-23	2.45e-23	Mixed
Bifidobacterium_dentium.t__SGB17234	M9	0.265948	0.287856	2648.39	0.923893	0.355626	1.38e-23	2.45e-23	Mixed
Bifidobacterium_dentium.t__SGB17234	M12	-1.49509	0.287941	2719.82	-5.19234	2.23e-07	1.38e-23	2.45e-23	Mixed
Bifidobacterium_pseudocatenulatum.t__SGB17237	M1	-0.0110487	0.18895	2465.34	-0.058474	0.953376	1.16e-22	2.03e-22	Mixed
Bifidobacterium_pseudocatenulatum.t__SGB17237	M2	0.140249	0.186394	2468.46	0.752432	0.451863	1.16e-22	2.03e-22	Mixed
Bifidobacterium_pseudocatenulatum.t__SGB17237	M3	0.038034	0.185073	2496.87	0.205508	0.837192	1.16e-22	2.03e-22	Mixed
Bifidobacterium_pseudocatenulatum.t__SGB17237	M6	-0.818715	0.210183	2545.79	-3.89524	0.000100627	1.16e-22	2.03e-22	Mixed
Bifidobacterium_pseudocatenulatum.t__SGB17237	M9	-0.944278	0.215156	2543.95	-4.3888	1.19e-05	1.16e-22	2.03e-22	Mixed
Bifidobacterium_pseudocatenulatum.t__SGB17237	M12	-1.61657	0.216608	2609.72	-7.46311	1.14e-13	1.16e-22	2.03e-22	Mixed
Bifidobacterium_longum.t__SGB17248	M1	0.536805	0.255968	2475.76	2.09715	0.0360813	2.75e-22	4.73e-22	Mixed
Bifidobacterium_longum.t__SGB17248	M2	1.02001	0.252466	2479.06	4.04021	5.5e-05	2.75e-22	4.73e-22	Mixed
Bifidobacterium_longum.t__SGB17248	M3	1.5594	0.250295	2512.74	6.23024	5.44e-10	2.75e-22	4.73e-22	Mixed
Bifidobacterium_longum.t__SGB17248	M6	1.90852	0.283407	2583.68	6.73419	2.02e-11	2.75e-22	4.73e-22	Mixed
Bifidobacterium_longum.t__SGB17248	M9	1.16583	0.290129	2583.6	4.01834	6.03e-05	2.75e-22	4.73e-22	Mixed
Bifidobacterium_longum.t__SGB17248	M12	-0.254013	0.290989	2659.66	-0.872932	0.382779	2.75e-22	4.73e-22	Mixed
Haemophilus_parainfluenzae.t__SGB9712_group	M1	-0.261226	0.265007	2523.96	-0.985729	0.324361	1.74e-21	2.95e-21	Mixed
Haemophilus_parainfluenzae.t__SGB9712_group	M2	-0.968202	0.261345	2526.44	-3.70468	0.000216196	1.74e-21	2.95e-21	Mixed
Haemophilus_parainfluenzae.t__SGB9712_group	M3	-0.802771	0.258682	2561	-3.10332	0.00193453	1.74e-21	2.95e-21	Mixed
Haemophilus_parainfluenzae.t__SGB9712_group	M6	0.11477	0.291754	2650.48	0.393381	0.69407	1.74e-21	2.95e-21	Mixed
Haemophilus_parainfluenzae.t__SGB9712_group	M9	1.22903	0.298651	2653.85	4.11528	3.98e-05	1.74e-21	2.95e-21	Mixed
Haemophilus_parainfluenzae.t__SGB9712_group	M12	1.13336	0.298341	2727.52	3.79889	0.00014852	1.74e-21	2.95e-21	Mixed
Veillonella_atypica.t__SGB6936	M1	0.0289627	0.278648	2546.77	0.10394	0.917225	5.51e-21	9.18e-21	Mixed
Veillonella_atypica.t__SGB6936	M2	-0.921877	0.274786	2548.69	-3.35489	0.000805603	5.51e-21	9.18e-21	Mixed
Veillonella_atypica.t__SGB6936	M3	-1.44945	0.271811	2582.6	-5.33256	1.05e-07	5.51e-21	9.18e-21	Mixed
Veillonella_atypica.t__SGB6936	M6	-1.48821	0.306	2677.89	-4.86343	1.22e-06	5.51e-21	9.18e-21	Mixed
Veillonella_atypica.t__SGB6936	M9	0.346744	0.313206	2683.04	1.10708	0.268359	5.51e-21	9.18e-21	Mixed
Veillonella_atypica.t__SGB6936	M12	-1.60459	0.312384	2753.09	-5.1366	2.99e-07	5.51e-21	9.18e-21	Mixed
Enterocloster_aldensis.t__SGB4762	M1	-0.124904	0.146837	2571.94	-0.850628	0.395055	1.98e-20	3.24e-20	Mixed
Enterocloster_aldensis.t__SGB4762	M2	-0.137344	0.144799	2573.4	-0.948515	0.342957	1.98e-20	3.24e-20	Mixed
Enterocloster_aldensis.t__SGB4762	M3	-0.198204	0.143171	2605.86	-1.38438	0.16636	1.98e-20	3.24e-20	Mixed
Enterocloster_aldensis.t__SGB4762	M6	-0.258135	0.160974	2702.02	-1.60358	0.108923	1.98e-20	3.24e-20	Mixed
Enterocloster_aldensis.t__SGB4762	M9	0.203201	0.164751	2708.29	1.23338	0.21754	1.98e-20	3.24e-20	Mixed
Enterocloster_aldensis.t__SGB4762	M12	1.08377	0.16415	2773.66	6.6023	4.83e-11	1.98e-20	3.24e-20	Mixed
Tyzzerella_nexilis.t__SGB4588_group	M1	0.00953076	0.157239	2590.45	0.0606131	0.951672	2.46e-20	3.98e-20	Mixed
Tyzzerella_nexilis.t__SGB4588_group	M2	0.0580212	0.155055	2591.51	0.374199	0.708287	2.46e-20	3.98e-20	Mixed
Tyzzerella_nexilis.t__SGB4588_group	M3	0.0194916	0.15326	2622.81	0.12718	0.898808	2.46e-20	3.98e-20	Mixed
Tyzzerella_nexilis.t__SGB4588_group	M6	0.095662	0.172128	2719.63	0.555761	0.57842	2.46e-20	3.98e-20	Mixed
Tyzzerella_nexilis.t__SGB4588_group	M9	0.521096	0.176152	2726.86	2.95821	0.00312093	2.46e-20	3.98e-20	Mixed
Tyzzerella_nexilis.t__SGB4588_group	M12	1.38274	0.175364	2788.52	7.88496	4.48e-15	2.46e-20	3.98e-20	Mixed
Ruthenibacterium_lactatiformans.t__SGB15271	M1	0.0286327	0.185561	2561.34	0.154303	0.877383	8.93e-18	1.42e-17	Mixed
Ruthenibacterium_lactatiformans.t__SGB15271	M2	0.200947	0.182995	2563.51	1.0981	0.272263	8.93e-18	1.42e-17	Mixed
Ruthenibacterium_lactatiformans.t__SGB15271	M3	0.246038	0.181092	2595.71	1.35863	0.174381	8.93e-18	1.42e-17	Mixed
Ruthenibacterium_lactatiformans.t__SGB15271	M6	0.502434	0.204129	2680.98	2.46136	0.0139037	8.93e-18	1.42e-17	Mixed
Ruthenibacterium_lactatiformans.t__SGB15271	M9	-0.163663	0.208949	2684.62	-0.783269	0.433538	8.93e-18	1.42e-17	Mixed
Ruthenibacterium_lactatiformans.t__SGB15271	M12	1.45993	0.208626	2752.02	6.99787	3.25e-12	8.93e-18	1.42e-17	Mixed
Klebsiella_oxytoca.t__SGB10118	M1	0.406739	0.201887	2515.98	2.01469	0.0440438	1.7e-17	2.66e-17	Mixed
Klebsiella_oxytoca.t__SGB10118	M2	0.528247	0.199103	2518.71	2.65313	0.00802492	1.7e-17	2.66e-17	Mixed
Klebsiella_oxytoca.t__SGB10118	M3	0.379831	0.197149	2553.07	1.92662	0.0541373	1.7e-17	2.66e-17	Mixed
Klebsiella_oxytoca.t__SGB10118	M6	0.941552	0.222579	2637.81	4.2302	2.41e-05	1.7e-17	2.66e-17	Mixed
Klebsiella_oxytoca.t__SGB10118	M9	0.337638	0.227848	2640.2	1.48186	0.138498	1.7e-17	2.66e-17	Mixed
Klebsiella_oxytoca.t__SGB10118	M12	-0.914489	0.227826	2714.57	-4.01399	6.13e-05	1.7e-17	2.66e-17	Mixed
Firmicutes_bacterium_AF16_15.t__SGB4993	M1	-0.0368938	0.113282	2586.14	-0.325681	0.744692	5.43e-17	8.39e-17	Mixed
Firmicutes_bacterium_AF16_15.t__SGB4993	M2	-0.102867	0.111707	2585.43	-0.920866	0.357206	5.43e-17	8.39e-17	Mixed
Firmicutes_bacterium_AF16_15.t__SGB4993	M3	-0.18346	0.110271	2617.31	-1.66372	0.0962886	5.43e-17	8.39e-17	Mixed
Firmicutes_bacterium_AF16_15.t__SGB4993	M6	-0.465473	0.123256	2736.72	-3.77648	0.000162445	5.43e-17	8.39e-17	Mixed
Firmicutes_bacterium_AF16_15.t__SGB4993	M9	-0.736376	0.126074	2750.73	-5.84081	5.8e-09	5.43e-17	8.39e-17	Mixed
Firmicutes_bacterium_AF16_15.t__SGB4993	M12	0.227041	0.125112	2809.76	1.8147	0.0696761	5.43e-17	8.39e-17	Mixed
Ruminococcus_bicirculans.t__SGB4262	M1	-0.0587524	0.113675	2558.84	-0.516845	0.605309	5.79e-17	8.81e-17	Mixed
Ruminococcus_bicirculans.t__SGB4262	M2	-0.131813	0.112094	2558.74	-1.17592	0.239738	5.79e-17	8.81e-17	Mixed
Ruminococcus_bicirculans.t__SGB4262	M3	-0.196097	0.110694	2592.84	-1.77151	0.0765928	5.79e-17	8.81e-17	Mixed
Ruminococcus_bicirculans.t__SGB4262	M6	-0.516025	0.123912	2713.87	-4.16446	3.22e-05	5.79e-17	8.81e-17	Mixed
Ruminococcus_bicirculans.t__SGB4262	M9	-0.758576	0.126768	2726.5	-5.98397	2.46e-09	5.79e-17	8.81e-17	Mixed
Ruminococcus_bicirculans.t__SGB4262	M12	0.183633	0.125915	2791.46	1.45839	0.144845	5.79e-17	8.81e-17	Mixed
Sutterella_wadsworthensis.t__SGB9286	M1	-0.137317	0.126703	2464.73	-1.08377	0.278571	8.97e-17	1.35e-16	Mixed
Sutterella_wadsworthensis.t__SGB9286	M2	-0.197411	0.124974	2468.09	-1.57962	0.114322	8.97e-17	1.35e-16	Mixed
Sutterella_wadsworthensis.t__SGB9286	M3	-0.3593	0.123948	2501.07	-2.89879	0.00377873	8.97e-17	1.35e-16	Mixed
Sutterella_wadsworthensis.t__SGB9286	M6	-0.5087	0.140463	2567.06	-3.62159	0.000298468	8.97e-17	1.35e-16	Mixed
Sutterella_wadsworthensis.t__SGB9286	M9	-0.950288	0.143794	2566.36	-6.60868	4.7e-11	8.97e-17	1.35e-16	Mixed
Sutterella_wadsworthensis.t__SGB9286	M12	-1.06069	0.144361	2641.58	-7.34743	2.68e-13	8.97e-17	1.35e-16	Mixed
Veillonella_dispar.t__SGB6952	M1	-0.698472	0.278895	2551.37	-2.50443	0.012327	1.49e-16	2.2e-16	Mixed
Veillonella_dispar.t__SGB6952	M2	-1.58392	0.275023	2552.75	-5.75922	9.46e-09	1.49e-16	2.2e-16	Mixed
Veillonella_dispar.t__SGB6952	M3	-1.79837	0.271893	2586.92	-6.61424	4.52e-11	1.49e-16	2.2e-16	Mixed
Veillonella_dispar.t__SGB6952	M6	-1.44466	0.305566	2690.34	-4.72783	2.39e-06	1.49e-16	2.2e-16	Mixed
Veillonella_dispar.t__SGB6952	M9	-0.521975	0.312726	2697.5	-1.66911	0.0952113	1.49e-16	2.2e-16	Mixed
Veillonella_dispar.t__SGB6952	M12	-2.09277	0.311478	2766.33	-6.71884	2.22e-11	1.49e-16	2.2e-16	Mixed
Bacteroides_stercoris.t__SGB1830_group	M1	0.0536927	0.148589	2480.61	0.361351	0.717868	4.72e-16	6.89e-16	Mixed
Bacteroides_stercoris.t__SGB1830_group	M2	-0.00205607	0.146575	2483.73	-0.0140274	0.988809	4.72e-16	6.89e-16	Mixed
Bacteroides_stercoris.t__SGB1830_group	M3	-0.108546	0.1455	2512.44	-0.746023	0.455724	4.72e-16	6.89e-16	Mixed
Bacteroides_stercoris.t__SGB1830_group	M6	-0.237572	0.165166	2563.51	-1.43838	0.150448	4.72e-16	6.89e-16	Mixed
Bacteroides_stercoris.t__SGB1830_group	M9	-0.954765	0.169077	2561.9	-5.64694	1.81e-08	4.72e-16	6.89e-16	Mixed
Bacteroides_stercoris.t__SGB1830_group	M12	-0.995149	0.170112	2628.03	-5.84995	5.53e-09	4.72e-16	6.89e-16	Mixed
Megasphaera_micronuciformis.t__SGB5868	M1	0.157509	0.20035	2601.9	0.78617	0.43184	8.76e-16	1.26e-15	Mixed
Megasphaera_micronuciformis.t__SGB5868	M2	0.391622	0.197565	2602.63	1.98224	0.0475572	8.76e-16	1.26e-15	Mixed
Megasphaera_micronuciformis.t__SGB5868	M3	0.549407	0.195223	2633.18	2.81426	0.00492535	8.76e-16	1.26e-15	Mixed
Megasphaera_micronuciformis.t__SGB5868	M6	0.953542	0.219044	2731.36	4.35321	1.39e-05	8.76e-16	1.26e-15	Mixed
Megasphaera_micronuciformis.t__SGB5868	M9	1.7375	0.224146	2739.51	7.75162	1.27e-14	8.76e-16	1.26e-15	Mixed
Megasphaera_micronuciformis.t__SGB5868	M12	0.543885	0.222986	2798.65	2.4391	0.0147858	8.76e-16	1.26e-15	Mixed
Ruminococcus_bromii.t__SGB4285_group	M1	-0.0642976	0.13893	2611.51	-0.462806	0.643542	1.99e-15	2.82e-15	Mixed
Ruminococcus_bromii.t__SGB4285_group	M2	-0.14196	0.137	2610.24	-1.03621	0.300201	1.99e-15	2.82e-15	Mixed
Ruminococcus_bromii.t__SGB4285_group	M3	-0.158804	0.135192	2639.91	-1.17465	0.24024	1.99e-15	2.82e-15	Mixed
Ruminococcus_bromii.t__SGB4285_group	M6	-0.471267	0.150891	2757.08	-3.12322	0.0018074	1.99e-15	2.82e-15	Mixed
Ruminococcus_bromii.t__SGB4285_group	M9	-0.165704	0.154311	2772.37	-1.07383	0.282992	1.99e-15	2.82e-15	Mixed
Ruminococcus_bromii.t__SGB4285_group	M12	0.749345	0.153003	2825.86	4.89759	1.02e-06	1.99e-15	2.82e-15	Mixed
GGB3746_SGB5089.t__SGB5089	M1	0.00341096	0.145454	2589.75	0.0234505	0.981293	6.6e-15	9.24e-15	Mixed
GGB3746_SGB5089.t__SGB5089	M2	-0.0643476	0.143431	2589.48	-0.448632	0.653735	6.6e-15	9.24e-15	Mixed
GGB3746_SGB5089.t__SGB5089	M3	-0.169117	0.141624	2621.14	-1.19413	0.232535	6.6e-15	9.24e-15	Mixed
GGB3746_SGB5089.t__SGB5089	M6	-0.119184	0.158465	2734.91	-0.752118	0.452045	6.6e-15	9.24e-15	Mixed
GGB3746_SGB5089.t__SGB5089	M9	0.744652	0.16211	2747.17	4.59351	4.56e-06	6.6e-15	9.24e-15	Mixed
GGB3746_SGB5089.t__SGB5089	M12	0.773671	0.160974	2806.47	4.80617	1.62e-06	6.6e-15	9.24e-15	Mixed
Akkermansia_muciniphila.t__SGB9226	M1	0.337614	0.220208	2583.3	1.53316	0.125359	5.32e-13	7.35e-13	Mixed
Akkermansia_muciniphila.t__SGB9226	M2	0.376807	0.217149	2584.46	1.73525	0.0828166	5.32e-13	7.35e-13	Mixed
Akkermansia_muciniphila.t__SGB9226	M3	0.503659	0.214651	2616.27	2.34641	0.0190297	5.32e-13	7.35e-13	Mixed
Akkermansia_muciniphila.t__SGB9226	M6	0.924221	0.241134	2713.81	3.83281	0.000129567	5.32e-13	7.35e-13	Mixed
Akkermansia_muciniphila.t__SGB9226	M9	0.98283	0.246777	2720.89	3.98267	6.99e-05	5.32e-13	7.35e-13	Mixed
Akkermansia_muciniphila.t__SGB9226	M12	1.83455	0.245715	2783.92	7.46619	1.1e-13	5.32e-13	7.35e-13	Mixed
Blautia_faecis.t__SGB4820	M1	-0.017505	0.119325	2578.69	-0.1467	0.88338	8.59e-12	1.17e-11	Mixed
Blautia_faecis.t__SGB4820	M2	-0.10294	0.117666	2578.94	-0.874852	0.381736	8.59e-12	1.17e-11	Mixed
Blautia_faecis.t__SGB4820	M3	-0.150385	0.116224	2611.47	-1.29393	0.195805	8.59e-12	1.17e-11	Mixed
Blautia_faecis.t__SGB4820	M6	-0.336234	0.130217	2722.6	-2.58211	0.00987171	8.59e-12	1.17e-11	Mixed
Blautia_faecis.t__SGB4820	M9	-0.149852	0.133232	2733.27	-1.12475	0.260794	8.59e-12	1.17e-11	Mixed
Blautia_faecis.t__SGB4820	M12	0.564705	0.132411	2795.51	4.26478	2.07e-05	8.59e-12	1.17e-11	Mixed
Phocaeicola_dorei.t__SGB1815	M1	0.229261	0.217411	2402.79	1.0545	0.291758	4.8e-11	6.47e-11	Mixed
Phocaeicola_dorei.t__SGB1815	M2	0.194701	0.214508	2405.34	0.907663	0.364147	4.8e-11	6.47e-11	Mixed
Phocaeicola_dorei.t__SGB1815	M3	-0.207692	0.213329	2427.94	-0.973578	0.330363	4.8e-11	6.47e-11	Mixed
Phocaeicola_dorei.t__SGB1815	M6	-0.591473	0.242883	2459.45	-2.43521	0.0149536	4.8e-11	6.47e-11	Mixed
Phocaeicola_dorei.t__SGB1815	M9	-1.13033	0.248594	2456.97	-4.54691	5.71e-06	4.8e-11	6.47e-11	Mixed
Phocaeicola_dorei.t__SGB1815	M12	-0.985514	0.251247	2509.99	-3.92249	9e-05	4.8e-11	6.47e-11	Mixed
Collinsella_aerofaciens.t__SGB14546_group	M1	0.802439	0.245723	2472.79	3.26562	0.00110716	1.11e-10	1.48e-10	Mixed
Collinsella_aerofaciens.t__SGB14546_group	M2	1.36548	0.242391	2475.98	5.63338	1.97e-08	1.11e-10	1.48e-10	Mixed
Collinsella_aerofaciens.t__SGB14546_group	M3	1.46092	0.240598	2505.36	6.07204	1.46e-09	1.11e-10	1.48e-10	Mixed
Collinsella_aerofaciens.t__SGB14546_group	M6	0.712732	0.273086	2558.12	2.60992	0.00910912	1.11e-10	1.48e-10	Mixed
Collinsella_aerofaciens.t__SGB14546_group	M9	0.454717	0.279552	2556.54	1.62659	0.103947	1.11e-10	1.48e-10	Mixed
Collinsella_aerofaciens.t__SGB14546_group	M12	0.443282	0.281219	2624.26	1.57629	0.11508	1.11e-10	1.48e-10	Mixed
Streptococcus_thermophilus.t__SGB8002	M1	0.104656	0.188535	2558.83	0.5551	0.578875	3.06e-09	4.01e-09	Mixed
Streptococcus_thermophilus.t__SGB8002	M2	0.0215346	0.185915	2559.8	0.11583	0.907796	3.06e-09	4.01e-09	Mixed
Streptococcus_thermophilus.t__SGB8002	M3	0.136144	0.183735	2593.66	0.74098	0.458773	3.06e-09	4.01e-09	Mixed
Streptococcus_thermophilus.t__SGB8002	M6	0.348689	0.206249	2701.15	1.69062	0.0910243	3.06e-09	4.01e-09	Mixed
Streptococcus_thermophilus.t__SGB8002	M9	1.22884	0.211062	2709.69	5.82219	6.49e-09	3.06e-09	4.01e-09	Mixed
Streptococcus_thermophilus.t__SGB8002	M12	0.399373	0.210038	2776.64	1.90143	0.057349	3.06e-09	4.01e-09	Mixed
Clostridium_symbiosum.t__SGB4699	M1	-0.0514583	0.13435	2550.44	-0.383018	0.701738	3.79e-09	4.91e-09	Mixed
Clostridium_symbiosum.t__SGB4699	M2	-0.108163	0.132488	2552.34	-0.8164	0.414347	3.79e-09	4.91e-09	Mixed
Clostridium_symbiosum.t__SGB4699	M3	-0.188002	0.131052	2585.98	-1.43457	0.151532	3.79e-09	4.91e-09	Mixed
Clostridium_symbiosum.t__SGB4699	M6	-0.244874	0.147532	2680.62	-1.65981	0.0970705	3.79e-09	4.91e-09	Mixed
Clostridium_symbiosum.t__SGB4699	M9	-0.096093	0.151006	2685.76	-0.636354	0.5246	3.79e-09	4.91e-09	Mixed
Clostridium_symbiosum.t__SGB4699	M12	0.608166	0.150605	2755.16	4.03815	5.53e-05	3.79e-09	4.91e-09	Mixed
Hungatella_hathewayi.t__SGB4742	M1	-0.125664	0.14692	2558.4	-0.855319	0.392455	7.69e-09	9.84e-09	Mixed
Hungatella_hathewayi.t__SGB4742	M2	-0.147816	0.144889	2560.66	-1.0202	0.30773	7.69e-09	9.84e-09	Mixed
Hungatella_hathewayi.t__SGB4742	M3	-0.123383	0.1434	2592.88	-0.860409	0.389643	7.69e-09	9.84e-09	Mixed
Hungatella_hathewayi.t__SGB4742	M6	-0.360518	0.161696	2676.93	-2.22961	0.0258559	7.69e-09	9.84e-09	Mixed
Hungatella_hathewayi.t__SGB4742	M9	0.0244004	0.165516	2680.27	0.14742	0.882812	7.69e-09	9.84e-09	Mixed
Hungatella_hathewayi.t__SGB4742	M12	0.636355	0.165309	2748.09	3.8495	0.000121059	7.69e-09	9.84e-09	Mixed
GGB6561_SGB9269.t__SGB9269	M1	-0.109013	0.142629	2527.52	-0.764306	0.444756	1.7e-08	2.15e-08	Mixed
GGB6561_SGB9269.t__SGB9269	M2	-0.0374988	0.140671	2530.43	-0.266571	0.789822	1.7e-08	2.15e-08	Mixed
GGB6561_SGB9269.t__SGB9269	M3	0.010901	0.13939	2562.34	0.0782052	0.937671	1.7e-08	2.15e-08	Mixed
GGB6561_SGB9269.t__SGB9269	M6	-0.187392	0.157646	2633.92	-1.18869	0.234669	1.7e-08	2.15e-08	Mixed
GGB6561_SGB9269.t__SGB9269	M9	-0.393041	0.161383	2634.71	-2.43545	0.0149392	1.7e-08	2.15e-08	Mixed
GGB6561_SGB9269.t__SGB9269	M12	-0.862858	0.161654	2705.04	-5.33768	1.02e-07	1.7e-08	2.15e-08	Mixed
Parabacteroides_distasonis.t__SGB1934	M1	0.37659	0.231907	2440.01	1.62389	0.104529	5.98e-08	7.47e-08	Mixed
Parabacteroides_distasonis.t__SGB1934	M2	0.205033	0.228783	2443.04	0.896189	0.37024	5.98e-08	7.47e-08	Mixed
Parabacteroides_distasonis.t__SGB1934	M3	-0.361807	0.227283	2470.1	-1.59188	0.11154	5.98e-08	7.47e-08	Mixed
Parabacteroides_distasonis.t__SGB1934	M6	-0.526622	0.258353	2513.57	-2.03838	0.0416166	5.98e-08	7.47e-08	Mixed
Parabacteroides_distasonis.t__SGB1934	M9	-0.892103	0.264455	2511.36	-3.37336	0.000753821	5.98e-08	7.47e-08	Mixed
Parabacteroides_distasonis.t__SGB1934	M12	-0.744562	0.266588	2574.5	-2.79294	0.00526182	5.98e-08	7.47e-08	Mixed
Dysosmobacter_welbionis.t__SGB15078	M1	-0.0337	0.129098	2611.9	-0.261041	0.794081	8.13e-08	1e-07	Mixed
Dysosmobacter_welbionis.t__SGB15078	M2	-0.0741265	0.127303	2611.37	-0.582283	0.560427	8.13e-08	1e-07	Mixed
Dysosmobacter_welbionis.t__SGB15078	M3	-0.129893	0.125677	2641.22	-1.03355	0.301441	8.13e-08	1e-07	Mixed
Dysosmobacter_welbionis.t__SGB15078	M6	-0.240626	0.140521	2751.14	-1.71239	0.0869379	8.13e-08	1e-07	Mixed
Dysosmobacter_welbionis.t__SGB15078	M9	-0.630268	0.14374	2763.67	-4.38479	1.2e-05	8.13e-08	1e-07	Mixed
Dysosmobacter_welbionis.t__SGB15078	M12	0.187395	0.14267	2818.6	1.31349	0.189126	8.13e-08	1e-07	Mixed
Ruminococcus_torques.t__SGB4563_group	M1	-0.0233717	0.135013	2530.65	-0.173107	0.862581	3.81e-06	4.65e-06	Mixed
Ruminococcus_torques.t__SGB4563_group	M2	-0.048999	0.133148	2533.18	-0.368003	0.712902	3.81e-06	4.65e-06	Mixed
Ruminococcus_torques.t__SGB4563_group	M3	-0.0455475	0.131809	2567.01	-0.345556	0.729705	3.81e-06	4.65e-06	Mixed
Ruminococcus_torques.t__SGB4563_group	M6	-0.122738	0.148716	2652.99	-0.825322	0.409263	3.81e-06	4.65e-06	Mixed
Ruminococcus_torques.t__SGB4563_group	M9	-0.22948	0.152233	2655.93	-1.50742	0.131822	3.81e-06	4.65e-06	Mixed
Ruminococcus_torques.t__SGB4563_group	M12	0.513703	0.152126	2728.26	3.37682	0.000743571	3.81e-06	4.65e-06	Mixed
Alistipes_finegoldii.t__SGB2301	M1	0.0694049	0.148834	2560.2	0.466325	0.641022	5.24e-06	6.33e-06	Mixed
Alistipes_finegoldii.t__SGB2301	M2	0.00671821	0.146769	2561.87	0.045774	0.963494	5.24e-06	6.33e-06	Mixed
Alistipes_finegoldii.t__SGB2301	M3	-0.0407682	0.145146	2595.04	-0.280877	0.778827	5.24e-06	6.33e-06	Mixed
Alistipes_finegoldii.t__SGB2301	M6	-0.318052	0.163288	2691.06	-1.9478	0.0515427	5.24e-06	6.33e-06	Mixed
Alistipes_finegoldii.t__SGB2301	M9	-0.648558	0.167126	2696.85	-3.88066	0.00010667	5.24e-06	6.33e-06	Mixed
Alistipes_finegoldii.t__SGB2301	M12	0.0601792	0.166591	2764.43	0.361238	0.717949	5.24e-06	6.33e-06	Mixed
Bifidobacterium_adolescentis.t__SGB17244	M1	0.123154	0.247636	2467.23	0.497316	0.619011	8.73e-06	1.03e-05	Mixed
Bifidobacterium_adolescentis.t__SGB17244	M2	0.19447	0.244279	2470.43	0.796097	0.426052	8.73e-06	1.03e-05	Mixed
Bifidobacterium_adolescentis.t__SGB17244	M3	0.15704	0.242479	2499.97	0.647643	0.517275	8.73e-06	1.03e-05	Mixed
Bifidobacterium_adolescentis.t__SGB17244	M6	-0.486891	0.275238	2552.78	-1.76898	0.0770165	8.73e-06	1.03e-05	Mixed
Bifidobacterium_adolescentis.t__SGB17244	M9	-0.830686	0.281755	2551.16	-2.94826	0.00322475	8.73e-06	1.03e-05	Mixed
Bifidobacterium_adolescentis.t__SGB17244	M12	-0.839273	0.283459	2619.32	-2.96083	0.00309569	8.73e-06	1.03e-05	Mixed
Lachnospiraceae_bacterium.t__SGB4750	M1	0.00545413	0.121224	2587.33	0.0449922	0.964117	8.74e-06	1.03e-05	Mixed
Lachnospiraceae_bacterium.t__SGB4750	M2	-0.128967	0.119538	2587.81	-1.07887	0.280745	8.74e-06	1.03e-05	Mixed
Lachnospiraceae_bacterium.t__SGB4750	M3	-0.195189	0.118095	2619.62	-1.65282	0.0984868	8.74e-06	1.03e-05	Mixed
Lachnospiraceae_bacterium.t__SGB4750	M6	-0.410965	0.1324	2725.33	-3.10398	0.00192898	8.74e-06	1.03e-05	Mixed
Lachnospiraceae_bacterium.t__SGB4750	M9	-0.240956	0.135474	2734.86	-1.77862	0.0754136	8.74e-06	1.03e-05	Mixed
Lachnospiraceae_bacterium.t__SGB4750	M12	0.224876	0.134699	2796.05	1.66948	0.0951349	8.74e-06	1.03e-05	Mixed
Alistipes_onderdonkii.t__SGB2303	M1	0.134027	0.172235	2501.44	0.778164	0.436546	1.07e-05	1.24e-05	Mixed
Alistipes_onderdonkii.t__SGB2303	M2	0.0784443	0.169884	2504.59	0.461753	0.644298	1.07e-05	1.24e-05	Mixed
Alistipes_onderdonkii.t__SGB2303	M3	0.120694	0.168477	2535.67	0.716384	0.47382	1.07e-05	1.24e-05	Mixed
Alistipes_onderdonkii.t__SGB2303	M6	-0.250933	0.190896	2598.29	-1.3145	0.188795	1.07e-05	1.24e-05	Mixed
Alistipes_onderdonkii.t__SGB2303	M9	-0.732453	0.195423	2597.73	-3.74804	0.000182105	1.07e-05	1.24e-05	Mixed
Alistipes_onderdonkii.t__SGB2303	M12	-0.143304	0.196159	2668.01	-0.730551	0.465117	1.07e-05	1.24e-05	Mixed
Bacteroides_fragilis.t__SGB1855_group	M1	0.28532	0.236566	2440.17	1.20609	0.227899	1.84e-05	2.12e-05	Mixed
Bacteroides_fragilis.t__SGB1855_group	M2	0.49412	0.233384	2443.12	2.1172	0.0343437	1.84e-05	2.12e-05	Mixed
Bacteroides_fragilis.t__SGB1855_group	M3	0.238696	0.231889	2469.4	1.02936	0.303413	1.84e-05	2.12e-05	Mixed
Bacteroides_fragilis.t__SGB1855_group	M6	0.686774	0.263654	2510.75	2.60483	0.00924618	1.84e-05	2.12e-05	Mixed
Bacteroides_fragilis.t__SGB1855_group	M9	0.490035	0.269877	2508.48	1.81577	0.0695249	1.84e-05	2.12e-05	Mixed
Bacteroides_fragilis.t__SGB1855_group	M12	1.3383	0.272156	2569.83	4.91742	9.32e-07	1.84e-05	2.12e-05	Mixed
Alistipes_putredinis.t__SGB2318	M1	0.14691	0.157011	2529.88	0.935668	0.349533	8.02e-05	9.16e-05	Mixed
Alistipes_putredinis.t__SGB2318	M2	0.168847	0.154842	2532.37	1.09045	0.275619	8.02e-05	9.16e-05	Mixed
Alistipes_putredinis.t__SGB2318	M3	0.162884	0.153272	2566.41	1.06271	0.288014	8.02e-05	9.16e-05	Mixed
Alistipes_putredinis.t__SGB2318	M6	-0.00869082	0.172894	2653.84	-0.0502667	0.959914	8.02e-05	9.16e-05	Mixed
Alistipes_putredinis.t__SGB2318	M9	-0.557195	0.176982	2657	-3.14831	0.00166038	8.02e-05	9.16e-05	Mixed
Alistipes_putredinis.t__SGB2318	M12	0.0349062	0.176822	2729.59	0.197408	0.843523	8.02e-05	9.16e-05	Mixed
Lachnospira_pectinoschiza.t__SGB5075_group	M1	-0.0741469	0.121985	2619.57	-0.607837	0.543348	0.00011769	0.000132876	Mixed
Lachnospira_pectinoschiza.t__SGB5075_group	M2	-0.163158	0.120289	2618.96	-1.35638	0.175094	0.00011769	0.000132876	Mixed
Lachnospira_pectinoschiza.t__SGB5075_group	M3	-0.269422	0.118745	2648.16	-2.26892	0.0233535	0.00011769	0.000132876	Mixed
Lachnospira_pectinoschiza.t__SGB5075_group	M6	-0.50318	0.132738	2756.62	-3.79078	0.000153391	0.00011769	0.000132876	Mixed
Lachnospira_pectinoschiza.t__SGB5075_group	M9	-0.131626	0.135774	2769.21	-0.969447	0.332407	0.00011769	0.000132876	Mixed
Lachnospira_pectinoschiza.t__SGB5075_group	M12	0.0687546	0.134744	2822.64	0.510262	0.609908	0.00011769	0.000132876	Mixed
Sellimonas_intestinalis.t__SGB4617	M1	-0.0503569	0.136198	2571	-0.369734	0.711611	0.00017509	0.000195579	Mixed
Sellimonas_intestinalis.t__SGB4617	M2	-0.0818781	0.134309	2572.7	-0.609625	0.542164	0.00017509	0.000195579	Mixed
Sellimonas_intestinalis.t__SGB4617	M3	-0.0716799	0.132835	2604.96	-0.539614	0.589509	0.00017509	0.000195579	Mixed
Sellimonas_intestinalis.t__SGB4617	M6	0.315756	0.149479	2697.08	2.11238	0.0347457	0.00017509	0.000195579	Mixed
Sellimonas_intestinalis.t__SGB4617	M9	0.176844	0.152995	2702.4	1.15588	0.247833	0.00017509	0.000195579	Mixed
Sellimonas_intestinalis.t__SGB4617	M12	0.476297	0.152539	2768.14	3.12246	0.00181199	0.00017509	0.000195579	Mixed
Bacteroides_uniformis.t__SGB1836_group	M1	0.772248	0.244162	2446.16	3.16285	0.00158147	0.000315075	0.000348241	Mixed
Bacteroides_uniformis.t__SGB1836_group	M2	0.944224	0.240869	2449.24	3.92008	9.09e-05	0.000315075	0.000348241	Mixed
Bacteroides_uniformis.t__SGB1836_group	M3	0.68251	0.239251	2476.83	2.8527	0.00437093	0.000315075	0.000348241	Mixed
Bacteroides_uniformis.t__SGB1836_group	M6	0.872161	0.271884	2522.09	3.20784	0.00135411	0.000315075	0.000348241	Mixed
Bacteroides_uniformis.t__SGB1836_group	M9	0.366965	0.278309	2519.97	1.31855	0.18744	0.000315075	0.000348241	Mixed
Bacteroides_uniformis.t__SGB1836_group	M12	1.06997	0.280443	2584.23	3.81529	0.000139212	0.000315075	0.000348241	Mixed
Phocaeicola_vulgatus.t__SGB1814	M1	0.396533	0.257314	2453.58	1.54105	0.123434	0.000546334	0.000597553	Mixed
Phocaeicola_vulgatus.t__SGB1814	M2	0.357708	0.253838	2456.71	1.4092	0.158903	0.000546334	0.000597553	Mixed
Phocaeicola_vulgatus.t__SGB1814	M3	0.216934	0.252078	2484.98	0.860585	0.38955	0.000546334	0.000597553	Mixed
Phocaeicola_vulgatus.t__SGB1814	M6	0.365955	0.286355	2532.73	1.27798	0.201374	0.000546334	0.000597553	Mixed
Phocaeicola_vulgatus.t__SGB1814	M9	0.259981	0.293127	2530.76	0.886924	0.375204	0.000546334	0.000597553	Mixed
Phocaeicola_vulgatus.t__SGB1814	M12	1.23003	0.295216	2596.44	4.16655	3.19e-05	0.000546334	0.000597553	Mixed
Gemmiger_formicilis.t__SGB15300	M1	-0.0749123	0.134281	2555.44	-0.557878	0.576977	0.000670132	0.000725401	Mixed
Gemmiger_formicilis.t__SGB15300	M2	-0.158582	0.132416	2556.68	-1.19761	0.231181	0.000670132	0.000725401	Mixed
Gemmiger_formicilis.t__SGB15300	M3	-0.233323	0.130893	2590.64	-1.78255	0.0747775	0.000670132	0.000725401	Mixed
Gemmiger_formicilis.t__SGB15300	M6	-0.44702	0.147044	2695.14	-3.04004	0.00238818	0.000670132	0.000725401	Mixed
Gemmiger_formicilis.t__SGB15300	M9	-0.485579	0.150485	2702.75	-3.22677	0.00126693	0.000670132	0.000725401	Mixed
Gemmiger_formicilis.t__SGB15300	M12	-0.0221393	0.149839	2770.68	-0.147754	0.882547	0.000670132	0.000725401	Mixed
Sutterella_wadsworthensis.t__SGB9283	M1	0.0505848	0.186406	2452.8	0.271369	0.78613	0.00652994	0.00699636	Mixed
Sutterella_wadsworthensis.t__SGB9283	M2	-0.134443	0.183891	2455.87	-0.731101	0.464787	0.00652994	0.00699636	Mixed
Sutterella_wadsworthensis.t__SGB9283	M3	-0.251349	0.182644	2483.45	-1.37617	0.168893	0.00652994	0.00699636	Mixed
Sutterella_wadsworthensis.t__SGB9283	M6	0.206106	0.207535	2529.07	0.993115	0.320749	0.00652994	0.00699636	Mixed
Sutterella_wadsworthensis.t__SGB9283	M9	0.327333	0.21244	2527	1.54082	0.123485	0.00652994	0.00699636	Mixed
Sutterella_wadsworthensis.t__SGB9283	M12	0.382741	0.214036	2591.15	1.78821	0.0738591	0.00652994	0.00699636	Mixed
Blautia_massiliensis.t__SGB4826_group	M1	-0.0947226	0.129321	2544.93	-0.732462	0.463954	0.0191699	0.0203317	Mixed
Blautia_massiliensis.t__SGB4826_group	M2	-0.116998	0.127525	2546.27	-0.917452	0.358993	0.0191699	0.0203317	Mixed
Blautia_massiliensis.t__SGB4826_group	M3	-0.132897	0.126068	2580.98	-1.05417	0.291902	0.0191699	0.0203317	Mixed
Blautia_massiliensis.t__SGB4826_group	M6	-0.299477	0.141657	2686.84	-2.1141	0.0345986	0.0191699	0.0203317	Mixed
Blautia_massiliensis.t__SGB4826_group	M9	-0.382031	0.144975	2694.33	-2.63516	0.00845793	0.0191699	0.0203317	Mixed
Blautia_massiliensis.t__SGB4826_group	M12	0.0381998	0.144378	2764.22	0.264582	0.791352	0.0191699	0.0203317	Mixed
Bacteroides_ovatus.t__SGB1871	M1	0.451864	0.209259	2449.19	2.15936	0.0309192	0.0265233	0.0278494	Mixed
Bacteroides_ovatus.t__SGB1871	M2	0.229385	0.206441	2452.16	1.11114	0.266616	0.0265233	0.0278494	Mixed
Bacteroides_ovatus.t__SGB1871	M3	0.107706	0.205094	2478.65	0.525155	0.599523	0.0265233	0.0278494	Mixed
Bacteroides_ovatus.t__SGB1871	M6	0.648141	0.233144	2520.99	2.78001	0.00547615	0.0265233	0.0278494	Mixed
Bacteroides_ovatus.t__SGB1871	M9	0.48618	0.238649	2518.8	2.03721	0.041733	0.0265233	0.0278494	Mixed
Bacteroides_ovatus.t__SGB1871	M12	0.565787	0.240594	2580.54	2.35163	0.0187663	0.0265233	0.0278494	Mixed
Bacteroides_xylanisolvens.t__SGB1867	M1	0.232276	0.165799	2476.82	1.40095	0.161354	0.0306684	0.031883	Mixed
Bacteroides_xylanisolvens.t__SGB1867	M2	0.0532728	0.163548	2480.02	0.325732	0.744655	0.0306684	0.031883	Mixed
Bacteroides_xylanisolvens.t__SGB1867	M3	-0.0393419	0.162312	2509.83	-0.242384	0.808502	0.0306684	0.031883	Mixed
Bacteroides_xylanisolvens.t__SGB1867	M6	-0.0841516	0.184176	2564.48	-0.45691	0.647775	0.0306684	0.031883	Mixed
Bacteroides_xylanisolvens.t__SGB1867	M9	-0.279481	0.188538	2563.05	-1.48235	0.138369	0.0306684	0.031883	Mixed
Bacteroides_xylanisolvens.t__SGB1867	M12	-0.334474	0.189589	2631.58	-1.7642	0.0778135	0.0306684	0.031883	Mixed
Bacteroides_thetaiotaomicron.t__SGB1861	M1	0.130368	0.201277	2446.22	0.647707	0.517235	0.129672	0.133486	Mixed
Bacteroides_thetaiotaomicron.t__SGB1861	M2	0.190813	0.198562	2449.29	0.960974	0.33666	0.129672	0.133486	Mixed
Bacteroides_thetaiotaomicron.t__SGB1861	M3	0.0357094	0.19723	2476.84	0.181055	0.856339	0.129672	0.133486	Mixed
Bacteroides_thetaiotaomicron.t__SGB1861	M6	-0.0860294	0.224135	2522	-0.383829	0.701137	0.129672	0.133486	Mixed
Bacteroides_thetaiotaomicron.t__SGB1861	M9	-0.369098	0.229431	2519.88	-1.60875	0.107796	0.129672	0.133486	Mixed
Bacteroides_thetaiotaomicron.t__SGB1861	M12	-0.241242	0.231194	2584.04	-1.04346	0.296832	0.129672	0.133486	Mixed
Bacteroides_caccae.t__SGB1877	M1	0.405339	0.202076	2438.98	2.00588	0.0449798	0.174664	0.178056	Mixed
Bacteroides_caccae.t__SGB1877	M2	0.383773	0.199355	2442	1.92508	0.0543358	0.174664	0.178056	Mixed
Bacteroides_caccae.t__SGB1877	M3	0.373565	0.198054	2468.94	1.88618	0.0593885	0.174664	0.178056	Mixed
Bacteroides_caccae.t__SGB1877	M6	0.435762	0.22514	2512.04	1.93551	0.0530395	0.174664	0.178056	Mixed
Bacteroides_caccae.t__SGB1877	M9	0.049296	0.230457	2509.81	0.213905	0.830638	0.174664	0.178056	Mixed
Bacteroides_caccae.t__SGB1877	M12	0.209738	0.232333	2572.7	0.902746	0.366745	0.174664	0.178056	Mixed
Enterocloster_clostridioformis.t__SGB4760	M1	-0.137535	0.13503	2519.23	-1.01856	0.308511	0.432552	0.436711	Mixed
Enterocloster_clostridioformis.t__SGB4760	M2	-0.245994	0.13317	2522.05	-1.84722	0.0648329	0.432552	0.436711	Mixed
Enterocloster_clostridioformis.t__SGB4760	M3	-0.202523	0.131893	2555.68	-1.53551	0.124782	0.432552	0.436711	Mixed
Enterocloster_clostridioformis.t__SGB4760	M6	-0.240142	0.148993	2636.1	-1.61176	0.107133	0.432552	0.436711	Mixed
Enterocloster_clostridioformis.t__SGB4760	M9	-0.336597	0.152523	2637.92	-2.20686	0.0274097	0.432552	0.436711	Mixed
Enterocloster_clostridioformis.t__SGB4760	M12	-0.237548	0.152596	2711.18	-1.55671	0.119656	0.432552	0.436711	Mixed
Prevotella_copri_clade_A.t__SGB1626	M1	0.0469767	0.175975	2532.17	0.266951	0.789528	0.671386	0.671386	Mixed
Prevotella_copri_clade_A.t__SGB1626	M2	-0.00945648	0.173555	2534.99	-0.054487	0.956551	0.671386	0.671386	Mixed
Prevotella_copri_clade_A.t__SGB1626	M3	-0.0737105	0.171931	2567.2	-0.428721	0.668162	0.671386	0.671386	Mixed
Prevotella_copri_clade_A.t__SGB1626	M6	-0.239145	0.194334	2641.8	-1.23059	0.218587	0.671386	0.671386	Mixed
Prevotella_copri_clade_A.t__SGB1626	M9	-0.216087	0.198941	2643.06	-1.08619	0.277494	0.671386	0.671386	Mixed
Prevotella_copri_clade_A.t__SGB1626	M12	-0.0799196	0.199151	2713.48	-0.4013	0.688231	0.671386	0.671386	Mixed

## Sheet: Table S20.
Table S20. Pairwise distances between same, related and unrelated mother:mother and infant:infant pairs (green: FDR<0.05)
Type	Relations	Time point	Number of Permutations	Pvalue	FDR
mother:mother	same_vs_unrelated	B-M3	2000	0	0
mother:mother	related_vs_unrelated	B-M3	2000	0	0
mother:mother	same_vs_unrelated	P28-B	2000	0	0
mother:mother	related_vs_unrelated	P28-B	2000	0	0
mother:mother	same_vs_unrelated	P12-P28	2000	0	0
mother:mother	related_vs_unrelated	P12-P28	2000	0	0
infant:infant	same_vs_related	M2-M3	2000	0	0
infant:infant	same_vs_unrelated	M2-M3	2000	0	0
infant:infant	related_vs_unrelated	M2-M3	2000	0	0
infant:infant	same_vs_unrelated	M3-M6	2000	0	0
infant:infant	related_vs_unrelated	M3-M6	2000	0	0
infant:infant	same_vs_unrelated	W2-M1	2000	0	0
infant:infant	same_vs_related	M1-M2	2000	0	0
infant:infant	same_vs_unrelated	M1-M2	2000	0	0
infant:infant	same_vs_unrelated	M6-M9	2000	0	0
infant:infant	related_vs_unrelated	M6-M9	2000	0	0
infant:infant	same_vs_unrelated	M9-M12	2000	0	0
infant:infant	related_vs_unrelated	M9-M12	2000	0	0
infant:infant	same_vs_related	W2-M1	2000	0.0005	0.0045
infant:infant	related_vs_unrelated	M1-M2	2000	0.0005	0.0045
infant:infant	related_vs_unrelated	W2-M1	2000	0.0015	0.0105
mother:mother	same_vs_related	B-M3	2000	0.003	0.018
mother:mother	same_vs_related	P28-B	2000	0.007	0.018
mother:mother	same_vs_related	P12-P28	2000	0.004	0.018
infant:infant	same_vs_related	M3-M6	2000	0.0035	0.018
infant:infant	same_vs_related	M9-M12	2000	0.0035	0.018
infant:infant	same_vs_related	M6-M9	2000	0.434	0.434

## Sheet: Table S21.
Table S21. Phenotypes associated with infant gut microbiome trajectories
Factor	Source	N_par	Degrees of Freedom	Phenotype	Corrected	P-value	FDR
1	initial_model	19	7	birth_deliverybirthcard_mode_binary		1.87e-16	2.44e-15
1	initial_model	26	14	infant_birthcard_feeding_mode_after_birth		5.34e-06	6.94e-05
1	initial_model	19	7	birth_deliverybirthcard_place_delivery_simple		0.000176	0.00229
1	initial_model	19	7	infant_growth_birth_weight_kg		0.000734	0.00954
1	initial_model	26	14	mother_birthcard_parity		0.00119	0.0154
1	initial_model	19	7	infant_health_eczema_diagnosis_strict		0.00371	0.0483
1	corrected_model	27	14		infant_birthcard_feeding_mode_after_birth	1.37e-06	1.65e-05
1	corrected_model	27	14		mother_birthcard_parity	0.000494	0.00593
1	corrected_model	20	7		infant_health_eczema_diagnosis_strict	0.00249	0.0299
1	corrected_model	20	7		infant_growth_birth_weight_kg	0.00314	0.0377
2	initial_model	19	7	birth_deliverybirthcard_mode_binary		1.95e-22	2.54e-21
2	initial_model	19	7	birth_deliverybirthcard_place_delivery_simple		1.33e-06	1.73e-05
2	initial_model	26	14	mother_birthcard_parity		4.57e-06	5.94e-05
2	corrected_model	27	14		mother_birthcard_parity	2.39e-06	2.87e-05
2	corrected_model	20	7		birth_deliverybirthcard_place_delivery_simple	0.000186	0.00223
2	corrected_model	20	7		infant_health_eczema_diagnosis_strict	0.00382	0.0459
3	initial_model	26	14	infant_birthcard_feeding_mode_after_birth		5.92e-15	7.7e-14
3	initial_model	26	14	mother_birthcard_parity		1.75e-05	0.000227
3	initial_model	19	7	infant_misc_sex		2.57e-05	0.000334
3	corrected_model	28	14		mother_birthcard_parity	1.55e-05	0.000186
3	corrected_model	21	7		infant_misc_sex	2.3e-05	0.000276
4	initial_model	19	7	mother_health_smoked_one_whole_year_p18		0.00035	0.00455
4	corrected_model	20	7		family_pets_any	0.0041	0.0492
5	initial_model	19	7	birth_deliverybirthcard_place_delivery_simple		2.4e-06	3.11e-05
6	initial_model	26	14	infant_birthcard_feeding_mode_after_birth		0.00125	0.0162
8	initial_model	26	14	infant_birthcard_feeding_mode_after_birth		8.12e-07	1.06e-05
10	initial_model	26	14	infant_birthcard_feeding_mode_after_birth		4.54e-07	5.9e-06
10	initial_model	26	14	mother_birthcard_parity		5.52e-06	7.18e-05
10	corrected_model	28	14		mother_birthcard_parity	1.58e-07	1.9e-06

## Sheet: Table S22.
Table S22. Phenotypes associated with factors of infant gut microbiome trajectories
Factor	Phenotype	Degrees of Freedom	Estimate	Standard Error	P-value
Factor1	(Intercept)	2440	-2.01	0.16	4.85e-35
Factor1	clean_reads_FQ_1	2530	-0.0378	0.0205	0.066
Factor1	dna_conc	2720	0.369	0.0257	3.29e-45
Factor1	BATCH_NUMBER	2830	-0.0192	0.0262	0.463
Factor1	birth_deliverybirthcard_mode_binaryVG	2430	1.06	0.174	1.25e-09
Factor1	M1	2410	0.547	0.175	0.00175
Factor1	M2	2400	0.828	0.175	2.32e-06
Factor1	M3	2460	0.831	0.175	2.23e-06
Factor1	M6	2490	1.61	0.202	2.91e-15
Factor1	M9	2490	2.26	0.207	5e-27
Factor1	M12	2530	3.73	0.198	9.16e-74
Factor1	birth_deliverybirthcard_mode_binaryVG:M1	2410	0.0544	0.19	0.775
Factor1	birth_deliverybirthcard_mode_binaryVG:M2	2400	-0.0889	0.19	0.64
Factor1	birth_deliverybirthcard_mode_binaryVG:M3	2460	-0.161	0.19	0.396
Factor1	birth_deliverybirthcard_mode_binaryVG:M6	2480	-0.759	0.218	0.000509
Factor1	birth_deliverybirthcard_mode_binaryVG:M9	2490	-0.464	0.222	0.037
Factor1	birth_deliverybirthcard_mode_binaryVG:M12	2520	-0.743	0.212	0.000465
Factor2	(Intercept)	2250	0.0966	0.144	0.501
Factor2	clean_reads_FQ_1	2470	-0.00744	0.0176	0.673
Factor2	dna_conc	2640	-0.0619	0.0222	0.00528
Factor2	BATCH_NUMBER	2820	0.0466	0.0229	0.0418
Factor2	birth_deliverybirthcard_mode_binaryVG	2250	-1.07	0.156	6.85e-12
Factor2	M1	2400	0.0707	0.149	0.636
Factor2	M2	2380	0.176	0.149	0.238
Factor2	M3	2440	0.083	0.15	0.58
Factor2	M6	2450	0.441	0.173	0.011
Factor2	M9	2460	1.44	0.177	7.27e-16
Factor2	M12	2500	1.85	0.17	8.7e-27
Factor2	birth_deliverybirthcard_mode_binaryVG:M1	2390	0.0199	0.163	0.903
Factor2	birth_deliverybirthcard_mode_binaryVG:M2	2380	-0.0188	0.162	0.908
Factor2	birth_deliverybirthcard_mode_binaryVG:M3	2430	0.242	0.162	0.136
Factor2	birth_deliverybirthcard_mode_binaryVG:M6	2450	0.544	0.187	0.00364
Factor2	birth_deliverybirthcard_mode_binaryVG:M9	2450	0.71	0.19	0.000195
Factor2	birth_deliverybirthcard_mode_binaryVG:M12	2480	1.01	0.182	3.2e-08
Factor3	(Intercept)	2020	1.8	0.079	1.15e-102
Factor3	clean_reads_FQ_1	1980	-0.0651	0.0251	0.00969
Factor3	dna_conc	2080	-0.0681	0.0312	0.0293
Factor3	BATCH_NUMBER	1720	0.0297	0.0312	0.341
Factor3	infant_birthcard_feeding_mode_after_birthFF	2040	-1.52	0.251	1.6e-09
Factor3	infant_birthcard_feeding_mode_after_birthMF	2070	-0.35	0.343	0.308
Factor3	M1	1740	-1.18	0.0942	2.78e-34
Factor3	M2	1750	-1.95	0.0924	4.56e-88
Factor3	M3	1780	-2.13	0.0926	5.54e-103
Factor3	M6	1880	-2.59	0.108	1.83e-111
Factor3	M9	1910	-2.51	0.112	3.83e-98
Factor3	M12	1970	-1.42	0.11	2.99e-36
Factor3	infant_birthcard_feeding_mode_after_birthFF:M1	1720	0.062	0.294	0.833
Factor3	infant_birthcard_feeding_mode_after_birthMF:M1	1700	-0.208	0.385	0.59
Factor3	infant_birthcard_feeding_mode_after_birthFF:M2	1730	0.537	0.296	0.0695
Factor3	infant_birthcard_feeding_mode_after_birthMF:M2	1710	0.161	0.387	0.678
Factor3	infant_birthcard_feeding_mode_after_birthFF:M3	1760	0.744	0.287	0.00977
Factor3	infant_birthcard_feeding_mode_after_birthMF:M3	1760	-0.058	0.378	0.878
Factor3	infant_birthcard_feeding_mode_after_birthFF:M6	1860	1.31	0.312	2.99e-05
Factor3	infant_birthcard_feeding_mode_after_birthMF:M6	1820	0.246	0.43	0.568
Factor3	infant_birthcard_feeding_mode_after_birthFF:M9	1860	1.68	0.312	8.7e-08
Factor3	infant_birthcard_feeding_mode_after_birthMF:M9	1830	0.422	0.445	0.344
Factor3	infant_birthcard_feeding_mode_after_birthFF:M12	1880	1.36	0.31	1.3e-05
Factor3	infant_birthcard_feeding_mode_after_birthMF:M12	1840	0.653	0.416	0.117
Factor4	(Intercept)	1490	-0.388	0.118	0.000989
Factor4	clean_reads_FQ_1	1800	0.0903	0.0315	0.00421
Factor4	dna_conc	1890	-0.00918	0.0394	0.816
Factor4	BATCH_NUMBER	1840	0.0657	0.0417	0.115
Factor4	mother_health_smoked_one_whole_year_p18yes	1780	0.1	0.184	0.586
Factor4	M1	1570	-0.0811	0.149	0.587
Factor4	M2	1570	0.518	0.145	0.000359
Factor4	M3	1570	0.611	0.15	5.1e-05
Factor4	M6	1660	0.881	0.273	0.00126
Factor4	M9	1660	0.57	0.284	0.0447
Factor4	M12	1680	0.812	0.287	0.00466
Factor4	mother_health_smoked_one_whole_year_p18yes:M1	1600	0.43	0.217	0.048
Factor4	mother_health_smoked_one_whole_year_p18yes:M2	1600	0.127	0.214	0.554
Factor4	mother_health_smoked_one_whole_year_p18yes:M3	1620	-0.00693	0.215	0.974
Factor4	mother_health_smoked_one_whole_year_p18yes:M6	1670	-0.72	0.318	0.0237
Factor4	mother_health_smoked_one_whole_year_p18yes:M9	1670	-0.859	0.327	0.00863
Factor4	mother_health_smoked_one_whole_year_p18yes:M12	1680	-0.383	0.324	0.239
Factor5	(Intercept)	2560	0.406	0.142	0.00422
Factor5	clean_reads_FQ_1	2580	0.0358	0.023	0.119
Factor5	dna_conc	2760	-0.294	0.0286	2.57e-24
Factor5	BATCH_NUMBER	2790	0.035	0.029	0.228
Factor5	birth_deliverybirthcard_place_delivery_simplehospital	2560	-0.768	0.162	2.18e-06
Factor5	M1	2300	-0.254	0.157	0.106
Factor5	M2	2300	-0.136	0.156	0.383
Factor5	M3	2310	-0.188	0.152	0.215
Factor5	M6	2390	0.0815	0.175	0.641
Factor5	M9	2420	0.164	0.175	0.349
Factor5	M12	2470	-0.34	0.175	0.0526
Factor5	birth_deliverybirthcard_place_delivery_simplehospital:M1	2330	0.259	0.181	0.154
Factor5	birth_deliverybirthcard_place_delivery_simplehospital:M2	2330	0.256	0.179	0.154
Factor5	birth_deliverybirthcard_place_delivery_simplehospital:M3	2350	0.408	0.176	0.0204
Factor5	birth_deliverybirthcard_place_delivery_simplehospital:M6	2420	0.28	0.201	0.163
Factor5	birth_deliverybirthcard_place_delivery_simplehospital:M9	2430	0.579	0.2	0.00382
Factor5	birth_deliverybirthcard_place_delivery_simplehospital:M12	2460	0.758	0.196	0.000111
Factor6	(Intercept)	1940	0.446	0.0867	2.98e-07
Factor6	clean_reads_FQ_1	1920	0.00345	0.0268	0.897
Factor6	dna_conc	2040	0.137	0.0337	4.65e-05
Factor6	BATCH_NUMBER	1940	0.0713	0.0346	0.0393
Factor6	infant_birthcard_feeding_mode_after_birthFF	1980	-0.968	0.275	0.000431
Factor6	infant_birthcard_feeding_mode_after_birthMF	2050	-0.037	0.373	0.921
Factor6	M1	1760	-0.35	0.0991	0.000422
Factor6	M2	1770	-0.474	0.0973	1.22e-06
Factor6	M3	1790	-0.45	0.0977	4.29e-06
Factor6	M6	1870	-0.715	0.114	4.84e-10
Factor6	M9	1890	-0.577	0.119	1.38e-06
Factor6	M12	1950	-0.521	0.118	1.01e-05
Factor6	infant_birthcard_feeding_mode_after_birthFF:M1	1730	1.04	0.309	0.000801
Factor6	infant_birthcard_feeding_mode_after_birthMF:M1	1700	-0.0865	0.404	0.831
Factor6	infant_birthcard_feeding_mode_after_birthFF:M2	1740	1.24	0.311	6.84e-05
Factor6	infant_birthcard_feeding_mode_after_birthMF:M2	1710	-0.0955	0.407	0.814
Factor6	infant_birthcard_feeding_mode_after_birthFF:M3	1760	1.26	0.303	3.07e-05
Factor6	infant_birthcard_feeding_mode_after_birthMF:M3	1760	0.0253	0.398	0.949
Factor6	infant_birthcard_feeding_mode_after_birthFF:M6	1840	1.76	0.33	1.04e-07
Factor6	infant_birthcard_feeding_mode_after_birthMF:M6	1790	0.581	0.454	0.2
Factor6	infant_birthcard_feeding_mode_after_birthFF:M9	1830	1.35	0.33	4.49e-05
Factor6	infant_birthcard_feeding_mode_after_birthMF:M9	1800	-0.102	0.47	0.828
Factor6	infant_birthcard_feeding_mode_after_birthFF:M12	1860	1.18	0.328	0.00032
Factor6	infant_birthcard_feeding_mode_after_birthMF:M12	1810	0.203	0.44	0.644
Factor8	(Intercept)	2050	0.888	0.0899	1.64e-22
Factor8	clean_reads_FQ_1	2020	0.0104	0.0289	0.719
Factor8	dna_conc	2070	-0.0218	0.0357	0.542
Factor8	BATCH_NUMBER	1680	0.077	0.0352	0.0289
Factor8	infant_birthcard_feeding_mode_after_birthFF	2060	0.137	0.286	0.633
Factor8	infant_birthcard_feeding_mode_after_birthMF	2080	0.198	0.391	0.612
Factor8	M1	1790	-0.854	0.109	7.83e-15
Factor8	M2	1800	-1.18	0.107	1.56e-27
Factor8	M3	1830	-1.35	0.107	3.07e-35
Factor8	M6	1920	-1.22	0.124	4.25e-22
Factor8	M9	1950	-0.881	0.129	1.28e-11
Factor8	M12	2000	-0.791	0.127	5.64e-10
Factor8	infant_birthcard_feeding_mode_after_birthFF:M1	1780	0.528	0.34	0.12
Factor8	infant_birthcard_feeding_mode_after_birthMF:M1	1770	-0.276	0.446	0.537
Factor8	infant_birthcard_feeding_mode_after_birthFF:M2	1790	0.768	0.342	0.0248
Factor8	infant_birthcard_feeding_mode_after_birthMF:M2	1770	0.594	0.448	0.186
Factor8	infant_birthcard_feeding_mode_after_birthFF:M3	1810	0.495	0.332	0.137
Factor8	infant_birthcard_feeding_mode_after_birthMF:M3	1820	0.0716	0.437	0.87
Factor8	infant_birthcard_feeding_mode_after_birthFF:M6	1910	0.683	0.36	0.0579
Factor8	infant_birthcard_feeding_mode_after_birthMF:M6	1880	0.499	0.497	0.315
Factor8	infant_birthcard_feeding_mode_after_birthFF:M9	1910	-0.306	0.36	0.395
Factor8	infant_birthcard_feeding_mode_after_birthMF:M9	1890	-0.0109	0.514	0.983
Factor8	infant_birthcard_feeding_mode_after_birthFF:M12	1930	-0.664	0.357	0.0631
Factor8	infant_birthcard_feeding_mode_after_birthMF:M12	1900	0.116	0.48	0.809
Factor10	(Intercept)	1910	0.842	0.134	3.7e-10
Factor10	clean_reads_FQ_1	1890	-0.0173	0.031	0.576
Factor10	dna_conc	1940	-0.0219	0.0384	0.568
Factor10	BATCH_NUMBER	1530	0.0513	0.0378	0.175
Factor10	infant_birthcard_feeding_mode_after_birthFF	414	-0.409	0.136	0.00287
Factor10	infant_birthcard_feeding_mode_after_birthMF	419	-0.388	0.173	0.025
Factor10	mother_birthcard_paritySecond	1920	0.0833	0.2	0.677
Factor10	mother_birthcard_parityThird+	1890	0.0473	0.225	0.834
Factor10	M1	1680	-0.939	0.159	4.71e-09
Factor10	M2	1680	-1.15	0.159	8.46e-13
Factor10	M3	1710	-1.15	0.157	4.13e-13
Factor10	M6	1800	-0.972	0.183	1.18e-07
Factor10	M9	1810	-0.194	0.19	0.309
Factor10	M12	1860	-0.43	0.182	0.0181
Factor10	mother_birthcard_paritySecond:M1	1690	0.159	0.244	0.513
Factor10	mother_birthcard_parityThird+:M1	1640	0.156	0.279	0.576
Factor10	mother_birthcard_paritySecond:M2	1700	0.132	0.239	0.581
Factor10	mother_birthcard_parityThird+:M2	1650	0.298	0.278	0.283
Factor10	mother_birthcard_paritySecond:M3	1720	0.163	0.237	0.492
Factor10	mother_birthcard_parityThird+:M3	1690	0.304	0.276	0.27
Factor10	mother_birthcard_paritySecond:M6	1810	-0.179	0.268	0.505
Factor10	mother_birthcard_parityThird+:M6	1780	0.066	0.315	0.834
Factor10	mother_birthcard_paritySecond:M9	1810	-0.622	0.273	0.0228
Factor10	mother_birthcard_parityThird+:M9	1780	-0.778	0.32	0.0152
Factor10	mother_birthcard_paritySecond:M12	1830	-0.815	0.259	0.00168
Factor10	mother_birthcard_parityThird+:M12	1800	-1.27	0.307	4.01e-05

## Sheet: Table S23.
Table S23. Cross-sectional associations of infant-specific phenotypes with infant alpha diversity (green: FDR<0.05)
Alpha Diversity Index	Phenotype Group	Phenotype	Categories (where applicable)	Sample Size, n	Estimate	Standard Error	Degrees of Freedom	T-value	P-value	FDR
shannon	infant_birthcard	infant_birthcard_feeding_mode_after_birth	FF	2077	0.265958	0.0574533	414.693	4.62912	4.92e-06	0.000605091
shannon	infant_ffq	infant_ffq_ever_never_breastfed	never_BF	2830	0.238338	0.0540935	543.326	4.40604	1.27e-05	0.000780301
shannon	birth_delivery	birth_delivery_mode_simple	VG	2812	0.212589	0.0526372	585.355	4.03875	6.09e-05	0.00249659
shannon	mother_birthcard	mother_birthcard_parity		2138	0.0773742	0.0206679	442.775	3.74368	0.000205251	0.00631147
shannon	birth_deliverybirthcard	birth_deliverybirthcard_mode_binary	VG	2828	0.125536	0.0420592	623.01	2.98475	0.0029493	0.0725528
shannon	infant_birthcard	infant_birthcard_paediatrician_called	yes	1776	-0.110274	0.0384739	378.645	-2.8662	0.00438623	0.0770724
shannon	mother_birthcard	mother_birthcard_rhesus_d_factor	positive	1769	0.141972	0.048697	372.168	2.91543	0.00376702	0.0770724
shannon	mother_lifelinesbirthcards	mother_lifelinesbirthcards_prepreg_bmi_kg_m2		1714	0.0539713	0.0191959	374.761	2.8116	0.00518872	0.0797766
shannon	mother_birthcardhealth	mother_birthcardhealth_gravidity		2450	0.0482	0.018196	548.801	2.64894	0.00830703	0.113529
shannon	birth_birthcard	birth_birthcard_duration_active_deliberate_pushing_min		1089	-0.061837	0.0247105	238.798	-2.50246	0.0130031	0.122267
shannon	birth_delivery	birth_delivery_mode_complex	spon_contrac_VG	2127	0.1941	0.0776406	428.863	2.49998	0.0127927	0.122267
shannon	infant_asq	infant_asq_gm_score_m12		1518	0.0560379	0.0226474	291.478	2.47436	0.0139166	0.122267
shannon	mother_birthcard	mother_birthcard_med_del_spinal	yes	1550	-0.158306	0.0613173	293.73	-2.58175	0.0103146	0.122267
shannon	mother_ffq	mother_ffq_pattern_pescatarian_asian_foods		1220	-0.056248	0.022352	220.657	-2.51647	0.012565	0.122267
shannon	birth_delivery	birth_delivery_mode_simple	pre_labor_CS	2812	0.191221	0.081388	633.895	2.3495	0.0191044	0.156656
shannon	infant_asq	infant_asq_fm_score_m6		1611	0.0471307	0.0204001	313.302	2.31032	0.0215196	0.165432
shannon	birth_birthcard	birth_birthcard_place_delivery_complex	hospital	2295	-0.0909953	0.0412299	451.534	-2.20702	0.0278148	0.201248
shannon	infant_birthcard	infant_birthcard_apgar_score_10min		1793	0.070028	0.032106	380.868	2.18115	0.0297832	0.203518
shannon	birth_delivery	birth_delivery_mode_complex	induction_VG	2127	0.182179	0.0847617	438.452	2.1493	0.032157	0.208174
shannon	mother_ffq	mother_ffq_aMED_score		1201	-0.050538	0.0237404	224.677	-2.12878	0.034361	0.21132
shannon	infant_growth	infant_growth_standardized_length_slope_cm		2343	0.0339695	0.0167144	492.505	2.03235	0.0426544	0.249833
shannon	infant_asq	infant_asq_com_score_m12		1522	0.0436468	0.0219529	278.65	1.9882	0.0477679	0.255734
shannon	mother_ffq	mother_ffq_pattern_breakfast_foods		1220	-0.0451216	0.0226807	233.616	-1.98943	0.0478202	0.255734
shannon	birth_delivery	birth_delivery_mode_complex	induction_vaccum_VG	2127	0.254258	0.129368	414.69	1.96539	0.0500365	0.256437
shannon	birth_delivery	birth_delivery_mode_complex	planned_CS	2127	0.192172	0.1007	445.911	1.90837	0.0569848	0.269582
shannon	infant_health	infant_health_food_allergy	yes	2402	0.105165	0.0548883	452.036	1.91598	0.0559979	0.269582
shannon	infant_birthcard	infant_birthcard_hospital_stay_after_birth_hrs		891	-0.0600664	0.0320776	199.452	-1.87253	0.0625961	0.28516
shannon	mother_ffq	mother_ffq_pattern_dairy_pancakes_crackers_sauce		1220	0.0414958	0.0227275	198.184	1.8258	0.0693858	0.304802
shannon	birth_delivery	birth_delivery_mode_complex	spon_contrac_vaccum_VG	2127	0.182297	0.105623	437.7	1.72592	0.0850666	0.324798
shannon	infant_asq	infant_asq_psoc_score_m12		1515	-0.0358376	0.0222439	283.479	-1.61112	0.108266	0.324798
shannon	infant_growth	infant_growth_birth_weight_kg		2668	0.0258071	0.0156059	536.024	1.65368	0.0987785	0.324798
shannon	infant_growth	infant_growth_standardized_weight_slope_kg		2668	0.0256221	0.0154996	563.319	1.65308	0.0988709	0.324798
shannon	infant_health	infant_health_eczema_diagnosis_relaxed	yes	2258	-0.0677455	0.0393278	419.254	-1.72259	0.0857008	0.324798
shannon	infant_health	infant_health_eczema_diagnosis_strict	yes	766	-0.115383	0.0687894	120.05	-1.67734	0.0960782	0.324798
shannon	infant_misc	infant_misc_sex	male	2915	-0.0479802	0.0295211	629.522	-1.62528	0.104603	0.324798
shannon	mother_birthcard	mother_birthcard_age_at_delivery		2892	0.0254452	0.0148651	655.046	1.71174	0.0874184	0.324798
shannon	mother_deliverybirthcard	mother_deliverybirthcard_med_del_epidural	yes	2464	-0.064716	0.039343	532.201	-1.64492	0.100577	0.324798
shannon	mother_ffq	mother_ffq_pattern_meat_and_fat		1220	0.0371936	0.0230162	207.495	1.61598	0.107619	0.324798
shannon	mother_ffq	mother_ffq_pattern_processed_foods		1220	0.0393304	0.0225814	221.453	1.74172	0.0829464	0.324798
shannon	mother_ffq	mother_ffq_pattern_vegetarian_foods		1220	-0.0404031	0.0229927	229.5	-1.75721	0.0802155	0.324798
shannon	mother_geneticsbirthcard	mother_geneticsbirthcard_blood_group	O	2457	-0.0571856	0.0352528	527.247	-1.62216	0.105367	0.324798
shannon	infant_birthcard	infant_birthcard_apgar_score_5min		2061	0.0385338	0.0241814	449.806	1.59353	0.111744	0.32725
shannon	birth_birthcard	birth_birthcard_place_delivery_hospital	groningen_academic	1562	-0.104446	0.0663834	322.805	-1.57338	0.11661	0.33324
shannon	infant_health	infant_health_food_allergy_cowmilk	yes	2402	0.114505	0.0738925	463.831	1.54961	0.121917	0.33324
shannon	mother_delivery	mother_delivery_del_pain_IV_pump_remifentanyl	yes	2050	-0.119224	0.0766528	401.62	-1.55538	0.120643	0.33324
shannon	family_pets	family_pets_cat	yes	2523	-0.047441	0.0319489	528.709	-1.4849	0.138166	0.369443
shannon	infant_birthcard	infant_birthcard_apgar_score_1min		2045	0.0304189	0.0207967	439.543	1.46268	0.14427	0.377559
shannon	birth_birthcard	birth_birthcard_place_delivery_hospital	groningen_peripheral	1562	-0.0927621	0.0648947	323.082	-1.42943	0.153848	0.386191
shannon	infant_asq	infant_asq_total_score_m6		1608	0.0278387	0.0194585	319.419	1.43067	0.153503	0.386191
shannon	infant_asq	infant_asq_gm_score_m6		1618	0.0281596	0.0199148	312.44	1.414	0.158358	0.38956
shannon	birth_deliverybirthcard	birth_deliverybirthcard_place_delivery_simple	hospital	2820	-0.0480213	0.0352924	559.575	-1.36067	0.174166	0.411971
shannon	mother_delivery	mother_delivery_within_month_hosp	yes	2053	-0.0900565	0.0657049	357.342	-1.37062	0.171354	0.411971
shannon	infant_asq	infant_asq_ps_score_m6		1615	0.027448	0.0210974	318.633	1.30102	0.194193	0.442329
shannon	infant_asq	infant_asq_total_score_m12		1485	0.0278858	0.021384	275.415	1.30405	0.193305	0.442329
shannon	infant_health	infant_health_airway_nose_ear_throat_infection_freq	1_once_twice	1191	0.072848	0.0566586	192.105	1.28573	0.200084	0.44746
shannon	mother_education	mother_education_p18		1893	-0.0334994	0.026613	435.539	-1.25876	0.208791	0.458595
shannon	infant_birthcard	infant_birthcard_warmth_therapy	yes	940	-0.0836349	0.0713272	178.754	-1.17255	0.242535	0.497198
shannon	infant_scorad	infant_scorad_family_history_allergic_disease	yes	1356	0.0574181	0.0488492	280.643	1.17541	0.240825	0.497198
shannon	mother_birthcard	mother_birthcard_del_complications_long_labor_O63	yes	1692	-0.0880612	0.0752037	354.626	-1.17097	0.242397	0.497198
shannon	mother_deliverybirthcard	mother_deliverybirthcard_preg_comp_hypertension	yes	2740	-0.0689928	0.057918	667.629	-1.19121	0.233993	0.497198
shannon	birth_birthcard	birth_birthcard_place_delivery_hospital	other	1562	-0.0702133	0.0614993	334.079	-1.14169	0.254399	0.498804
shannon	infant_birthcard	infant_birthcard_feeding_mode_after_birth	MF	2077	0.0818319	0.0714205	433.41	1.14578	0.25252	0.498804
shannon	mother_birthcard	mother_birthcard_duration_water_broken_min		1869	-0.0208955	0.0184698	365.728	-1.13133	0.258657	0.498804
shannon	mother_ffq	mother_ffq_pattern_dutch_foods		1220	0.0255987	0.0226482	229.613	1.13027	0.259541	0.498804
shannon	infant_birthcard	infant_birthcard_breech	yes	1959	-0.0872351	0.0800514	411.546	-1.08974	0.276466	0.515232
shannon	infant_health	infant_health_breathing_difficulties	yes	2131	-0.0421357	0.0385665	394.442	-1.09255	0.275259	0.515232
shannon	mother_ffq	mother_ffq_pattern_dutch_breakfast		1220	0.024171	0.0231269	231.202	1.04515	0.297045	0.545322
shannon	mother_deliverybirthcard	mother_deliverybirthcard_del_induced_labour_IV_contraction_inducers	yes	2033	-0.0376006	0.0365169	423.845	-1.02968	0.303749	0.549429
shannon	mother_health	mother_health_smoked_one_whole_year_p18	yes	1893	-0.0500323	0.0490648	442.413	-1.01972	0.308419	0.549791
shannon	birth_birthcard	birth_birthcard_place_delivery_complex	hospitalPK	2295	-0.0625603	0.0637205	503.626	-0.981793	0.326673	0.574011
shannon	mother_birthcard	mother_birthcard_del_rupture_grade		1768	0.0226511	0.0235618	377.021	0.961349	0.336993	0.583805
shannon	mother_genetics	mother_genetics_blood_group_genotype	B/B	1720	-0.271561	0.286675	350.763	-0.947278	0.344149	0.587921
shannon	family_pets	family_pets_any	yes	2491	-0.0301687	0.0323926	528.395	-0.931346	0.3521	0.591859
shannon	infant_deliverybirthcard	infant_deliverybirthcard_meconium_amniotic_fluid	yes	2671	-0.0410327	0.0448183	563.135	-0.915535	0.360303	0.591859
shannon	mother_birthcard	mother_birthcard_del_vacuum_pump	yes	2131	-0.0546632	0.0597683	458.755	-0.914585	0.36089	0.591859
shannon	birth_delivery	birth_delivery_mode_complex	pre_labor_emergency_CS	2127	0.174357	0.199551	614.552	0.873745	0.382599	0.619206
shannon	mother_birthcardself	mother_birthcardself_gestational_age_weeks		2915	0.0117686	0.0147628	630.49	0.797176	0.425649	0.679933
shannon	family_pets	family_pets_dog	yes	2523	0.0294757	0.0410071	542.212	0.718794	0.472577	0.735785
shannon	infant_growth	infant_growth_standardized_head_circumf_slope_cm		1786	-0.0137219	0.0188461	372.607	-0.728101	0.467009	0.735785
shannon	infant_health	infant_health_ear_infection	yes	1911	0.0488755	0.0698165	297.454	0.700057	0.484439	0.744825
shannon	infant_asq	infant_asq_psoc_score_m6		1615	-0.0134751	0.0199185	321.094	-0.676509	0.499204	0.749815
shannon	mother_birthcardself	mother_birthcardself_gestational_age_catg		2915	0.0178878	0.0264978	643.555	0.675065	0.499877	0.749815
shannon	family_living	family_living_situation	other	2271	-0.0676687	0.101849	478.553	-0.664402	0.506753	0.750971
shannon	mother_food	mother_food_avoid_gluten_preg	yes	1662	-0.0422634	0.0672734	356.331	-0.628233	0.530254	0.767308
shannon	mother_income	mother_income_net_p18		1767	-0.0167043	0.0263198	393.789	-0.634668	0.526014	0.767308
shannon	mother_ffq	mother_ffq_energy_kcal_m2		1220	-0.0139553	0.0227811	210.328	-0.612583	0.540814	0.77349
shannon	mother_geneticsbirthcard	mother_geneticsbirthcard_blood_group	B	2457	0.0365456	0.0610854	556.162	0.59827	0.549903	0.777449
shannon	mother_deliveryhealth	mother_deliveryhealth_preg_complaint_gastroenteritis	yes	2457	0.0218767	0.0395449	497.797	0.553212	0.580367	0.803062
shannon	mother_genetics	mother_genetics_blood_group_genotype	O/O	1720	-0.0493665	0.0893772	342.203	-0.552338	0.581077	0.803062
shannon	mother_ffq	mother_ffq_pattern_eggs_other_meats_white_wine		1220	-0.01222	0.0226101	220.236	-0.540468	0.58942	0.805541
shannon	mother_health	mother_health_exposure_secondhand_smoke_while_pregnant_first_trimester_p18	yes	1614	0.0242345	0.045847	339.153	0.528594	0.597433	0.807519
shannon	mother_ffq	mother_ffq_pattern_snacks_and_alcoholic_drinks		1220	-0.0119716	0.0230481	204.346	-0.519416	0.604033	0.807566
shannon	infant_health	infant_health_airway_nose_ear_throat_infection_freq	2_three_to_five	1191	-0.0537245	0.108768	197.894	-0.493935	0.6219	0.822513
shannon	mother_deliverybirthcard	mother_deliverybirthcard_del_induced_balloon	yes	626	-0.0268177	0.0604271	114.58	-0.443802	0.658023	0.86103
shannon	infant_asq	infant_asq_ps_score_m12		1487	-0.00871066	0.0224382	273.567	-0.388207	0.698165	0.873501
shannon	infant_health	infant_health_airway_nose_ear_throat_infection_freq	3_six_times_more	1191	-0.0721074	0.191682	217.538	-0.376182	0.707148	0.873501
shannon	infant_health	infant_health_thrush_m4	yes	1924	0.0323957	0.0818889	324.574	0.395605	0.692656	0.873501
shannon	mother_birthcard	mother_birthcard_med_del_oxytocin_ana_H01BB	yes	1842	0.0163737	0.0416796	405.789	0.392848	0.694638	0.873501
shannon	mother_deliverybirthcard	mother_deliverybirthcard_del_induced_breaking_membrane	yes	577	0.0279735	0.0682395	99.6692	0.409931	0.682736	0.873501
shannon	mother_genetics	mother_genetics_blood_group_genotype	A/O	1720	-0.033381	0.0897464	338.858	-0.371949	0.710164	0.873501
shannon	family_living	family_living_situation	flat	2271	-0.0447821	0.127812	516.099	-0.350375	0.7262	0.879819
shannon	mother_genetics	mother_genetics_blood_group_genotype	B/O	1720	0.0370847	0.107203	346.129	0.345929	0.729606	0.879819
shannon	mother_genetics	mother_genetics_blood_group_genotype	A/B	1720	-0.0420428	0.139761	314.205	-0.300819	0.763752	0.912053
shannon	infant_asq	infant_asq_com_score_m6		1618	0.00481939	0.0201819	322.549	0.238797	0.811414	0.914549
shannon	infant_growth	infant_growth_birth_length_cm		2343	0.00420304	0.0168533	471.705	0.249391	0.803167	0.914549
shannon	mother_deliverybirthcard	mother_deliverybirthcard_del_induced_IV_drip	yes	521	-0.016085	0.0696254	79.7734	-0.231022	0.817889	0.914549
shannon	mother_deliveryhealth	mother_deliveryhealth_preg_complaint_uti	yes	2458	-0.0103302	0.0398272	545.792	-0.259375	0.795444	0.914549
shannon	mother_deliveryhealth	mother_deliveryhealth_preg_complaint_vaginal_fungal_inf	yes	2458	0.0101115	0.0365305	546.81	0.276797	0.782041	0.914549
shannon	mother_geneticsbirthcard	mother_geneticsbirthcard_blood_group	AB	2457	0.0245119	0.103418	418.057	0.237017	0.81276	0.914549
shannon	mother_health	mother_health_smoking_duration_p18		525	0.0072837	0.0303845	112.012	0.239718	0.810987	0.914549
shannon	birth_birthcard	birth_birthcard_total_duration_delivery_min		767	0.00608671	0.0296035	148.027	0.205608	0.83738	0.927907
shannon	infant_asq	infant_asq_fm_score_m12		1520	-0.00344574	0.0234572	286.282	-0.146895	0.883318	0.970073
shannon	infant_growth	infant_growth_birth_head_circumf_cm		1786	-0.00183416	0.0189473	353.381	-0.096803	0.922938	0.979703
shannon	infant_health	infant_health_airway_infections	yes	1911	-0.00855392	0.0778249	316.425	-0.109912	0.912548	0.979703
shannon	infant_health	infant_health_nose_problems_eye_irritation	yes	2131	-0.00538819	0.0505653	379.543	-0.106559	0.915195	0.979703
shannon	infant_health	infant_health_vomiting_m4	yes	1924	-0.00434548	0.0454894	373.138	-0.0955272	0.923947	0.979703
shannon	birth_delivery	birth_delivery_mode_complex	spon_contrac_emergency_CS	2127	0.00814412	0.1007	422.758	0.0808748	0.93558	0.982479
shannon	family_living	family_living_situation	house	2271	-0.00624977	0.0866658	489.809	-0.0721135	0.942541	0.982479
shannon	infant_health	infant_health_itchy_skin_rash	yes	2131	0.000981104	0.0532324	364.529	0.0184306	0.985305	0.985305
shannon	mother_birthcard	mother_birthcard_med_del_anaesthetic_opioid_N01AH	yes	1550	-0.00322204	0.0880514	259.207	-0.0365927	0.970838	0.985305
shannon	mother_birthcard	mother_birthcard_water_spontaneously_broken	yes	1525	-0.000825382	0.0420382	295.214	-0.0196341	0.984349	0.985305
shannon	mother_deliverybirthcardhealth	mother_deliverybirthcardhealth_preg_complaint_hyperemesis_gravidarum	yes	2850	0.00224913	0.0387196	622.568	0.0580876	0.953697	0.985305
shannon	mother_food	mother_food_avoid_dairy_preg	yes	1674	0.00222113	0.0581161	369.969	0.0382188	0.969534	0.985305

## Sheet: Table S24.
Table S24. Longitudinal associations of infant-specific phenotypes with infant alpha diversity (green: FDR<0.05)
Alpha Diversity Index	Phenotype Group	Phenotype	Categories (where applicable)	Sample Size, n	Estimate	Standard Error	P-value	FDR	converged
shannon	infant_ffq	infant_ffq_feeding_mode_simple	excl_FF	1670	0.219353	0.0349367	4.59e-10	3.17e-08	TRUE
shannon	infant_ffq	infant_ffq_feeding_mode_complex	FF	2075	0.209933	0.0339719	8.02e-10	3.17e-08	TRUE
shannon	infant_ffq	infant_ffq_stopped_breastfeeding	no	1880	-0.325246	0.0550577	4.25e-09	1.12e-07	TRUE
shannon	infant_rome	infant_rome_stool_freq_last_month		1683	-0.0857952	0.0155346	3.99e-08	7.88e-07	TRUE
shannon	infant_BITSS	infant_BITSS		2057	-0.0840547	0.0163743	3.17e-07	5.01e-06	TRUE
shannon	infant_med	infant_med_vitaminK	yes	1954	-0.123385	0.0343433	0.000337184	0.00443959	TRUE
shannon	infant_ffq	infant_ffq_feeding_mode_complex	MF	2075	0.110144	0.0326339	0.00075433	0.0077452	TRUE
shannon	infant_rome	infant_rome_stool_structure		1684	-0.0628044	0.0186592	0.000784324	0.0077452	TRUE
shannon	infant_rome	infant_rome_mucus_stool_last_week		1658	-0.0546067	0.020932	0.00918858	0.0806553	TRUE
shannon	infant_ffq	infant_ffq_stopped_breastfeeding	yes	1880	-0.139103	0.0588073	0.0181313	0.130215	TRUE
shannon	infant_ffq	infant_ffq_group_tea_gday		626	0.0765946	0.0318968	0.0167216	0.130215	TRUE
shannon	infant_health	infant_health_known_health_problem	yes	1041	-0.0768986	0.0336976	0.0227428	0.149723	TRUE
shannon	infant_ffq	infant_ffq_breastfeeding_freq_weighted		633	-0.0800757	0.0356887	0.0253047	0.152049	TRUE
shannon	infant_ffq	infant_ffq_energy_kcalday_item_sum_recal		626	0.0885001	0.0398798	0.0269453	0.152049	TRUE
shannon	infant_ffq	infant_ffq_group_nuts_gday		626	0.0745672	0.0349673	0.0334837	0.176348	TRUE
shannon	infant_ffq	infant_ffq_formula_follow_on_freq_weighted		633	0.0680819	0.0362507	0.0609774	0.301076	TRUE
shannon	infant_growth	infant_growth_overweight	yes	2311	0.0890106	0.0507051	0.0793386	0.368691	TRUE
shannon	infant_health	infant_health_wheeze	yes	551	0.131772	0.080211	0.101196	0.397678	TRUE
shannon	infant_ffq	infant_ffq_gday_item_sum_recal		626	0.0618717	0.0381048	0.105098	0.397678	TRUE
shannon	infant_ffq	infant_ffq_group_fats_and_oils_gday		626	0.0651641	0.0393925	0.0987428	0.397678	TRUE
shannon	infant_ffq	infant_ffq_group_pancake_gday		422	0.0588591	0.0362523	0.105712	0.397678	TRUE
shannon	infant_ffq	infant_ffq_group_egg_gday		626	0.050747	0.0326816	0.121147	0.435028	TRUE
shannon	infant_ffq	infant_ffq_vitK_quant_amount		830	-0.0325872	0.0230651	0.158234	0.484213	TRUE
shannon	infant_ffq	infant_ffq_fat_energy_perc_recal		627	0.0491985	0.0337022	0.145007	0.484213	TRUE
shannon	infant_ffq	infant_ffq_group_breads_gday		626	0.0519514	0.0374805	0.166369	0.484213	TRUE
shannon	infant_ffq	infant_ffq_group_legumes_gday		626	0.0417191	0.0298109	0.162331	0.484213	TRUE
shannon	infant_ffq	infant_ffq_group_sugar_sweets_gday		626	0.0495869	0.0346935	0.15358	0.484213	TRUE
shannon	infant_asq	infant_asq_gm_score		385	0.0438178	0.0319741	0.17162	0.484213	TRUE
shannon	infant_ffq	infant_ffq_fiber_energy_perc_recal		627	-0.0424215	0.0330256	0.199588	0.543705	TRUE
shannon	infant_med	infant_med_vitaminD	yes	1976	-0.0681111	0.0549031	0.214946	0.566024	TRUE
shannon	infant_ffq	infant_ffq_group_pastry_gday		422	0.0394191	0.0348872	0.259581	0.574598	TRUE
shannon	infant_ffq	infant_ffq_group_savoury_snacks_gday		422	-0.0510617	0.0443895	0.251108	0.574598	TRUE
shannon	infant_ffq	infant_ffq_group_vegetables_gday		626	0.0285668	0.0253464	0.260293	0.574598	TRUE
shannon	infant_ffq	infant_ffq_fresh_fruits	yes	211	0.150662	0.13107	0.25795	0.574598	TRUE
shannon	infant_asq	infant_asq_ps_score		381	-0.0383771	0.0341351	0.261842	0.574598	TRUE
shannon	infant_sleep	infant_sleep_night_hours		439	0.0329485	0.0289058	0.255157	0.574598	TRUE
shannon	infant_ffq	infant_ffq_vitD_quant_amount		1262	0.0214942	0.0217305	0.322863	0.613319	TRUE
shannon	infant_ffq	infant_ffq_carbs_energy_perc_recal		627	-0.0279041	0.0282696	0.324112	0.613319	TRUE
shannon	infant_ffq	infant_ffq_group_fish_gday		626	0.0307756	0.0321974	0.339641	0.613319	TRUE
shannon	infant_ffq	infant_ffq_group_fruits_gday		626	0.0261474	0.0266382	0.326811	0.613319	TRUE
shannon	infant_ffq	infant_ffq_group_sweet_drinks_gday		626	0.0328434	0.0345004	0.341595	0.613319	TRUE
shannon	infant_ffq	infant_ffq_ice_cream_freq_weighted		420	-0.0395797	0.0414702	0.340792	0.613319	TRUE
shannon	infant_ffq	infant_ffq_milk_buttermilk_freq_weighted		203	-0.0395797	0.0414702	0.340792	0.613319	FALSE
shannon	infant_ffq	infant_ffq_whipped_cream_freq_weighted		202	-0.0395797	0.0414702	0.340792	0.613319	FALSE
shannon	infant_asq	infant_asq_psoc_score		385	-0.0296483	0.0319198	0.353751	0.62103	TRUE
shannon	infant_sleep	infant_sleep_times_awake_night		436	-0.0263128	0.0303108	0.385965	0.662853	TRUE
shannon	infant_sleep	infant_sleep_pattern_problem		439	-0.0333027	0.0402022	0.408045	0.685862	TRUE
shannon	infant_med	infant_med_analgesics_N02	yes	1925	-0.0317375	0.040752	0.436218	0.717941	TRUE
shannon	infant_ffq	infant_ffq_group_grain_products_and_rice_gday		626	0.0206978	0.0279142	0.45877	0.734562	TRUE
shannon	infant_ffq	infant_ffq_group_meat_substitute_gday		626	0.0333236	0.045563	0.464913	0.734562	TRUE
shannon	infant_cry	infant_cry_prev_week_avg_cry_time_per_day_min		1877	0.00984895	0.0150575	0.513153	0.794884	TRUE
shannon	infant_health	infant_health_eczema_questionnaire	yes	761	0.0360788	0.0619068	0.56026	0.799086	TRUE
shannon	infant_health	infant_health_food_allergy	yes	980	0.0402645	0.080309	0.616253	0.799086	TRUE
shannon	infant_ffq	infant_ffq_group_meat_gday		626	0.0194526	0.034659	0.574888	0.799086	TRUE
shannon	infant_ffq	infant_ffq_group_pasta_gday		626	0.0174868	0.0344718	0.612195	0.799086	TRUE
shannon	infant_ffq	infant_ffq_group_water_gday		626	0.0150184	0.0338495	0.657476	0.799086	TRUE
shannon	infant_ffq	infant_ffq_chocolate_freq_weighted		201	0.0150184	0.0338495	0.657476	0.799086	FALSE
shannon	infant_ffq	infant_ffq_custard_or_pudding_freq_weighted		420	0.0241273	0.0406175	0.553033	0.799086	TRUE
shannon	infant_ffq	infant_ffq_yoghurt_or_quark_freq_weighted		420	-0.0181655	0.0337132	0.590484	0.799086	TRUE
shannon	infant_cry	infant_cry_prev_week_cry_more_3h_per_day	yes	1898	-0.0212748	0.0445458	0.633007	0.799086	TRUE
shannon	infant_growth	infant_growth_weight_kg		2668	0.0138157	0.0302334	0.647738	0.799086	TRUE
shannon	infant_asq	infant_asq_com_score		385	0.0176756	0.033992	0.60347	0.799086	TRUE
shannon	infant_asq	infant_asq_fm_score		386	-0.0198303	0.0344173	0.564951	0.799086	TRUE
shannon	infant_rome	infant_rome_sudden_inconsolable_crying_fits	yes	1683	-0.0162504	0.0342147	0.634897	0.799086	TRUE
shannon	infant_IGSQ	infant_IGSQ_score_catg	1_medium_high_GI_distress	280	0.0305079	0.0658837	0.6437	0.799086	TRUE
shannon	infant_IGSQ	infant_IGSQ_score		280	0.0173923	0.0410988	0.672503	0.804965	TRUE
shannon	infant_health	infant_health_itchy_skin_rash	yes	551	0.0280492	0.0846887	0.740662	0.831446	TRUE
shannon	infant_scorad	infant_scorad_measurement		788	0.00933465	0.0302546	0.757773	0.831446	TRUE
shannon	infant_ffq	infant_ffq_cmpltry_food_cdc	yes	698	-0.0219624	0.0668142	0.742518	0.831446	TRUE
shannon	infant_food	infant_food_solid_intro	yes	250	-0.0219624	0.0668142	0.742518	0.831446	FALSE
shannon	infant_growth	infant_growth_head_circumf_cm		1786	-0.0117946	0.0376407	0.75406	0.831446	TRUE
shannon	infant_rome	infant_rome_regurgitation	yes	1685	-0.0104618	0.0296783	0.724513	0.831446	TRUE
shannon	infant_ffq	infant_ffq_protein_energy_perc_recal		627	0.00634205	0.0235709	0.787999	0.852766	TRUE
shannon	infant_ffq	infant_ffq_group_dairy_gday		422	0.00733933	0.0332977	0.825724	0.879618	TRUE
shannon	infant_asq	infant_asq_total_score		380	-0.00617182	0.0317578	0.846049	0.879618	TRUE
shannon	infant_sleep	infant_sleep_day_hours		439	0.00568774	0.0293032	0.846215	0.879618	TRUE
shannon	infant_growth	infant_growth_length_cm		2343	0.00560534	0.0351263	0.873231	0.895912	TRUE
shannon	infant_ffq	infant_ffq_group_potatoes_gday		626	-0.000920612	0.0306842	0.976077	0.988591	TRUE
shannon	infant_ffq	infant_ffq_group_cheese_gday		626	-0.000233054	0.0349929	0.994689	0.994689	TRUE

[truncated: 37 more sheets: Table S25., Table S26., Table S27., Table S28., Table S29., Table S30., Table S31., Table S32., Table S33., Table S34., Table S35., Table S36., Table S37., Table S38., Table S39., Table S40., Table S41., Table S42., Table S43., Table S44. …]
