# Supplementary figures and images for: Pregnancy and Early Life Gut Microbiome: Influencing Factors and Health Implications
Source: Research Square preprint supplement (doi:10.21203/rs.3.rs-5334252/v1), 2024-10-31

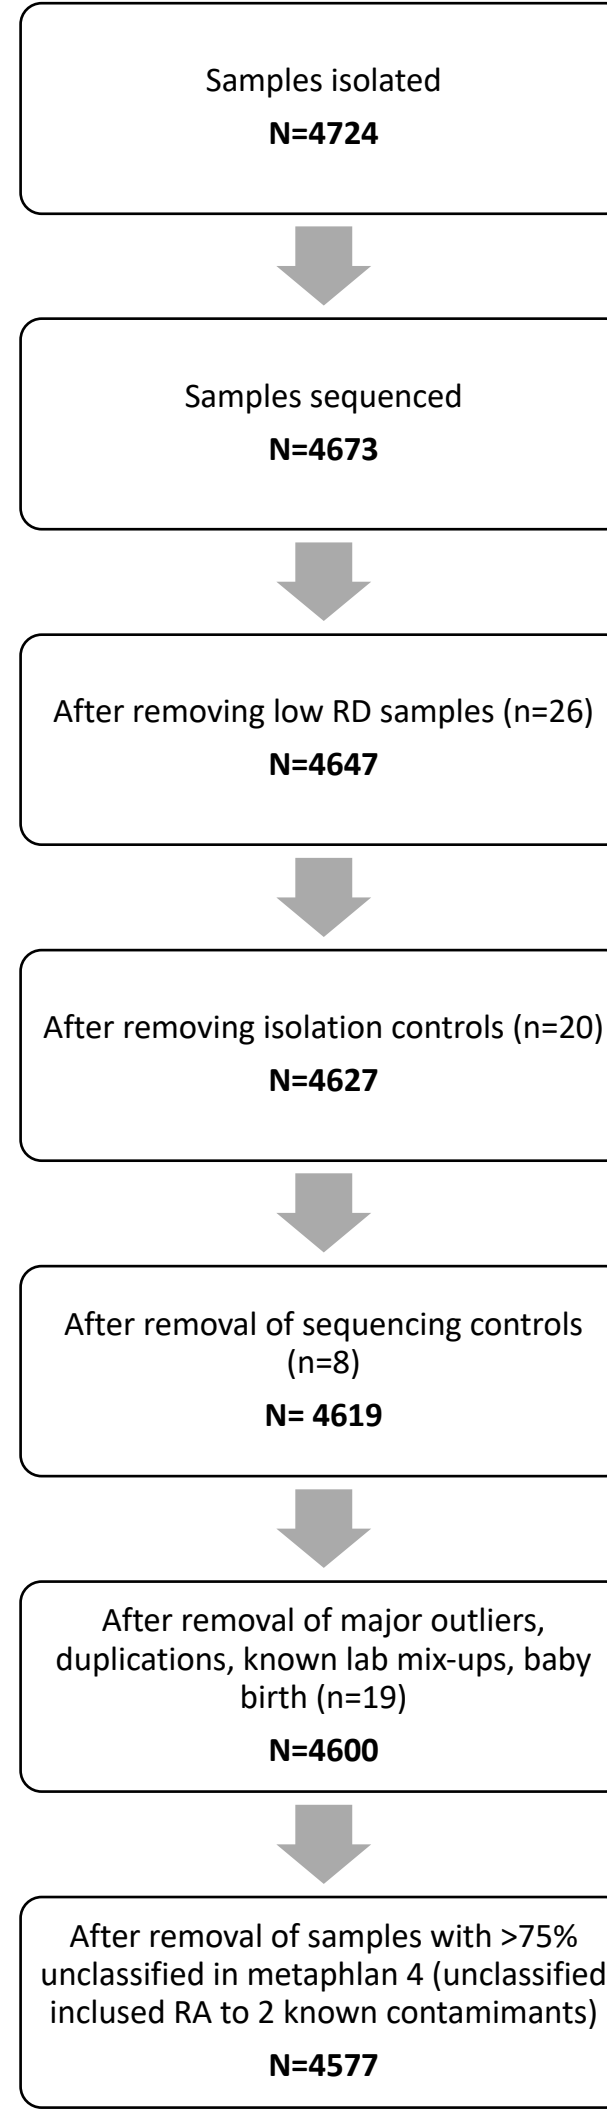

Supplement: Supplementary file 1 [file c23112229374566920cecd7b.pdf]
